# Supplementary material for: Building Disease-Specific Drug-Protein Connectivity Maps from Molecular Interaction Networks and PubMed Abstracts
Source: PLoS Comput Biol. 2009 Jul 31;5(7):e1000450. doi: 10.1371/journal.pcbi.1000450 (PMC2709445; doi:10.1371/journal.pcbi.1000450)
Supplement: Dataset S2 — The table contains 2,019 drugs identified from 222,609 PubMed abstracts related to AD protein interaction network. It also contains the False Discover Rate (FDR), document frequency in the AD related corpus (DF_AD), Pharmacological Action, and validation flag for each drug. (0.33 MB XLS) [file pcbi.1000450.s002.xls]

## Sheet: AD
Drug	FDR	DF_AD	Pharmacological Action	Found In AD-GS	Found In DrugBank
Rivastigmine	<1.00E-16	14	Cholinesterase Inhibitors;Neuroprotective Agents	Yes	Yes
Antibodies, Monoclonal	<1.00E-16	4764	Immunologic Factors	Yes	No
Tetradecanoylphorbol Acetate	<1.00E-16	2019	Carcinogens	Yes	No
Antibodies	<1.00E-16	1981	Immunologic Factors	Yes	No
Superoxide Dismutase	<1.00E-16	1426	Free Radical Scavengers	Yes	No
Norepinephrine	<1.00E-16	1403	Adrenergic alpha-Agonists;Sympathomimetics;Vasoconstrictor Agents	Yes	No
Green Fluorescent Proteins	<1.00E-16	1185	Luminescent Agents	Yes	No
Tretinoin	<1.00E-16	1144	Antineoplastic Agents;Keratolytic Agents	Yes	No
Luciferases	<1.00E-16	1105	Luminescent Agents	Yes	No
Autoantibodies	<1.00E-16	1005	Immunologic Factors	Yes	No
Cycloheximide	<1.00E-16	919	Antibiotics, Antifungal;Protein Synthesis Inhibitors	Yes	No
Interleukin-2	<1.00E-16	831	Antineoplastic Agents;Analgesics, Non-Narcotic	Yes	No
Oxytocin	<1.00E-16	788	Oxytocics	Yes	No
Serotonin	<1.00E-16	774	Serotonin Agents	Yes	No
Gamma-Aminobutyric Acid	<1.00E-16	735	GABA Agents	Yes	No
Cystatins	<1.00E-16	698	Cysteine Proteinase Inhibitors	Yes	No
Plasminogen	<1.00E-16	687	Fibrinolytic Agents	Yes	No
Testosterone	<1.00E-16	686	Androgens	Yes	No
Choline	<1.00E-16	671	Lipotropic Agents;Nootropic Agents	Yes	No
Cyclin-Dependent Kinase Inhibitor P27	<1.00E-16	642	Protein Kinase Inhibitors	Yes	No
Complement C9	<1.00E-16	597	Immunologic Factors	Yes	No
Superoxides	<1.00E-16	591	Oxidants	Yes	No
Vasopressins	<1.00E-16	589	Hemostatics;Antidiuretic Agents;Vasoconstrictor Agents	Yes	No
Copper	<1.00E-16	573	Trace Elements	Yes	No
Cisplatin	<1.00E-16	571	Antineoplastic Agents;Radiation-Sensitizing Agents;Cross-Linking Reagents	Yes	No
Doxorubicin	<1.00E-16	560	Antibiotics, Antineoplastic	Yes	No
Immunoglobulin M	<1.00E-16	556	Immunologic Factors	Yes	No
Immunoglobulin A	<1.00E-16	542	Immunologic Factors	Yes	No
Sirolimus	<1.00E-16	513	Antibiotics, Antineoplastic;Antifungal Agents;Immunosuppressive Agents;Anti-Bacterial Agents	Yes	No
Follicle Stimulating Hormone	<1.00E-16	501	Hormones	Yes	No
Alpha 1-Antitrypsin	<1.00E-16	498	Serine Proteinase Inhibitors;Trypsin Inhibitors	Yes	No
Cyclosporine	<1.00E-16	468	Antifungal Agents;Antirheumatic Agents;Dermatologic Agents;Enzyme Inhibitors;Immunosuppressive Agents	Yes	No
Polychlorinated Biphenyls	<1.00E-16	464	Environmental Pollutants	Yes	No
Immunoglobulins	<1.00E-16	456	Immunologic Factors	Yes	No
Dizocilpine Maleate	<1.00E-16	454	Neuroprotective Agents;Excitatory Amino Acid Antagonists	Yes	No
Etoposide	<1.00E-16	414	Antineoplastic Agents, Phytogenic	Yes	No
Tacrolimus	<1.00E-16	393	Immunosuppressive Agents	Yes	No
Staurosporine	<1.00E-16	380	Enzyme Inhibitors	Yes	No
Gtpase-Activating Proteins	<1.00E-16	362	GTP Phosphohydrolase Activators	Yes	No
Edetic Acid	<1.00E-16	354	Anticoagulants;Chelating Agents;Food Additives	Yes	No
Receptors, Antigen, B-Cell	<1.00E-16	341	Immunologic Factors	Yes	No
Interleukin-12	<1.00E-16	335	Adjuvants, Immunologic;Angiogenesis Inhibitors	Yes	No
Propranolol	<1.00E-16	333	Adrenergic beta-Antagonists;Anti-Anxiety Agents;Vasodilator Agents;Anti-Arrhythmia Agents;Antihypertensive Agents	Yes	No
Substance P	<1.00E-16	327	Neurotransmitter Agents	Yes	No
Endothelial Growth Factors	<1.00E-16	319	Growth Substances	Yes	No
Polyethylene Glycols	<1.00E-16	299	Surface-Active Agents;Drug Carriers;Solvents	Yes	No
Complement Membrane Attack Complex	<1.00E-16	298	Immunologic Factors	Yes	No
Bradykinin	<1.00E-16	284	Vasodilator Agents	Yes	No
Complement C5	<1.00E-16	283	Immunologic Factors	Yes	No
Catalase	<1.00E-16	274	Antioxidants	Yes	No
Concanavalin A	<1.00E-16	260	Mitogens	Yes	No
Atropine	<1.00E-16	257	Adjuvants, Anesthesia;Mydriatics;Muscarinic Antagonists;Parasympatholytics;Bronchodilator Agents;Anti-Arrhythmia Agents	Yes	No
Caseins	<1.00E-16	257	Chelating Agents	Yes	No
Plasminogen Inactivators	<1.00E-16	252	Serine Proteinase Inhibitors	Yes	No
Immunoglobulin Heavy Chains	<1.00E-16	241	Immunologic Factors	Yes	No
Caffeine	<1.00E-16	235	Phosphodiesterase Inhibitors;Central Nervous System Stimulants	Yes	No
Thyrotropin-Releasing Hormone	<1.00E-16	235	Hormones	Yes	No
Calcitriol	<1.00E-16	234	Vitamins;Bone Density Conservation Agents;Calcium Channel Agonists	Yes	No
Methotrexate	<1.00E-16	234	Abortifacient Agents, Nonsteroidal;Dermatologic Agents;Antimetabolites, Antineoplastic;Enzyme Inhibitors;Nucleic Acid Synthesis Inhibitors;Antirheumatic Agents;Immunosuppressive Agents;Folic Acid Antagonists	Yes	No
Cholera Toxin	<1.00E-16	215	Poisons;Adjuvants, Immunologic	Yes	No
Amino Acid Chloromethyl Ketones	<1.00E-16	210	Alkylating Agents;Serine Proteinase Inhibitors;Protein Synthesis Inhibitors	Yes	No
Kallikreins	<1.00E-16	210	Coagulants;Fertility Agents, Male	Yes	No
Vitamin A	<1.00E-16	209	Vitamins	Yes	No
Octoxynol	<1.00E-16	207	Antifoaming Agents;Excipients;Detergents;Surface-Active Agents;Spermatocidal Agents	Yes	No
Phenylephrine	<1.00E-16	205	Adrenergic alpha-Agonists;Cardiotonic Agents;Sympathomimetics;Nasal Decongestants;Vasoconstrictor Agents;Mydriatics	Yes	No
Isoflurane	<1.00E-16	204	Anesthetics, Inhalation	Yes	No
Thapsigargin	<1.00E-16	197	Enzyme Inhibitors	Yes	No
Haloperidol	<1.00E-16	195	Antiemetics;Anti-Dyskinesia Agents;Dopamine Antagonists;Antipsychotic Agents	Yes	No
Interferon-Alpha	<1.00E-16	195	Antiviral Agents;Angiogenesis Inhibitors;Biological Response Modifiers	Yes	No
Phytohemagglutinins	<1.00E-16	190	Mitogens	Yes	No
Clonidine	<1.00E-16	182	Adrenergic alpha-Agonists;Sympatholytics;Analgesics;Antihypertensive Agents	Yes	No
Annexin A5	<1.00E-16	179	Enzyme Inhibitors	Yes	No
Kainic Acid	<1.00E-16	177	Antinematodal Agents;Excitatory Amino Acid Agonists	Yes	No
Ouabain	<1.00E-16	177	Cardiotonic Agents;Enzyme Inhibitors	Yes	No
Antithrombin Iii	<1.00E-16	176	Anticoagulants;Serine Proteinase Inhibitors	Yes	No
Biotin	<1.00E-16	176	Vitamin B Complex	Yes	No
Ng-Nitroarginine Methyl Ester	<1.00E-16	176	Enzyme Inhibitors	Yes	No
Formaldehyde	<1.00E-16	174	Disinfectants;Fixatives	Yes	No
Corticotropin-Releasing Hormone	<1.00E-16	169	Hormones	Yes	No
Carbon Monoxide	<1.00E-16	166	Antimetabolites	Yes	No
Complement C3B	<1.00E-16	157	Immunologic Factors	Yes	No
Fluorescein-5-Isothiocyanate	<1.00E-16	154	Fluorescent Dyes	Yes	No
Diazepam	<1.00E-16	149	Adjuvants, Anesthesia;Anti-Anxiety Agents;GABA Modulators;Anesthetics, Intravenous;Muscle Relaxants, Central;Anticonvulsants;Antiemetics;Hypnotics and Sedatives	Yes	No
Mitomycin	<1.00E-16	142	Nucleic Acid Synthesis Inhibitors;Antibiotics, Antineoplastic;Cross-Linking Reagents;Alkylating Agents	Yes	No
9,10-Dimethyl-1,2-Benzanthracene	<1.00E-16	140	Carcinogens	Yes	No
Deamino Arginine Vasopressin	<1.00E-16	140	Antidiuretic Agents;Hemostatics	Yes	No
Bromocriptine	<1.00E-16	139	Antiparkinson Agents;Dopamine Agonists;Hormone Antagonists	Yes	No
Immunoglobulin Variable Region	<1.00E-16	139	Immunologic Factors	Yes	No
Chloroquine	<1.00E-16	133	Amebicides;Antirheumatic Agents;Antimalarials	Yes	No
Complement Inactivator Proteins	<1.00E-16	131	Complement Inactivating Agents	Yes	No
Tetrazolium Salts	<1.00E-16	131	Indicators and Reagents	Yes	No
Aprotinin	<1.00E-16	127	Trypsin Inhibitors;Serine Proteinase Inhibitors;Hemostatics	Yes	No
Durapatite	<1.00E-16	127	Biocompatible Materials	Yes	No
Oxidopamine	<1.00E-16	126	Sympatholytics;Adrenergic Agents	Yes	No
Interferon-Gamma, Recombinant	<1.00E-16	122	Antineoplastic Agents;Antiviral Agents	Yes	No
Hyaluronic Acid	<1.00E-16	119	Adjuvants, Immunologic	Yes	No
Azacitidine	<1.00E-16	116	Antimetabolites, Antineoplastic;Enzyme Inhibitors	Yes	No
Beta-Endorphin	<1.00E-16	114	Neurotransmitter Agents	Yes	No
Antibodies, Antinuclear	<1.00E-16	112	Immunologic Factors	Yes	No
Phosphothreonine	<1.00E-16	111	Indicators and Reagents	Yes	No
Protein C	<1.00E-16	111	Anticoagulants;Fibrinolytic Agents	Yes	No
Carotenoids	<1.00E-16	108	Antioxidants	Yes	No
Opsonin Proteins	<1.00E-16	106	Immunologic Factors	Yes	No
Ozone	<1.00E-16	102	Oxidants, Photochemical	Yes	No
Flutamide	<1.00E-16	100	Antineoplastic Agents, Hormonal;Androgen Antagonists	Yes	No
Citric Acid	<1.00E-16	98	Anticoagulants;Chelating Agents	Yes	No
Lithium Chloride	<1.00E-16	95	Adjuvants, Immunologic;Antimanic Agents	Yes	No
Monensin	<1.00E-16	95	Antifungal Agents;Coccidiostats;Ionophores;Antiprotozoal Agents	Yes	No
Immunoglobulin Isotypes	<1.00E-16	93	Immunologic Factors	Yes	No
8-Hydroxy-2-(Di-N-Propylamino)Tetralin	<1.00E-16	90	Serotonin Agonists	Yes	No
Fibrin Fibrinogen Degradation Products	<1.00E-16	90	Anticoagulants	Yes	No
Glyburide	<1.00E-16	90	Hypoglycemic Agents;Anti-Arrhythmia Agents	Yes	No
Desipramine	<1.00E-16	89	Enzyme Inhibitors;Antidepressive Agents, Tricyclic;Adrenergic Uptake Inhibitors	Yes	No
Complement C1	<1.00E-16	87	Immunologic Factors	Yes	No
Strychnine	<1.00E-16	85	Convulsants;Glycine Agents;Poisons	Yes	No
Diphosphonates	<1.00E-16	79	Bone Density Conservation Agents	Yes	No
Isoflurophate	<1.00E-16	78	Cholinesterase Inhibitors;Protease Inhibitors;Miotics	Yes	No
Peroxides	<1.00E-16	77	Oxidants	Yes	No
Amphetamine	<1.00E-16	75	Central Nervous System Stimulants;Dopamine Uptake Inhibitors;Dopamine Agents;Adrenergic Agents;Adrenergic Uptake Inhibitors;Sympathomimetics	Yes	No
Antibodies, Anticardiolipin	<1.00E-16	74	Immunologic Factors	Yes	No
Leuprolide	<1.00E-16	73	Fertility Agents, Female;Antineoplastic Agents, Hormonal	Yes	No
Clozapine	<1.00E-16	72	Serotonin Antagonists;GABA Antagonists;Antipsychotic Agents	Yes	No
Endostatins	<1.00E-16	71	Antineoplastic Agents;Angiogenesis Inhibitors	Yes	No
Phencyclidine	<1.00E-16	70	Enzyme Inhibitors;Excitatory Amino Acid Antagonists;Hallucinogens	Yes	No
Enkephalin, Methionine	<1.00E-16	67	Neurotransmitter Agents	Yes	No
Dextroamphetamine	<1.00E-16	65	Sympathomimetics;Dopamine Uptake Inhibitors;Central Nervous System Stimulants;Dopamine Agents;Adrenergic Agents;Adrenergic Uptake Inhibitors	Yes	No
Vitamin D	<1.00E-16	65	Bone Density Conservation Agents;Vitamins	Yes	No
Butyric Acid	<1.00E-16	64	Histamine Antagonists	Yes	No
Complement Factor H	<1.00E-16	64	Complement Inactivating Agents	Yes	No
Ketamine	<1.00E-16	64	Anesthetics, Dissociative;Excitatory Amino Acid Antagonists;Analgesics	Yes	No
Complement C1 Inactivator Proteins	<1.00E-16	63	Complement Inactivating Agents	Yes	No
Fluorescein	<1.00E-16	63	Contrast Media;Fluorescent Dyes	Yes	No
Protein S	<1.00E-16	61	Anticoagulants	Yes	No
Simvastatin	<1.00E-16	59	Antilipemic Agents;Hydroxymethylglutaryl-CoA Reductase Inhibitors;Anticholesteremic Agents	Yes	No
Medroxyprogesterone 17-Acetate	<1.00E-16	57	Contraceptive Agents, Female;Contraceptive Agents, Male;Antineoplastic Agents, Hormonal	Yes	No
Minocycline	<1.00E-16	55	Anti-Bacterial Agents	Yes	No
Kinetin	<1.00E-16	54	Plant Growth Regulators	Yes	No
Platelet Factor 4	<1.00E-16	53	Coagulants	Yes	No
Collodion	<1.00E-16	49	Tissue Adhesives;Explosive Agents	Yes	No
Propidium	<1.00E-16	49	Coloring Agents;Intercalating Agents;Indicators and Reagents	Yes	No
Congo Red	<1.00E-16	47	Coloring Agents	Yes	No
Oxotremorine	<1.00E-16	46	Muscarinic Agonists	Yes	No
Rotenone	<1.00E-16	43	Insecticides;Uncoupling Agents	Yes	No
Complement C3C	<1.00E-16	42	Immunologic Factors	Yes	No
Flumazenil	<1.00E-16	42	GABA Modulators;Antidotes	Yes	No
Pravastatin	<1.00E-16	40	Anticholesteremic Agents;Hydroxymethylglutaryl-CoA Reductase Inhibitors	Yes	No
Ticlopidine	<1.00E-16	40	Fibrinolytic Agents;Platelet Aggregation Inhibitors	Yes	No
Complement C3A	<1.00E-16	39	Immunologic Factors	Yes	No
Clomipramine	<1.00E-16	38	Antidepressive Agents, Tricyclic;Serotonin Uptake Inhibitors	Yes	No
Molsidomine	<1.00E-16	38	Vasodilator Agents;Nitric Oxide Donors	Yes	No
Ethylnitrosourea	<1.00E-16	36	Alkylating Agents	Yes	No
Paroxetine	<1.00E-16	36	Serotonin Uptake Inhibitors;Antidepressive Agents, Second-Generation	Yes	No
Citalopram	<1.00E-16	35	Serotonin Uptake Inhibitors;Antidepressive Agents, Second-Generation	Yes	No
Filipin	<1.00E-16	35	Anti-Bacterial Agents;Antibiotics, Antifungal;Antiviral Agents	Yes	No
Secretory Component	<1.00E-16	31	Immunologic Factors	Yes	No
Bupropion	<1.00E-16	30	Antidepressive Agents, Second-Generation;Dopamine Uptake Inhibitors	Yes	No
Sulindac	<1.00E-16	29	Antineoplastic Agents;Cyclooxygenase Inhibitors;Anti-Inflammatory Agents, Non-Steroidal	Yes	No
Idazoxan	<1.00E-16	28	Adrenergic alpha-Antagonists	Yes	No
Ditiocarb	<1.00E-16	25	Adjuvants, Immunologic;Antiviral Agents;Chelating Agents	Yes	No
Potassium Cyanide	<1.00E-16	25	Enzyme Inhibitors;Poisons	Yes	No
S-Nitrosothiols	<1.00E-16	25	Anti-Infective Agents;Vasodilator Agents;Nitric Oxide Donors;Platelet Aggregation Inhibitors;Bronchodilator Agents	Yes	No
Pteroylpolyglutamic Acids	<1.00E-16	24	Vitamin B Complex	Yes	No
Muscarine	<1.00E-16	21	Parasympathomimetics;Muscarinic Agonists	Yes	No
Quisqualic Acid	<1.00E-16	21	Excitatory Amino Acid Agonists	Yes	No
Rolipram	<1.00E-16	21	Antidepressive Agents;Phosphodiesterase Inhibitors	Yes	No
Thiorphan	<1.00E-16	20	Protease Inhibitors	Yes	No
Excitatory Amino Acids	<1.00E-16	16	Neurotransmitter Agents	Yes	No
Flufenamic Acid	<1.00E-16	15	Anti-Inflammatory Agents	Yes	No
Immunoglobulin Gamma-Chains	<1.00E-16	15	Immunologic Factors	Yes	No
Protein C Inhibitor	<1.00E-16	12	Serine Proteinase Inhibitors	Yes	No
Venoms	<1.00E-16	12	Poisons	Yes	No
Guanfacine	<1.00E-16	10	Adrenergic alpha-Agonists;Antihypertensive Agents;Sympatholytics	Yes	No
Hematoxylin	<1.00E-16	10	Coloring Agents	Yes	No
Amantadine	<1.00E-16	6	Antiparkinson Agents;Analgesics, Non-Narcotic;Antiviral Agents;Dopamine Agents	Yes	No
Complement C7	<1.00E-16	337	Immunologic Factors	No	No
Complement C6	<1.00E-16	219	Immunologic Factors	No	No
Eflornithine	<1.00E-16	215	Antineoplastic Agents;Trypanocidal Agents;Enzyme Inhibitors	No	No
Ras Gtpase-Activating Proteins	<1.00E-16	211	GTP Phosphohydrolase Activators	No	No
Triptorelin	<1.00E-16	196	Luteolytic Agents;Antineoplastic Agents, Hormonal	No	No
Tetrachlorodibenzodioxin	<1.00E-16	173	Environmental Pollutants;Teratogens	No	No
Oxytetracycline	<1.00E-16	171	Anti-Bacterial Agents	No	No
Tissue Inhibitor Of Metalloproteinase-1	<1.00E-16	159	Antineoplastic Agents;Protease Inhibitors	No	No
Procainamide	<1.00E-16	146	Platelet Aggregation Inhibitors;Anti-Arrhythmia Agents	No	No
Tissue Inhibitor Of Metalloproteinases	<1.00E-16	143	Antineoplastic Agents;Protease Inhibitors	No	No
Furosemide	<1.00E-16	136	Sodium Potassium Chloride Symporter Inhibitors;Diuretics	No	No
Bile Acids And Salts	<1.00E-16	129	Gastrointestinal Agents	No	No
3,4-Dichloro-N-Methyl-N-(2-(1-Pyrrolidinyl)-Cyclohexyl)-Benzeneacetamide, (Trans)-Isomer	<1.00E-16	128	Antihypertensive Agents;Analgesics, Non-Narcotic	No	No
Vigabatrin	<1.00E-16	122	Anticonvulsants;Enzyme Inhibitors;GABA Agents	No	No
Antibodies, Protozoan	<1.00E-16	120	Immunologic Factors	No	No
Cyclin-Dependent Kinase Inhibitor P18	<1.00E-16	117	Protein Kinase Inhibitors	No	No
Arsenicals	<1.00E-16	116	Sulfhydryl Reagents	No	No
Vinblastine	<1.00E-16	116	Antineoplastic Agents, Phytogenic;Tubulin Modulators	No	No
Clomiphene	<1.00E-16	115	Estrogen Antagonists;Selective Estrogen Receptor Modulators;Fertility Agents, Female	No	No
Abscisic Acid	<1.00E-16	113	Plant Growth Regulators	No	No
Lupus Coagulation Inhibitor	<1.00E-16	110	Immunologic Factors	No	No
Antibodies, Neoplasm	<1.00E-16	105	Immunologic Factors	No	No
Cyclin-Dependent Kinase Inhibitor P15	<1.00E-16	104	Protein Kinase Inhibitors	No	No
Acecainide	<1.00E-16	100	Anti-Arrhythmia Agents	No	No
Vehicle Emissions	<1.00E-16	99	Air Pollutants	No	No
Mycotoxins	<1.00E-16	98	Poisons	No	No
Phosphonoacetic Acid	<1.00E-16	94	Antiviral Agents;Enzyme Inhibitors;Reverse Transcriptase Inhibitors	No	No
Vasotocin	<1.00E-16	91	Vasoconstrictor Agents;Oxytocics	No	No
Puromycin	<1.00E-16	88	Antimetabolites, Antineoplastic;Trypanocidal Agents;Protein Synthesis Inhibitors	No	No
Protamines	<1.00E-16	84	Heparin Antagonists	No	No
Aphidicolin	<1.00E-16	83	Antiviral Agents;Enzyme Inhibitors	No	No
Hiv Antibodies	<1.00E-16	82	Immunologic Factors	No	No
Diethylnitrosamine	<1.00E-16	80	Alkylating Agents	No	No
Albuterol	<1.00E-16	79	Bronchodilator Agents;Adrenergic beta-Agonists;Tocolytic Agents	No	No
Methacholine Chloride	<1.00E-16	78	Miotics;Bronchoconstrictor Agents;Muscarinic Agonists;Parasympathomimetics	No	No
Deoxycholic Acid	<1.00E-16	77	Detergents	No	No
Dipyridamole	<1.00E-16	76	Phosphodiesterase Inhibitors;Platelet Aggregation Inhibitors;Vasodilator Agents	No	No
Ristocetin	<1.00E-16	75	Anti-Bacterial Agents	No	No
Cephalosporins	<1.00E-16	71	Anti-Bacterial Agents	No	No
Acetic Acid	<1.00E-16	67	Indicators and Reagents	No	No
Streptomycin	<1.00E-16	66	Protein Synthesis Inhibitors;Anti-Bacterial Agents	No	No
Allopurinol	<1.00E-16	64	Antimetabolites;Enzyme Inhibitors;Free Radical Scavengers;Gout Suppressants	No	No
Msh Release-Inhibiting Hormone	<1.00E-16	64	Hormones	No	No
Gamma-Globulins	<1.00E-16	63	Immunologic Factors	No	No
Cyclin-Dependent Kinase Inhibitor P57	<1.00E-16	60	Protein Kinase Inhibitors	No	No
Trifluoperazine	<1.00E-16	60	Antiemetics;Dopamine Antagonists;Antipsychotic Agents	No	No
Hirudins	<1.00E-16	55	Protease Inhibitors;Fibrinolytic Agents	No	No
Ganciclovir	<1.00E-16	54	Antiviral Agents	No	No
Iodoacetamide	<1.00E-16	51	Alkylating Agents;Enzyme Inhibitors	No	No
Antibodies, Fungal	<1.00E-16	50	Immunologic Factors	No	No
Vidarabine	<1.00E-16	50	Antimetabolites;Antiviral Agents	No	No
Complement C3B Inactivator Proteins	<1.00E-16	48	Complement Inactivating Agents	No	No
Clarithromycin	<1.00E-16	46	Protein Synthesis Inhibitors;Anti-Bacterial Agents	No	No
Demecolcine	<1.00E-16	46	Antineoplastic Agents, Phytogenic;Tubulin Modulators	No	No
Menotropins	<1.00E-16	46	Fertility Agents, Female	No	No
Thioguanine	<1.00E-16	43	Antimetabolites, Antineoplastic	No	No
Muromonab-Cd3	<1.00E-16	42	Immunologic Factors;Immunosuppressive Agents	No	No
Mechlorethamine	<1.00E-16	41	Antineoplastic Agents, Alkylating;Alkylating Agents;Chemical Warfare Agents;Irritants	No	No
Domperidone	<1.00E-16	38	Antiemetics;Dopamine Antagonists	No	No
Iloprost	<1.00E-16	37	Platelet Aggregation Inhibitors;Vasodilator Agents	No	No
Antibodies, Antineutrophil Cytoplasmic	<1.00E-16	36	Immunologic Factors	No	No
Complement Factor D	<1.00E-16	36	Immunologic Factors	No	No
Ethambutol	<1.00E-16	36	Antitubercular Agents	No	No
Alpha-Methyltyrosine	<1.00E-16	35	Enzyme Inhibitors	No	No
Interferon Alfa-2B	<1.00E-16	35	Antineoplastic Agents;Angiogenesis Inhibitors;Antiviral Agents	No	No
Cilastatin	<1.00E-16	34	Protease Inhibitors	No	No
Vinyl Chloride	<1.00E-16	33	Carcinogens	No	No
Adenosine-5'-(N-Ethylcarboxamide)	<1.00E-16	31	Antineoplastic Agents;Vasodilator Agents	No	No
Enalaprilat	<1.00E-16	30	Antihypertensive Agents;Angiotensin-Converting Enzyme Inhibitors	No	No
Vitamin K 1	<1.00E-16	30	Vitamins;Antifibrinolytic Agents	No	No
Bromides	<1.00E-16	28	Anticonvulsants	No	No
Butylated Hydroxytoluene	<1.00E-16	28	Antioxidants	No	No
Beta-Lactams	<1.00E-16	27	Anti-Bacterial Agents	No	No
Novobiocin	<1.00E-16	27	Anti-Bacterial Agents;Enzyme Inhibitors	No	No
P-Aminohippuric Acid	<1.00E-16	26	Indicators and Reagents	No	No
4-Nitroquinoline-1-Oxide	<1.00E-16	25	Carcinogens;Mutagens	No	No
Dichlorodiphenyl Dichloroethylene	<1.00E-16	24	Insecticides	No	No
Fenretinide	<1.00E-16	24	Antineoplastic Agents;Anticarcinogenic Agents	No	No
Idarubicin	<1.00E-16	24	Antibiotics, Antineoplastic	No	No
Coformycin	<1.00E-16	23	Antibiotics, Antineoplastic;Enzyme Inhibitors;Immunosuppressive Agents	No	No
Urethane	<1.00E-16	23	Antineoplastic Agents;Carcinogens;Anesthetics, Intravenous	No	No
Etorphine	<1.00E-16	22	Analgesics, Opioid;Hypnotics and Sedatives;Narcotics	No	No
Phenylglyoxal	<1.00E-16	22	Enzyme Inhibitors;Indicators and Reagents	No	No
Sufentanil	<1.00E-16	21	Analgesics, Opioid;Adjuvants, Anesthesia;Anesthetics, Intravenous;Narcotics	No	No
Goserelin	<1.00E-16	20	Antineoplastic Agents, Hormonal	No	No
Mitoguazone	<1.00E-16	20	Antineoplastic Agents;Enzyme Inhibitors	No	No
Thioinosine	<1.00E-16	20	Antimetabolites, Antineoplastic;Immunosuppressive Agents	No	No
2,2'-Dipyridyl	<1.00E-16	18	Chelating Agents;Indicators and Reagents	No	No
Quipazine	<1.00E-16	18	Oxytocics;Antidepressive Agents, Second-Generation;Serotonin Agonists	No	No
Tosyllysine Chloromethyl Ketone	<1.00E-16	18	Alkylating Agents;Serine Proteinase Inhibitors;Protein Synthesis Inhibitors	No	No
Isopentenyladenosine	<1.00E-16	17	Plant Growth Regulators	No	No
Paraffin	<1.00E-16	17	Sclerosing Solutions	No	No
Succimer	<1.00E-16	17	Chelating Agents;Antidotes	No	No
Antibodies, Bispecific	<1.00E-16	16	Immunologic Factors	No	No
Peptichemio	<1.00E-16	15	Antimetabolites, Antineoplastic;Antineoplastic Agents, Alkylating	No	No
Saxitoxin	<1.00E-16	15	Poisons	No	No
Trypsin Inhibitor, Bowman-Birk Soybean	<1.00E-16	15	Trypsin Inhibitors	No	No
1-Deoxynojirimycin	<1.00E-16	14	Antiviral Agents;Enzyme Inhibitors	No	No
Trimethoprim	<1.00E-16	14	Anti-Infective Agents, Urinary;Antimalarials;Folic Acid Antagonists	No	No
Kallidin	<1.00E-16	13	Antihypertensive Agents;Vasodilator Agents	No	No
Quinacrine Mustard	<1.00E-16	12	Fluorescent Dyes	No	No
Zeatin	<1.00E-16	12	Plant Growth Regulators	No	No
Fenoldopam	<1.00E-16	11	Antihypertensive Agents;Vasodilator Agents;Dopamine Agonists	No	No
1-Sarcosine-8-Isoleucine Angiotensin Ii	<1.00E-16	10	Angiotensin-Converting Enzyme Inhibitors;Antihypertensive Agents;Angiotensin II Type 1 Receptor Blockers	No	No
Bufanolides	<1.00E-16	10	Cardiotonic Agents	No	No
Digitalis Glycosides	<1.00E-16	10	Anti-Arrhythmia Agents;Enzyme Inhibitors;Cardiotonic Agents	No	No
O-Aminoazotoluene	<1.00E-16	10	Coloring Agents	No	No
Precipitins	<1.00E-16	8	Agglutinins	No	No
Propylene Glycol	<1.00E-16	8	Solvents;Vehicles	No	No
Sulfamethoxazole	<1.00E-16	6	Anti-Infective Agents	No	No
Cefuroxime	<1.00E-16	4	Anti-Bacterial Agents	No	No
Eosinophil Cationic Protein	<1.00E-16	1	Immunologic Factors	No	No
Immunoglobulin Fab Fragments	6.63e-16	221	Immunologic Factors	Yes	No
Captopril	6.63e-16	162	Angiotensin-Converting Enzyme Inhibitors;Antihypertensive Agents	Yes	No
Vasoactive Intestinal Peptide	6.63e-16	157	Vasodilator Agents;Neuroprotective Agents;Gastrointestinal Agents	Yes	No
Nitroprusside	6.63e-16	155	Indicators and Reagents;Vasodilator Agents;Antihypertensive Agents;Nitric Oxide Donors	Yes	No
Cyclosporins	6.63e-16	134	Enzyme Inhibitors;Immunosuppressive Agents	Yes	No
Phosphocreatine	6.63e-16	93	Cardiotonic Agents	Yes	No
Interferon-Beta	6.63e-16	78	Antiviral Agents;Angiogenesis Inhibitors;Antineoplastic Agents;Biological Response Modifiers	Yes	No
Carboplatin	6.63e-16	74	Cross-Linking Reagents;Antineoplastic Agents	Yes	No
Buthionine Sulfoximine	6.63e-16	66	Antimetabolites, Antineoplastic;Enzyme Inhibitors;Radiation-Sensitizing Agents;Radiation-Protective Agents;Antimetabolites	Yes	No
4-Aminopyridine	6.63e-16	62	Potassium Channel Blockers	Yes	No
Carbocyanines	6.63e-16	59	Coloring Agents	Yes	No
Hydrogen Sulfide	6.63e-16	57	Air Pollutants	Yes	No
Risperidone	6.63e-16	50	Serotonin Antagonists;Antipsychotic Agents;Dopamine Antagonists	Yes	No
Angiotensinogen	6.63e-16	48	Serine Proteinase Inhibitors	Yes	No
Diphtheria Toxin	6.63e-16	48	Poisons	Yes	No
Alpha-Msh	6.63e-16	40	Hormones	Yes	No
Marine Toxins	6.63e-16	40	Poisons	Yes	No
Antigens, Cd46	6.63e-16	36	Immunologic Factors	Yes	No
Antimycin A	6.63e-16	35	Antifungal Agents;Anti-Bacterial Agents	Yes	No
Botulinum Toxin Type A	6.63e-16	34	Neuromuscular Agents;Neurotoxins	Yes	No
Betaine	6.63e-16	32	Gastrointestinal Agents;Lipotropic Agents	Yes	No
Dermatan Sulfate	6.63e-16	31	Anticoagulants	Yes	No
Diamide	6.63e-16	30	Radiation-Sensitizing Agents;Sulfhydryl Reagents	Yes	No
Neurokinin B	6.63e-16	22	Neurotransmitter Agents	Yes	No
P-Chloroamphetamine	6.63e-16	22	Serotonin Agents	Yes	No
Gold Colloid, Radioactive	6.63e-16	1	Antineoplastic Agents;Radiopharmaceuticals	Yes	No
Nitroglycerin	6.63e-16	90	Vasodilator Agents;Tocolytic Agents;Explosive Agents	No	No
Streptokinase	6.63e-16	83	Fibrinolytic Agents	No	No
Technetium Tc 99M Sestamibi	6.63e-16	68	Radiopharmaceuticals	No	No
Gramicidin	6.63e-16	47	Anti-Bacterial Agents;Anti-Infective Agents, Local	No	No
Tissue Inhibitor Of Metalloproteinase-3	6.63e-16	44	Protease Inhibitors	No	No
S-Nitrosoglutathione	6.63e-16	39	Anti-Infective Agents;Platelet Aggregation Inhibitors;Nitric Oxide Donors;Neuroprotective Agents;Vasodilator Agents;Bronchodilator Agents	No	No
Htlv-I Antibodies	6.63e-16	38	Immunologic Factors	No	No
Penicillin G	6.63e-16	27	Anti-Bacterial Agents;GABA Modulators;Convulsants	No	No
Aroclor 1254	6.63e-16	26	Antithyroid Agents	No	No
Complement C5B	6.63e-16	26	Immunologic Factors	No	No
Interferon Alfa-2A	6.63e-16	26	Antiviral Agents;Angiogenesis Inhibitors;Antineoplastic Agents	No	No
Turpentine	6.63e-16	26	Irritants;Solvents	No	No
Chloroform	6.63e-16	25	Solvents	No	No
Nandrolone	6.63e-16	25	Androgens;Anabolic Agents	No	No
Amoxicillin	6.63e-16	23	Anti-Bacterial Agents	No	No
Antigens, Cd79	6.63e-16	23	Immunologic Factors	No	No
Complement Factor I	6.63e-16	23	Complement Inactivating Agents	No	No
Tosylphenylalanyl Chloromethyl Ketone	6.63e-16	22	Alkylating Agents;Protein Synthesis Inhibitors;Serine Proteinase Inhibitors	No	No
Boron	6.63e-16	11	Trace Elements	No	No
Ceftriaxone	6.63e-16	11	Anti-Bacterial Agents	No	No
Toxaphene	6.63e-16	11	Insecticides	No	No
Alpha-Chlorohydrin	6.63e-16	8	Chemosterilants	No	No
Methicillin	6.63e-16	8	Anti-Bacterial Agents	No	No
Methoxyflurane	6.63e-16	3	Anesthetics, Inhalation	No	No
Fluoresceins	1.28e-15	129	Fluorescent Dyes	Yes	No
Penicillamine	1.28e-15	86	Antidotes;Antirheumatic Agents;Chelating Agents	Yes	No
Omega-N-Methylarginine	1.28e-15	60	Enzyme Inhibitors	Yes	No
Methamphetamine	1.28e-15	59	Sympathomimetics;Adrenergic Agents;Central Nervous System Stimulants;Dopamine Agents;Adrenergic Uptake Inhibitors;Dopamine Uptake Inhibitors	Yes	No
2-Acetylaminofluorene	1.28e-15	42	Carcinogens	Yes	No
Immunoglobulin Lambda-Chains	1.28e-15	34	Immunologic Factors	Yes	No
Nicotinic Acids	1.28e-15	32	Vitamin B Complex	Yes	No
Dansyl Compounds	1.28e-15	26	Indicators and Reagents	Yes	No
Deoxyuridine	1.28e-15	10	Antimetabolites	Yes	No
Ethinyl Estradiol	1.28e-15	69	Estrogens	No	No
Dacarbazine	1.28e-15	33	Antineoplastic Agents, Alkylating	No	No
Trichloroacetic Acid	1.28e-15	15	Caustics	No	No
Epinephrine	1.86e-15	426	Mydriatics;Bronchodilator Agents;Sympathomimetics;Adrenergic alpha-Agonists;Adrenergic Agonists;Adrenergic beta-Agonists;Vasoconstrictor Agents	Yes	No
Hydroxyl Radical	1.86e-15	120	Oxidants	Yes	No
Vitamin K	1.86e-15	96	Antifibrinolytic Agents;Vitamins	Yes	No
Immunoglobulins, Intravenous	1.86e-15	54	Immunologic Factors	Yes	No
Bcg Vaccine	1.86e-15	41	Adjuvants, Immunologic	Yes	No
Mianserin	1.86e-15	39	Adrenergic alpha-Antagonists;Histamine H1 Antagonists;Serotonin Antagonists;Antidepressive Agents, Second-Generation	Yes	No
Mecamylamine	1.86e-15	25	Antihypertensive Agents;Ganglionic Blockers;Nicotinic Antagonists	Yes	No
Diazoxide	1.86e-15	39	Antihypertensive Agents;Vasodilator Agents	No	No
Anthralin	1.86e-15	21	Dermatologic Agents	No	No
Sorbic Acid	1.86e-15	16	Food Preservatives	No	No
Methohexital	1.86e-15	1	Anesthetics, Intravenous	No	No
Tacrine	2.4e-15	31	Cholinesterase Inhibitors;Parasympathomimetics;Nootropic Agents	Yes	Yes
Acetaminophen	2.4e-15	99	Analgesics, Non-Narcotic	Yes	No
Sertraline	2.4e-15	25	Antidepressive Agents;Serotonin Uptake Inhibitors	Yes	No
Copper Sulfate	2.4e-15	24	Antidotes;Emetics	Yes	No
Gossypol	2.4e-15	17	Contraceptive Agents, Male	Yes	No
Gastrins	2.4e-15	115	Hormones	No	No
Finasteride	2.4e-15	25	Enzyme Inhibitors	No	No
Glycyrrhizic Acid	2.4e-15	18	Anti-Infective Agents;Anti-Inflammatory Agents, Non-Steroidal;Antifungal Agents	No	No
Immunoglobulin Joining Region	2.4e-15	15	Immunologic Factors	No	No
Heparin Cofactor Ii	2.4e-15	13	Serine Proteinase Inhibitors	No	No
Ibogaine	2.4e-15	8	Hallucinogens;Excitatory Amino Acid Antagonists	No	No
Ethionamide	2.4e-15	1	Leprostatic Agents;Antitubercular Agents	No	No
Histamine	2.97e-15	288	Histamine Agents	Yes	No
Mercuric Chloride	2.97e-15	37	Anti-Infective Agents, Local;Disinfectants	No	No
Benzoflavones	2.97e-15	20	Enzyme Inhibitors	No	No
Formyltetrahydrofolates	2.97e-15	14	Vitamin B Complex	No	No
Cefoxitin	3.55e-15	4	Anti-Bacterial Agents	No	No
Ribavirin	4.7e-15	47	Antimetabolites;Antiviral Agents	Yes	No
Ciprofloxacin	4.7e-15	41	Anti-Infective Agents	No	No
Peplomycin	4.7e-15	12	Antibiotics, Antineoplastic	No	No
Donepezil	5.24e-15	16	Cholinesterase Inhibitors;Nootropic Agents	Yes	Yes
Salicylic Acid	5.24e-15	60	Anti-Infective Agents;Antifungal Agents;Keratolytic Agents	Yes	No
Bacitracin	5.24e-15	8	Anti-Infective Agents, Local;Anti-Bacterial Agents	Yes	No
Strophanthins	5.81e-15	4	Cardiotonic Agents;Enzyme Inhibitors	No	No
Cysteamine	6.95e-15	30	Radiation-Protective Agents	Yes	No
Misoprostol	7.5e-15	7	Abortifacient Agents, Nonsteroidal;Oxytocics;Anti-Ulcer Agents	Yes	No
Propylthiouracil	8.05e-15	46	Antimetabolites;Antithyroid Agents	No	No
Hematoporphyrins	1.38e-14	4	Photosensitizing Agents	No	No
Etretinate	2.18e-14	2	Keratolytic Agents	No	No
Palmitoylcarnitine	2.64e-14	9	Vitamin B Complex	Yes	No
Thiouridine	2.97e-14	8	Affinity Labels;Antimetabolites	No	No
Thiamphenicol	3.36e-14	14	Anti-Bacterial Agents;Immunosuppressive Agents	No	No
Sodium Cyanide	3.41e-14	16	Enzyme Inhibitors;Poisons;Indicators and Reagents	Yes	No
Benomyl	4.25e-14	12	Fungicides, Industrial;Anthelmintics;Tubulin Modulators	No	No
Dimethyl Suberimidate	5.03e-14	12	Cross-Linking Reagents;Indicators and Reagents	No	No
Meclofenamic Acid	5.13e-14	16	Anti-Inflammatory Agents, Non-Steroidal;Cyclooxygenase Inhibitors	No	No
Diazooxonorleucine	6.03e-14	9	Antibiotics, Antineoplastic;Antimetabolites, Antineoplastic	No	No
Complement C1R	9.3e-14	7	Immunologic Factors	Yes	No
Dihydroxyphenylalanine	9.93e-14	68	Dopamine Agents	Yes	No
Cryoglobulins	1e-13	34	Immunologic Factors	No	No
Flecainide	1.05e-13	3	Anti-Arrhythmia Agents	No	No
Quinuclidinyl Benzilate	1.2e-13	30	Muscarinic Antagonists	Yes	No
Glycyrrhetinic Acid	1.41e-13	16	Anti-Inflammatory Agents	No	No
Metoclopramide	1.57e-13	48	Antiemetics;Dopamine Antagonists	Yes	No
Polymyxin B	1.6e-13	31	Anti-Bacterial Agents	Yes	No
Carbonyl Cyanide P-Trifluoromethoxyphenylhydrazone	1.94e-13	20	Ionophores;Uncoupling Agents	Yes	No
Sulfamethazine	2.27e-13	13	Anti-Infective Agents	Yes	No
Oleandomycin	3.39e-13	1	Anti-Bacterial Agents	No	No
Zinc Sulfate	3.84e-13	21	Astringents	Yes	No
Pectins	4.35e-13	33	Food Additives	No	No
Thiamine Triphosphate	5.14e-13	7	Vitamin B Complex	No	No
Tetrahydrocannabinol	5.23e-13	44	Hallucinogens;Analgesics, Non-Narcotic;Psychotropic Drugs	Yes	No
Isoniazid	5.26e-13	105	Antitubercular Agents	No	No
Metergoline	5.64e-13	12	Dopamine Agonists;Serotonin Antagonists	No	No
Bismuth	7.18e-13	19	Antacids	Yes	No
Palmitic Acid	7.4e-13	76	Enzyme Inhibitors	Yes	No
Phenylmercuric Acetate	8.21e-13	7	Fungicides, Industrial	Yes	No
Immunoglobulin D	9.44e-13	26	Immunologic Factors	Yes	No
Methyldopa	9.95e-13	10	Adrenergic alpha-Agonists;Sympatholytics;Antihypertensive Agents	No	No
Indapamide	1.04e-12	12	Diuretics;Antihypertensive Agents	No	No
Phenytoin	1.09e-12	51	Anticonvulsants	Yes	No
Sodium Azide	1.5e-12	32	Enzyme Inhibitors;Vasodilator Agents;Indicators and Reagents;Mutagens	Yes	No
Probucol	2.43e-12	19	Anticholesteremic Agents;Antioxidants	Yes	No
Chloral Hydrate	2.64e-12	4	Hypnotics and Sedatives;Anesthetics, Intravenous	Yes	No
Carbenicillin	3.14e-12	6	Anti-Bacterial Agents	No	No
Diphenylcarbazide	3.31e-12	5	Indicators and Reagents	No	No
Vitamin E	3.87e-12	198	Antioxidants;Vitamins	Yes	Yes
Insulin	3.87e-12	2289	Hypoglycemic Agents	Yes	No
Immunoglobulin G	3.87e-12	1672	Immunologic Factors	Yes	No
Plasminogen Activator Inhibitor 1	3.87e-12	1160	Serine Proteinase Inhibitors	Yes	No
Complement C3	3.87e-12	1135	Immunologic Factors	Yes	No
Cyclin-Dependent Kinase Inhibitor P21	3.87e-12	1119	Protein Kinase Inhibitors	Yes	No
Nitric Oxide	3.87e-12	1062	Bronchodilator Agents;Endothelium-Dependent Relaxing Factors;Free Radical Scavengers;Neurotransmitter Agents	Yes	No
Tissue Plasminogen Activator	3.87e-12	1012	Fibrinolytic Agents	Yes	No
Heparin	3.87e-12	999	Anticoagulants;Fibrinolytic Agents	Yes	No
Acetylcholine	3.87e-12	988	Cholinergic Agents;Vasodilator Agents	Yes	No
Interferon Type Ii	3.87e-12	981	Antiviral Agents	Yes	No
Dopamine	3.87e-12	966	Dopamine Agents;Cardiotonic Agents	Yes	No
Calcitonin Gene-Related Peptide	3.87e-12	937	Vasodilator Agents	Yes	No
Progesterone	3.87e-12	880	Progestins	Yes	No
Dexamethasone	3.87e-12	846	Antiemetics;Glucocorticoids;Anti-Inflammatory Agents;Antineoplastic Agents, Hormonal	Yes	No
Hydrogen Peroxide	3.87e-12	788	Anti-Infective Agents, Local;Oxidants	Yes	No
Manganese	3.87e-12	773	Trace Elements	Yes	No
Thrombin	3.87e-12	773	Hemostatics	Yes	No
Angiotensin Ii	3.87e-12	735	Vasoconstrictor Agents	Yes	No
Complement System Proteins	3.87e-12	694	Immunologic Factors	Yes	No
Immune Sera	3.87e-12	693	Immunologic Factors	Yes	No
Glycine	3.87e-12	670	Glycine Agents	Yes	No
Zinc	3.87e-12	654	Trace Elements	Yes	No
Iron	3.87e-12	642	Trace Elements	Yes	No
Enkephalins	3.87e-12	635	Neurotransmitter Agents	Yes	No
Antibodies, Bacterial	3.87e-12	604	Immunologic Factors	Yes	No
Antigen-Antibody Complex	3.87e-12	573	Immunologic Factors	Yes	No
Ethanol	3.87e-12	568	Anti-Infective Agents, Local;Solvents;Central Nervous System Depressants	Yes	No
Dinoprostone	3.87e-12	521	Oxytocics	Yes	No
Folic Acid	3.87e-12	506	Vitamin B Complex;Hematinics	Yes	No
Factor Viii	3.87e-12	504	Coagulants	Yes	No
Dactinomycin	3.87e-12	487	Antibiotics, Antineoplastic;Nucleic Acid Synthesis Inhibitors;Anti-Bacterial Agents;Protein Synthesis Inhibitors	Yes	No
Hydrocortisone	3.87e-12	487	Anti-Inflammatory Agents	Yes	No
Antibodies, Viral	3.87e-12	471	Immunologic Factors	Yes	No
Dinoprost	3.87e-12	446	Oxytocics;Abortifacient Agents, Nonsteroidal	Yes	No
Morphine	3.87e-12	444	Analgesics, Opioid;Narcotics	Yes	No
Isoproterenol	3.87e-12	439	Adrenergic beta-Agonists;Cardiotonic Agents;Sympathomimetics;Bronchodilator Agents	Yes	No
Camptothecin	3.87e-12	421	Antineoplastic Agents, Phytogenic;Enzyme Inhibitors	Yes	No
Tamoxifen	3.87e-12	412	Antineoplastic Agents, Hormonal;Selective Estrogen Receptor Modulators;Estrogen Antagonists;Bone Density Conservation Agents	Yes	No
Indomethacin	3.87e-12	354	Gout Suppressants;Cyclooxygenase Inhibitors;Anti-Inflammatory Agents, Non-Steroidal;Cardiovascular Agents;Tocolytic Agents	Yes	No
Tryptophan	3.87e-12	348	Antidepressive Agents, Second-Generation	Yes	No
Aspirin	3.87e-12	344	Anti-Inflammatory Agents, Non-Steroidal;Platelet Aggregation Inhibitors;Cyclooxygenase Inhibitors;Fibrinolytic Agents	Yes	No
Interleukin-4	3.87e-12	338	Antineoplastic Agents;Antirheumatic Agents;Adjuvants, Immunologic	Yes	No
Plasmin	3.87e-12	329	Fibrinolytic Agents	Yes	No
Carbachol	3.87e-12	327	Cardiotonic Agents;Analgesics, Non-Narcotic;Cholinergic Agonists;Miotics	Yes	No
Calcimycin	3.87e-12	325	Anti-Bacterial Agents;Ionophores	Yes	No
Cyclophosphamide	3.87e-12	324	Immunosuppressive Agents;Antirheumatic Agents;Myeloablative Agonists;Antineoplastic Agents, Alkylating;Mutagens	Yes	No
Egtazic Acid	3.87e-12	316	Chelating Agents;Antidotes	Yes	No
Enkephalin, Ala(2)-Mephe(4)-Gly(5)-	3.87e-12	314	Anti-Arrhythmia Agents;Analgesics, Opioid;Neurotransmitter Agents	Yes	No
Angiostatins	3.87e-12	308	Angiogenesis Inhibitors;Antineoplastic Agents	Yes	No
Naloxone	3.87e-12	301	Narcotic Antagonists	Yes	No
Genistein	3.87e-12	289	Antineoplastic Agents;Growth Inhibitors;Anticarcinogenic Agents;Enzyme Inhibitors	Yes	No
Acetylcysteine	3.87e-12	284	Expectorants;Antiviral Agents;Free Radical Scavengers	Yes	No
Somatostatin	3.87e-12	283	Hormones	Yes	No
Okadaic Acid	3.87e-12	282	Carcinogens;Ionophores;Enzyme Inhibitors	Yes	No
Muramidase	3.87e-12	273	Anti-Infective Agents	Yes	No
Bromodeoxyuridine	3.87e-12	272	Antimetabolites;Radiation-Sensitizing Agents;Antiviral Agents;Antimetabolites, Antineoplastic	Yes	No
Paclitaxel	3.87e-12	271	Tubulin Modulators;Antineoplastic Agents, Phytogenic	Yes	No
Alpha 1-Antichymotrypsin	3.87e-12	258	Serine Proteinase Inhibitors	Yes	No
Complement C4	3.87e-12	258	Immunologic Factors	Yes	No
Ascorbic Acid	3.87e-12	256	Antioxidants;Vitamins	Yes	No
Glucagon	3.87e-12	246	Hormones;Gastrointestinal Agents	Yes	No
Corticosterone	3.87e-12	237	Anti-Inflammatory Agents	Yes	No
Nocodazole	3.87e-12	233	Antineoplastic Agents	Yes	No
Rifampin	3.87e-12	229	Antibiotics, Antitubercular;Enzyme Inhibitors;Leprostatic Agents	Yes	No
Vincristine	3.87e-12	228	Tubulin Modulators;Antineoplastic Agents, Phytogenic	Yes	No
Fluorouracil	3.87e-12	227	Antimetabolites, Antineoplastic;Immunosuppressive Agents;Antimetabolites	Yes	No
Cytochalasin D	3.87e-12	226	Nucleic Acid Synthesis Inhibitors	Yes	No
Brefeldin A	3.87e-12	221	Antifungal Agents;Anti-Bacterial Agents;Protein Synthesis Inhibitors;Antiviral Agents	Yes	No
N-Methylaspartate	3.87e-12	212	Excitatory Amino Acid Agonists	Yes	No
Interferons	3.87e-12	204	Antineoplastic Agents;Antiviral Agents	Yes	No
Verapamil	3.87e-12	202	Anti-Arrhythmia Agents;Calcium Channel Blockers;Vasodilator Agents	Yes	No
Serpins	3.87e-12	201	Serine Proteinase Inhibitors	Yes	No
Leupeptins	3.87e-12	199	Protease Inhibitors	Yes	No
Phorbol Esters	3.87e-12	198	Carcinogens	Yes	No
Dihydrotestosterone	3.87e-12	195	Androgens	Yes	No
Binding Sites, Antibody	3.87e-12	194	Immunologic Factors	Yes	No
1-Methyl-3-Isobutylxanthine	3.87e-12	192	Phosphodiesterase Inhibitors	Yes	No
Cocaine	3.87e-12	189	Vasoconstrictor Agents;Dopamine Uptake Inhibitors;Anesthetics, Local	Yes	No
Levodopa	3.87e-12	188	Antiparkinson Agents;Dopamine Agents	Yes	No
Bleomycin	3.87e-12	187	Antibiotics, Antineoplastic	Yes	No
Pyridoxal Phosphate	3.87e-12	187	Vitamin B Complex	Yes	No
Vitamin B 12	3.87e-12	185	Vitamin B Complex	Yes	No
Cytarabine	3.87e-12	184	Antimetabolites, Antineoplastic;Immunosuppressive Agents;Antiviral Agents	Yes	No
Tetrodotoxin	3.87e-12	181	Poisons;Anesthetics, Local	Yes	No
Calcitonin	3.87e-12	180	Bone Density Conservation Agents	Yes	No
Ionomycin	3.87e-12	180	Ionophores	Yes	No
Epoprostenol	3.87e-12	179	Platelet Aggregation Inhibitors;Antihypertensive Agents	Yes	No
Colchicine	3.87e-12	177	Tubulin Modulators;Gout Suppressants	Yes	No
Deoxyglucose	3.87e-12	177	Antimetabolites;Antiviral Agents	Yes	No
Dimethyl Sulfoxide	3.87e-12	177	Solvents;Free Radical Scavengers;Analgesics, Non-Narcotic;Cryoprotective Agents	Yes	No
Nifedipine	3.87e-12	176	Calcium Channel Blockers;Tocolytic Agents;Vasodilator Agents	Yes	No
Capsaicin	3.87e-12	175	Analgesics, Non-Narcotic	Yes	No
Thioctic Acid	3.87e-12	168	Vitamin B Complex;Antioxidants	Yes	No
Antibodies, Anti-Idiotypic	3.87e-12	157	Immunologic Factors	Yes	No
Isoantibodies	3.87e-12	154	Immunologic Factors	Yes	No
Cholecystokinin	3.87e-12	153	Cholagogues and Choleretics	Yes	No
Endorphins	3.87e-12	153	Neurotransmitter Agents	Yes	No
Halothane	3.87e-12	152	Anesthetics, Inhalation	Yes	No
Naltrexone	3.87e-12	151	Narcotic Antagonists	Yes	No
Octreotide	3.87e-12	151	Antineoplastic Agents, Hormonal;Gastrointestinal Agents	Yes	No
Theophylline	3.87e-12	144	Bronchodilator Agents;Phosphodiesterase Inhibitors;Vasodilator Agents	Yes	No
Kininogens	3.87e-12	138	Cysteine Proteinase Inhibitors	Yes	No
Thromboplastin	3.87e-12	138	Hemostatics	Yes	No
Benzoates	3.87e-12	137	Anti-Infective Agents;Antifungal Agents	Yes	No
Ethylmaleimide	3.87e-12	132	Enzyme Inhibitors;Sulfhydryl Reagents	Yes	No
Gadolinium Dtpa	3.87e-12	132	Contrast Media	Yes	No
Tetrahydrofolates	3.87e-12	131	Vitamin B Complex	Yes	No
Enkephalin, Leucine	3.87e-12	129	Neurotransmitter Agents	Yes	No
Prazosin	3.87e-12	129	Adrenergic alpha-Antagonists;Antihypertensive Agents	Yes	No
Nickel	3.87e-12	128	Trace Elements	Yes	No
Phorbol 12,13-Dibutyrate	3.87e-12	128	Carcinogens	Yes	No
Tunicamycin	3.87e-12	126	Anti-Bacterial Agents;Antiviral Agents	Yes	No
Coumarins	3.87e-12	125	Anticoagulants;Antineoplastic Agents;Indicators and Reagents	Yes	No
Methyl Methanesulfonate	3.87e-12	123	Mutagens;Antineoplastic Agents, Alkylating	Yes	No
Prednisone	3.87e-12	121	Glucocorticoids;Anti-Inflammatory Agents;Antineoplastic Agents, Hormonal	Yes	No
Mifepristone	3.87e-12	120	Contraceptives, Oral, Synthetic;Menstruation-Inducing Agents;Luteolytic Agents;Hormone Antagonists;Contraceptives, Postcoital, Synthetic;Abortifacient Agents, Steroidal	Yes	No
Complement Factor B	3.87e-12	119	Immunologic Factors	Yes	No
Apomorphine	3.87e-12	117	Antiparkinson Agents;Dopamine Agonists	Yes	No
Scopolamine	3.87e-12	115	Mydriatics;Muscarinic Antagonists;Adjuvants, Anesthesia	Yes	No
Bicuculline	3.87e-12	114	Convulsants;GABA Antagonists	Yes	No
Alprostadil	3.87e-12	113	Fibrinolytic Agents;Vasodilator Agents;Platelet Aggregation Inhibitors	Yes	No
Selenium	3.87e-12	112	Trace Elements;Antioxidants	Yes	No
Valproic Acid	3.87e-12	111	Antimanic Agents;Anticonvulsants;GABA Agents;Enzyme Inhibitors	Yes	No
Pyridoxine	3.87e-12	108	Vitamin B Complex	Yes	No
Enalapril	3.87e-12	107	Angiotensin-Converting Enzyme Inhibitors;Antihypertensive Agents	Yes	No
Pentetic Acid	3.87e-12	105	Chelating Agents;Antidotes;Iron Chelating Agents	Yes	No
Tyrphostins	3.87e-12	103	Antineoplastic Agents;Enzyme Inhibitors	Yes	No
Yohimbine	3.87e-12	103	Adrenergic alpha-Antagonists;Mydriatics	Yes	No
Doxycycline	3.87e-12	99	Anti-Bacterial Agents;Antimalarials	Yes	No
Bombesin	3.87e-12	98	Neurotransmitter Agents	Yes	No
Iodine	3.87e-12	98	Anti-Infective Agents, Local;Trace Elements	Yes	No
Lovastatin	3.87e-12	98	Anticholesteremic Agents;Antineoplastic Agents;Hydroxymethylglutaryl-CoA Reductase Inhibitors	Yes	No
Ferric Compounds	3.87e-12	97	Hematinics	Yes	No
Fluoxetine	3.87e-12	95	Serotonin Uptake Inhibitors;Antidepressive Agents, Second-Generation	Yes	No
Fructose	3.87e-12	91	Sweetening Agents	Yes	No
Inositol	3.87e-12	90	Vitamin B Complex	Yes	No
Pepsin A	3.87e-12	90	Gastrointestinal Agents	Yes	No
Rhodamines	3.87e-12	90	Fluorescent Dyes;Indicators and Reagents	Yes	No
Physostigmine	3.87e-12	89	Cholinesterase Inhibitors;Miotics	Yes	No
Antiplasmin	3.87e-12	88	Antifibrinolytic Agents;Serine Proteinase Inhibitors	Yes	No
Complement C1Q	3.87e-12	87	Immunologic Factors	Yes	No
Ketanserin	3.87e-12	87	Antihypertensive Agents;Platelet Aggregation Inhibitors;Serotonin Antagonists	Yes	No
Streptozocin	3.87e-12	85	Antibiotics, Antineoplastic	Yes	No
Daunorubicin	3.87e-12	84	Antibiotics, Antineoplastic	Yes	No
Antibodies, Antiphospholipid	3.87e-12	82	Immunologic Factors	Yes	No
Antibodies, Blocking	3.87e-12	80	Immunologic Factors	Yes	No
Cholic Acids	3.87e-12	79	Gastrointestinal Agents	Yes	No
Immunoglobulin Fragments	3.87e-12	78	Immunologic Factors	Yes	No
Anisomycin	3.87e-12	76	Anti-Bacterial Agents;Protein Synthesis Inhibitors;Antiprotozoal Agents;Nucleic Acid Synthesis Inhibitors	Yes	No
Immunoglobulin Kappa-Chains	3.87e-12	76	Immunologic Factors	Yes	No
Antigens, Cd59	3.87e-12	75	Complement Inactivating Agents	Yes	No
Losartan	3.87e-12	74	Anti-Arrhythmia Agents;Angiotensin II Type 1 Receptor Blockers;Antihypertensive Agents	Yes	No
Dynorphins	3.87e-12	73	Neurotransmitter Agents	Yes	No
Immunoglobulin Allotypes	3.87e-12	73	Immunologic Factors	Yes	No
Methanol	3.87e-12	72	Solvents	Yes	No
Silicon	3.87e-12	72	Trace Elements	Yes	No
Muscimol	3.87e-12	71	GABA Agonists	Yes	No
Chlorpromazine	3.87e-12	69	Antiemetics;Antipsychotic Agents;Dopamine Antagonists	Yes	No
Suramin	3.87e-12	69	Antinematodal Agents;Antineoplastic Agents;Trypanocidal Agents	Yes	No
Complement C5A	3.87e-12	67	Immunologic Factors	Yes	No
Deferoxamine	3.87e-12	67	Siderophores	Yes	No
Immunoglobulin Fc Fragments	3.87e-12	67	Immunologic Factors	Yes	No
Sorbitol	3.87e-12	67	Cathartics;Indicators and Reagents;Sweetening Agents	Yes	No
Secretin	3.87e-12	66	Gastrointestinal Agents;Hormones	Yes	No
Immunoglobulin Light Chains	3.87e-12	64	Immunologic Factors	Yes	No
Phalloidine	3.87e-12	64	Poisons	Yes	No
Tachykinins	3.87e-12	64	Neurotransmitter Agents	Yes	No
Picrotoxin	3.87e-12	63	Central Nervous System Stimulants;Antidotes;Convulsants;GABA Antagonists	Yes	No
Opioid Peptides	3.87e-12	62	Neurotransmitter Agents	Yes	No
Baclofen	3.87e-12	61	Muscle Relaxants, Central;GABA Agonists	Yes	No
Kaolin	3.87e-12	61	Antidiarrheals	Yes	No
Pindolol	3.87e-12	61	Adrenergic beta-Antagonists;Vasodilator Agents;Serotonin Antagonists;Antihypertensive Agents	Yes	No
Beta Carotene	3.87e-12	59	Vitamins	Yes	No
Chlorine	3.87e-12	59	Chemical Warfare Agents	Yes	No
Curcumin	3.87e-12	58	Anti-Inflammatory Agents, Non-Steroidal;Antineoplastic Agents;Coloring Agents;Enzyme Inhibitors	Yes	No
Ethidium	3.87e-12	58	Enzyme Inhibitors;Fluorescent Dyes;Trypanocidal Agents;Indicators and Reagents;Nicotinic Antagonists	Yes	No
Dimyristoylphosphatidylcholine	3.87e-12	56	Indicators and Reagents	Yes	No
Dithionitrobenzoic Acid	3.87e-12	56	Sulfhydryl Reagents	Yes	No
Complement C4B	3.87e-12	54	Immunologic Factors	Yes	No
Pentylenetetrazole	3.87e-12	54	Convulsants;GABA Antagonists	Yes	No
Pentoxifylline	3.87e-12	53	Enzyme Inhibitors;Hematologic Agents;Phosphodiesterase Inhibitors;Free Radical Scavengers;Vasodilator Agents;Radiation-Protective Agents;Platelet Aggregation Inhibitors	Yes	No
Pirenzepine	3.87e-12	53	Muscarinic Antagonists;Anti-Ulcer Agents	Yes	No
Complement C3D	3.87e-12	52	Immunologic Factors	Yes	No
Mitomycins	3.87e-12	50	Antibiotics, Antineoplastic	Yes	No
Quinacrine	3.87e-12	50	Anticestodal Agents;Antinematodal Agents;Antimalarials;Enzyme Inhibitors;Antineoplastic Agents	Yes	No
Pituitary Adenylate Cyclase-Activating Polypeptide	3.87e-12	48	Vasodilator Agents;Growth Substances;Neurotransmitter Agents	Yes	No
Fenfluramine	3.87e-12	47	Serotonin Agents;Serotonin Uptake Inhibitors	Yes	No
Methylphenidate	3.87e-12	47	Central Nervous System Stimulants;Adrenergic Uptake Inhibitors;Sympathomimetics;Dopamine Uptake Inhibitors;Adrenergic Agents;Dopamine Agents	Yes	No
Nordihydroguaiaretic Acid	3.87e-12	44	Antioxidants;Keratolytic Agents;Cyclooxygenase Inhibitors;Lipoxygenase Inhibitors	Yes	No
Erythromycin	3.87e-12	42	Gastrointestinal Agents;Anti-Bacterial Agents;Protein Synthesis Inhibitors	Yes	No
Kynurenic Acid	3.87e-12	42	Excitatory Amino Acid Antagonists	Yes	No
Lisinopril	3.87e-12	42	Angiotensin-Converting Enzyme Inhibitors;Cardiotonic Agents;Antihypertensive Agents	Yes	No
Ruthenium Red	3.87e-12	42	Coloring Agents;Indicators and Reagents	Yes	No
Interferon Type I, Recombinant	3.87e-12	41	Antineoplastic Agents;Antiviral Agents;Angiogenesis Inhibitors	Yes	No
Disintegrins	3.87e-12	40	Platelet Aggregation Inhibitors	Yes	No
Paraoxon	3.87e-12	40	Cholinesterase Inhibitors;Insecticides	Yes	No
Ricin	3.87e-12	39	Chemical Warfare Agents	Yes	No
Rifamycins	3.87e-12	38	Anti-Bacterial Agents	Yes	No
Antimicrobial Cationic Peptides	3.87e-12	37	Anti-Infective Agents;Antifungal Agents	Yes	No
Flunitrazepam	3.87e-12	37	GABA Modulators;Anti-Anxiety Agents	Yes	No
Immunotoxins	3.87e-12	37	Immunologic Factors	Yes	No
Spiperone	3.87e-12	37	Antipsychotic Agents;Dopamine Antagonists	Yes	No
Carmustine	3.87e-12	36	Antineoplastic Agents, Alkylating	Yes	No
Poly I-C	3.87e-12	34	Antiviral Agents;Interferon Inducers	Yes	No
Thiamine Pyrophosphate	3.87e-12	34	Vitamin B Complex	Yes	No
Phenol	3.87e-12	33	Anti-Infective Agents, Local;Sclerosing Solutions;Disinfectants	Yes	No
Pimozide	3.87e-12	33	Antipsychotic Agents;Anti-Dyskinesia Agents;Dopamine Antagonists	Yes	No
Buspirone	3.87e-12	32	Serotonin Agonists;Anti-Anxiety Agents	Yes	No
Pentosan Sulfuric Polyester	3.87e-12	32	Anti-Inflammatory Agents, Non-Steroidal;Enzyme Inhibitors;Anticoagulants	Yes	No
Eosinophil Granule Proteins	3.87e-12	31	Immunologic Factors	Yes	No
Phenylmethylsulfonyl Fluoride	3.87e-12	30	Enzyme Inhibitors;Protease Inhibitors	Yes	No
Raloxifene	3.87e-12	30	Selective Estrogen Receptor Modulators;Estrogen Antagonists;Bone Density Conservation Agents	Yes	No
Pepstatins	3.87e-12	29	Protease Inhibitors	Yes	No
Fenclonine	3.87e-12	28	Enzyme Inhibitors;Serotonin Antagonists	Yes	No
Lactams	3.87e-12	28	Anti-Bacterial Agents	Yes	No
Polysorbates	3.87e-12	28	Excipients;Surface-Active Agents	Yes	No
Ramipril	3.87e-12	27	Angiotensin-Converting Enzyme Inhibitors;Antihypertensive Agents	Yes	No
Rgs Proteins	3.87e-12	27	GTP Phosphohydrolase Activators	Yes	No
5,7-Dihydroxytryptamine	3.87e-12	26	Serotonin Agents	Yes	No
Carbonyl Cyanide M-Chlorophenyl Hydrazone	3.87e-12	26	Ionophores;Uncoupling Agents	Yes	No
Hypochlorous Acid	3.87e-12	25	Oxidants	Yes	No
Fluvoxamine	3.87e-12	24	Anti-Anxiety Agents;Serotonin Uptake Inhibitors;Antidepressive Agents, Second-Generation	Yes	No
Omega-Conotoxin Gvia	3.87e-12	24	Neurotoxins;Calcium Channel Blockers	Yes	No
Trypsin Inhibitor, Kunitz Soybean	3.87e-12	24	Trypsin Inhibitors	Yes	No
Carbidopa	3.87e-12	23	Antiparkinson Agents;Dopamine Agents;Enzyme Inhibitors	Yes	No
Cortisone	3.87e-12	23	Anti-Inflammatory Agents	Yes	No
Ibotenic Acid	3.87e-12	23	Excitatory Amino Acid Agonists	Yes	No
Soman	3.87e-12	23	Chemical Warfare Agents;Convulsants;Cholinesterase Inhibitors	Yes	No
Clofibric Acid	3.87e-12	22	Anticholesteremic Agents;Antilipemic Agents	Yes	No
Dantrolene	3.87e-12	22	Muscle Relaxants, Central	Yes	No
Salicylates	3.87e-12	22	Anti-Inflammatory Agents, Non-Steroidal;Cyclooxygenase Inhibitors	Yes	No
Bisbenzimide	3.87e-12	21	Filaricides;Fluorescent Dyes	Yes	No
Cystamine	3.87e-12	21	Enzyme Inhibitors;Radiation-Protective Agents;Sulfhydryl Reagents	Yes	No
Dietary Sucrose	3.87e-12	21	Sweetening Agents	Yes	No
Procaine	3.87e-12	21	Anesthetics, Local	Yes	No
S-Nitroso-N-Acetylpenicillamine	3.87e-12	20	Enzyme Inhibitors;Vasodilator Agents;Nitric Oxide Donors	Yes	No
Silymarin	3.87e-12	20	Antioxidants;Protective Agents	Yes	No
Tin	3.87e-12	19	Trace Elements	Yes	No
Heroin	3.87e-12	18	Analgesics, Opioid;Narcotics	Yes	No
Thiopental	3.87e-12	18	Anticonvulsants;Hypnotics and Sedatives;GABA Modulators;Anesthetics, Intravenous	Yes	No
Xenon	3.87e-12	16	Anesthetics, Inhalation	Yes	No
Hemicholinium 3	3.87e-12	15	Neurotransmitter Uptake Inhibitors;Cholinergic Agents	Yes	No
Distamycins	3.87e-12	14	Anti-Bacterial Agents;Nucleic Acid Synthesis Inhibitors	Yes	No
2-Aminoadipic Acid	3.87e-12	13	Excitatory Amino Acid Antagonists	Yes	No
Tocopherols	3.87e-12	13	Vitamins;Antioxidants	Yes	No
Vitamin K 3	3.87e-12	10	Antifibrinolytic Agents;Vitamins	Yes	No
Norfenfluramine	3.87e-12	7	Serotonin Uptake Inhibitors;Serotonin Agents	Yes	No
Complement C1 Inhibitor Protein	3.87e-12	6	Complement Inactivating Agents	Yes	No
Conotoxins	3.87e-12	5	Neurotoxins;Calcium Channel Blockers	Yes	No
Omega-Conotoxins	3.87e-12	3	Neurotoxins;Calcium Channel Blockers	Yes	No
Hydroxychloroquine	3.87e-12	1	Antimalarials;Enzyme Inhibitors;Antirheumatic Agents;Dermatologic Agents	Yes	No
Enkephalin, D-Penicillamine (2,5)-	3.87e-12	531	Neurotransmitter Agents;Analgesics, Opioid	No	No
Tissue Inhibitor Of Metalloproteinase-2	3.87e-12	301	Protease Inhibitors;Antineoplastic Agents	No	No
Immunoglobulin E	3.87e-12	272	Immunologic Factors	No	No
Complement C8	3.87e-12	228	Immunologic Factors	No	No
Pancreatic Polypeptide	3.87e-12	220	Hormones;Gastrointestinal Agents	No	No
Coal Tar	3.87e-12	209	Keratolytic Agents	No	No
Diethylstilbestrol	3.87e-12	195	Estrogens, Non-Steroidal;Antineoplastic Agents, Hormonal;Carcinogens	No	No
Plasminogen Activator Inhibitor 2	3.87e-12	161	Serine Proteinase Inhibitors	No	No
Foscarnet	3.87e-12	159	Antiviral Agents;Reverse Transcriptase Inhibitors	No	No
Hydroxyurea	3.87e-12	144	Antineoplastic Agents;Antisickling Agents;Enzyme Inhibitors;Nucleic Acid Synthesis Inhibitors	No	No
Interferon Type I	3.87e-12	130	Antiviral Agents;Antineoplastic Agents	No	No
Indoleacetic Acids	3.87e-12	116	Plant Growth Regulators	No	No
Tubercidin	3.87e-12	106	Antibiotics, Antineoplastic;Antimetabolites, Antineoplastic	No	No
Complement C3-C5 Convertases	3.87e-12	104	Immunologic Factors	No	No
Immunoglobulins, Thyroid-Stimulating	3.87e-12	104	Immunologic Factors	No	No
Botulinum Toxins	3.87e-12	98	Anti-Dyskinesia Agents;Poisons	No	No
Phentolamine	3.87e-12	97	Antihypertensive Agents;Adrenergic alpha-Antagonists	No	No
Amiloride	3.87e-12	96	Sodium Channel Blockers;Diuretics	No	No
Chloramphenicol	3.87e-12	91	Anti-Bacterial Agents;Protein Synthesis Inhibitors	No	No
Complement Activating Enzymes	3.87e-12	78	Immunologic Factors	No	No
Amanitins	3.87e-12	77	Enzyme Inhibitors;Poisons;Nucleic Acid Synthesis Inhibitors	No	No
Dobutamine	3.87e-12	75	Cardiotonic Agents;Adrenergic beta-Agonists;Sympathomimetics	No	No
Complement C2	3.87e-12	72	Immunologic Factors	No	No
Propofol	3.87e-12	72	Anticonvulsants;Hypnotics and Sedatives;Free Radical Scavengers;Anesthetics, Intravenous;Antiemetics	No	No
Cholecalciferol	3.87e-12	68	Vitamins;Bone Density Conservation Agents	No	No
Agar	3.87e-12	67	Culture Media	No	No
Neurokinin A	3.87e-12	67	Neurotransmitter Agents	No	No
Immunoglobulin A, Secretory	3.87e-12	66	Immunologic Factors	No	No
Digitonin	3.87e-12	65	Indicators and Reagents	No	No
Cytokinins	3.87e-12	64	Plant Growth Regulators	No	No
Diltiazem	3.87e-12	63	Antihypertensive Agents;Vasodilator Agents;Cardiovascular Agents;Calcium Channel Blockers	No	No
Properdin	3.87e-12	63	Immunologic Factors	No	No
Immunoglobulin Idiotypes	3.87e-12	60	Immunologic Factors	No	No
Sulfur Dioxide	3.87e-12	60	Air Pollutants	No	No
Antibodies, Helminth	3.87e-12	58	Immunologic Factors	No	No
4-Butyrolactone	3.87e-12	57	Solvents	No	No
Leucovorin	3.87e-12	57	Vitamin B Complex	No	No
Paraquat	3.87e-12	57	Herbicides	No	No
Aminooxyacetic Acid	3.87e-12	56	Enzyme Inhibitors;GABA Agents	No	No
Ethyl Methanesulfonate	3.87e-12	54	Mutagens;Antineoplastic Agents, Alkylating	No	No
Molybdenum	3.87e-12	54	Trace Elements	No	No
Topotecan	3.87e-12	53	Antineoplastic Agents;Enzyme Inhibitors	No	No
Hepatitis C Antibodies	3.87e-12	51	Immunologic Factors	No	No
Dextran Sulfate	3.87e-12	48	Anticoagulants;Indicators and Reagents;Antiviral Agents;Plasma Substitutes	No	No
Ritanserin	3.87e-12	47	Serotonin Antagonists;Antipsychotic Agents;Antidepressive Agents, Second-Generation;Anti-Anxiety Agents	No	No
Dichlororibofuranosylbenzimidazole	3.87e-12	46	Enzyme Inhibitors;Nucleic Acid Synthesis Inhibitors	No	No
Hexamethonium Compounds	3.87e-12	46	Antihypertensive Agents;Ganglionic Blockers	No	No
Teniposide	3.87e-12	45	Enzyme Inhibitors;Antineoplastic Agents;Nucleic Acid Synthesis Inhibitors	No	No
Methylnitrosourea	3.87e-12	44	Alkylating Agents	No	No
Taurocholic Acid	3.87e-12	44	Cholagogues and Choleretics;Detergents	No	No
Amsacrine	3.87e-12	43	Intercalating Agents;Antineoplastic Agents	No	No
Immunoglobulin Mu-Chains	3.87e-12	42	Immunologic Factors	No	No
Nitrogen Dioxide	3.87e-12	42	Oxidants, Photochemical	No	No
Pentostatin	3.87e-12	42	Enzyme Inhibitors;Immunosuppressive Agents;Antibiotics, Antineoplastic	No	No
Azathioprine	3.87e-12	41	Antimetabolites;Antirheumatic Agents;Antimetabolites, Antineoplastic;Immunosuppressive Agents	No	No
Saralasin	3.87e-12	41	Angiotensin-Converting Enzyme Inhibitors;Antihypertensive Agents;Angiotensin II Type 1 Receptor Blockers	No	No
Complement C3 Nephritic Factor	3.87e-12	40	Complement Inactivating Agents;Immunologic Factors	No	No
6-Aminocaproic Acid	3.87e-12	39	Antifibrinolytic Agents	No	No
Acetone	3.87e-12	39	Solvents	No	No
Enflurane	3.87e-12	39	Anesthetics, Inhalation	No	No
2-Aminopurine	3.87e-12	38	Antimetabolites	No	No
Asparaginase	3.87e-12	38	Antineoplastic Agents	No	No
Leucomycins	3.87e-12	37	Anti-Bacterial Agents	No	No
Gasoline	3.87e-12	36	Air Pollutants;Carcinogens, Environmental	No	No
Procetofen	3.87e-12	36	Antilipemic Agents	No	No
Mitoxantrone	3.87e-12	35	Antineoplastic Agents;Analgesics	No	No
Aroclors	3.87e-12	34	Environmental Pollutants	No	No
Cyclin-Dependent Kinase Inhibitor P19	3.87e-12	34	Protein Kinase Inhibitors	No	No
Isosorbide Dinitrate	3.87e-12	34	Vasodilator Agents;Nitric Oxide Donors	No	No
Vitamin K 2	3.87e-12	34	Vitamins;Antifibrinolytic Agents	No	No
Wheat Germ Agglutinin-Horseradish Peroxidase Conjugate	3.87e-12	33	Molecular Probes	No	No
Buserelin	3.87e-12	32	Fertility Agents, Female	No	No
Gemfibrozil	3.87e-12	32	Antilipemic Agents	No	No
Rifabutin	3.87e-12	32	Anti-Bacterial Agents;Antibiotics, Antitubercular	No	No
Azoxymethane	3.87e-12	30	Carcinogens	No	No
Ampicillin	3.87e-12	29	Anti-Bacterial Agents	No	No
Methoxamine	3.87e-12	29	Adrenergic alpha-Agonists;Sympathomimetics;Vasoconstrictor Agents	No	No
Podophyllotoxin	3.87e-12	29	Keratolytic Agents;Antineoplastic Agents, Phytogenic;Tubulin Modulators	No	No
Devazepide	3.87e-12	28	Hormone Antagonists	No	No
Succinic Acid	3.87e-12	28	Anti-Ulcer Agents;Radiation-Protective Agents	No	No
Bupivacaine	3.87e-12	27	Anesthetics, Local	No	No
Pyridoxamine	3.87e-12	27	Vitamin B Complex	No	No
Trichothecenes	3.87e-12	27	Poisons	No	No
Ethylketocyclazocine	3.87e-12	26	Analgesics, Opioid	No	No
Fadrozole	3.87e-12	26	Aromatase Inhibitors;Antineoplastic Agents, Hormonal;Estrogen Antagonists	No	No
Puromycin Aminonucleoside	3.87e-12	25	Antibiotics, Antineoplastic;Antimetabolites, Antineoplastic	No	No
Immunoglobulin Constant Regions	3.87e-12	24	Immunologic Factors	No	No
Perindopril	3.87e-12	24	Angiotensin-Converting Enzyme Inhibitors;Antihypertensive Agents	No	No
4-Aminobenzoic Acid	3.87e-12	23	Vitamin B Complex	No	No
Chlorpyrifos	3.87e-12	23	Cholinesterase Inhibitors;Insecticides	No	No
Nicorandil	3.87e-12	23	Anti-Arrhythmia Agents;Antihypertensive Agents;Vasodilator Agents;Vitamin B Complex	No	No
3-Hydroxyanthranilic Acid	3.87e-12	22	Free Radical Scavengers	No	No
Gibberellins	3.87e-12	22	Plant Growth Regulators	No	No
Vecuronium Bromide	3.87e-12	22	Neuromuscular Nondepolarizing Agents;Nicotinic Antagonists	No	No
Pyridoxal	3.87e-12	21	Vitamin B Complex	No	No
Bezafibrate	3.87e-12	20	Antilipemic Agents	No	No
Diprenorphine	3.87e-12	20	Narcotic Antagonists	No	No
Hexachlorobenzene	3.87e-12	20	Fungicides, Industrial	No	No
Hygromycin B	3.87e-12	20	Anti-Bacterial Agents;Anthelmintics	No	No
Pinacidil	3.87e-12	20	Antihypertensive Agents;Vasodilator Agents	No	No
Azaserine	3.87e-12	19	Antibiotics, Antineoplastic;Antimetabolites, Antineoplastic;Immunosuppressive Agents;Antibiotics, Antifungal	No	No
Clenbuterol	3.87e-12	19	Adrenergic beta-Agonists;Bronchodilator Agents;Sympathomimetics	No	No
Cyclazocine	3.87e-12	19	Narcotic Antagonists;Analgesics, Non-Narcotic	No	No
Hymecromone	3.87e-12	19	Indicators and Reagents;Parasympatholytics	No	No
Iodoacetic Acid	3.87e-12	19	Enzyme Inhibitors	No	No
Pulmonary Surfactant-Associated Protein A	3.87e-12	19	Pulmonary Surfactants	No	No
Gallopamil	3.87e-12	18	Calcium Channel Blockers	No	No
Zinostatin	3.87e-12	18	Cytotoxins;Nucleic Acid Synthesis Inhibitors;Antibiotics, Antineoplastic	No	No
3-Mercaptopropionic Acid	3.87e-12	17	Convulsants;GABA Agents;Enzyme Inhibitors	No	No
Dideoxyadenosine	3.87e-12	17	Antiviral Agents;Antimetabolites	No	No
Formycins	3.87e-12	17	Antibiotics, Antineoplastic	No	No
Aclarubicin	3.87e-12	15	Antibiotics, Antineoplastic	No	No
Cefotaxime	3.87e-12	15	Anti-Bacterial Agents	No	No
Iodocyanopindolol	3.87e-12	15	Adrenergic beta-Antagonists	No	No
Methadone	3.87e-12	15	Antitussive Agents;Analgesics, Opioid;Narcotics	No	No
Plicamycin	3.87e-12	15	Nucleic Acid Synthesis Inhibitors;Antibiotics, Antineoplastic;Protein Synthesis Inhibitors;Fluorescent Dyes	No	No
Teriparatide	3.87e-12	15	Bone Density Conservation Agents	No	No
Acenocoumarol	3.87e-12	14	Anticoagulants	No	No
Teprotide	3.87e-12	14	Angiotensin-Converting Enzyme Inhibitors;Antihypertensive Agents	No	No
Amiodarone	3.87e-12	13	Anti-Arrhythmia Agents;Enzyme Inhibitors;Vasodilator Agents	No	No
Azaguanine	3.87e-12	13	Antimetabolites, Antineoplastic	No	No
Butorphanol	3.87e-12	13	Analgesics, Opioid;Antitussive Agents;Narcotics;Narcotic Antagonists	No	No
Dalteparin	3.87e-12	13	Fibrinolytic Agents;Anticoagulants	No	No
Diminazene	3.87e-12	13	Trypanocidal Agents	No	No
P-Chloromercuribenzoic Acid	3.87e-12	13	Sulfhydryl Reagents	No	No
Phenylbutazone	3.87e-12	13	Anti-Inflammatory Agents, Non-Steroidal	No	No
Temefos	3.87e-12	13	Insecticides	No	No
Tetranitromethane	3.87e-12	13	Indicators and Reagents;Oxidants;Explosive Agents;Chemical Warfare Agents	No	No
Cyclin-Dependent Kinase Inhibitor Proteins	3.87e-12	12	Protein Kinase Inhibitors	No	No
Ficusin	3.87e-12	12	Cross-Linking Reagents;Anthelmintics;Photosensitizing Agents	No	No
Phenylethyl Alcohol	3.87e-12	12	Anti-Infective Agents, Local;Disinfectants;Preservatives, Pharmaceutical	No	No
Coagulase	3.87e-12	11	Coagulants	No	No
Immunoglobulin Alpha-Chains	3.87e-12	11	Immunologic Factors	No	No
Swainsonine	3.87e-12	11	Adjuvants, Immunologic;Antineoplastic Agents, Phytogenic;Enzyme Inhibitors	No	No
Trichosanthin	3.87e-12	11	Abortifacient Agents, Nonsteroidal;Antineoplastic Agents, Phytogenic;Anti-HIV Agents	No	No
2,6-Dichloroindophenol	3.87e-12	10	Indicators and Reagents	No	No
Aurodox	3.87e-12	10	Anti-Bacterial Agents	No	No
Clindamycin	3.87e-12	10	Anti-Bacterial Agents	No	No
Complement C5A, Des-Arginine	3.87e-12	10	Immunologic Factors	No	No
Eosinophil-Derived Neurotoxin	3.87e-12	10	Immunologic Factors	No	No
Mannose-Binding Protein-Associated Serine Proteases	3.87e-12	10	Immunologic Factors	No	No
Diatrizoate	3.87e-12	9	Contrast Media	No	No
Flurothyl	3.87e-12	9	Convulsants	No	No
Immunoglobulin Gm Allotypes	3.87e-12	9	Immunologic Factors	No	No
Nogalamycin	3.87e-12	9	Nucleic Acid Synthesis Inhibitors;Antibiotics, Antineoplastic;Intercalating Agents	No	No
Antibodies, Phospho-Specific	3.87e-12	8	Immunologic Factors	No	No
Ethylene Oxide	3.87e-12	8	Disinfectants	No	No
Meperidine	3.87e-12	8	Analgesics, Opioid;Adjuvants, Anesthesia;Narcotics	No	No
Triamcinolone	3.87e-12	8	Anti-Inflammatory Agents;Glucocorticoids	No	No
Trimethoprim-Sulfamethoxazole Combination	3.87e-12	8	Anti-Infective Agents, Urinary;Antimalarials;Anti-Infective Agents	No	No
Cacodylic Acid	3.87e-12	7	Herbicides	No	No
Methylmethacrylate	3.87e-12	7	Vasodilator Agents;Antimutagenic Agents	No	No
Polymyxins	3.87e-12	7	Anti-Bacterial Agents	No	No
Psoralens	3.87e-12	7	Dermatologic Agents;Photosensitizing Agents	No	No
Chloralose	3.87e-12	6	Hypnotics and Sedatives;Anesthetics, Intravenous	No	No
Immunoglobulin Epsilon-Chains	3.87e-12	6	Immunologic Factors	No	No
Sulfanilamides	3.87e-12	6	Anti-Infective Agents	No	No
Tyrocidine	3.87e-12	6	Anti-Infective Agents, Local;Anti-Bacterial Agents	No	No
Zinc Oxide	3.87e-12	6	Dermatologic Agents;Sunscreening Agents	No	No
Ergotamine	3.87e-12	4	Adrenergic alpha-Agonists;Vasoconstrictor Agents;Analgesics, Non-Narcotic	No	No
Antitoxins	3.87e-12	3	Immunologic Factors	No	No
Cloxacillin	3.87e-12	3	Anti-Bacterial Agents	No	No
Iproniazid	3.87e-12	3	Antidepressive Agents;Monoamine Oxidase Inhibitors;Antitubercular Agents	No	No
Penicillin V	3.87e-12	3	Anti-Bacterial Agents	No	No
Thiouracil	3.87e-12	3	Antithyroid Agents;Vasodilator Agents	No	No
Digitoxin	3.87e-12	2	Cardiotonic Agents;Anti-Arrhythmia Agents;Enzyme Inhibitors	No	No
Opium	3.87e-12	2	Antidiarrheals;Analgesics, Opioid;Antitussive Agents;Narcotics	No	No
Reagins	3.87e-12	2	Immunologic Factors	No	No
Sulbactam	3.87e-12	2	Enzyme Inhibitors;Anti-Bacterial Agents	No	No
Sulfadiazine	3.87e-12	2	Anti-Infective Agents;Coccidiostats;Antiprotozoal Agents	No	No
Aztreonam	3.87e-12	1	Anti-Bacterial Agents	No	No
Chlorpropamide	3.87e-12	1	Hypoglycemic Agents	No	No
Minoxidil	3.87e-12	1	Antihypertensive Agents;Vasodilator Agents	No	No
Nalorphine	3.87e-12	1	Narcotic Antagonists	No	No
Propoxyphene	3.87e-12	1	Analgesics, Opioid;Narcotics;Antitussive Agents	No	No
Sulfathiazoles	3.87e-12	1	Anti-Infective Agents	No	No
Thiotepa	3.89e-12	6	Myeloablative Agonists;Antineoplastic Agents, Alkylating	No	No
Clofibrate	3.91e-12	44	Anticholesteremic Agents;Antilipemic Agents	No	No
Leukotriene Antagonists	3.91e-12	22	Anti-Asthmatic Agents	No	No
Alamethicin	3.93e-12	10	Ionophores;Uncoupling Agents;Anti-Bacterial Agents	No	No
Aminoglutethimide	3.94e-12	19	Antineoplastic Agents, Hormonal;Aromatase Inhibitors;Adrenergic Agents	No	No
Cyproterone Acetate	3.96e-12	29	Androgen Antagonists;Contraceptive Agents, Male;Antineoplastic Agents	No	No
Meprobamate	4.01e-12	5	Anticonvulsants;Anti-Anxiety Agents;Hypnotics and Sedatives;Muscle Relaxants, Central	No	No
Technetium Tc 99M Sulfur Colloid	4.02e-12	15	Radiopharmaceuticals	No	No
Hexobarbital	4.02e-12	6	Hypnotics and Sedatives;GABA Modulators	No	No
Fentanyl	4.06e-12	92	Analgesics, Opioid;Adjuvants, Anesthesia;Anesthetics, Intravenous;Narcotics	No	No
Insulin, Long-Acting	4.08e-12	11	Hypoglycemic Agents	No	No
Amphotericin B	4.09e-12	47	Amebicides;Antifungal Agents;Antiprotozoal Agents;Anti-Bacterial Agents	No	No
Metronidazole	4.09e-12	31	Radiation-Sensitizing Agents;Anti-Infective Agents;Antiprotozoal Agents	No	No
Ranitidine	4.16e-12	16	Anti-Ulcer Agents;Histamine H2 Antagonists	Yes	No
Piperacillin	4.22e-12	7	Anti-Bacterial Agents	No	No
Iohexol	4.24e-12	23	Contrast Media	No	No
Kanamycin	4.4e-12	37	Anti-Bacterial Agents	No	No
Neuronal Apoptosis-Inhibitory Protein	4.46e-12	8	Enzyme Inhibitors	Yes	No
Nitrofurantoin	4.48e-12	6	Anti-Infective Agents, Urinary	No	No
Oxolinic Acid	4.52e-12	10	Anti-Infective Agents;Anti-Infective Agents, Urinary	No	No
Iodoacetates	4.72e-12	47	Alkylating Agents;Enzyme Inhibitors	Yes	No
Pregnanolone	4.74e-12	17	Anesthetics	Yes	No
Neostigmine	4.8e-12	43	Cholinesterase Inhibitors;Parasympathomimetics	Yes	No
Atractyloside	4.95e-12	10	Enzyme Inhibitors	No	No
Cotinine	4.97e-12	26	Indicators and Reagents	Yes	No
Cephalothin	5.01e-12	9	Anti-Bacterial Agents	No	No
Quinpirole	5.12e-12	26	Dopamine Agonists	Yes	No
Toremifene	5.31e-12	9	Antineoplastic Agents, Hormonal;Bone Density Conservation Agents;Selective Estrogen Receptor Modulators	No	No
2-Naphthylamine	5.87e-12	15	Carcinogens	No	No
Methylazoxymethanol Acetate	6e-12	9	Protein Synthesis Inhibitors;Neurotoxins;Nucleic Acid Synthesis Inhibitors	Yes	No
Methoxychlor	6.02e-12	9	Insecticides	No	No
Pargyline	6.24e-12	27	Antihypertensive Agents;Monoamine Oxidase Inhibitors	Yes	No
Felodipine	6.27e-12	14	Anti-Arrhythmia Agents;Antihypertensive Agents;Calcium Channel Blockers;Vasodilator Agents	No	No
Lisuride	6.56e-12	11	Antiparkinson Agents;Serotonin Agonists;Dopamine Agonists	No	No
Thiostrepton	6.66e-12	8	Anti-Bacterial Agents	No	No
Cisapride	6.88e-12	2	Anti-Ulcer Agents;Serotonin Agonists;Gastrointestinal Agents	No	No
Natriuretic Peptide, C-Type	6.9e-12	11	Natriuretic Agents	No	No
Netropsin	7.02e-12	10	Antiviral Agents;Anti-Bacterial Agents	Yes	No
Pulmonary Surfactant-Associated Protein D	7.08e-12	12	Pulmonary Surfactants	No	No
Ceftazidime	7.16e-12	13	Anti-Bacterial Agents	No	No
Serum Albumin, Radio-Iodinated	7.33e-12	12	Radiopharmaceuticals	Yes	No
2,4-Dichlorophenoxyacetic Acid	7.97e-12	24	Herbicides	No	No
Phenprocoumon	8.03e-12	10	Anticoagulants	No	No
Estrogens, Conjugated (Usp)	8.38e-12	26	Estrogens	Yes	No
Succinylcholine	8.39e-12	19	Neuromuscular Depolarizing Agents	Yes	No
Zidovudine	8.91e-12	70	Antimetabolites;Reverse Transcriptase Inhibitors;Anti-HIV Agents	No	No
Furylfuramide	8.99e-12	5	Mutagens	No	No
Razoxane	9.09e-12	8	Cardiovascular Agents;Immunosuppressive Agents;Antineoplastic Agents;Chelating Agents	No	No
Cholestyramine	9.61e-12	31	Anticholesteremic Agents;Anion Exchange Resins	No	No
Digoxin	1e-11	41	Cardiotonic Agents;Enzyme Inhibitors;Anti-Arrhythmia Agents	Yes	No
Flunarizine	1.01e-11	19	Calcium Channel Blockers;Anticonvulsants;Vasodilator Agents;Histamine H1 Antagonists	No	No
Hemagglutinin Glycoproteins, Influenza Virus	1.02e-11	18	Hemagglutinins	No	No
Cromakalim	1.05e-11	19	Antihypertensive Agents;Bronchodilator Agents;Vasodilator Agents;Parasympatholytics	No	No
Myeloma Proteins	1.12e-11	29	Immunologic Factors	No	No
Natriuretic Peptide, Brain	1.13e-11	29	Natriuretic Agents	Yes	No
Azure Stains	1.13e-11	17	Coloring Agents	Yes	No
Ochratoxins	1.13e-11	18	Poisons	No	No
Melanocyte-Stimulating Hormones	1.62e-11	39	Hormones	Yes	No
Triazolam	1.84e-11	3	Adjuvants, Anesthesia;Anti-Anxiety Agents;GABA Modulators	No	No
Diuron	1.93e-11	13	Herbicides	No	No
Sucrose	2.1e-11	185	Sweetening Agents	Yes	No
Technetium Tc 99M Pentetate	2.16e-11	23	Chelating Agents;Radiopharmaceuticals	No	No
Thioridazine	2.31e-11	6	Antipsychotic Agents;Dopamine Antagonists	Yes	No
Carmine	2.44e-11	2	Coloring Agents;Food Coloring Agents	No	No
Polygeline	2.91e-11	5	Plasma Substitutes	No	No
Midodrine	2.95e-11	6	Adrenergic alpha-Agonists;Sympathomimetics;Vasoconstrictor Agents	No	No
P-Aminosalicylic Acid	2.97e-11	5	Antitubercular Agents	No	No
Trichlorfon	3.16e-11	11	Anthelmintics;Insecticides;Cholinesterase Inhibitors	Yes	No
Nafenopin	3.18e-11	7	Antilipemic Agents;Peroxisome Proliferators	No	No
Cephaloridine	3.24e-11	4	Anti-Bacterial Agents	No	No
Fluorides	3.8e-11	161	Cariostatic Agents	Yes	No
Zalcitabine	3.95e-11	13	Antimetabolites;Anti-HIV Agents;Reverse Transcriptase Inhibitors	No	No
Mollusk Venoms	4.07e-11	12	Poisons	No	No
Physalaemin	4.11e-11	9	Neurotransmitter Agents	No	No
Nicotine	4.36e-11	274	Ganglionic Stimulants;Nicotinic Agonists	Yes	No
Bumetanide	4.38e-11	22	Sodium Potassium Chloride Symporter Inhibitors;Diuretics	No	No
Insulin, Isophane	4.8e-11	7	Hypoglycemic Agents	No	No
Glycocholic Acid	4.95e-11	14	Cholagogues and Choleretics;Detergents	No	No
Chlortetracycline	5.42e-11	14	Antiprotozoal Agents;Anti-Bacterial Agents	No	No
Aminolevulinic Acid	5.62e-11	39	Photosensitizing Agents	No	No
Nicardipine	5.96e-11	29	Antihypertensive Agents;Calcium Channel Blockers;Vasodilator Agents;Anti-Asthmatic Agents	No	No
Streptogramins	6.29e-11	1	Anti-Bacterial Agents	No	No
Imidoesters	7.23e-11	7	Indicators and Reagents	No	No
Iodized Oil	7.28e-11	7	Contrast Media	No	No
Tetanus Antitoxin	8.08e-11	2	Immunologic Factors	No	No
Indocyanine Green	9.48e-11	31	Coloring Agents	No	No
Complement C4A	9.68e-11	6	Immunologic Factors	No	No
Terbutaline	9.9e-11	28	Bronchodilator Agents;Tocolytic Agents;Adrenergic beta-Agonists;Sympathomimetics	Yes	No
Metaraminol	9.98e-11	1	Adrenergic alpha-Agonists;Adrenergic Agents;Vasoconstrictor Agents;Sympathomimetics	No	No
Niacinamide	1.05e-10	41	Vitamin B Complex	Yes	No
Mexiletine	1.07e-10	3	Anti-Arrhythmia Agents	No	No
20-Alpha-Dihydroprogesterone	1.3e-10	8	Progestins	No	No
Barium Sulfate	1.34e-10	24	Contrast Media	No	No
Ancitabine	1.69e-10	6	Antimetabolites, Antineoplastic	No	No
Benzoyl Peroxide	1.72e-10	9	Dermatologic Agents	No	No
Dihydroergotoxine	1.73e-10	2	Dopamine Agonists;Nootropic Agents;Adrenergic alpha-Antagonists;Neuroprotective Agents	Yes	No
Floxuridine	1.76e-10	26	Antimetabolites, Antineoplastic	No	No
Cytidine Diphosphate Choline	1.85e-10	10	Nootropic Agents	Yes	No
Acetylmuramyl-Alanyl-Isoglutamine	1.86e-10	17	Adjuvants, Immunologic	No	No
Dipyrone	1.87e-10	1	Anti-Inflammatory Agents, Non-Steroidal	No	No
Amlodipine	1.88e-10	20	Antihypertensive Agents;Vasodilator Agents;Calcium Channel Blockers	No	No
Imipenem	1.95e-10	42	Anti-Bacterial Agents	No	No
Cuprizone	2.28e-10	4	Chelating Agents;Monoamine Oxidase Inhibitors	Yes	No
Acyclovir	2.42e-10	49	Antiviral Agents	No	No
Mefenamic Acid	2.46e-10	1	Cyclooxygenase Inhibitors;Anti-Inflammatory Agents, Non-Steroidal	Yes	No
Benperidol	2.52e-10	1	Antipsychotic Agents;Dopamine Antagonists	No	No
Lyngbya Toxins	2.77e-10	8	Poisons	No	No
Vanadium	2.89e-10	33	Trace Elements	No	No
Ferrosoferric Oxide	2.97e-10	9	Indicators and Reagents	Yes	No
Cobalt	3.01e-10	130	Trace Elements	Yes	No
Anaphylatoxins	3.25e-10	17	Immunologic Factors	No	No
Chlorothiazide	3.53e-10	6	Diuretics;Antihypertensive Agents;Sodium Chloride Symporter Inhibitors	Yes	No
Cefoperazone	3.53e-10	3	Anti-Bacterial Agents	No	No
Insulin Antibodies	3.76e-10	7	Immunologic Factors	No	No
Enterobactin	3.96e-10	9	Siderophores	No	No
Mephenytoin	4.08e-10	1	Anticonvulsants	No	No
Danazol	4.51e-10	6	Estrogen Antagonists	No	No
Sodium Pertechnetate Tc 99M	5.57e-10	21	Radiopharmaceuticals	Yes	No
Fluconazole	7.58e-10	21	Antifungal Agents	No	No
Cilazapril	8.23e-10	8	Angiotensin-Converting Enzyme Inhibitors;Antihypertensive Agents	No	No
Povidone	8.65e-10	18	Pharmaceutic Aids;Plasma Substitutes	No	No
Itraconazole	8.81e-10	14	Antifungal Agents;Antiprotozoal Agents	No	No
Glucose	9.19e-10	1330	Sweetening Agents	Yes	No
Methenamine	9.26e-10	2	Anti-Infective Agents, Urinary	Yes	No
Phenylpropanolamine	9.6e-10	16	Adrenergic alpha-Agonists;Nasal Decongestants;Appetite Depressants;Sympathomimetics	Yes	No
Amitrole	1.03e-09	11	Enzyme Inhibitors	No	No
Sulfisoxazole	1.03e-09	1	Anti-Infective Agents	No	No
Betahistine	1.09e-09	7	Vasodilator Agents;Histamine Agonists	No	No
Toyocamycin	1.09e-09	5	Antibiotics, Antineoplastic;Antimetabolites, Antineoplastic	No	No
N-Methylscopolamine	1.21e-09	12	Parasympatholytics	Yes	No
Tetraisopropylpyrophosphamide	1.32e-09	4	Cholinesterase Inhibitors	Yes	No
Phenoxybenzamine	1.64e-09	51	Antihypertensive Agents;Vasodilator Agents;Adrenergic alpha-Antagonists	No	No
Vidarabine Phosphate	1.64e-09	7	Antimetabolites;Antiviral Agents	No	No
Iodohippuric Acid	1.73e-09	4	Contrast Media	No	No
Acetylcarnitine	1.82e-09	10	Nootropic Agents;Vitamin B Complex	Yes	No
Glycodeoxycholic Acid	1.92e-09	5	Detergents	No	No
Lomustine	1.96e-09	16	Antineoplastic Agents, Alkylating	No	No
Methandrostenolone	2.18e-09	1	Anabolic Agents	No	No
Nitracrine	2.88e-09	4	Nucleic Acid Synthesis Inhibitors;Antineoplastic Agents	No	No
Diquat	2.96e-09	7	Defoliants, Chemical;Herbicides	No	No
Nialamide	3.14e-09	3	Antidepressive Agents;Monoamine Oxidase Inhibitors	No	No
Mannitol	3.31e-09	99	Diuretics, Osmotic;Sweetening Agents	Yes	No
Phenformin	3.87e-09	3	Hypoglycemic Agents	No	No
Mibefradil	4.09e-09	6	Calcium Channel Blockers;Antihypertensive Agents;Vasodilator Agents	No	No
Papaverine	4.14e-09	28	Phosphodiesterase Inhibitors;Vasodilator Agents	Yes	No
Luciferases, Renilla	4.18e-09	3	Luminescent Agents	No	No
Lithocholic Acid	4.54e-09	12	Detergents	Yes	No
Cardiac Glycosides	4.81e-09	14	Anti-Arrhythmia Agents;Cardiotonic Agents;Enzyme Inhibitors	No	No
Selegiline	4.99e-09	20	Antiparkinson Agents;Monoamine Oxidase Inhibitors;Neuroprotective Agents	Yes	No
Phosphoramide Mustards	5.38e-09	7	Antineoplastic Agents, Alkylating	No	No
Triiodobenzoic Acids	5.39e-09	19	Plant Growth Regulators	Yes	No
Nedocromil	6.38e-09	11	Anti-Inflammatory Agents;Anti-Allergic Agents;Anti-Asthmatic Agents	No	No
Zeranol	6.5e-09	6	Estrogens, Non-Steroidal	No	No
Cefaclor	6.55e-09	2	Anti-Bacterial Agents	No	No
Nomifensine	7.41e-09	15	Dopamine Uptake Inhibitors	No	No
Alpha-Tocopherol	7.59e-09	30	Antioxidants;Vitamins	Yes	No
Phenolsulfonphthalein	7.64e-09	10	Coloring Agents;Indicators and Reagents	No	No
Guanidine	7.75e-09	133	Parasympathomimetics	No	No
Benzphetamine	8.43e-09	1	Central Nervous System Stimulants;Dopamine Agents;Sympathomimetics;Adrenergic Agents;Dopamine Uptake Inhibitors;Adrenergic Uptake Inhibitors	No	No
Alendronate	8.82e-09	16	Bone Density Conservation Agents	No	No
Oxprenolol	9.2e-09	13	Adrenergic beta-Antagonists;Vasodilator Agents;Antihypertensive Agents;Sympatholytics;Anti-Anxiety Agents;Anti-Arrhythmia Agents	No	No
Lysergic Acid Diethylamide	1.22e-08	42	Hallucinogens;Serotonin Antagonists;Serotonin Agonists	No	No
Sodium Salicylate	1.25e-08	19	Anti-Inflammatory Agents, Non-Steroidal;Cyclooxygenase Inhibitors	No	No
Edrophonium	1.26e-08	14	Antidotes;Cholinesterase Inhibitors	Yes	No
Ovomucin	1.3e-08	6	Trypsin Inhibitors	No	No
Pyrilamine	1.44e-08	20	Histamine H1 Antagonists;Anti-Allergic Agents	No	No
Gastrin-Releasing Peptide	1.52e-08	22	Gastrointestinal Agents	Yes	No
Gliotoxin	1.54e-08	6	Immunosuppressive Agents	Yes	No
Eosine Yellowish-(Ys)	1.67e-08	19	Fluorescent Dyes	Yes	No
Quinidine	1.68e-08	27	Anti-Arrhythmia Agents;Adrenergic alpha-Antagonists;Enzyme Inhibitors;Muscarinic Antagonists;Antimalarials	No	No
Sodium Glutamate	1.75e-08	13	Food Additives	No	No
Tetraethylammonium	1.79e-08	44	Potassium Channel Blockers	Yes	No
Dimercaprol	1.9e-08	15	Chelating Agents	Yes	No
Trans-1,4-Bis(2-Chlorobenzaminomethyl)Cyclohexane Dihydrochloride	2.01e-08	3	Anticholesteremic Agents	No	No
24,25-Dihydroxyvitamin D 3	2.08e-08	10	Vitamins;Bone Density Conservation Agents	No	No
Phenylalanine Ammonia-Lyase	2.08e-08	9	Antineoplastic Agents	No	No
Ifosfamide	2.43e-08	33	Immunosuppressive Agents;Antineoplastic Agents, Alkylating	No	No
Cladribine	2.48e-08	12	Antineoplastic Agents;Immunosuppressive Agents	No	No
Primidone	2.62e-08	4	Anticonvulsants	Yes	No
Didanosine	2.71e-08	16	Antimetabolites;Reverse Transcriptase Inhibitors;Anti-HIV Agents	No	No
Fosfomycin	2.75e-08	16	Anti-Bacterial Agents	No	No
Fmrfamide	3.01e-08	12	Membrane Transport Modulators	No	No
Acetoxyacetylaminofluorene	3.34e-08	5	Alkylating Agents	No	No
Theobromine	3.59e-08	18	Bronchodilator Agents;Vasodilator Agents	No	No
Promethazine	3.7e-08	8	Antipruritics;Anti-Allergic Agents;Histamine H1 Antagonists	No	No
Medetomidine	3.71e-08	12	Adrenergic alpha-Agonists;Analgesics, Non-Narcotic;Hypnotics and Sedatives	No	No
Cefamandole	4.23e-08	3	Anti-Bacterial Agents	No	No
Diatrizoate Meglumine	4.44e-08	4	Contrast Media	No	No
Chlormadinone Acetate	4.51e-08	3	Contraceptives, Oral, Synthetic;Androgen Antagonists	No	No
Htlv-Ii Antibodies	5.62e-08	4	Immunologic Factors	No	No
Budesonide	6.36e-08	23	Bronchodilator Agents;Glucocorticoids;Anti-Inflammatory Agents	Yes	No
Eosinophil Peroxidase	6.37e-08	9	Immunologic Factors	Yes	No
Pulmonary Surfactant-Associated Protein C	7.02e-08	3	Pulmonary Surfactants	Yes	No
Ticarcillin	7.09e-08	17	Anti-Bacterial Agents	No	No
Clobetasol	7.39e-08	8	Anti-Inflammatory Agents;Glucocorticoids	No	No
Colistin	7.84e-08	5	Anti-Bacterial Agents	No	No
Hydroxymercuribenzoates	8e-08	11	Enzyme Inhibitors;Sulfhydryl Reagents	No	No
Proflavine	8.15e-08	6	Anti-Infective Agents, Local	No	No
Ibuprofen	8.19e-08	47	Anti-Inflammatory Agents, Non-Steroidal;Cyclooxygenase Inhibitors;Analgesics, Non-Narcotic	Yes	No
Permethrin	8.34e-08	6	Enzyme Inhibitors;Insecticides	No	No
Clodronic Acid	8.69e-08	11	Bone Density Conservation Agents	No	No
Antimony Sodium Gluconate	8.87e-08	7	Schistosomicides;Antiprotozoal Agents	No	No
Ajmaline	9.04e-08	2	Anti-Arrhythmia Agents	No	No
Betamethasone 17-Valerate	9.63e-08	6	Anti-Inflammatory Agents;Glucocorticoids	No	No
Tranexamic Acid	9.76e-08	15	Antifibrinolytic Agents	No	No
Firefly Luciferin	1.13e-07	9	Luminescent Agents	No	No
Triethylenephosphoramide	1.26e-07	3	Antineoplastic Agents, Alkylating	No	No
Amyl Nitrite	1.28e-07	1	Vasodilator Agents	No	No
Aminobenzoic Acids	1.35e-07	11	Vitamin B Complex	Yes	No
Etanidazole	1.39e-07	6	Antineoplastic Agents;Radiation-Sensitizing Agents	No	No
Chimerin Proteins	1.51e-07	3	GTP Phosphohydrolase Activators	No	No
Oxacillin	1.59e-07	8	Anti-Bacterial Agents	No	No
Dextrans	1.6e-07	182	Anticoagulants;Plasma Substitutes	Yes	No
Riluzole	1.61e-07	9	Anesthetics;Anticonvulsants;Excitatory Amino Acid Antagonists;Neuroprotective Agents	Yes	No
Phenobarbital	1.68e-07	140	Hypnotics and Sedatives;GABA Modulators;Anticonvulsants;Excitatory Amino Acid Antagonists	Yes	No
Emodin	1.85e-07	6	Enzyme Inhibitors	No	No
Sulfadoxine	1.93e-07	16	Anti-Infective Agents;Anti-Infective Agents, Urinary;Antimalarials	No	No
Formazans	1.96e-07	12	Indicators and Reagents	Yes	No
Technetium Tc 99M Medronate	2.15e-07	13	Radiopharmaceuticals	No	No
Gentamicins	2.18e-07	132	Anti-Bacterial Agents	No	No
Methaqualone	2.18e-07	1	Hypnotics and Sedatives	No	No
Hematoporphyrin Derivative	2.22e-07	2	Antineoplastic Agents;Photosensitizing Agents	No	No
Amitriptyline	2.23e-07	26	Antidepressive Agents, Tricyclic;Adrenergic Uptake Inhibitors;Analgesics, Non-Narcotic	Yes	No
Methotrimeprazine	2.25e-07	1	Antipsychotic Agents;Analgesics, Non-Narcotic;Dopamine Antagonists	No	No
Tiron	2.28e-07	10	Indicators and Reagents	No	No
Bromhexine	2.34e-07	4	Expectorants	No	No
Arecoline	2.69e-07	11	Cholinergic Agonists	Yes	No
Eledoisin	2.81e-07	8	Neurotransmitter Agents	No	No
Chlorisondamine	3.14e-07	12	Antihypertensive Agents;Nicotinic Antagonists;Ganglionic Blockers	No	No
Ellipticines	3.59e-07	8	Antineoplastic Agents, Phytogenic;Immunosuppressive Agents	No	No
Prodigiosin	3.6e-07	7	Anti-Bacterial Agents	No	No
Cephradine	3.76e-07	1	Anti-Bacterial Agents	No	No
Pactamycin	3.8e-07	5	Antibiotics, Antineoplastic;Protein Synthesis Inhibitors	No	No
Daptomycin	3.85e-07	6	Anti-Bacterial Agents	Yes	No
Fluorides, Topical	4.88e-07	9	Cariostatic Agents	No	No
Curare	5.02e-07	9	Nicotinic Antagonists;Neuromuscular Nondepolarizing Agents	No	No
Vancomycin	5.33e-07	43	Anti-Bacterial Agents	No	No
Batroxobin	5.41e-07	5	Fibrinolytic Agents;Hemostatics	No	No
Phenylmercury Compounds	5.54e-07	4	Fungicides, Industrial	No	No
Orphenadrine	5.57e-07	1	Antiparkinson Agents;Muscle Relaxants, Central;Parasympatholytics;Muscarinic Antagonists	No	No
Chloromercuribenzoates	5.98e-07	28	Enzyme Inhibitors;Sulfhydryl Reagents	No	No
Codeine	6.2e-07	13	Analgesics, Opioid;Antitussive Agents;Narcotics	No	No
Hepatitis A Antibodies	6.58e-07	1	Immunologic Factors	No	No
Deanol	6.64e-07	5	Antidepressive Agents;Anti-Dyskinesia Agents	No	No
Melatonin	6.73e-07	78	Adjuvants, Immunologic;Anticonvulsants;Antioxidants;Free Radical Scavengers	Yes	No
Antistreptolysin	8.05e-07	17	Immunologic Factors	No	No
Paromomycin	8.08e-07	12	Amebicides;Anti-Bacterial Agents	No	No
Alcuronium	8.15e-07	4	Adjuvants, Anesthesia;Neuromuscular Nondepolarizing Agents;Nicotinic Antagonists	No	No
Sodium Oxybate	8.59e-07	10	Adjuvants, Anesthesia;Anesthetics, Intravenous	Yes	No
Amifostine	8.89e-07	12	Radiation-Protective Agents	No	No
Isoxsuprine	8.89e-07	1	Adrenergic beta-Agonists;Sympathomimetics;Tocolytic Agents;Vasodilator Agents	No	No
Clonazepam	9.04e-07	21	Anticonvulsants;GABA Modulators	Yes	No
Magnesium Hydroxide	9.11e-07	2	Antacids	No	No
Iscoms	9.15e-07	7	Adjuvants, Immunologic	No	No
Dilazep	9.47e-07	5	Vasodilator Agents	No	No
Diclofenac	1.03e-06	35	Anti-Inflammatory Agents, Non-Steroidal;Cyclooxygenase Inhibitors	Yes	No
Chlorpheniramine	1.04e-06	18	Histamine H1 Antagonists;Antipruritics;Anti-Allergic Agents	No	No
Ketoconazole	1.12e-06	23	Antifungal Agents	No	No
Ergoloid_Mesylates	1.19e-06	2	(null)	No	No
Dibenz(B,F)(1,4)Oxazepine-10(11H)-Carboxylic Acid, 8-Chloro-, 2-Acetylhydrazide	1.29e-06	2	Prostaglandin Antagonists	No	No
Maltose	1.31e-06	47	Sweetening Agents	No	No
Droperidol	1.46e-06	6	Adjuvants, Anesthesia;Antiemetics;Antipsychotic Agents;Dopamine Antagonists	No	No
Nafoxidine	1.47e-06	7	Estrogen Antagonists;Antineoplastic Agents, Hormonal	No	No
3-Iodobenzylguanidine	1.57e-06	18	Antineoplastic Agents;Radiopharmaceuticals;Enzyme Inhibitors	Yes	No
Dicumarol	1.59e-06	19	Anticoagulants;Enzyme Inhibitors;Uncoupling Agents	No	No
Centchroman	1.59e-06	3	Contraceptives, Postcoital, Synthetic;Estrogen Antagonists	No	No
Pancrelipase	1.59e-06	3	Gastrointestinal Agents	No	No
Deet	1.63e-06	6	Insect Repellents	No	No
Liver Extracts	1.8e-06	9	Hematinics	No	No
Pefloxacin	1.82e-06	2	Anti-Infective Agents	No	No
1-Naphthylamine	1.85e-06	11	Carcinogens	Yes	No
Metrizamide	1.98e-06	9	Contrast Media	No	No
Zearalenone	2.05e-06	10	Estrogens, Non-Steroidal	No	No
Gonadotropins, Pituitary	2.06e-06	48	Fertility Agents, Female;Fertility Agents, Male	Yes	No
Memantine	2.24e-06	8	Dopamine Agents;Excitatory Amino Acid Antagonists;Antiparkinson Agents	Yes	Yes
Nalbuphine	2.29e-06	8	Analgesics, Opioid;Narcotic Antagonists;Narcotics	No	No
Picibanil	2.38e-06	12	Antineoplastic Agents	No	No
Hexamethonium	2.41e-06	45	Antihypertensive Agents;Nicotinic Antagonists;Ganglionic Blockers	Yes	No
Adenosine	2.44e-06	841	Analgesics;Anti-Arrhythmia Agents;Vasodilator Agents	Yes	No
Antibodies, Heterophile	2.44e-06	15	Immunologic Factors	No	No
Immunoglobulin J-Chains	2.46e-06	9	Immunologic Factors	No	No
Enoxacin	2.47e-06	2	Anti-Infective Agents	No	No
Glycopyrrolate	2.56e-06	1	Adjuvants, Anesthesia;Muscarinic Antagonists	Yes	No
Tolazoline	2.66e-06	3	Adrenergic alpha-Antagonists;Antihypertensive Agents;Vasodilator Agents	No	No
Thiamine	2.83e-06	53	Vitamin B Complex	Yes	No
Amdinocillin	3.01e-06	7	Anti-Bacterial Agents;Anti-Infective Agents, Urinary	No	No
Carboprost	3.02e-06	4	Abortifacient Agents, Nonsteroidal;Oxytocics	No	No
Technetium Tc 99M Aggregated Albumin	3.32e-06	20	Radiopharmaceuticals	No	No
Thymol	3.47e-06	3	Anti-Infective Agents, Local;Anti-Infective Agents;Antifungal Agents	No	No
Rhodamine 123	3.49e-06	16	Fluorescent Dyes	Yes	No
Oxalic Acid	3.49e-06	14	Reducing Agents	No	No
Benzoylarginine Nitroanilide	3.6e-06	5	Chromogenic Compounds	No	No
Pulmonary Surfactant-Associated Protein B	3.72e-06	4	Pulmonary Surfactants	No	No
Mestranol	4.04e-06	7	Estrogens	No	No
Pentachlorophenol	4.14e-06	16	Environmental Pollutants;Uncoupling Agents;Poisons;Enzyme Inhibitors;Herbicides;Insecticides;Pesticides	No	No
Procarbazine	4.34e-06	24	Antineoplastic Agents	No	No
Bongkrekic Acid	4.44e-06	4	Anti-Bacterial Agents	Yes	No
Deltaretrovirus Antibodies	4.51e-06	5	Immunologic Factors	No	No
Cephalexin	4.7e-06	6	Anti-Bacterial Agents	No	No
Metyrapone	5.13e-06	15	Antimetabolites;Enzyme Inhibitors	No	No
Streptavidin	5.52e-06	34	Indicators and Reagents	Yes	No
Antimony Potassium Tartrate	5.59e-06	4	Schistosomicides	No	No
Immunoconjugates	5.93e-06	8	Immunologic Factors	Yes	No
Gastric Inhibitory Polypeptide	5.99e-06	14	Gastrointestinal Agents	No	No
Nisoldipine	5.99e-06	10	Antihypertensive Agents;Vasodilator Agents;Calcium Channel Blockers	No	No
Iopanoic Acid	6.26e-06	6	Contrast Media	No	No
Parathion	6.34e-06	8	Cholinesterase Inhibitors;Insecticides	No	No
Tretoquinol	6.59e-06	3	Adrenergic beta-Agonists;Sympathomimetics;Bronchodilator Agents	No	No
Sodium Dodecyl Sulfate	7.3e-06	183	Surface-Active Agents	Yes	No
Sulpiride	7.98e-06	33	Dopamine Antagonists;Antidepressive Agents, Second-Generation;Antipsychotic Agents	Yes	No
Azaperone	2.58e-05	2	Hypnotics and Sedatives;Dopamine Antagonists;Antipsychotic Agents	No	No
Norgestrel	2.6e-05	18	Contraceptives, Oral, Synthetic	No	No
Vitamin U	2.61e-05	4	Gastrointestinal Agents;Vitamins;Anti-Ulcer Agents	No	No
Hydroxyzine	2.63e-05	4	Antipruritics;Histamine H1 Antagonists	Yes	No
Bicarbonates	2.64e-05	167	Buffers	Yes	No
Amoxicillin-Potassium Clavulanate Combination	2.66e-05	3	Anti-Bacterial Agents;Enzyme Inhibitors	No	No
Carnitine	2.69e-05	52	Vitamin B Complex	Yes	No
Mescaline	2.69e-05	3	Hallucinogens;Serotonin Agonists	No	No
Cetomacrogol	2.73e-05	3	Surface-Active Agents	No	No
Angiostatic Proteins	2.73e-05	1	Angiogenesis Inhibitors	No	No
Nitrazepam	2.82e-05	3	Anticonvulsants;Hypnotics and Sedatives;GABA Modulators;Anti-Anxiety Agents	No	No
Fosinopril	2.9e-05	5	Angiotensin-Converting Enzyme Inhibitors;Antihypertensive Agents	No	No
Methylthiouracil	2.9e-05	2	Antithyroid Agents	No	No
1,2-Dimethylhydrazine	3.13e-05	13	Alkylating Agents;Mutagens;Carcinogens	No	No
Estramustine	3.13e-05	9	Antineoplastic Agents, Alkylating;Antineoplastic Agents, Hormonal;Radiation-Protective Agents	No	No
Ritonavir	3.14e-05	15	HIV Protease Inhibitors	Yes	No
Poloxalene	3.14e-05	5	Cathartics;Disinfectants;Surface-Active Agents	No	No
Furazolidone	3.19e-05	4	Anti-Infective Agents, Local;Antitrichomonal Agents;Monoamine Oxidase Inhibitors;Anti-Infective Agents, Urinary	No	No
Cimetidine	3.21e-05	49	Enzyme Inhibitors;Anti-Ulcer Agents;Histamine H2 Antagonists	Yes	No
Debrisoquin	3.24e-05	4	Antihypertensive Agents;Adrenergic Agents;Sympatholytics	Yes	No
Ornipressin	3.28e-05	3	Hemostatics;Vasoconstrictor Agents;Antidiuretic Agents	No	No
Nafcillin	3.28e-05	1	Anti-Bacterial Agents	No	No
Dihydroxycholecalciferols	3.3e-05	9	Vitamins;Bone Density Conservation Agents	No	No
Hetastarch	3.41e-05	14	Plasma Substitutes	No	No
Prednisolone	3.44e-05	121	Anti-Inflammatory Agents;Antineoplastic Agents, Hormonal;Glucocorticoids	Yes	No
Mycophenolic Acid	3.49e-05	28	Antibiotics, Antineoplastic;Enzyme Inhibitors	No	No
Psyllium	3.67e-05	6	Cathartics	No	No
Disopyramide	3.84e-05	5	Anti-Arrhythmia Agents	No	No
Tilorone	3.9e-05	4	Anti-Inflammatory Agents;Interferon Inducers;Antineoplastic Agents;Antiviral Agents	No	No
Trifluridine	4.12e-05	5	Antiviral Agents;Antimetabolites	No	No
Nitromifene	4.13e-05	3	Estrogen Antagonists	No	No
Tuftsin	4.16e-05	6	Immunologic Factors	No	No
Droxidopa	6.04e-05	5	Antiparkinson Agents	No	No
Tetanus Toxin	6.32e-05	19	Neurotoxins	Yes	No
Iopamidol	6.33e-05	12	Contrast Media	No	No
Altretamine	6.54e-05	6	Antineoplastic Agents, Alkylating	No	No
Ceftizoxime	6.88e-05	3	Anti-Bacterial Agents	No	No
Chlorhexidine	6.95e-05	16	Anti-Infective Agents, Local;Mouthwashes;Disinfectants	No	No
Dextrorphan	7.01e-05	6	Excitatory Amino Acid Antagonists;Neuroprotective Agents	No	No
Proglumide	7.3e-05	10	Anti-Ulcer Agents	No	No
Phenacetin	7.31e-05	8	Analgesics, Non-Narcotic;Enzyme Inhibitors	No	No
Thenoyltrifluoroacetone	7.39e-05	3	Chelating Agents	No	No
Echothiophate Iodide	9.23e-05	8	Cholinesterase Inhibitors;Parasympathomimetics;Miotics	No	No
Phenolphthaleins	9.34e-05	4	Cathartics;Coloring Agents;Indicators and Reagents	No	No
Sulfamonomethoxine	9.53e-05	3	Anti-Infective Agents	No	No
Fluorodeoxyglucose F18	9.57e-05	51	Radiopharmaceuticals	Yes	No
Aurothioglucose	9.81e-05	8	Antirheumatic Agents	No	No
Phenolphthalein	9.82e-05	4	Cathartics;Indicators and Reagents	No	No
Immunoglobulin Km Allotypes	9.93e-05	1	Immunologic Factors	No	No
Propantheline	0.000101687	2	Anti-Ulcer Agents;Muscarinic Antagonists	No	No
Nalidixic Acid	0.000102596	27	Anti-Infective Agents;Enzyme Inhibitors	No	No
3-Deazauridine	0.000105319	2	Antimetabolites, Antineoplastic	No	No
Phosgene	0.000126182	1	Chemical Warfare Agents	No	No
Diethylcarbamazine	0.00012641	5	Lipoxygenase Inhibitors;Filaricides	No	No
Josamycin	0.000127131	6	Anti-Bacterial Agents	No	No
Vindesine	0.000130484	4	Antineoplastic Agents, Phytogenic;Tubulin Modulators	No	No
Bromcresol Purple	0.000130708	2	Indicators and Reagents	No	No
Pyridostigmine Bromide	0.000134381	12	Cholinesterase Inhibitors	Yes	No
Platelet Factor 3	0.000134601	1	Coagulants	No	No
Ergocalciferols	0.000135149	5	Bone Density Conservation Agents;Vitamins	Yes	No
Hydrochlorothiazide	0.000137663	22	Diuretics;Antihypertensive Agents;Sodium Chloride Symporter Inhibitors	Yes	No
Acitretin	0.000158022	1	Keratolytic Agents	No	No
Norfloxacin	0.000160513	8	Anti-Infective Agents;Enzyme Inhibitors	No	No
Aminacrine	0.000170336	6	Anti-Infective Agents, Local;Indicators and Reagents;Fluorescent Dyes;Mutagens	Yes	No
Dehydroepiandrosterone	0.000188712	68	Adjuvants, Immunologic	Yes	No
Dibenzylchlorethamine	0.000193518	1	Adrenergic alpha-Antagonists;Sympatholytics	No	No
Tolonium Chloride	0.000198105	9	Coloring Agents;Heparin Antagonists;Hemostatics	Yes	No
Chromium	0.000201725	88	Trace Elements	Yes	No
Dihematoporphyrin Ether	0.000202456	6	Antiviral Agents;Photosensitizing Agents;Antineoplastic Agents;Dermatologic Agents	No	No
Piperonyl Butoxide	0.00020275	2	Pesticide Synergists	No	No
Melphalan	0.000222905	49	Myeloablative Agonists;Antineoplastic Agents, Alkylating	Yes	No
Harmaline	0.000223071	7	Central Nervous System Stimulants;Monoamine Oxidase Inhibitors	No	No
Barbital	0.000223071	2	Hypnotics and Sedatives;GABA Modulators	No	No
Nitrilotriacetic Acid	0.00022866	9	Chelating Agents	No	No
Taurochenodeoxycholic Acid	0.000229271	6	Cholagogues and Choleretics;Detergents	Yes	No
Dihydrotachysterol	0.000229969	2	Vitamins;Bone Density Conservation Agents	No	No
4-Chloromercuribenzenesulfonate	0.000230078	10	Enzyme Inhibitors;Sulfhydryl Reagents	No	No
Melengestrol Acetate	0.000233265	5	Glucocorticoids	No	No
Etodolac	0.000233265	4	Anti-Inflammatory Agents, Non-Steroidal;Cyclooxygenase Inhibitors	No	No
Alprazolam	0.000253649	13	Hypnotics and Sedatives;Anti-Anxiety Agents;GABA Modulators	No	No
Coumaphos	0.000259828	2	Cholinesterase Inhibitors;Anthelmintics;Antinematodal Agents;Insecticides	No	No
Mersalyl	0.000265776	9	Enzyme Inhibitors	No	No
Betamethasone	0.000287908	16	Anti-Inflammatory Agents;Glucocorticoids;Anti-Asthmatic Agents	No	No
Hydroxyphenylazouracil	0.000315596	2	Nucleic Acid Synthesis Inhibitors	No	No
Cefazolin	0.000318866	11	Anti-Bacterial Agents	No	No
Beta-Aminoethyl Isothiourea	0.0003237	2	Radiation-Protective Agents	No	No
Androstenediol	0.000348874	7	Anabolic Agents	Yes	No
Framycetin	0.000356139	3	Anti-Bacterial Agents	No	No
Cerulenin	0.000389727	6	Antibiotics, Antifungal	No	No
Virginiamycin	0.000409777	9	Anti-Bacterial Agents	No	No
Antivenins	0.000441671	15	Immunologic Factors	No	No
Griseofulvin	0.00044238	10	Antibiotics, Antifungal	Yes	No
Bacteriocins	0.000477745	31	Anti-Bacterial Agents	No	No
Deuterium Oxide	0.00047817	15	Antineoplastic Agents;Radiation-Protective Agents	Yes	No
Fluoxymesterone	0.000503002	3	Antineoplastic Agents, Hormonal;Anabolic Agents	No	No
Antipain	0.00050655	5	Protease Inhibitors	No	No
Benzalkonium Compounds	0.00050655	4	Anti-Infective Agents, Local;Preservatives, Pharmaceutical;Detergents	No	No
Clopenthixol	0.00054144	1	Dopamine Antagonists;Antipsychotic Agents	No	No
Colestipol	0.000545662	1	Anion Exchange Resins;Antilipemic Agents	No	No
Parabens	0.000565626	8	Food Preservatives;Preservatives, Pharmaceutical	No	No
Doxepin	0.00057395	2	Anti-Anxiety Agents;Histamine Antagonists;Antipruritics;Antidepressive Agents, Tricyclic;Adrenergic Uptake Inhibitors	Yes	No
Dianhydrogalactitol	0.00057395	3	Antineoplastic Agents, Alkylating	No	No
Penicillin G, Procaine	0.000598268	4	Anti-Bacterial Agents	No	No
Nafarelin	0.000605139	1	Fertility Agents, Female	No	No
5-Hydroxytryptophan	0.000628699	31	Antidepressive Agents, Second-Generation	Yes	No
Magnesium Sulfate	0.000670301	12	Analgesics;Anti-Arrhythmia Agents;Calcium Channel Blockers;Tocolytic Agents;Anticonvulsants;Anesthetics	No	No
Harmine	0.00068799	6	Monoamine Oxidase Inhibitors;Hallucinogens	No	No
Moxalactam	0.000699113	3	Anti-Bacterial Agents	No	No
Trapidil	0.000699535	3	Platelet Aggregation Inhibitors;Vasodilator Agents	No	No
Sodium Benzoate	0.000723735	6	Antifungal Agents;Food Preservatives	No	No
Dibekacin	0.000729306	5	Anti-Bacterial Agents	No	No
Atenolol	0.000748266	26	Antihypertensive Agents;Sympatholytics;Adrenergic beta-Antagonists;Anti-Arrhythmia Agents	No	No
Alcian Blue	0.000750191	10	Coloring Agents	No	No
Povidone-Iodine	0.000757788	6	Anti-Infective Agents, Local	No	No
Ondansetron	0.000760566	24	Antiemetics;Antipsychotic Agents;Antipruritics;Serotonin Antagonists;Anti-Anxiety Agents	Yes	No
Technetium Tc 99M Exametazime	0.000760924	15	Radiopharmaceuticals	Yes	No
Dextrothyroxine	0.000776446	1	Anticholesteremic Agents	No	No
Atracurium	0.000779988	15	Nicotinic Antagonists;Neuromuscular Nondepolarizing Agents	No	No
Thorium Dioxide	0.000785646	3	Carcinogens	No	No
Thymopentin	0.000785646	3	Adjuvants, Immunologic	No	No
Metformin	0.000816831	24	Hypoglycemic Agents	No	No
Asbestos	0.000845891	60	Carcinogens	Yes	No
Tetramethylphenylenediamine	0.000869723	4	Indicators and Reagents	No	No
Thalidomide	0.000873224	17	Immunosuppressive Agents;Angiogenesis Inhibitors;Teratogens;Leprostatic Agents	Yes	No
Fendiline	0.000934005	2	Calcium Channel Blockers;Vasodilator Agents;Anti-Arrhythmia Agents	No	No
Glycochenodeoxycholic Acid	0.000970316	3	Detergents	No	No
Ethacridine	0.000991709	3	Anti-Infective Agents, Local	No	No
Fumonisins	0.000994421	5	Poisons	No	No
Vitamin B 6	0.00100056	23	Vitamin B Complex	Yes	No
Tropicamide	0.00100137	3	Mydriatics;Muscarinic Antagonists	Yes	No
Bence Jones Protein	0.00101681	7	Immunologic Factors	No	No
Methazolamide	0.00103037	4	Carbonic Anhydrase Inhibitors;Diuretics	No	No
Inosine Pranobex	0.00105406	1	Adjuvants, Immunologic;Antiviral Agents	No	No
Etidronic Acid	0.00108447	14	Bone Density Conservation Agents	No	No
Primaquine	0.0011069	5	Antimalarials	No	No
Ipratropium	0.0011135	11	Bronchodilator Agents;Cholinergic Antagonists	Yes	No
Trenbolone	0.00114241	4	Anabolic Agents	No	No
Polymethyl Methacrylate	0.00114394	17	Bone Cements;Vasodilator Agents;Antimutagenic Agents	No	No
Clofazimine	0.00117369	8	Coloring Agents;Leprostatic Agents;Anti-Inflammatory Agents, Non-Steroidal	No	No
Demeclocycline	0.00119558	2	Anti-Bacterial Agents	No	No
Guanabenz	0.00122685	1	Adrenergic alpha-Agonists;Antihypertensive Agents;Sympatholytics	No	No
Benserazide	0.00125505	9	Antiparkinson Agents;Dopamine Agents;Enzyme Inhibitors	Yes	No
Chlorthalidone	0.00126675	13	Sodium Chloride Symporter Inhibitors;Antihypertensive Agents;Diuretics	No	No
Castor Oil	0.0012915	7	Cathartics	No	No
Diphenhydramine	0.00129681	18	Anesthetics, Local;Antipruritics;Histamine H1 Antagonists;Anti-Allergic Agents;Hypnotics and Sedatives;Antitussive Agents;Antiparkinson Agents;Antiemetics	Yes	No
Delta Sleep-Inducing Peptide	0.00135631	5	Neurotransmitter Agents	Yes	No
2-Methyl-4-Chlorophenoxyacetic Acid	0.00135643	1	Herbicides	No	No
Doxapram	0.00140657	1	Respiratory System Agents;Central Nervous System Stimulants	No	No
Etidocaine	0.00141177	3	Anesthetics, Local	No	No
Tegafur	0.00144067	8	Antimetabolites, Antineoplastic	No	No
Niacin	0.00155464	24	Vasodilator Agents;Antilipemic Agents;Vitamin B Complex	Yes	No
Desogestrel	0.00158573	11	Contraceptives, Oral, Synthetic	No	No
Tromethamine	0.00165307	20	Buffers;Excipients	Yes	No
Flumethasone	0.00173555	3	Anti-Inflammatory Agents;Glucocorticoids	No	No
Diflunisal	0.001802	5	Cyclooxygenase Inhibitors;Anti-Inflammatory Agents, Non-Steroidal	No	No
Cefadroxil	0.00182815	1	Anti-Bacterial Agents	No	No
Sucralfate	0.00185655	6	Anti-Ulcer Agents	Yes	No
Chitosan	0.00187948	24	Biocompatible Materials;Chelating Agents;Anticholesteremic Agents;Hemostatics	No	No
Rheumatoid Factor	0.00188151	41	Immunologic Factors	Yes	No
Dexfenfluramine	0.00188433	4	Serotonin Agonists	No	No
Hexoprenaline	0.001974	2	Adrenergic beta-Agonists;Tocolytic Agents;Sympathomimetics;Bronchodilator Agents	No	No
Ioxaglic Acid	0.00199986	6	Contrast Media	No	No
Bendroflumethiazide	0.00205273	7	Antihypertensive Agents;Sodium Chloride Symporter Inhibitors;Diuretics	No	No
Guaifenesin	0.00205607	3	Expectorants	No	No
Betaxolol	0.00205607	1	Sympatholytics;Adrenergic beta-Antagonists;Antihypertensive Agents	No	No
Benzydamine	0.00208666	4	Anti-Inflammatory Agents	No	No
Sisomicin	0.00210728	2	Anti-Bacterial Agents	No	No
Arsenazo Iii	0.00211026	1	Coloring Agents;Indicators and Reagents	No	No
Ephedrine	0.00211192	18	Adrenergic alpha-Agonists;Vasoconstrictor Agents;Adrenergic Agents;Sympathomimetics;Adrenergic beta-Agonists;Bronchodilator Agents;Central Nervous System Stimulants	No	No
Dinitrophenols	0.00213748	45	Fungicides, Industrial;Uncoupling Agents	No	No
Nicotinyl Alcohol	0.00222132	2	Vasodilator Agents	No	No
Bisoprolol	0.00222414	3	Adrenergic beta-Antagonists;Antihypertensive Agents;Sympatholytics	No	No
Guanethidine	0.00229068	21	Antihypertensive Agents;Sympatholytics;Adrenergic Agents	No	No
Pemoline	0.00231207	6	Central Nervous System Stimulants	No	No
Nordefrin	0.00243333	3	Vasoconstrictor Agents	No	No
2,4-Dinitrophenol	0.00246744	20	Coloring Agents;Uncoupling Agents	Yes	No
Nitric Acid	0.00248129	13	Explosive Agents	No	No
Nitroblue Tetrazolium	0.00249223	22	Indicators and Reagents	No	No
Celiprolol	0.0025213	5	Adrenergic beta-Antagonists;Vasodilator Agents;Sympatholytics;Anti-Arrhythmia Agents;Antihypertensive Agents	No	No
Nitrous Oxide	0.00253573	91	Analgesics, Non-Narcotic;Anesthetics, Inhalation	No	No
Lincomycin	0.0025474	9	Anti-Bacterial Agents	No	No
Secobarbital	0.00256129	6	Hypnotics and Sedatives;GABA Modulators;Adjuvants, Anesthesia	No	No
Dithioerythritol	0.00256129	5	Sulfhydryl Reagents	No	No
Diethylhexyl Phthalate	0.0025974	10	Plasticizers	No	No
Prednimustine	0.00268767	3	Antineoplastic Agents, Alkylating	No	No
Fleroxacin	0.00268767	1	Enzyme Inhibitors;Anti-Infective Agents	No	No
Diethylpropion	0.0028008	4	Appetite Depressants	No	No
Chlorobutanol	0.00286084	3	Preservatives, Pharmaceutical	No	No
Indoramin	0.00286084	1	Adrenergic alpha-Antagonists;Antihypertensive Agents	No	No
Aldrin	0.00291764	3	Insecticides	No	No
Cetirizine	0.00294447	9	Anti-Allergic Agents;Histamine H1 Antagonists, Non-Sedating	Yes	No
Benzocaine	0.00311223	3	Anesthetics, Local	No	No
Nitrofurazone	0.00314154	3	Anti-Infective Agents, Local;Trypanocidal Agents;Anti-Infective Agents, Urinary	No	No
Dimethylphenylpiperazinium Iodide	0.00316888	8	Ganglionic Stimulants;Nicotinic Agonists	Yes	No
Antilymphocyte Serum	0.00327815	42	Immunosuppressive Agents;Immunologic Factors	No	No
Ziram	0.00327947	1	Fungicides, Industrial	No	No
Dimaprit	0.00337329	2	Histamine Agonists	No	No
Edeine	0.0034277	2	Anti-Bacterial Agents;Nucleic Acid Synthesis Inhibitors	No	No
Fludrocortisone	0.00362411	12	Anti-Inflammatory Agents	No	No
Charybdotoxin	0.00365499	14	Neurotoxins	Yes	No
Carbofuran	0.00365499	5	Antinematodal Agents;Cholinesterase Inhibitors;Insecticides	No	No
Stanozolol	0.00365499	5	Anabolic Agents;Androgens	No	No
Ether, Ethyl	0.00367413	17	Solvents;Anesthetics, Inhalation	Yes	No
Ivermectin	0.00376807	25	Antiparasitic Agents;Insecticides	No	No
Karaya Gum	0.00381928	1	Tissue Adhesives	No	No
Valinomycin	0.00384839	22	Ionophores;Anti-Bacterial Agents	No	No
Flurazepam	0.00393246	7	Anti-Anxiety Agents;Hypnotics and Sedatives;GABA Modulators	No	No
Nitrendipine	0.00416296	22	Antihypertensive Agents;Vasodilator Agents;Calcium Channel Blockers	Yes	No
Butaclamol	0.00416296	1	Antipsychotic Agents;Dopamine Antagonists	No	No
Labetalol	0.00418149	6	Adrenergic alpha-Antagonists;Sympatholytics;Antihypertensive Agents;Adrenergic beta-Antagonists	No	No
Piracetam	0.00444329	14	Neuroprotective Agents;Nootropic Agents	Yes	No
Aconitine	0.00444329	10	Adjuvants, Immunologic	Yes	No
Nafronyl	0.00466753	1	Serotonin Antagonists;Parasympatholytics;Vasodilator Agents	Yes	No
Pizotyline	0.00490255	5	Antidepressive Agents;Serotonin Antagonists;Analgesics, Non-Narcotic	No	No
Tyrothricin	0.00490343	1	Anti-Bacterial Agents;Anti-Infective Agents, Local	No	No
Natamycin	0.00494977	1	Anti-Infective Agents, Local;Anti-Bacterial Agents;Antifungal Agents	No	No
Sarin	0.00498353	12	Chemical Warfare Agents;Cholinesterase Inhibitors	No	No
Petrolatum	0.00517442	4	Emollients;Ointment Bases	No	No
Anthramycin	0.00531822	2	Antibiotics, Antineoplastic	No	No
Acridine Orange	0.00534304	26	Fluorescent Dyes;Mutagens	Yes	No
Erythritol	0.00534304	9	Vasodilator Agents	No	No
Singlet Oxygen	0.0053629	13	Oxidants	No	No
Patulin	0.00550992	6	Mutagens;Poisons	No	No
Nimodipine	0.00552963	24	Antihypertensive Agents;Vasodilator Agents;Calcium Channel Blockers	Yes	No
Taurolithocholic Acid	0.0059037	2	Cholagogues and Choleretics;Detergents	No	No
Lentinan	0.00602672	3	Adjuvants, Immunologic;Antineoplastic Agents	No	No
Iothalamate Meglumine	0.00615377	2	Contrast Media	No	No
Flucytosine	0.00621574	9	Antifungal Agents;Antimetabolites	No	No
Dicamba	0.00626531	2	Herbicides	No	No
Pyrithiamine	0.00626531	2	Antimetabolites	No	No
Hexobendine	0.00626531	1	Vasodilator Agents	No	No
Tubocurarine	0.00630902	35	Neuromuscular Nondepolarizing Agents;Nicotinic Antagonists	Yes	No
Raclopride	0.00641747	11	Antipsychotic Agents;Dopamine Antagonists	Yes	No
Dimethyl Adipimidate	0.00647454	1	Antisickling Agents;Indicators and Reagents	No	No
Technetium Tc 99M Mertiatide	0.00647458	9	Radiopharmaceuticals	No	No
Phenazocine	0.00706998	9	Analgesics, Opioid;Narcotics	Yes	No
Nevirapine	0.00709114	9	Anti-HIV Agents;Reverse Transcriptase Inhibitors	No	No
Cromolyn Sodium	0.00709405	24	Anti-Asthmatic Agents	No	No
D-Ala(2),Mephe(4),Met(0)-Ol-Enkephalin	0.00715918	4	Analgesics	No	No
Cefotetan	0.00715918	1	Anti-Bacterial Agents	No	No
Isradipine	0.00716361	10	Antihypertensive Agents;Vasodilator Agents;Calcium Channel Blockers	Yes	No
Nystatin	0.00717115	16	Antifungal Agents;Anti-Bacterial Agents;Ionophores	No	No
Oxyclozanide	0.00717115	2	Antiplatyhelmintic Agents	No	No
Clemastine	0.00717115	1	Antipruritics;Histamine H1 Antagonists;Anti-Allergic Agents	No	No
Alprenolol	0.0073024	6	Adrenergic beta-Antagonists;Sympatholytics;Anti-Arrhythmia Agents;Antihypertensive Agents	No	No
Bretylium Tosylate	0.0073024	1	Anti-Arrhythmia Agents;Adrenergic Antagonists;Antihypertensive Agents	No	No
Omega-Agatoxin Iva	0.007304	2	Neurotoxins;Calcium Channel Blockers	Yes	No
Vinca Alkaloids	0.00736004	14	Tubulin Modulators;Antineoplastic Agents	Yes	No
Methimazole	0.00743123	20	Antithyroid Agents	No	No
Orciprenaline	0.00763367	6	Adrenergic beta-Agonists;Tocolytic Agents;Bronchodilator Agents;Sympathomimetics	No	No
3,4-Methylenedioxyamphetamine	0.00768025	9	Hallucinogens;Serotonin Agents;Adrenergic Uptake Inhibitors	Yes	No
Ciguatoxins	0.00782042	3	Poisons	No	No
Sodium Hypochlorite	0.00783941	15	Disinfectants;Oxidants	No	No
Bupranolol	0.00788703	3	Adrenergic beta-Antagonists;Antihypertensive Agents;Anti-Arrhythmia Agents	No	No
Carubicin	0.00799384	1	Antibiotics, Antineoplastic	No	No
Cefmetazole	0.00799384	1	Anti-Bacterial Agents	No	No
Obidoxime Chloride	0.00808513	2	Cholinesterase Reactivators	No	No
Sulfalene	0.00808513	2	Anti-Infective Agents;Anti-Infective Agents, Urinary;Antimalarials	No	No
Luciferases, Firefly	0.00808513	1	Luminescent Agents	No	No
Misonidazole	0.00828501	4	Antineoplastic Agents;Radiation-Sensitizing Agents;Antiprotozoal Agents	No	No
Amaranth Dye	0.00841736	2	Coloring Agents;Indicators and Reagents	No	No
Phleomycins	0.00841736	2	Antibiotics, Antineoplastic;Nucleic Acid Synthesis Inhibitors	No	No
Dimethoate	0.00854441	4	Cholinesterase Inhibitors;Insecticides	No	No
P-Aminoazobenzene	0.00854441	3	Coloring Agents	No	No
Rosaniline Dyes	0.00893185	21	Coloring Agents	Yes	No
Pentazocine	0.00897509	10	Analgesics, Opioid;Narcotic Antagonists;Narcotics;Adjuvants, Anesthesia	No	No
Complement C1S	0.00908282	15	Immunologic Factors	Yes	No
Sparteine	0.00936158	3	Oxytocics;Anti-Arrhythmia Agents	No	No
Alfentanil	0.00937944	13	Narcotics;Anesthetics, Intravenous;Analgesics, Opioid	No	No
Benztropine	0.00954954	3	Antiparkinson Agents;Muscarinic Antagonists;Dopamine Uptake Inhibitors;Parasympatholytics	Yes	No
Heparin, Low-Molecular-Weight	0.00997135	26	Anticoagulants;Fibrinolytic Agents	Yes	No
Sparsomycin	0.00997135	2	Antibiotics, Antineoplastic;Protein Synthesis Inhibitors	No	No
Dimethadione	0.00997135	1	Anticonvulsants	No	No
Nadolol	0.010052	5	Adrenergic beta-Antagonists;Antihypertensive Agents;Anti-Arrhythmia Agents;Sympatholytics	No	No
Evans Blue	0.0101325	22	Coloring Agents	Yes	No
Eosine I Bluish	0.0103122	1	Fluorescent Dyes	No	No
Neuroleukin	0.0103122	1	Growth Substances	No	No
Aflatoxin M1	0.0114617	3	Poisons	No	No
Xylitol	0.011482	11	Sweetening Agents	No	No
Miocamycin	0.0117848	1	Anti-Bacterial Agents	No	No
Probenecid	0.0121111	17	Uricosuric Agents;Adjuvants, Pharmaceutic	Yes	No
Proscillaridin	0.012209	2	Enzyme Inhibitors;Cardiotonic Agents	No	No
Cefmenoxime	0.0127841	2	Anti-Bacterial Agents	No	No
Chlormethiazole	0.0131349	6	Anticonvulsants;Neuroprotective Agents;GABA Modulators;Hypnotics and Sedatives	Yes	No
Mustard Gas	0.0131349	6	Chemical Warfare Agents;Dermatologic Agents	No	No
Radon Daughters	0.0131568	6	Carcinogens, Environmental	Yes	No
Heptachlor	0.0137863	5	Soil Pollutants;Insecticides	No	No
Mazindol	0.0139765	3	Central Nervous System Stimulants;Adrenergic Uptake Inhibitors;Dopamine Uptake Inhibitors	Yes	No
Ambenonium Chloride	0.0139765	1	Cholinesterase Inhibitors;Parasympathomimetics	Yes	No
Apazone	0.0139765	2	Anti-Inflammatory Agents, Non-Steroidal;Uricosuric Agents	No	No
Sulfapyridine	0.0145494	1	Anti-Infective Agents;Dermatologic Agents	No	No
Aspartame	0.0146734	7	Sweetening Agents	Yes	No
Sodium Hydroxide	0.0150757	23	Caustics	Yes	No
Beta-Naphthoflavone	0.0151536	12	Enzyme Inhibitors	No	No
Gamma-Tocopherol	0.0153806	2	Antioxidants;Vitamins	Yes	No
Omeprazole	0.0164528	27	Anti-Ulcer Agents;Enzyme Inhibitors	Yes	No
Diflucortolone	0.0166273	1	Anti-Inflammatory Agents;Glucocorticoids	No	No
Methyclothiazide	0.0166273	1	Diuretics;Sodium Chloride Symporter Inhibitors	No	No
Enviomycin	0.0169087	1	Anti-Bacterial Agents;Antibiotics, Antitubercular	No	No
Trimetrexate	0.016985	4	Antifungal Agents;Antimetabolites, Antineoplastic;Folic Acid Antagonists	No	No
Unithiol	0.0171146	3	Chelating Agents;Antidotes	No	No
Lasalocid	0.0171322	6	Coccidiostats;Ionophores;Anti-Bacterial Agents	No	No
Carbaryl	0.0171635	8	Cholinesterase Inhibitors;Insecticides	No	No
Dimethylhydrazines	0.0172335	13	Carcinogens	No	No
Silver Proteins	0.0172335	1	Anti-Infective Agents, Local	No	No
Xamoterol	0.0172448	2	Adrenergic beta-Agonists;Sympathomimetics;Cardiotonic Agents	No	No
Dichlorvos	0.0172916	8	Anthelmintics;Insecticides;Cholinesterase Inhibitors	Yes	No
Oxythiamine	0.0174446	2	Antimetabolites	No	No
Meclofenoxate	0.0176257	5	Nootropic Agents;Neuroprotective Agents	Yes	No
Levallorphan	0.0185593	4	Narcotic Antagonists	No	No
Chlorzoxazone	0.0186882	6	Muscle Relaxants, Central	No	No
Tolbutamide	0.0191175	24	Hypoglycemic Agents	No	No
Calcium Sulfate	0.0194561	7	Dental Materials	No	No
Emetine	0.0197402	12	Antinematodal Agents;Protein Synthesis Inhibitors;Amebicides	No	No
Amrinone	0.0199728	3	Calcium Channel Blockers;Cardiotonic Agents;Phosphodiesterase Inhibitors;Vasodilator Agents	No	No
Ipecac	0.020045	6	Emetics	No	No
Triaziquone	0.0201052	2	Antineoplastic Agents, Alkylating	No	No
Beta-Defensins	0.0215014	8	Anti-Infective Agents	No	No
Chlordan	0.0217318	6	Insecticides	No	No
Luminol	0.0219598	13	Indicators and Reagents	Yes	No
Lactose	0.0219845	88	Sweetening Agents	No	No
Methyltestosterone	0.0222368	4	Antineoplastic Agents, Hormonal;Anabolic Agents	No	No
Norethynodrel	0.0226818	3	Contraceptives, Oral, Synthetic	No	No
Encainide	0.022991	1	Anti-Arrhythmia Agents;Sodium Channel Blockers	No	No
Humic Substances	0.0239991	9	Chelating Agents	No	No
Oxamniquine	0.0241169	1	Schistosomicides	No	No
Testolactone	0.024202	3	Antineoplastic Agents, Hormonal	No	No
Amygdalin	0.024202	1	Antineoplastic Agents, Phytogenic	No	No
Silver Sulfadiazine	0.0243467	1	Anti-Infective Agents, Local	No	No
Bromthymol Blue	0.0249779	1	Coloring Agents;Indicators and Reagents	No	No
Pentobarbital	0.0250669	75	Adjuvants, Anesthesia;Hypnotics and Sedatives;GABA Modulators	Yes	No
Pyroglobulins	0.0264828	1	Immunologic Factors	No	No
Pyrrolnitrin	0.0264828	1	Antibiotics, Antifungal	No	No
Milrinone	0.0272755	11	Cardiotonic Agents;Vasodilator Agents;Platelet Aggregation Inhibitors;Phosphodiesterase Inhibitors	No	No
Chromomycins	0.0293465	2	Antibiotics, Antineoplastic;Nucleic Acid Synthesis Inhibitors	No	No
Kassinin	0.0294139	3	Neurotransmitter Agents	No	No
Trifluperidol	0.0294139	2	Antipsychotic Agents;Dopamine Antagonists	No	No
Defensins	0.0295427	16	Anti-Infective Agents	No	No
Thiabendazole	0.0295427	15	Antinematodal Agents	No	No
Amoxapine	0.0300924	1	Neurotransmitter Uptake Inhibitors;Dopamine Antagonists;Adrenergic Uptake Inhibitors;Antidepressive Agents, Second-Generation;Serotonin Uptake Inhibitors	No	No
Bisacodyl	0.0300924	1	Cathartics	No	No
Ritodrine	0.0302291	2	Adrenergic beta-Agonists;Sympathomimetics;Tocolytic Agents	No	No
Dehydroascorbic Acid	0.0312216	8	Vitamins	No	No
Levonorgestrel	0.0321155	12	Contraceptive Agents, Female;Contraceptives, Oral, Synthetic	Yes	No
Long-Acting Thyroid Stimulator	0.0325413	3	Immunologic Factors	No	No
Ursodeoxycholic Acid	0.032632	19	Cholagogues and Choleretics	Yes	No
Radon	0.032692	27	Air Pollutants, Radioactive;Carcinogens, Environmental	Yes	No
Piperoxan	0.032905	2	Adrenergic alpha-Antagonists;Antihypertensive Agents	No	No
Trazodone	0.0330192	9	Anti-Anxiety Agents;Antidepressive Agents, Second-Generation;Serotonin Uptake Inhibitors	Yes	No
Chlorphenamidine	0.0337143	2	Insecticides;Uncoupling Agents;Monoamine Oxidase Inhibitors	No	No
Dihydroalprenolol	0.0341241	6	Adrenergic beta-Antagonists;Anti-Arrhythmia Agents;Antihypertensive Agents;Sympatholytics	Yes	No
Busulfan	0.0346264	16	Immunosuppressive Agents;Alkylating Agents;Myeloablative Agonists;Antineoplastic Agents, Alkylating	No	No
Chlordiazepoxide	0.034653	27	Hypnotics and Sedatives;Adjuvants, Anesthesia;GABA Modulators;Anti-Anxiety Agents	No	No
Loratadine	0.03532	6	Antipruritics;Anti-Allergic Agents;Histamine H1 Antagonists, Non-Sedating	No	No
Aurovertins	0.0355926	1	Indicators and Reagents;Uncoupling Agents	No	No
Albendazole	0.0366765	9	Anticestodal Agents;Tubulin Modulators;Anthelmintics;Antiprotozoal Agents	No	No
Methysergide	0.0367375	28	Vasoconstrictor Agents;Serotonin Antagonists	No	No
Oxazepam	0.0367877	6	Hypnotics and Sedatives;GABA Modulators;Anti-Anxiety Agents	Yes	No
Diazinon	0.0367917	5	Cholinesterase Inhibitors;Insecticides	No	No
Clotrimazole	0.0373041	12	Anti-Infective Agents, Local;Antifungal Agents;Growth Inhibitors	No	No
Gallamine Triethiodide	0.0380417	8	Neuromuscular Nondepolarizing Agents;Nicotinic Antagonists	Yes	No
Pentolinium Tartrate	0.0389932	5	Antihypertensive Agents;Ganglionic Blockers;Nicotinic Antagonists	No	No
Galantamine	0.0396219	6	Cholinesterase Inhibitors;Nootropic Agents;Parasympathomimetics	Yes	Yes
Carbamazepine	0.0401075	59	Analgesics, Non-Narcotic;Anticonvulsants;Antimanic Agents	Yes	No
Perphenazine	0.0407123	13	Antipsychotic Agents;Dopamine Antagonists	Yes	No
Aprindine	0.0410242	1	Anti-Arrhythmia Agents	No	No
Tartrazine	0.0414185	1	Food Coloring Agents;Coloring Agents	No	No
Muzolimine	0.0419911	1	Antihypertensive Agents;Diuretics	No	No
Leptophos	0.0421269	1	Insecticides	No	No
O-Phthalaldehyde	0.0422796	8	Disinfectants;Indicators and Reagents;Enzyme Inhibitors	No	No
Calcifediol	0.0427246	14	Vitamins;Bone Density Conservation Agents	No	No
Amobarbital	0.0431939	11	Hypnotics and Sedatives;GABA Modulators	No	No
Nisin	0.0440058	5	Anti-Bacterial Agents	No	No
Niceritrol	0.0440064	1	Antilipemic Agents	No	No
Guaiacol	0.0441313	5	Disinfectants;Expectorants	No	No
Oxazolidinones	0.0444939	7	Anti-Infective Agents;Protein Synthesis Inhibitors	No	No
Fonofos	0.0449109	1	Cholinesterase Inhibitors;Insecticides	No	No
Thimerosal	0.0452817	8	Antifungal Agents;Preservatives, Pharmaceutical;Anti-Infective Agents, Local	No	No
Tocainide	0.0454616	2	Anti-Arrhythmia Agents	No	No
Tolmetin	0.045636	4	Anti-Inflammatory Agents, Non-Steroidal;Cyclooxygenase Inhibitors	No	No
Technetium Tc 99M Dimercaptosuccinic Acid	0.046307	6	Radiopharmaceuticals	No	No
6-Aminonicotinamide	0.046307	1	Teratogens	No	No
Phloroglucinol	0.0464077	4	Parasympatholytics;Indicators and Reagents	No	No
Acarbose	0.0467176	4	Enzyme Inhibitors;Hypoglycemic Agents	No	No
Senna Extract	0.0478291	2	Cathartics	No	No
Gentian Violet	0.0479363	8	Anti-Infective Agents, Local	No	No
Ipodate	0.0494117	1	Contrast Media	No	No
Aequorin	0.0508243	14	Luminescent Agents	Yes	No
Loxapine	0.0519026	1	Antipsychotic Agents;Dopamine Antagonists	Yes	No
Fusaric Acid	0.0519026	1	Enzyme Inhibitors;Nucleic Acid Synthesis Inhibitors;Dopamine Agents	No	No
Ofloxacin	0.0520315	30	Anti-Infective Agents, Urinary;Anti-Bacterial Agents	No	No
Triparanol	0.0523596	1	Antilipemic Agents	No	No
Butoxamine	0.0528178	2	Antilipemic Agents;Adrenergic beta-Antagonists;Sympatholytics;Hypoglycemic Agents	No	No
Trypan Blue	0.0535521	33	Antiprotozoal Agents;Coloring Agents	Yes	No
Oxyphenbutazone	0.0537068	5	Anti-Inflammatory Agents, Non-Steroidal	No	No
Allantoin	0.0541349	9	Dermatologic Agents	No	No
Cellulose, Oxidized	0.0543097	3	Hemostatics	No	No
Piribedil	0.0554653	3	Antiparkinson Agents;Dopamine Agonists	No	No
Cephamycins	0.0558039	5	Anti-Bacterial Agents	No	No
Phenmetrazine	0.0561383	1	Central Nervous System Stimulants;Sympathomimetics;Appetite Depressants	No	No
Hexadimethrine	0.0564361	3	Heparin Antagonists	No	No
Podophyllin	0.058323	7	Antineoplastic Agents, Phytogenic;Caustics;Keratolytic Agents	No	No
Sulfinpyrazone	0.0589803	4	Uricosuric Agents	No	No
Gabexate	0.0598704	4	Anticoagulants;Serine Proteinase Inhibitors	No	No
Protriptyline	0.0599842	1	Adrenergic Uptake Inhibitors;Antidepressive Agents, Tricyclic	No	No
Phenelzine	0.0617782	12	Monoamine Oxidase Inhibitors;Antidepressive Agents	No	No
Azinphosmethyl	0.0620338	1	Cholinesterase Inhibitors;Insecticides	No	No
Triacetin	0.0620338	1	Anti-Infective Agents, Local;Antifungal Agents	No	No
Tetrabenazine	0.0638384	7	Anti-Dyskinesia Agents;Adrenergic Uptake Inhibitors;Affinity Labels	Yes	No
N,N-Dimethyltryptamine	0.0639481	2	Hallucinogens;Serotonin Agonists;Serotonin Antagonists	No	No
Bromphenol Blue	0.0639631	2	Coloring Agents;Indicators and Reagents	No	No
Butylated Hydroxyanisole	0.0646846	8	Antioxidants;Carcinogens	No	No
Iothalamic Acid	0.0652355	13	Contrast Media	No	No
Mesterolone	0.0657498	1	Anabolic Agents	No	No
Hepes	0.0682571	12	Buffers	No	No
Phentermine	0.0702272	2	Central Nervous System Stimulants;Appetite Depressants;Sympathomimetics;Adrenergic Agents	No	No
Methomyl	0.0704942	2	Insecticides;Cholinesterase Inhibitors	No	No
Sumatriptan	0.0709824	13	Vasoconstrictor Agents;Serotonin Agonists	Yes	No
Toluene	0.0710438	42	Solvents	Yes	No
Triclosan	0.073765	2	Anti-Infective Agents, Local	No	No
Gestrinone	0.0740533	1	Contraceptives, Oral;Progestins	No	No
Glutaral	0.0741089	43	Disinfectants;Cross-Linking Reagents;Fixatives	Yes	No
Menthol	0.074474	10	Antipruritics	No	No
Iodipamide	0.0746586	2	Contrast Media	No	No
Dinitrochlorobenzene	0.0768824	11	Indicators and Reagents;Irritants	No	No
Hydralazine	0.0769183	28	Antihypertensive Agents;Vasodilator Agents	No	No
Phenazopyridine	0.0776251	2	Anesthetics, Local	No	No
Cord Factors	0.0776251	1	Adjuvants, Immunologic	No	No
Tobramycin	0.0781915	22	Anti-Bacterial Agents	No	No
Indinavir	0.0786183	9	HIV Protease Inhibitors	No	No
Pyrantel	0.0791038	3	Antinematodal Agents;Neuromuscular Depolarizing Agents	No	No
2-Propanol	0.0809202	4	Solvents	No	No
Prenalterol	0.0822867	3	Adrenergic beta-Agonists;Cardiotonic Agents;Sympathomimetics	No	No
Oxymorphone	0.082585	2	Analgesics, Opioid;Adjuvants, Anesthesia;Narcotics	No	No
Methiothepin	0.0827142	6	Serotonin Antagonists;Antipsychotic Agents	No	No
Mephentermine	0.0833116	1	Adrenergic alpha-Agonists;Adrenergic Agents;Sympathomimetics;Vasoconstrictor Agents	No	No
Triamcinolone Acetonide	0.0843951	18	Anti-Inflammatory Agents;Glucocorticoids;Immunosuppressive Agents	No	No
Glycerol	0.0852296	186	Cryoprotective Agents	Yes	No
Ferrozine	0.0854737	2	Indicators and Reagents;Iron Chelating Agents	No	No
Erythromycin Ethylsuccinate	0.0887617	1	Enzyme Inhibitors;Gastrointestinal Agents;Protein Synthesis Inhibitors;Anti-Bacterial Agents	No	No
Bufotenin	0.0890548	3	Hallucinogens;Serotonin Antagonists	No	No
Dexmedetomidine	0.0899835	6	Hypnotics and Sedatives;Analgesics, Non-Narcotic;Adrenergic alpha-Agonists	No	No
Methiocarb	0.0906076	1	Insecticides;Molluscacides	No	No
Nitroarginine	0.0932768	64	Enzyme Inhibitors	Yes	No
Granisetron	0.0934487	4	Antiemetics;Serotonin Antagonists	No	No
Prilocaine	0.0943899	7	Anesthetics, Local	No	No
Aminopterin	0.0946848	7	Folic Acid Antagonists	No	No
Glutethimide	0.0964551	3	Hypnotics and Sedatives	No	No
Clavulanic Acids	0.096586	15	Anti-Bacterial Agents;Enzyme Inhibitors	No	No
Mesna	0.0989534	9	Protective Agents;Expectorants	No	No
Pilocarpine	0.100291	36	Miotics;Muscarinic Agonists	Yes	No
Methyl Parathion	0.100959	3	Cholinesterase Inhibitors;Insecticides	No	No
Mevinphos	0.101262	1	Cholinesterase Inhibitors;Insecticides	No	No
Chlorpropham	0.102669	1	Herbicides;Plant Growth Regulators	No	No
Cefotiam	0.105969	3	Anti-Bacterial Agents	No	No
Felypressin	0.107428	1	Vasoconstrictor Agents	No	No
Pyrantel Pamoate	0.107428	1	Antinematodal Agents	No	No
Mesalamine	0.107617	11	Anti-Inflammatory Agents, Non-Steroidal	No	No
Bromouracil	0.108921	3	Antimetabolites;Mutagens	No	No
Amodiaquine	0.109271	4	Antimalarials	Yes	No
Santonin	0.109478	1	Antinematodal Agents	No	No
Piroxicam	0.109486	17	Anti-Inflammatory Agents, Non-Steroidal;Cyclooxygenase Inhibitors	No	No
Almitrine	0.110107	2	Respiratory System Agents	No	No
Famotidine	0.110916	9	Anti-Ulcer Agents;Histamine H2 Antagonists	No	No
Oxandrolone	0.111337	2	Anabolic Agents;Androgens	No	No
Triethylenetetramine	0.112931	3	Chelating Agents;Indicators and Reagents	No	No
Metiamide	0.113409	2	Anti-Ulcer Agents;Histamine H2 Antagonists	No	No
Trimipramine	0.113409	2	Antidepressive Agents, Tricyclic;Adrenergic Uptake Inhibitors	No	No
Acepromazine	0.114816	2	Antipsychotic Agents;Dopamine Antagonists	No	No
Cyproheptadine	0.115618	16	Anti-Allergic Agents;Gastrointestinal Agents;Histamine H1 Antagonists;Antipruritics;Serotonin Antagonists	No	No
Spectinomycin	0.116709	12	Anti-Bacterial Agents	No	No
Chloroguanide	0.116904	4	Antimetabolites;Antimalarials	No	No
Kitasamycin	0.116904	1	Anti-Bacterial Agents	No	No
Calcium Hydroxide	0.118258	11	Bone Cements	No	No
Pyrazinamide	0.119246	12	Antitubercular Agents	No	No
Bepridil	0.120265	6	Anti-Arrhythmia Agents;Antihypertensive Agents;Vasodilator Agents;Calcium Channel Blockers	No	No
Nelfinavir	0.12055	8	HIV Protease Inhibitors	Yes	No
Disulfiram	0.123626	14	Enzyme Inhibitors;Alcohol Deterrents	No	No
Triprolidine	0.124184	3	Histamine H1 Antagonists;Anti-Allergic Agents	No	No
Picloram	0.124484	2	Herbicides	No	No
Clorazepate Dipotassium	0.125263	3	Anticonvulsants;Anti-Anxiety Agents;GABA Modulators	No	No
Acebutolol	0.126434	5	Adrenergic beta-Antagonists;Anti-Arrhythmia Agents;Antihypertensive Agents	No	No
Heptachlor Epoxide	0.126434	2	Insecticides	No	No
Impromidine	0.126434	1	Histamine Agonists	No	No
Thebaine	0.126778	1	Narcotics;Convulsants	No	No
Praziquantel	0.127916	16	Anthelmintics	No	No
Niflumic Acid	0.130799	5	Anti-Inflammatory Agents, Non-Steroidal;Cyclooxygenase Inhibitors	No	No
Tetrahydrouridine	0.13138	1	Antimetabolites	No	No
Endrin	0.134461	2	Insecticides	No	No
Exfoliatins	0.135954	3	Dermotoxins	No	No
Tetraphenylborate	0.135954	3	Indicators and Reagents;Uncoupling Agents	No	No
Ergothioneine	0.135954	2	Antioxidants	No	No
Technetium Tc 99M Pyrophosphate	0.136209	6	Radiopharmaceuticals	No	No
Benactyzine	0.136209	4	Antidepressive Agents;Parasympatholytics;Muscarinic Antagonists	No	No
Phorate	0.138905	2	Cholinesterase Inhibitors;Insecticides	No	No
Nizatidine	0.138905	1	Anti-Ulcer Agents;Histamine H2 Antagonists	No	No
Menogaril	0.139096	2	Antibiotics, Antineoplastic	No	No
Benzyl Alcohol	0.141798	7	Anesthetics, Local	No	No
Tetracycline	0.142206	151	Protein Synthesis Inhibitors;Anti-Bacterial Agents	Yes	No
Benzoic Acid	0.143549	30	Food Preservatives	No	No
Hydroxocobalamin	0.143972	5	Vitamin B Complex;Hematinics	Yes	No
Dihydroergotamine	0.144153	8	Dopamine Agonists;Analgesics, Non-Narcotic;Vasoconstrictor Agents	No	No
Naproxen	0.148517	17	Anti-Inflammatory Agents, Non-Steroidal;Gout Suppressants;Cyclooxygenase Inhibitors	Yes	No
Buprenorphine	0.149752	10	Analgesics, Opioid;Narcotics;Narcotic Antagonists	No	No
Iodophors	0.152376	2	Surface-Active Agents	No	No
16,16-Dimethylprostaglandin E2	0.152689	3	Anti-Ulcer Agents	No	No
Psilocybine	0.153831	1	Hallucinogens	No	No
Arabinofuranosylcytosine Triphosphate	0.153951	2	Nucleic Acid Synthesis Inhibitors	No	No
Canrenoate Potassium	0.153951	2	Aldosterone Antagonists	No	No
Maytansine	0.153951	2	Antineoplastic Agents, Phytogenic;Tubulin Modulators	No	No
Propylbenzilylcholine Mustard	0.153951	2	Affinity Labels;Muscarinic Antagonists	No	No
Nylidrin	0.153951	1	Adrenergic beta-Agonists;Sympathomimetics;Vasodilator Agents;Tocolytic Agents	No	No
Acetazolamide	0.15562	36	Anticonvulsants;Diuretics;Carbonic Anhydrase Inhibitors	Yes	No
Auranofin	0.156203	5	Antirheumatic Agents	No	No
Erythrosine	0.162325	5	Fluorescent Dyes	No	No
Pancuronium	0.162495	15	Nicotinic Antagonists;Neuromuscular Nondepolarizing Agents	No	No
Mephenesin	0.162495	1	Muscle Relaxants, Central	No	No
Selenious Acid	0.166883	4	Antioxidants	No	No
Cantharidin	0.16872	4	Enzyme Inhibitors;Irritants	No	No
Hepatitis Antibodies	0.168984	27	Immunologic Factors	No	No
Medazepam	0.168984	2	Anticonvulsants;Muscle Relaxants, Central;Anti-Anxiety Agents;Hypnotics and Sedatives;GABA Modulators	No	No
Oxycodone	0.171725	3	Antitussive Agents;Narcotics;Analgesics, Opioid	No	No
Lorazepam	0.172867	12	Anticonvulsants;Hypnotics and Sedatives;Antiemetics;Anti-Anxiety Agents;GABA Modulators	Yes	No
Thioacetazone	0.172959	3	Antitubercular Agents	No	No
Biuret	0.173793	2	Indicators and Reagents	No	No
Aflatoxin B1	0.175425	22	Poisons	No	No
Tramadol	0.176493	6	Analgesics, Opioid;Narcotics	No	No
Pulmonary Surfactant-Associated Proteins	0.176701	15	Pulmonary Surfactants	No	No
Xylazine	0.177934	9	Adrenergic alpha-Agonists	No	No
Cycloserine	0.18259	13	Anti-Infective Agents, Urinary;Antibiotics, Antitubercular;Antimetabolites	Yes	No
Hydrogen Cyanide	0.182794	7	Chemical Warfare Agents	No	No
Idoxuridine	0.183634	15	Antiviral Agents;Nucleic Acid Synthesis Inhibitors	No	No
Propoxur	0.184179	4	Insecticides;Cholinesterase Inhibitors	No	No
Troleandomycin	0.184179	3	Anti-Bacterial Agents	No	No
Cetylpyridinium	0.185185	3	Anti-Infective Agents, Local;Detergents	No	No
Poly A-U	0.185185	3	Adjuvants, Immunologic;Antiviral Agents;Interferon Inducers	No	No
Hexylresorcinol	0.185666	1	Anti-Infective Agents, Local;Antiplatyhelmintic Agents;Antinematodal Agents	No	No
Sulbenicillin	0.188396	1	Anti-Bacterial Agents	No	No
Oxymetazoline	0.189358	8	Adrenergic alpha-Agonists;Sympathomimetics;Nasal Decongestants	No	No
Chromonar	0.194408	1	Vasodilator Agents	No	No
Calcium Carbonate	0.196328	21	Antacids	No	No
Trinitrotoluene	0.196922	4	Explosive Agents	No	No
Clorgyline	0.197636	4	Antidepressive Agents;Monoamine Oxidase Inhibitors	Yes	No
Trioxsalen	0.198846	4	Photosensitizing Agents	No	No
Cinnarizine	0.200923	5	Calcium Channel Blockers;Histamine H1 Antagonists	No	No
Calcium, Dietary	0.20316	39	Bone Density Conservation Agents	No	No
Anistreplase	0.203944	2	Fibrinolytic Agents	No	No
Mupirocin	0.204862	5	Anti-Bacterial Agents	No	No
Trimebutine	0.209164	1	Gastrointestinal Agents;Parasympatholytics	No	No
Pergolide	0.209472	8	Dopamine Agonists;Neuroprotective Agents;Antiparkinson Agents	No	No
Maleic Hydrazide	0.20989	2	Herbicides;Plant Growth Regulators	No	No
Dehydrocholic Acid	0.20989	1	Gastrointestinal Agents;Diuretics	No	No
Rose Bengal	0.211151	17	Fluorescent Dyes	No	No
Azlocillin	0.213145	3	Anti-Bacterial Agents	No	No
Sodium Nitrite	0.213557	9	Food Preservatives;Indicators and Reagents	No	No
Ethionine	0.216815	11	Antimetabolites	Yes	No
Fenthion	0.218025	3	Cholinesterase Inhibitors;Insecticides	No	No
Dapsone	0.220009	20	Anti-Inflammatory Agents, Non-Steroidal;Folic Acid Antagonists;Leprostatic Agents;Anti-Infective Agents;Antimalarials	Yes	No
Pentamidine	0.221214	11	Antifungal Agents;Antiprotozoal Agents;Trypanocidal Agents	No	No
Perhexiline	0.222908	1	Calcium Channel Blockers;Cardiovascular Agents;Vasodilator Agents	No	No
Diphtheria Antitoxin	0.228653	3	Immunologic Factors	No	No
Neutral Red	0.229732	9	Indicators and Reagents;Coloring Agents	Yes	No
Tetracaine	0.23062	18	Anesthetics, Local	No	No
Chlorfenvinphos	0.23062	2	Cholinesterase Inhibitors;Insecticides	No	No
Pancreatin	0.232327	7	Gastrointestinal Agents	No	No
Tocotrienols	0.2349	2	Vitamins;Antioxidants	No	No
Loperamide	0.238512	4	Antidiarrheals	No	No
Fish Venoms	0.238512	2	Poisons	No	No
Immunoglobulin Delta-Chains	0.238512	2	Immunologic Factors	No	No
Maneb	0.238512	1	Fungicides, Industrial	No	No
Sulfacetamide	0.238512	1	Anti-Infective Agents, Urinary;Anti-Infective Agents, Local	No	No
Tiletamine	0.238512	1	Anesthetics, Dissociative;Anticonvulsants	No	No
Nortriptyline	0.238911	15	Adrenergic Uptake Inhibitors;Antidepressive Agents, Tricyclic	Yes	No
Miconazole	0.252721	8	Antifungal Agents	No	No
Dihydrouracil Dehydrogenase (Nadp)	0.253574	2	Antineoplastic Agents	No	No
Ambroxol	0.254242	1	Expectorants	No	No
Lithium Carbonate	0.255974	14	Antidepressive Agents;Enzyme Inhibitors;Antimanic Agents;Antithyroid Agents	Yes	No
Bucrylate	0.257959	2	Tissue Adhesives	No	No
Midazolam	0.26207	28	Adjuvants, Anesthesia;Hypnotics and Sedatives;Anti-Anxiety Agents;GABA Modulators;Anesthetics, Intravenous	Yes	No
Pyrimethamine	0.264859	26	Antimalarials;Antiprotozoal Agents;Folic Acid Antagonists	Yes	No
Metrizoate	0.269031	2	Contrast Media	No	No
Cyproterone	0.269433	16	Androgen Antagonists	No	No
Melarsoprol	0.272797	1	Trypanocidal Agents	No	No
Tetrathionic Acid	0.272797	1	Indicators and Reagents	No	No
Cobamides	0.278132	4	Vitamin B Complex	No	No
Norethindrone	0.28611	28	Contraceptives, Oral, Synthetic	No	No
Gold Sodium Thiomalate	0.286501	8	Antirheumatic Agents	No	No
Alpha-Endorphin	0.286501	1	Neurotransmitter Agents	No	No
Mephobarbital	0.286501	1	Anticonvulsants;Hypnotics and Sedatives;GABA Modulators	No	No
Ronidazole	0.286501	1	Antiprotozoal Agents	No	No
Sulfaquinoxaline	0.286501	1	Antiprotozoal Agents;Anti-Infective Agents	No	No
Endosulfan	0.289073	6	Insecticides	No	No
Nicergoline	0.289758	2	Adrenergic alpha-Antagonists;Vasodilator Agents;Nootropic Agents	Yes	No
Enoximone	0.289758	2	Cardiotonic Agents;Phosphodiesterase Inhibitors;Vasodilator Agents	No	No
Beta-Msh	0.290902	1	Hormones	No	No
Spironolactone	0.291243	24	Diuretics;Aldosterone Antagonists	Yes	No
Trichloroethylene	0.299829	17	Solvents;Anesthetics, Inhalation	No	No
Acriflavine	0.305132	5	Anti-Infective Agents, Local;Fluorescent Dyes;Intercalating Agents	No	No
Dichlorodiphenyldichloroethane	0.307707	3	Insecticides	No	No
Lynestrenol	0.308057	5	Contraceptives, Oral, Synthetic	No	No
Fluorometholone	0.308057	2	Anti-Inflammatory Agents;Glucocorticoids;Anti-Allergic Agents	No	No
Norethandrolone	0.308057	1	Anabolic Agents	No	No
Trimeprazine	0.308057	1	Antipruritics	No	No
Zolazepam	0.308057	1	Anti-Anxiety Agents;GABA Modulators	No	No
Dihydrostreptomycin Sulfate	0.308478	3	Anti-Bacterial Agents	No	No
Bromisovalum	0.310844	1	Hypnotics and Sedatives	No	No
Dienestrol	0.310844	1	Estrogens, Non-Steroidal	No	No
Echinomycin	0.319572	2	Nucleic Acid Synthesis Inhibitors;Antibiotics, Antineoplastic;Anti-Bacterial Agents	No	No
Iofetamine	0.319644	4	Radiopharmaceuticals	Yes	No
Maprotiline	0.322832	8	Adrenergic Uptake Inhibitors;Antidepressive Agents, Second-Generation	Yes	No
Peracetic Acid	0.326129	4	Disinfectants;Oxidants	No	No
Riboflavin	0.326379	39	Photosensitizing Agents;Vitamin B Complex	Yes	No
Ethylmorphine	0.326856	4	Analgesics, Opioid;Antitussive Agents;Narcotics	No	No
Hepatitis B Antibodies	0.327582	37	Immunologic Factors	No	No
Croton Oil	0.330258	6	Dermatologic Agents	No	No
Metoprolol	0.330641	32	Adrenergic beta-Antagonists;Antihypertensive Agents;Sympatholytics;Anti-Arrhythmia Agents	Yes	No
Dexetimide	0.332913	1	Antiparkinson Agents;Muscarinic Antagonists;Parasympatholytics	Yes	No
Niridazole	0.332913	2	Amebicides;Schistosomicides	No	No
Ampyrone	0.332913	1	Anti-Inflammatory Agents, Non-Steroidal;Indicators and Reagents	No	No
Imidocarb	0.332913	1	Antiprotozoal Agents	No	No
Mopidamol	0.332913	1	Antineoplastic Agents	No	No
Mefloquine	0.336591	8	Antimalarials	No	No
Nimustine	0.338301	6	Antineoplastic Agents	No	No
Clavulanic Acid	0.344274	16	Anti-Bacterial Agents;Enzyme Inhibitors	No	No
Lidocaine	0.351955	105	Anesthetics, Local;Anti-Arrhythmia Agents	Yes	No
Oxypurinol	0.35291	2	Enzyme Inhibitors	No	No
Ornidazole	0.354247	1	Antitrichomonal Agents;Amebicides;Radiation-Sensitizing Agents	No	No
Mezlocillin	0.354479	4	Anti-Bacterial Agents	No	No
Immunoconglutinins	0.355094	1	Immunologic Factors	No	No
Propyl Gallate	0.356316	3	Antioxidants	Yes	No
Tiapride	0.356485	2	Antipsychotic Agents;Dopamine Antagonists;Anti-Dyskinesia Agents	Yes	No
Propiolactone	0.356485	2	Disinfectants	No	No
Tyramine	0.358287	37	Sympathomimetics;Adrenergic Uptake Inhibitors	Yes	No
Sotalol	0.359055	10	Adrenergic beta-Antagonists;Anti-Arrhythmia Agents;Sympatholytics	No	No
Warfarin	0.366013	61	Rodenticides;Anticoagulants	Yes	No
Etomidate	0.366013	7	Hypnotics and Sedatives;Anesthetics, Intravenous	No	No
Pantothenic Acid	0.36691	9	Vitamin B Complex	Yes	No
Cosyntropin	0.37264	8	Hormones	No	No
Cephapirin	0.37264	1	Anti-Bacterial Agents	No	No
Saquinavir	0.384536	6	HIV Protease Inhibitors	Yes	No
Trifluralin	0.391076	1	Tubulin Modulators;Herbicides	No	No
Propafenone	0.398279	5	Anti-Arrhythmia Agents	No	No
Ketorolac	0.400428	4	Anti-Inflammatory Agents, Non-Steroidal;Cyclooxygenase Inhibitors	No	No
Naphazoline	0.402932	3	Adrenergic alpha-Agonists;Nasal Decongestants	No	No
Methylene Blue	0.405746	41	Anti-Infective Agents, Urinary;Enzyme Inhibitors	Yes	No
Toxiferine	0.407597	1	Neuromuscular Nondepolarizing Agents;Nicotinic Antagonists	No	No
Cefonicid	0.411007	1	Anti-Bacterial Agents	No	No
Proadifen	0.412275	9	Enzyme Inhibitors	No	No
Chlorambucil	0.414832	22	Antineoplastic Agents, Alkylating	No	No
Paraproteins	0.415114	12	Immunologic Factors	No	No
Magnesium Oxide	0.415114	3	Antacids	No	No
Quinine	0.415999	35	Antimalarials;Muscle Relaxants, Central;Analgesics, Non-Narcotic	Yes	No
Poloxamer	0.418238	6	Surface-Active Agents;Excipients	No	No
2,4,5-Trichlorophenoxyacetic Acid	0.419476	4	Herbicides	No	No
Stavudine	0.419913	6	Antimetabolites;Anti-HIV Agents;Reverse Transcriptase Inhibitors	No	No
Gamma-Endorphin	0.421681	1	Neurotransmitter Agents	No	No
1-Octanol	0.422095	2	Solvents	No	No
Mepivacaine	0.4315	12	Anesthetics, Local	No	No
Temazepam	0.43587	4	Hypnotics and Sedatives;GABA Modulators;Anti-Anxiety Agents	No	No
Imipramine	0.440081	63	Antidepressive Agents, Tricyclic;Adrenergic Uptake Inhibitors	Yes	No
Nigericin	0.442408	11	Anti-Bacterial Agents;Ionophores	No	No
Tylosin	0.446588	3	Anti-Bacterial Agents	No	No
Timolol	0.447959	13	Adrenergic beta-Antagonists;Antihypertensive Agents;Anti-Arrhythmia Agents	No	No
Ribostamycin	0.454384	1	Anti-Bacterial Agents	No	No
Nitroxinil	0.456477	1	Antiplatyhelmintic Agents	No	No
Bromazepam	0.459031	2	GABA Modulators;Anti-Anxiety Agents	No	No
Chlordecone	0.459312	2	Insecticides	No	No
Procaterol	0.46151	2	Adrenergic beta-Agonists;Bronchodilator Agents;Sympathomimetics	No	No
Lindane	0.464035	20	Insecticides	Yes	No
Megestrol	0.466777	6	Antineoplastic Agents, Hormonal;Contraceptives, Oral, Synthetic	No	No
Fibrin Tissue Adhesive	0.468088	13	Tissue Adhesives;Hemostatics	No	No
Fenbendazole	0.470803	3	Antinematodal Agents	No	No
Bethanechol	0.472292	12	Parasympathomimetics;Muscarinic Agonists	Yes	No
Mineral Oil	0.472292	12	Emollients	No	No
Cyclofenil	0.472292	1	Fertility Agents, Female	No	No
Ethchlorvynol	0.472292	1	Hypnotics and Sedatives	No	No
Plasma Kallikrein	0.478922	5	Coagulants	No	No
Ancrod	0.483682	2	Anticoagulants;Fibrinolytic Agents	No	No
Phenindione	0.48754	5	Anticoagulants	No	No
Burimamide	0.488353	1	Anti-Ulcer Agents;Histamine H2 Antagonists	No	No
Dihydroergocryptine	0.488353	1	Dopamine Agonists;Vasodilator Agents	No	No
Leukocidins	0.488353	1	Cytotoxins	No	No
Neomycin	0.491326	60	Anti-Bacterial Agents;Protein Synthesis Inhibitors	Yes	No
Ketotifen	0.491587	6	Antipruritics;Anti-Allergic Agents;Histamine H1 Antagonists	No	No
Dihydralazine	0.494751	4	Antihypertensive Agents	No	No
Clonixin	0.495905	2	Anti-Inflammatory Agents, Non-Steroidal	No	No
Dibutyl Phthalate	0.500808	3	Plasticizers	No	No
Alpha-Defensins	0.501777	3	Anti-Infective Agents	No	No
Nadroparin	0.501777	2	Anticoagulants;Fibrinolytic Agents	No	No
Vincamine	0.5027	2	Antihypertensive Agents;Vasodilator Agents	No	No
Moxisylyte	0.5027	1	Miotics;Sympatholytics;Vasodilator Agents;Adrenergic alpha-Antagonists	No	No
Trihexyphenidyl	0.508217	3	Antiparkinson Agents;Muscarinic Antagonists	Yes	No
Octopamine	0.511847	7	Adrenergic alpha-Agonists;Vasoconstrictor Agents	No	No
Cnidarian Venoms	0.511847	4	Poisons	No	No
Ethynodiol Diacetate	0.513008	4	Contraceptives, Oral, Synthetic	No	No
Nefopam	0.517162	1	Analgesics, Non-Narcotic	No	No
Artemisinins	0.51782	6	Antimalarials	No	No
Niclosamide	0.518954	3	Anticestodal Agents;Molluscacides;Antinematodal Agents	No	No
Spiramycin	0.527995	5	Anti-Bacterial Agents;Coccidiostats	No	No
Epirubicin	0.528388	19	Antibiotics, Antineoplastic	No	No
Propolis	0.528388	5	Anti-Infective Agents	No	No
Remoxipride	0.529126	2	Antipsychotic Agents;Dopamine Antagonists	No	No
Mesoridazine	0.529126	1	Antipsychotic Agents;Dopamine Antagonists	No	No
Lactulose	0.530142	9	Gastrointestinal Agents	No	No
Acrylonitrile	0.531244	8	Carcinogens	No	No
Aldicarb	0.53364	2	Insecticides;Cholinesterase Inhibitors	No	No
Chenodeoxycholic Acid	0.535192	17	Gastrointestinal Agents;Cathartics	No	No
5,6-Dihydroxytryptamine	0.541098	3	Serotonin Agents	No	No
Practolol	0.546114	8	Adrenergic beta-Antagonists;Anti-Arrhythmia Agents	No	No
Fenoterol	0.548389	9	Bronchodilator Agents;Tocolytic Agents;Adrenergic beta-Agonists;Sympathomimetics	No	No
Arbaprostil	0.549736	1	Anti-Ulcer Agents	No	No
Butylscopolammonium Bromide	0.551512	1	Parasympatholytics;Muscarinic Antagonists	No	No
Complementarity Determining Regions	0.551824	12	Immunologic Factors	Yes	No
Dextromethorphan	0.558992	9	Analgesics, Opioid;Excitatory Amino Acid Antagonists;Antitussive Agents	Yes	No
Ethinyl Estradiol-Norgestrel Combination	0.562393	2	Contraceptives, Oral, Combined;Contraceptives, Oral, Synthetic;Contraceptives, Postcoital, Synthetic	No	No
Fluphenazine	0.563837	12	Antipsychotic Agents;Dopamine Antagonists	Yes	No
Calcium Dobesilate	0.568155	2	Hemostatics	No	No
Lobeline	0.568628	2	Ganglionic Stimulants;Nicotinic Agonists;Respiratory System Agents	No	No
Veratrum Alkaloids	0.569102	4	Antihypertensive Agents	No	No
Fusidic Acid	0.575081	8	Anti-Bacterial Agents;Protein Synthesis Inhibitors	No	No
Cefsulodin	0.578634	2	Anti-Bacterial Agents	No	No
Carbocysteine	0.580039	1	Anti-Infective Agents, Local;Expectorants	Yes	No
Semustine	0.580039	1	Antineoplastic Agents, Alkylating	No	No
Epoetin Alfa	0.580569	4	Hematinics	No	No
Thiamine Monophosphate	0.583053	1	Vitamin B Complex	Yes	No
Dequalinium	0.583053	1	Anti-Infective Agents, Local	No	No
Dicofol	0.583053	1	Insecticides	No	No
Fenitrothion	0.587977	4	Cholinesterase Inhibitors;Insecticides	No	No
Nitrogen Mustard Compounds	0.591721	21	Antineoplastic Agents, Alkylating	No	No
Terfenadine	0.592393	5	Histamine H1 Antagonists;Anti-Asthmatic Agents;Anti-Allergic Agents	No	No
Doxazosin	0.594619	6	Adrenergic alpha-Antagonists;Antihypertensive Agents;Vasodilator Agents;Anticholesteremic Agents	Yes	No
Medroxyprogesterone	0.596864	27	Contraceptives, Oral, Synthetic	Yes	No
Doxylamine	0.596945	1	Anti-Allergic Agents;Hypnotics and Sedatives;Histamine H1 Antagonists;Antitussive Agents;Antiemetics	No	No
Noscapine	0.596945	1	Antitussive Agents	No	No
O-Chlorobenzylidenemalonitrile	0.597038	1	Riot Control Agents, Chemical	No	No
Roxithromycin	0.602826	5	Anti-Bacterial Agents	No	No
Nordazepam	0.606993	3	GABA Modulators;Anti-Anxiety Agents	No	No
Harringtonines	0.609209	2	Antineoplastic Agents, Phytogenic	No	No
Potassium Citrate	0.609209	2	Diuretics;Expectorants	No	No
Bencyclane	0.609209	1	Calcium Channel Blockers;Vasodilator Agents	No	No
Pivampicillin	0.609209	1	Anti-Bacterial Agents	No	No
Xanthinol Niacinate	0.622047	1	Vasodilator Agents	No	No
Trimethadione	0.62905	2	Anticonvulsants	No	No
Ethoxzolamide	0.633443	2	Carbonic Anhydrase Inhibitors;Diuretics	No	No
Viomycin	0.634617	4	Antibiotics, Antitubercular;Anti-Bacterial Agents	No	No
Hydromorphone	0.634669	4	Analgesics, Opioid;Narcotics	No	No
Aflatoxins	0.643367	37	Poisons	No	No
Brompheniramine	0.643367	2	Histamine H1 Antagonists;Anti-Allergic Agents	No	No
Levorphanol	0.643731	6	Analgesics, Opioid;Narcotics	No	No
Mandelic Acids	0.644411	10	Anti-Infective Agents, Urinary	No	No
Flupenthixol	0.648949	3	Dopamine Antagonists;Antipsychotic Agents	No	No
Cinanserin	0.652028	1	Serotonin Antagonists	No	No
Citrinin	0.661145	2	Anti-Bacterial Agents	No	No
Sulfamerazine	0.661145	1	Anti-Infective Agents	No	No
Dibucaine	0.661919	9	Anesthetics, Local	No	No
Beclomethasone	0.661957	18	Anti-Inflammatory Agents;Anti-Asthmatic Agents;Glucocorticoids	No	No
Penfluridol	0.668209	2	Antipsychotic Agents;Dopamine Antagonists	No	No
Bephenium Compounds	0.668209	1	Antinematodal Agents	No	No
Netilmicin	0.674206	8	Anti-Bacterial Agents	No	No
Tinidazole	0.682297	5	Antitrichomonal Agents	No	No
Carbenoxolone	0.682953	5	Anti-Ulcer Agents	No	No
3,3'-Dichlorobenzidine	0.684473	1	Carcinogens	No	No
Allylglycine	0.684473	1	Convulsants;GABA Antagonists	No	No
6-Mercaptopurine	0.685651	27	Antimetabolites;Nucleic Acid Synthesis Inhibitors;Immunosuppressive Agents;Antimetabolites, Antineoplastic	No	No
Enoxaparin	0.69091	8	Anticoagulants;Fibrinolytic Agents	Yes	No
Tetrachloroethylene	0.699197	8	Carcinogens;Environmental Pollutants;Solvents	No	No
P-Dimethylaminoazobenzene	0.702164	10	Carcinogens;Coloring Agents	No	No
Aminophylline	0.702661	23	Bronchodilator Agents;Phosphodiesterase Inhibitors;Cardiotonic Agents	No	No
Sulfasalazine	0.704224	19	Anti-Inflammatory Agents, Non-Steroidal;Gastrointestinal Agents;Antirheumatic Agents;Anti-Infective Agents	Yes	No
Bentonite	0.710461	7	Antidotes	No	No
Cell Wall Skeleton	0.711058	1	Adjuvants, Immunologic	No	No
Simethicone	0.712009	2	Antifoaming Agents;Emollients	No	No
Levamisole	0.713471	20	Adjuvants, Immunologic;Antinematodal Agents;Antirheumatic Agents	No	No
Gliclazide	0.713471	4	Hypoglycemic Agents	No	No
Dioctyl Sulfosuccinic Acid	0.721423	1	Surface-Active Agents	No	No
Epothilones	0.721423	1	Tubulin Modulators	No	No
Saccharin	0.72297	19	Sweetening Agents	No	No
Flurbiprofen	0.723122	6	Anti-Inflammatory Agents, Non-Steroidal;Carbonic Anhydrase Inhibitors;Cyclooxygenase Inhibitors;Analgesics	Yes	No
Sulfobromophthalein	0.723294	16	Coloring Agents;Indicators and Reagents	No	No
Ethosuximide	0.723342	7	Anticonvulsants	No	No
Methylprednisolone Hemisuccinate	0.723493	3	Anti-Inflammatory Agents;Neuroprotective Agents;Antineoplastic Agents, Hormonal;Glucocorticoids	No	No
Reserpine	0.723686	93	Antipsychotic Agents;Adrenergic Uptake Inhibitors;Antihypertensive Agents	Yes	No
Lamivudine	0.726533	21	Reverse Transcriptase Inhibitors;Anti-HIV Agents	No	No
Econazole	0.726724	3	Antifungal Agents	No	No
Pyrethrins	0.728034	21	Insecticides	No	No
Perazine	0.728617	1	Antipsychotic Agents;Dopamine Antagonists	No	No
Monocrotophos	0.7298	1	Cholinesterase Inhibitors;Insecticides;Mutagens;Monoamine Oxidase Inhibitors	No	No
Methylprednisolone	0.731046	82	Anti-Inflammatory Agents;Glucocorticoids;Antiemetics;Neuroprotective Agents	No	No
Ethacrynic Acid	0.731046	16	Diuretics;Enzyme Inhibitors	No	No
Oxazolone	0.733075	5	Adjuvants, Immunologic	No	No
Trimetazidine	0.733075	3	Vasodilator Agents	No	No
Atrazine	0.735347	6	Herbicides	No	No
Linuron	0.735347	1	Herbicides	No	No
Sizofiran	0.735347	1	Adjuvants, Immunologic;Antineoplastic Agents, Phytogenic	No	No
Tragacanth	0.735347	1	Excipients	No	No
Thiourea	0.739468	28	Indicators and Reagents	Yes	No
Tranylcypromine	0.74031	8	Monoamine Oxidase Inhibitors;Antidepressive Agents;Anti-Anxiety Agents	Yes	No
Dyphylline	0.742798	1	Bronchodilator Agents;Vasodilator Agents;Phosphodiesterase Inhibitors	No	No
Diphenylhexatriene	0.749543	6	Fluorescent Dyes	Yes	No
Dihydromorphine	0.764341	2	Analgesics, Opioid;Narcotics	No	No
Trimethaphan	0.786807	5	Adjuvants, Anesthesia;Ganglionic Blockers;Nicotinic Antagonists;Antihypertensive Agents	No	No
Penbutolol	0.786807	2	Adrenergic beta-Antagonists;Antihypertensive Agents	No	No
Chromomycin A3	0.800944	1	Antibiotics, Antineoplastic;Fluorescent Dyes;Nucleic Acid Synthesis Inhibitors	No	No
Propanil	0.800944	1	Herbicides	No	No
Uracil Mustard	0.800944	1	Antineoplastic Agents, Alkylating	No	No
Charcoal	0.810772	47	Antidotes	No	No
Moclobemide	0.813009	5	Antidepressive Agents;Monoamine Oxidase Inhibitors	Yes	No
Streptovaricin	0.814977	1	Anti-Bacterial Agents;Antiviral Agents;Antibiotics, Antineoplastic	No	No
Pokeweed Mitogens	0.817271	25	Mitogens	Yes	No
Flurandrenolone	0.826294	1	Anti-Inflammatory Agents;Glucocorticoids	No	No
4-Hydroxyaminoquinoline-1-Oxide	0.835575	1	Mutagens;Carcinogens	No	No
Botulinum Antitoxin	0.835575	1	Immunologic Factors	No	No
Hempa	0.835575	1	Chemosterilants	No	No
Carbimazole	0.837628	6	Antithyroid Agents	No	No
Penicillanic Acid	0.8377	7	Anti-Bacterial Agents	No	No
Oligomycins	0.846379	20	Enzyme Inhibitors;Uncoupling Agents;Anti-Bacterial Agents	Yes	No
Motilin	0.847369	10	Gastrointestinal Agents	No	No
Nonoxynol	0.847369	3	Surface-Active Agents;Spermatocidal Agents	No	No
Mitolactol	0.848947	1	Antineoplastic Agents, Alkylating	No	No
Phosmet	0.848947	1	Insecticides	No	No
Amikacin	0.85703	28	Anti-Bacterial Agents	No	No
Sulfaguanidine	0.860792	1	Anti-Infective Agents	No	No
Phenoperidine	0.865259	1	Analgesics, Opioid;Narcotics	No	No
Prothionamide	0.865259	1	Antitubercular Agents	No	No
Technetium Tc 99M Lidofenin	0.881227	1	Radiopharmaceuticals	No	No
Zineb	0.881227	1	Fungicides, Industrial	No	No
Aluminum Hydroxide	0.882493	15	Antacids;Adjuvants, Immunologic	Yes	No
Camphor	0.895377	9	Anti-Infective Agents, Local	No	No
Azithromycin	0.898075	19	Anti-Bacterial Agents	No	No
Taurodeoxycholic Acid	0.898379	2	Cholagogues and Choleretics;Detergents	No	No
Zimeldine	0.898379	2	Serotonin Uptake Inhibitors	No	No
Dideoxynucleosides	0.899026	10	Antimetabolites;Antiviral Agents;Reverse Transcriptase Inhibitors	Yes	No
Hydroxycholecalciferols	0.899026	18	Vitamins;Bone Density Conservation Agents	No	No
Moricizine	0.899026	3	Anti-Arrhythmia Agents	No	No
Mitotane	0.902441	3	Antineoplastic Agents, Hormonal	No	No
Antipyrine	0.908074	23	Anti-Inflammatory Agents, Non-Steroidal	Yes	No
[truncated: 20 more rows]
