# Supplementary material for: Building Disease-Specific Drug-Protein Connectivity Maps from Molecular Interaction Networks and PubMed Abstracts
Source: PLoS Comput Biol. 2009 Jul 31;5(7):e1000450. doi: 10.1371/journal.pcbi.1000450 (PMC2709445; doi:10.1371/journal.pcbi.1000450)
Supplement: Dataset S3 — The file includes one source matrix data of Figure 6 (a connectivity map for Alzheimer's Disease connecting 66 proteins with 166 drugs), and one table containing protein-drug associations shown pairwise with their evidence PMIDs. (0.32 MB XLS) [file pcbi.1000450.s003.xls]

## Sheet: add_3_1
	A4_HUMAN	LRP1_HUMAN	PSN1_HUMAN	PIN1_HUMAN	FHL2_HUMAN	PSN2_HUMAN	S100B_HUMAN	CLUS_HUMAN	NP1L1_HUMAN	NOG1_HUMAN	NCOA6_HUMAN	CDK5_HUMAN	FLNB_HUMAN	CATB_HUMAN	APBA1_HUMAN	CTND2_HUMAN	ARLY_HUMAN	NCKP1_HUMAN	C1TC_HUMAN	ODO2_HUMAN	PRIO_HUMAN	RAGE_HUMAN	CTNB1_HUMAN	MK10_HUMAN	SNCAP_HUMAN	NEU2_HUMAN	DAB1_HUMAN	APBB1_HUMAN	APLP2_HUMAN	APBA2_HUMAN	TAU_HUMAN	FLNA_HUMAN	SYUG_HUMAN	MOK_HUMAN	P53_HUMAN	GLNA_HUMAN	UBQL1_HUMAN	BCLX_HUMAN	BCL2_HUMAN	BLMH_HUMAN	5HT2C_HUMAN	JIP1_HUMAN	S10A1_HUMAN	UB2D2_HUMAN	GFAP_HUMAN	A2MG_HUMAN	APOE_HUMAN	TRPM2_HUMAN	CAH9_HUMAN
kynurenic acid	-5.32301	-4.36945	-4.36945	-5.64545	-1.94591	-4.57471	-4.11087	-5.01728	-4.63473	0	-2.94444	-4.84419	-3.7612	-5.50939	-1.94591	-1.94591	-4.57471	-2.56495	-6.99118	-4.63473	-3.61092	2.55586	-4.00733	-1.94591	-1.94591	2.18485	0	0	-1.94591	0	-4.69135	-4.11087	-6.25958	2.40707	-4.69135	-4.29046	0	-5.23111	-5.26269	-4.79579	0.75546	-4.93447	-3.43399	-1.94591	-4.69135	-4.51086	-4.51086	-1.94591	-5.45959
serotonin	-0.428046	-8.35208	-0.565116	-9.63711	-5.78996	-8.55968	1.08316	-0.525989	1.6512	0	0.900435	-8.83157	-7.73325	-0.327594	-5.78996	-5.78996	-8.55968	-6.48158	-3.19844	-0.833324	1.8169	-0.335681	-7.98446	-5.78996	-5.78996	-0.197555	0	0	1.99701	0	-8.67744	-8.08979	-0.67446	-0.485199	-8.67744	-8.27206	0	-9.22098	-9.25273	0.795597	1.48794	0.250425	-7.39695	-5.78996	1.41174	0.900921	-0.708185	1.99701	-0.0544649
indoleacetic acids	-7.58731	2.25858	1.16025	3.70424	-4.07754	-6.83411	-6.36475	-7.28001	-6.89467	0	-5.16479	-7.10579	-6.00881	-7.77444	-4.07754	-4.07754	-6.83411	-4.76217	-9.25904	-6.89467	-5.85507	-7.49499	-6.25958	-4.07754	-4.07754	-7.86749	0	0	-4.07754	0	-6.95177	-6.36475	0.869523	0.142526	-6.95177	-6.54679	0	-7.49499	-7.52672	-7.05704	-9.99273	-7.19669	-5.67332	-4.07754	-6.95177	-6.76964	-6.76964	-4.07754	-7.72445
harmine	-4.23411	-3.29584	-3.29584	-4.55388	-1.09861	-3.49651	-3.04452	-3.93183	-3.55535	0	-1.94591	4.02577	-2.70805	-4.41884	-1.09861	-1.09861	-3.49651	-1.60944	-5.8944	-3.55535	-2.56495	-4.14313	-2.94444	-1.09861	-1.09861	-4.51086	0	0	-1.09861	0	-3.61092	-3.04452	-5.16479	-4.29046	-3.61092	-3.21888	0	-4.14313	-4.17439	-3.71357	-6.62672	-3.85015	-2.3979	-1.09861	-3.61092	-3.43399	-3.43399	-1.09861	-4.36945
tyrphostins	-6.09357	-5.1358	-5.1358	-6.41673	-2.63906	-5.34233	-4.8752	-5.7869	3.48263	0	-3.68888	-5.61313	-4.52179	-6.2804	-2.63906	-2.63906	-5.34233	-3.29584	-7.76387	-5.40268	-4.36945	1.78555	-4.77068	-2.63906	-2.63906	-6.37332	0	0	-2.63906	0	-5.45959	-4.8752	-7.03174	1.63636	-5.45959	-5.05625	0	1.78555	-6.03309	-5.56452	-0.710432	-5.70378	-4.18965	-2.63906	-5.45959	-5.27811	-5.27811	-2.63906	-6.23048
methotrexate	0.453291	1.41365	-6.37332	-7.65728	-3.82864	1.20633	-6.11147	-7.02643	-6.64118	0	-4.91265	-6.85224	-5.75574	-7.52078	-3.82864	-3.82864	-6.58064	-4.51086	1.42036	-6.64118	2.18485	-7.24137	-6.00635	-3.82864	-3.82864	0.173148	0	0	-3.82864	0	1.0887	-6.11147	-0.485859	-7.3908	-6.69827	2.59188	0	0.545601	2.12298	0.983462	-9.73897	1.53678	-5.42053	-3.82864	-6.69827	1.27077	-6.51619	-3.82864	0.316173
cytochalasin d	1.00138	-5.826	1.96097	0.677905	-3.29584	-6.03309	-5.56452	-6.47851	-6.09357	0	-4.36945	-6.30445	3.27042	0.814361	-3.29584	4.49113	-6.03309	-3.97029	-8.45681	-6.09357	-5.05625	-6.69332	-5.45959	-3.29584	-3.29584	-7.06561	0	0	-3.29584	0	2.3293	2.91539	0.0625204	-6.84268	-6.1506	-5.7462	0	-6.69332	-6.72503	1.53122	-9.19044	-6.39526	-4.8752	-3.29584	-6.1506	-5.96871	-5.96871	-3.29584	-6.92264
rotenone	-6.52356	-5.56452	-5.56452	-6.84694	-3.04452	-5.77144	-5.3033	1.57036	-5.83188	0	-4.11087	-6.04263	-4.94876	-6.71052	-3.04452	-3.04452	-5.77144	-3.71357	-8.19451	1.95508	-4.79579	-6.43133	-5.1985	-3.04452	-3.04452	-6.80351	0	0	-3.04452	0	-5.88888	-5.3033	-7.46221	-6.58064	-5.88888	-5.4848	0	1.35564	-6.46303	1.79301	-8.92811	-6.1334	-4.61512	-3.04452	-5.88888	-5.70711	-5.70711	-3.04452	1.12639
mitomycins	-5.92693	-4.96981	-4.96981	-6.24998	-2.48491	-5.17615	-4.70953	-5.6204	-5.23644	0	4.95355	-5.44674	-4.35671	-6.11368	-2.48491	-2.48491	3.30376	-3.13549	-7.59689	-5.23644	-4.20469	-5.83481	-4.60517	-2.48491	-2.48491	-6.20658	0	0	-2.48491	0	-5.2933	-4.70953	-6.86485	-5.98394	-5.2933	-4.89035	0	-5.83481	-5.86647	2.3888	-8.33038	-5.53733	-4.02535	-2.48491	-5.2933	3.36792	-5.11199	-2.48491	2.41612
amsacrine	-4.91998	3.81668	-3.97029	-5.24175	-1.60944	-4.17439	-3.71357	-4.61512	-4.23411	0	-2.56495	-4.44265	-3.3673	-5.10595	-1.60944	-1.60944	-4.17439	-2.19722	-6.58617	-4.23411	-3.21888	-4.82831	-3.61092	-1.60944	-1.60944	2.58847	0	0	-1.60944	0	-4.29046	-3.71357	-5.85507	-4.97673	3.49651	-3.89182	0	-4.82831	-4.85981	-4.39445	-7.3192	-4.5326	-3.04452	-1.60944	-4.29046	-4.11087	-4.11087	-1.60944	-5.05625
genistein	1.08133	2.04076	-5.7462	-7.02909	-3.21888	1.83372	-5.4848	-6.39859	-6.01372	0	-4.29046	-6.22456	-5.1299	0.894325	-3.21888	-3.21888	-5.95324	-3.89182	-8.37678	2.46619	-4.97673	1.17358	3.50541	-3.21888	-3.21888	-6.98564	0	0	-3.21888	0	-6.07074	-5.4848	0.142526	1.02424	-6.07074	-5.66643	0	1.86652	-6.64509	-6.17587	-1.32344	-6.31536	-4.79579	-3.21888	-6.07074	1.89809	-5.88888	4.56809	-6.84268
hydrochlorothiazide	-4.91998	-3.97029	-3.97029	-5.24175	-1.60944	-4.17439	-3.71357	4.27018	-4.23411	0	-2.56495	-4.44265	-3.3673	-5.10595	-1.60944	-1.60944	-4.17439	-2.19722	-6.58617	-4.23411	-3.21888	-4.82831	-3.61092	-1.60944	-1.60944	-5.1985	0	0	-1.60944	0	-4.29046	-3.71357	-5.85507	-4.97673	-4.29046	-3.89182	0	-4.82831	-4.85981	-4.39445	-7.3192	-4.5326	-3.04452	-1.60944	-4.29046	-4.11087	-4.11087	-1.60944	-5.05625
vincristine	-7.47817	2.8784	1.2693	-7.8018	-3.97029	1.06193	-6.25575	1.30902	-6.78559	0	-5.05625	-6.99668	1.88707	-7.66528	-3.97029	-3.97029	-6.72503	-4.65396	-1.36288	-6.78559	-5.7462	-7.38585	-6.1506	-3.97029	-3.97029	1.63774	0	0	-3.97029	0	-6.84268	1.53122	-0.630406	-7.5353	2.33027	1.34922	0	2.59797	2.1608	-6.94794	-9.88354	2.08538	-5.56452	-3.97029	0.944284	1.12639	-6.66058	-3.97029	0.864608
acyclovir	-4.91998	-3.97029	-3.97029	-5.24175	-1.60944	-4.17439	-3.71357	-4.61512	-4.23411	0	-2.56495	-4.44265	-3.3673	-5.10595	-1.60944	-1.60944	-4.17439	-2.19722	-6.58617	-4.23411	-3.21888	-4.82831	-3.61092	-1.60944	-1.60944	2.58847	0	0	-1.60944	0	-4.29046	-3.71357	1.9319	-4.97673	-4.29046	-3.89182	0	-4.82831	-4.85981	-4.39445	-7.3192	-4.5326	-3.04452	-1.60944	3.49651	-4.11087	-4.11087	-1.60944	-5.05625
fluorescein-5-isothiocyanate	1.21468	-5.61313	-5.61313	-6.89568	-3.09104	1.96688	-5.35186	-6.2653	-5.88053	0	-4.15888	-6.09131	-4.99721	1.72065	-3.09104	-3.09104	1.96688	-3.7612	-8.24328	-5.88053	2.94278	1.30692	-5.24702	-3.09104	-3.09104	-6.85224	0	0	-3.09104	0	-5.93754	-5.35186	0.275989	1.1576	-5.93754	-5.53339	0	-6.48004	1.96816	-6.04263	-8.97689	-6.18208	-4.66344	-3.09104	2.54237	3.12956	-5.75574	-3.09104	1.07766
adenosine	-7.49721	-6.53669	-6.53669	-7.82084	-3.98898	-6.74406	1.5122	-7.18992	-6.80461	0	-5.07517	1.46419	-5.91889	-7.68432	-3.98898	-3.98898	2.42889	-4.67283	-9.16889	-6.80461	-5.76519	1.07502	-6.16961	3.79798	-3.98898	1.10793	0	0	-3.98898	0	-6.86171	2.61054	-0.64945	0.925572	-6.86171	2.71618	0	-7.40489	0.35035	-6.96697	-0.729637	3.16489	-5.5835	-3.98898	-6.86171	-6.6796	1.10737	-3.98898	0.15263
pentoxifylline	-6.01372	-5.05625	-5.05625	-6.33683	-2.56495	-5.26269	-4.79579	2.07986	-5.32301	0	-3.61092	-5.53339	-4.44265	-6.20051	-2.56495	-2.56495	-5.26269	-3.21888	-7.68386	-5.32301	-4.29046	-5.92158	-4.69135	-2.56495	-2.56495	-6.29342	0	0	-2.56495	0	-5.3799	-4.79579	-6.95177	-6.07074	3.10001	-4.97673	0	-5.92158	1.83372	-5.4848	-8.41737	-5.62402	-4.11087	-2.56495	-5.3799	2.58847	-5.1985	-2.56495	2.3293
indocyanine green	-5.32301	-4.36945	-4.36945	-5.64545	-1.94591	-4.57471	-4.11087	2.76969	-4.63473	0	4.84253	-4.84419	-3.7612	-5.50939	-1.94591	-1.94591	-4.57471	-2.56495	-6.99118	-4.63473	-3.61092	-5.23111	-4.00733	-1.94591	-1.94591	-5.60212	0	0	-1.94591	0	-4.69135	-4.11087	-6.25958	-5.3799	-4.69135	3.49651	0	-5.23111	-5.26269	-4.79579	-7.72445	-4.93447	-3.43399	-1.94591	-4.69135	-4.51086	-4.51086	-1.94591	-5.45959
diltiazem	-6.66313	-5.70378	-5.70378	-6.98657	-3.17805	-5.9108	-5.44242	1.43086	-5.97126	0	-4.2485	-6.18208	-5.0876	0.936841	-3.17805	-3.17805	-5.9108	-3.85015	-8.33423	-5.97126	-4.93447	1.21608	-5.33754	-3.17805	-3.17805	1.53678	0	0	-3.17805	0	-6.02828	-5.44242	2.58258	-6.72022	-6.02828	2.16295	0	-6.57088	-6.60259	-6.1334	-9.06785	-6.27288	-4.75359	-3.17805	1.75869	-5.84644	1.94053	-3.17805	0.986797
cromakalim	-4.63473	-3.68888	-3.68888	-4.95583	-1.38629	-3.89182	-3.43399	-4.33073	-3.95124	0	-2.30259	-4.15888	-3.09104	-4.82028	-1.38629	-1.38629	-3.89182	-1.94591	-6.29895	-3.95124	-2.94444	-4.54329	-3.3322	-1.38629	-1.38629	-4.91265	0	0	-1.38629	0	-4.00733	-3.43399	2.21862	-4.69135	-4.00733	-3.61092	0	-4.54329	-4.57471	-4.11087	-7.03174	-4.2485	-2.77259	-1.38629	-4.00733	-3.82864	-3.82864	-1.38629	-4.77068
amoxicillin	-4.91998	-3.97029	-3.97029	-5.24175	-1.60944	-4.17439	-3.71357	-4.61512	-4.23411	0	-2.56495	-4.44265	-3.3673	-5.10595	-1.60944	-1.60944	-4.17439	-2.19722	-6.58617	-4.23411	4.56809	-4.82831	-3.61092	-1.60944	-1.60944	-5.1985	0	0	-1.60944	0	-4.29046	-3.71357	-5.85507	-4.97673	-4.29046	-3.89182	0	-4.82831	-4.85981	-4.39445	-7.3192	-4.5326	-3.04452	-1.60944	-4.29046	-4.11087	-4.11087	-1.60944	-5.05625
thioguanine	-4.63473	-3.68888	-3.68888	-4.95583	-1.38629	-3.89182	-3.43399	-4.33073	-3.95124	0	-2.30259	-4.15888	-3.09104	-4.82028	-1.38629	-1.38629	-3.89182	-1.94591	-6.29895	-3.95124	-2.94444	-4.54329	-3.3322	-1.38629	-1.38629	-4.91265	0	0	-1.38629	0	-4.00733	-3.43399	-5.56834	-4.69135	-4.00733	4.17605	0	-4.54329	-4.57471	3.67609	-7.03174	-4.2485	-2.77259	-1.38629	-4.00733	-3.82864	-3.82864	-1.38629	-4.77068
1-methyl-3-isobutylxanthine	-6.66313	-5.70378	-5.70378	-6.98657	-3.17805	2.56911	-5.44242	2.1238	-5.97126	0	-4.2485	1.60488	-5.0876	-6.85013	-3.17805	-3.17805	-5.9108	3.93682	-8.33423	3.42481	-4.93447	-6.57088	-5.33754	-3.17805	-3.17805	2.22983	0	0	-3.17805	0	-6.02828	-5.44242	-7.6019	-6.72022	-6.02828	2.16295	0	-6.57088	-6.60259	-6.1334	-9.06785	-6.27288	-4.75359	-3.17805	1.75869	-5.84644	1.94053	-3.17805	-6.80017
chloroquine	2.97848	2.7347	-6.1506	-7.43426	-3.61092	-6.35784	-5.88888	2.0818	-6.41836	0	-4.69135	-6.62936	3.35191	2.79141	-3.61092	-3.61092	-6.35784	-4.29046	-8.78217	-6.41836	2.40707	-7.0184	-5.78383	-3.61092	-3.61092	0.396168	0	0	-3.61092	0	2.00447	-5.88888	-0.262779	-7.16781	-6.47543	-6.07074	0	0.768565	-7.05012	1.89927	-9.51584	-6.72022	-5.1985	-3.61092	-6.47543	-6.29342	2.18649	-3.61092	-7.24779
prazosin	-6.74641	-5.7869	-5.7869	-7.06987	-3.2581	-5.99396	-5.52545	2.04056	-6.05444	0	-4.33073	-6.2653	-5.17048	-6.93342	-3.2581	-3.2581	-5.99396	-3.93183	-8.41759	-6.05444	-5.01728	-6.65415	-5.42053	-3.2581	-3.2581	2.55195	0	0	-3.2581	0	-6.11147	-5.52545	0.101723	-6.80351	1.6755	-5.70711	0	-6.65415	-6.68586	1.57036	0.714818	-6.35611	-4.83628	-3.2581	-6.11147	1.85738	-5.92959	-3.2581	-6.88346
calcimycin	2.56329	-6.66058	2.51237	-7.94485	-4.11087	0.918993	-6.39859	0.47308	-6.92854	0	-5.1985	1.74564	2.43727	2.05772	-4.11087	-4.11087	0.918993	-4.79579	-9.29293	0.858429	-5.88888	-7.52887	-6.29342	-4.11087	-4.11087	0.983925	0	0	-4.11087	0	1.89966	1.38837	1.71105	-7.67833	-6.98564	-6.58064	0	0.951037	0.226366	1.389	-10.0266	-7.23056	-5.70711	-4.11087	0.801325	-6.80351	0.983462	-4.11087	0.721573
bendroflumethiazide	-4.63473	-3.68888	-3.68888	-4.95583	-1.38629	-3.89182	-3.43399	3.45623	-3.95124	0	-2.30259	-4.15888	-3.09104	-4.82028	-1.38629	-1.38629	-3.89182	-1.94591	-6.29895	-3.95124	-2.94444	-4.54329	-3.3322	-1.38629	-1.38629	-4.91265	0	0	-1.38629	0	-4.00733	-3.43399	-5.56834	-4.69135	-4.00733	-3.61092	0	-4.54329	-4.57471	-4.11087	-7.03174	-4.2485	-2.77259	-1.38629	-4.00733	-3.82864	-3.82864	-1.38629	-4.77068
theophylline	-6.57228	2.17384	-5.61313	-6.89568	-3.09104	-5.82008	-5.35186	2.62	-5.88053	0	-4.15888	-6.09131	-4.99721	1.02771	-3.09104	-3.09104	2.65982	-3.7612	-8.24328	1.90643	-4.84419	-6.48004	-5.24702	-3.09104	-3.09104	-6.85224	0	0	-3.09104	0	-5.93754	-5.35186	-7.51098	-6.62936	-5.93754	2.94652	0	-6.48004	1.27522	-6.04263	-8.97689	-6.18208	-4.66344	-3.09104	1.84943	-5.75574	-5.75574	-3.09104	-6.7093
indomethacin	1.36941	1.23161	-6.55536	-7.83953	-4.00733	1.02424	-6.29342	1.6767	-6.82329	0	-5.09375	-7.03439	-5.93754	1.46994	-4.00733	-4.00733	-6.76273	-4.69135	-9.18758	1.65662	-5.78383	-7.42357	2.98469	-4.00733	-4.00733	2.47544	0	0	-4.00733	0	-6.88038	-6.29342	0.0248016	-7.57302	0.906583	-6.47543	0	0.363399	-7.4553	1.49426	-1.03598	1.76002	-5.60212	-4.00733	-6.88038	1.0887	1.0887	-4.00733	0.826886
azathioprine	-4.63473	-3.68888	-3.68888	-4.95583	-1.38629	-3.89182	-3.43399	-4.33073	-3.95124	0	-2.30259	-4.15888	-3.09104	-4.82028	-1.38629	-1.38629	-3.89182	-1.94591	-6.29895	-3.95124	-2.94444	-4.54329	-3.3322	-1.38629	-1.38629	-4.91265	0	0	-1.38629	0	-4.00733	4.35298	-5.56834	-4.69135	-4.00733	-3.61092	0	-4.54329	-4.57471	-4.11087	-7.03174	-4.2485	-2.77259	-1.38629	-4.00733	-3.82864	-3.82864	-1.38629	3.01628
dactinomycin	0.21709	1.17808	-7.30182	-8.58653	3.04203	2.22319	-7.03966	-7.95543	1.31537	0	-5.83773	0.00582849	1.79655	0.0299222	-4.74493	-4.74493	2.22319	-5.43372	-9.93474	1.60302	-6.52942	-0.383502	0.85257	-4.74493	-4.74493	-0.756089	0	0	-4.74493	0	0.15991	-7.03966	-1.41524	-0.532994	1.76902	2.35654	0	1.00248	0.277698	0.0545978	-10.6685	-7.87207	-6.34739	3.04203	0.15991	1.44047	0.342134	-4.74493	0.996088
puromycin	1.77325	-5.05625	-5.05625	-6.33683	-2.56495	-5.26269	-4.79579	-5.70711	2.46396	0	-3.61092	-5.53339	-4.44265	1.58646	-2.56495	-2.56495	3.91026	-3.21888	-7.68386	2.46396	-4.29046	-5.92158	-4.69135	-2.56495	-2.56495	-6.29342	0	0	-2.56495	0	-5.3799	2.99118	-6.95177	-6.07074	2.40707	-4.97673	0	-5.92158	-5.95324	-5.4848	-8.41737	-5.62402	-4.11087	-2.56495	-5.3799	2.58847	-5.1985	-2.56495	-6.1506
vitamin e	0.825671	-6.00141	2.47849	-7.28482	-3.46574	1.57838	-5.73979	1.13281	-6.2691	0	-4.54329	-6.48004	2.40247	1.33156	-3.46574	-3.46574	1.57838	-4.14313	-8.63266	2.21081	-5.23111	2.01629	-5.63479	-3.46574	-3.46574	-7.24137	0	0	-3.46574	0	-6.32615	-5.73979	-7.90027	1.8669	-6.32615	-5.92158	0	0.917953	1.57918	2.04858	-9.36632	-6.57088	-5.04986	-3.46574	1.46082	1.64278	1.64278	-3.46574	1.78693
apomorphine	-6.99302	-6.03309	-6.03309	-7.31655	-3.49651	-6.24028	-5.77144	-6.68586	-6.30079	0	-4.57471	-6.51175	2.37087	-7.18007	-3.49651	-3.49651	-6.24028	-4.17439	-8.66441	2.17912	-5.26269	0.886236	-5.66643	-3.49651	-3.49651	0.513874	0	0	-3.49651	0	-6.35784	-5.77144	-0.145036	0.736844	-6.35784	-5.95324	0	-6.90073	-6.93245	2.01688	-0.512761	-6.60259	-5.0814	-3.49651	-6.35784	-6.17587	4.09563	-3.49651	-7.1301
pirenzepine	-5.92693	-4.96981	-4.96981	-6.24998	-2.48491	-5.17615	-4.70953	-5.6204	-5.23644	0	-3.52636	-5.44674	-4.35671	-6.11368	-2.48491	-2.48491	-5.17615	-3.13549	-7.59689	-5.23644	-4.20469	-5.83481	-4.60517	-2.48491	-2.48491	-6.20658	0	0	-2.48491	0	-5.2933	-4.70953	-6.86485	-5.98394	-5.2933	-4.89035	0	-5.83481	-5.86647	2.3888	1.53566	-5.53733	-4.02535	-2.48491	-5.2933	-5.11199	-5.11199	-2.48491	-6.06379
acridine orange	-4.91998	-3.97029	-3.97029	-5.24175	-1.60944	-4.17439	-3.71357	-4.61512	-4.23411	0	-2.56495	-4.44265	-3.3673	-5.10595	-1.60944	-1.60944	-4.17439	-2.19722	-6.58617	-4.23411	-3.21888	-4.82831	-3.61092	-1.60944	-1.60944	-5.1985	0	0	-1.60944	0	-4.29046	-3.71357	-5.85507	-4.97673	-4.29046	-3.89182	0	2.95865	-4.85981	-4.39445	-7.3192	-4.5326	-3.04452	-1.60944	-4.29046	-4.11087	3.67609	-1.60944	-5.05625
folic acid	-8.25401	-7.29302	-7.29302	-8.57772	-4.7362	-7.50053	-7.03086	-7.94662	-7.56112	0	1.95802	-7.77233	-6.67456	-8.44118	-4.7362	-4.7362	-7.50053	-5.42495	2.48559	-7.56112	-6.52062	-0.374693	-6.9256	-4.7362	-4.7362	-8.53425	0	0	-4.7362	0	-7.61825	-7.03086	-9.1934	-0.524186	-7.61825	-7.21303	0	-0.374693	-0.406433	0.0634045	-10.6597	-7.86327	-6.33859	-4.7362	-7.61825	-7.43603	-7.43603	-4.7362	-0.604209
chlorpromazine	-6.30079	2.44463	-5.34233	-6.62407	-2.83321	-5.54908	3.3985	-5.99396	-5.60947	0	-3.89182	-5.82008	3.05958	-6.48768	-2.83321	-2.83321	-5.54908	-3.49651	-7.97143	-5.60947	3.21226	3.18748	-4.97673	-2.83321	-2.83321	1.20633	0	0	-2.83321	0	-5.66643	-5.0814	-7.23921	3.03823	-5.66643	2.52428	0	-6.20859	-6.24028	-5.77144	0.180303	-5.9108	3.39252	-2.83321	-5.66643	-5.4848	-5.4848	-2.83321	-6.43775
staurosporine	1.4749	0.826619	2.61803	-8.24486	-4.40672	2.00514	-6.69827	0.173148	1.25152	0	-5.49717	2.13882	-6.34212	1.47006	-4.40672	-4.40672	-7.16781	-5.09375	-9.59301	0.558579	-6.18826	-7.82883	1.88686	3.38025	3.38025	0.278521	0	0	-4.40672	0	2.11057	1.78164	-8.8605	-7.97831	0.50146	0.906583	0	2.5968	2.41092	-7.3908	-2.53976	-7.53048	-6.00635	-4.40672	0.50146	-7.10332	-7.10332	-4.40672	-0.27136
trifluoperazine	-6.16752	2.57748	-5.20949	-6.49072	-2.70805	-5.4161	4.44731	-5.86079	-5.47646	0	-3.7612	-5.68698	-4.59512	-6.35437	-2.70805	-2.70805	-5.4161	-3.3673	-7.83795	-5.47646	-4.44265	2.40456	-4.84419	-2.70805	-2.70805	1.33966	0	0	-2.70805	0	-5.53339	-4.94876	0.681181	2.25535	-5.53339	-5.1299	0	-6.07535	-6.10702	2.14861	-8.57149	-5.77765	4.91027	-2.70805	-5.53339	2.43511	-5.35186	-2.70805	-6.30445
hymecromone	-4.91998	3.81668	-3.97029	-5.24175	-1.60944	-4.17439	-3.71357	-4.61512	-4.23411	0	-2.56495	-4.44265	-3.3673	-5.10595	-1.60944	-1.60944	-4.17439	-2.19722	-6.58617	-4.23411	-3.21888	-4.82831	-3.61092	-1.60944	-1.60944	-5.1985	0	0	-1.60944	0	-4.29046	-3.71357	-5.85507	-4.97673	-4.29046	-3.89182	0	-4.82831	-4.85981	-4.39445	-7.3192	-4.5326	-3.04452	-1.60944	-4.29046	-4.11087	3.67609	-1.60944	-5.05625
azure stains	-5.32301	-4.36945	-4.36945	-5.64545	-1.94591	-4.57471	-4.11087	-5.01728	-4.63473	0	-2.94444	-4.84419	-3.7612	-5.50939	-1.94591	-1.94591	-4.57471	-2.56495	-6.99118	-4.63473	-3.61092	-5.23111	-4.00733	-1.94591	-1.94591	-5.60212	0	0	-1.94591	0	3.09562	-4.11087	-6.25958	2.40707	-4.69135	-4.29046	0	-5.23111	-5.26269	-4.79579	-7.72445	-4.93447	-3.43399	-1.94591	-4.69135	-4.51086	-4.51086	-1.94591	3.02032
fluorescein	1.6934	-5.1358	-5.1358	-6.41673	-2.63906	-5.34233	2.91177	2.00007	-5.40268	0	-3.68888	-5.61313	3.26518	2.19951	-2.63906	-2.63906	-5.34233	-3.29584	-7.76387	3.07723	3.41752	-6.00141	-4.77068	-2.63906	-2.63906	-6.37332	0	0	-2.63906	0	-5.45959	-4.8752	-7.03174	-6.1506	-5.45959	-5.05625	0	-6.00141	-6.03309	-5.56452	-8.4974	-5.70378	-4.18965	-2.63906	2.32738	-5.27811	-5.27811	-2.63906	-6.23048
yohimbine	-6.30079	-5.34233	-5.34233	-6.62407	-2.83321	-5.54908	-5.0814	-5.99396	-5.60947	0	-3.89182	-5.82008	-4.72739	-6.48768	-2.83321	-2.83321	2.23789	-3.49651	-7.97143	-5.60947	-4.57471	-6.20859	-4.97673	-2.83321	-2.83321	1.89927	0	0	-2.83321	0	-5.66643	-5.0814	-7.23921	-6.35784	-5.66643	2.52428	0	-6.20859	-6.24028	-5.77144	0.180303	-5.9108	-4.39445	-2.83321	-5.66643	3.91128	-5.4848	-2.83321	-6.43775
quinpirole	-5.60947	-4.65396	-4.65396	-5.93225	-2.19722	-4.85981	-4.39445	-5.3033	-4.91998	0	-3.21888	-5.1299	-4.04305	-5.79606	-2.19722	-2.19722	-4.85981	-2.83321	-7.27863	-4.91998	-3.89182	-5.51745	-4.29046	-2.19722	-2.19722	1.89809	0	0	-2.19722	0	-4.97673	-4.39445	-6.54679	-5.66643	-4.97673	-4.57471	0	-5.51745	-5.54908	-5.0814	0.467888	-5.22036	-3.71357	-2.19722	-4.97673	-4.79579	-4.79579	-2.19722	-5.7462
diazepam	-7.1107	-6.1506	-6.1506	-7.43426	-3.61092	-6.35784	-5.88888	-6.80351	-6.41836	0	-4.69135	-6.62936	2.94652	-7.29777	-3.61092	-3.61092	-6.35784	-4.29046	-8.78217	-6.41836	-5.3799	3.25309	-5.78383	-3.61092	-3.61092	-7.3908	0	0	-3.61092	0	-6.47543	2.59103	0.835556	3.10368	-6.47543	-6.07074	0	-7.0184	-7.05012	-6.58064	0.216683	-6.72022	-5.1985	-3.61092	-6.47543	-6.29342	-6.29342	-3.61092	0.539174
saxitoxin	-5.14166	-4.18965	-4.18965	-5.46383	-1.79176	-4.39445	-3.93183	-4.83628	-4.45435	0	-2.77259	-4.66344	-3.58352	-5.32788	-1.79176	-1.79176	-4.39445	-2.3979	-6.80904	-4.45435	-3.43399	-5.04986	-3.82864	-1.79176	-1.79176	-5.42053	0	0	-1.79176	0	-4.51086	-3.93183	-6.07764	-5.1985	-4.51086	-4.11087	0	-5.04986	-5.0814	-4.61512	-7.54221	-4.75359	-3.2581	-1.79176	-4.51086	-4.33073	-4.33073	-1.79176	-5.27811
desipramine	-5.47646	-4.52179	-4.52179	-5.79909	-2.07944	-4.72739	-4.26268	-5.17048	-4.78749	0	-3.09104	-4.99721	-3.91202	-5.66296	-2.07944	-2.07944	-4.72739	-2.70805	-7.1452	-4.78749	-3.7612	-5.3845	-4.15888	-2.07944	-2.07944	-5.75574	0	0	-2.07944	0	-4.84419	-4.26268	-6.41346	-5.53339	-4.84419	-4.44265	0	-5.3845	-5.4161	-4.94876	1.29442	-5.0876	-3.58352	-2.07944	-4.84419	3.12353	-4.66344	-2.07944	-5.61313
fluoresceins	0.825671	2.47849	1.78555	-7.28482	-3.46574	-6.20859	2.04717	1.82575	-6.2691	0	-4.54329	-6.48004	-5.3845	0.638621	-3.46574	-3.46574	2.67671	-4.14313	-0.845695	2.61621	2.55586	-6.86901	-5.63479	-3.46574	-3.46574	-7.24137	0	0	-3.46574	0	-6.32615	-5.73979	-7.90027	-7.0184	-6.32615	1.86539	0	-6.86901	0.886236	1.35564	-9.36632	-6.57088	2.73711	4.32123	2.55915	1.64278	1.64278	-3.46574	1.38153
ficusin	-4.23411	-3.29584	-3.29584	-4.55388	-1.09861	-3.49651	-3.04452	-3.93183	-3.55535	0	-1.94591	-3.7612	-2.70805	-4.41884	-1.09861	-1.09861	-3.49651	-1.60944	-5.8944	-3.55535	-2.56495	-4.14313	-2.94444	-1.09861	-1.09861	-4.51086	0	0	-1.09861	0	-3.61092	-3.04452	2.62218	-4.29046	-3.61092	-3.21888	0	-4.14313	-4.17439	-3.71357	-6.62672	-3.85015	-2.3979	-1.09861	-3.61092	-3.43399	-3.43399	-1.09861	-4.36945
clomipramine	-6.3613	-5.40268	-5.40268	-6.68461	-2.89037	-5.60947	-5.14166	4.13005	-5.66988	0	-3.95124	-5.88053	-4.78749	-6.54822	-2.89037	-2.89037	-5.60947	-3.55535	-8.03204	-5.66988	-4.63473	-6.2691	-5.03695	-2.89037	-2.89037	-6.64118	0	0	-2.89037	0	-5.72685	-5.14166	-7.2998	-6.41836	-5.72685	-5.32301	0	1.51787	-6.30079	-5.83188	0.407335	-5.97126	-4.45435	-2.89037	-5.72685	-5.54518	-5.54518	-2.89037	-6.49828
caffeine	-7.87055	-6.90975	1.57015	-8.19423	-4.35671	-7.11721	1.13928	-7.5632	-7.17778	0	-5.44674	0.398021	-6.29157	-0.270727	-4.35671	-4.35671	0.669761	3.43648	-9.54237	-7.17778	1.64924	0.00875553	-6.54247	-4.35671	-4.35671	-8.15076	0	0	-4.35671	0	0.552069	-6.64769	2.80534	-0.140718	1.24501	-6.82979	0	-7.77821	0.66996	1.13972	-2.48912	-7.47986	2.52407	-4.35671	-7.2349	-7.05272	-7.05272	-4.35671	-8.0077
chlordiazepoxide	-5.60947	-4.65396	-4.65396	-5.93225	-2.19722	-4.85981	-4.39445	-5.3033	-4.91998	0	-3.21888	-5.1299	-4.04305	-5.79606	-2.19722	-2.19722	-4.85981	-2.83321	-7.27863	-4.91998	-3.89182	3.6555	-4.29046	-2.19722	-2.19722	-5.88888	0	0	-2.19722	0	-4.97673	-4.39445	-6.54679	3.50652	-4.97673	-4.57471	0	-5.51745	-5.54908	-5.0814	0.873284	-5.22036	-3.71357	-2.19722	-4.97673	-4.79579	-4.79579	-2.19722	-5.7462
mianserin	-6.9613	-6.00141	-6.00141	-7.28482	-3.46574	-6.20859	-5.73979	-6.65415	-6.2691	0	-4.54329	-6.48004	-5.3845	-7.14835	-3.46574	-3.46574	-6.20859	-4.14313	-8.63266	-6.2691	-5.23111	-6.86901	-5.63479	-3.46574	-3.46574	-7.24137	0	0	-3.46574	0	-6.32615	-5.73979	-7.90027	-7.0184	-6.32615	-5.92158	0	-6.86901	-6.90073	-6.43133	1.82145	-6.57088	-5.04986	-3.46574	-6.32615	-6.14419	-6.14419	-3.46574	-7.09838
indapamide	-4.23411	-3.29584	-3.29584	-4.55388	-1.09861	-3.49651	-3.04452	-3.93183	-3.55535	0	-1.94591	-3.7612	-2.70805	-4.41884	-1.09861	-1.09861	-3.49651	-1.60944	-5.8944	-3.55535	-2.56495	-4.14313	-2.94444	-1.09861	-1.09861	-4.51086	0	0	-1.09861	0	-3.61092	-3.04452	2.62218	-4.29046	-3.61092	-3.21888	0	-4.14313	-4.17439	-3.71357	-6.62672	-3.85015	-2.3979	-1.09861	-3.61092	-3.43399	-3.43399	-1.09861	-4.36945
flumazenil	-4.91998	-3.97029	-3.97029	-5.24175	-1.60944	-4.17439	-3.71357	-4.61512	-4.23411	0	-2.56495	-4.44265	-3.3673	-5.10595	-1.60944	-1.60944	-4.17439	-2.19722	-6.58617	-4.23411	-3.21888	-4.82831	-3.61092	-1.60944	-1.60944	-5.1985	0	0	-1.60944	0	-4.29046	-3.71357	2.62483	-4.97673	-4.29046	-3.89182	0	-4.82831	-4.85981	-4.39445	0.467765	-4.5326	-3.04452	-1.60944	-4.29046	-4.11087	-4.11087	-1.60944	-5.05625
vinca alkaloids	-4.63473	-3.68888	-3.68888	-4.95583	-1.38629	-3.89182	-3.43399	-4.33073	-3.95124	0	-2.30259	-4.15888	-3.09104	-4.82028	-1.38629	-1.38629	-3.89182	-1.94591	-6.29895	-3.95124	-2.94444	-4.54329	-3.3322	-1.38629	-1.38629	3.56725	0	0	-1.38629	0	-4.00733	-3.43399	-5.56834	-4.69135	-4.00733	-3.61092	0	-4.54329	-4.57471	-4.11087	-7.03174	-4.2485	-2.77259	-1.38629	-4.00733	-3.82864	-3.82864	-1.38629	-4.77068
tetrahydrofolates	-7.87055	-6.90975	0.877214	-8.19423	-4.35671	-7.11721	-6.64769	-7.5632	-7.17778	0	-5.44674	-7.38895	-6.29157	-8.05769	-4.35671	-4.35671	-7.11721	-5.04343	2.53464	-7.17778	-6.13773	-7.77821	-6.54247	-4.35671	-4.35671	-8.15076	0	0	-4.35671	0	-7.2349	-6.64769	-8.80986	-7.92769	-7.2349	-6.82979	0	-7.77821	-7.80995	1.13972	-10.2761	-7.47986	-5.95584	-4.35671	-7.2349	-7.05272	-7.05272	-4.35671	-8.0077
citalopram	1.2634	-5.56452	-5.56452	-6.84694	-3.04452	-5.77144	2.48366	-6.21661	-5.83188	0	-4.11087	-6.04263	-4.94876	1.07644	-3.04452	-3.04452	-5.77144	-3.71357	-8.19451	-5.83188	-4.79579	-6.43133	-5.1985	-3.04452	-3.04452	-6.80351	0	0	-3.04452	0	-5.88888	-5.3033	-7.46221	-6.58064	-5.88888	-5.4848	0	1.35564	-6.46303	-5.99396	1.56652	-6.1334	-4.61512	-3.04452	-5.88888	-5.70711	-5.70711	-3.04452	-6.66058
vinblastine	-6.9613	2.47849	-6.00141	-7.28482	-3.46574	-6.20859	-5.73979	-6.65415	1.51787	0	3.93661	-6.48004	-5.3845	-7.14835	-3.46574	-3.46574	-6.20859	-4.14313	-8.63266	-6.2691	-5.23111	-6.86901	-5.63479	-3.46574	4.32123	0.545601	0	0	-3.46574	0	1.46082	2.04717	-7.90027	-7.0184	1.46082	1.86539	0	1.61089	1.98457	-6.43133	-9.36632	1.90902	-5.04986	-3.46574	-6.32615	-6.14419	-6.14419	-3.46574	2.48
amoxicillin-potassium clavulanate combination	-4.23411	-3.29584	-3.29584	-4.55388	-1.09861	-3.49651	-3.04452	-3.93183	-3.55535	0	-1.94591	-3.7612	-2.70805	-4.41884	-1.09861	-1.09861	-3.49651	-1.60944	-5.8944	-3.55535	-2.56495	-4.14313	-2.94444	-1.09861	-1.09861	-4.51086	0	0	-1.09861	0	-3.61092	-3.04452	-5.16479	-4.29046	-3.61092	-3.21888	0	-4.14313	-4.17439	-3.71357	-6.62672	-3.85015	-2.3979	-1.09861	-3.61092	-3.43399	-3.43399	-1.09861	-4.36945
bicuculline	-6.41836	-5.45959	3.42572	-6.7417	-2.94444	3.72965	-5.1985	-6.11147	-5.72685	0	-4.00733	1.84943	-4.84419	-6.6053	-2.94444	-2.94444	-5.66643	-3.61092	-8.08918	-5.72685	-4.69135	2.15376	-5.09375	-2.94444	-2.94444	1.78164	0	0	4.84253	0	-5.78383	-5.1985	1.12299	2.00447	-5.78383	-5.3799	0	-6.32615	-6.35784	-5.88888	-1.0358	-6.02828	-4.51086	-2.94444	-5.78383	-5.60212	-5.60212	-2.94444	-6.55536
carbamazepine	-6.09357	-5.1358	2.65117	-6.41673	-2.63906	-5.34233	-4.8752	-5.7869	-5.40268	0	-3.68888	-5.61313	-4.52179	-6.2804	-2.63906	-2.63906	-5.34233	-3.29584	-7.76387	-5.40268	-4.36945	3.98241	-4.77068	-2.63906	-2.63906	1.41365	0	0	-2.63906	0	-5.45959	2.91177	-7.03174	3.83322	-5.45959	-5.05625	0	-6.00141	-6.03309	-5.56452	-8.4974	-5.70378	-4.18965	-2.63906	-5.45959	-5.27811	-5.27811	-2.63906	-6.23048
clonazepam	-5.60947	-4.65396	3.13301	-5.93225	-2.19722	-4.85981	-4.39445	-5.3033	-4.91998	0	-3.21888	-5.1299	-4.04305	-5.79606	-2.19722	-2.19722	-4.85981	-2.83321	-7.27863	-4.91998	-3.89182	-5.51745	-4.29046	-2.19722	-2.19722	-5.88888	0	0	-2.19722	0	-4.97673	3.39252	-6.54679	-5.66643	-4.97673	-4.57471	0	-5.51745	-5.54908	2.70556	-0.225051	-5.22036	-3.71357	-2.19722	-4.97673	-4.79579	-4.79579	-2.19722	2.04076
strychnine	-4.63473	-3.68888	-3.68888	-4.95583	-1.38629	-3.89182	-3.43399	-4.33073	-3.95124	0	-2.30259	-4.15888	-3.09104	-4.82028	-1.38629	-1.38629	-3.89182	-1.94591	-6.29895	-3.95124	-2.94444	-4.54329	-3.3322	-1.38629	-1.38629	-4.91265	0	0	-1.38629	0	-4.00733	-3.43399	2.21862	-4.69135	-4.00733	-3.61092	0	-4.54329	-4.57471	-4.11087	-7.03174	-4.2485	-2.77259	-1.38629	-4.00733	-3.82864	-3.82864	-1.38629	3.01628
penicillin g	-5.14166	-4.18965	-4.18965	-5.46383	-1.79176	-4.39445	-3.93183	-4.83628	-4.45435	0	-2.77259	-4.66344	-3.58352	-5.32788	-1.79176	-1.79176	-4.39445	-2.3979	-6.80904	-4.45435	-3.43399	-5.04986	-3.82864	-1.79176	-1.79176	-5.42053	0	0	-1.79176	0	-4.51086	-3.93183	-6.07764	-5.1985	-4.51086	-4.11087	0	-5.04986	-5.0814	3.17185	-7.54221	-4.75359	-3.2581	-1.79176	-4.51086	-4.33073	-4.33073	-1.79176	-5.27811
flunitrazepam	-5.83188	-4.8752	2.91177	-6.15486	-2.3979	-5.0814	-4.61512	-5.52545	-5.14166	0	-3.43399	-5.35186	-4.26268	-6.01859	-2.3979	-2.3979	-5.0814	-3.04452	-7.50163	-5.14166	-4.11087	-5.73979	-4.51086	-2.3979	-2.3979	-6.11147	0	0	-2.3979	0	-5.1985	4.78095	1.01733	-5.88888	-5.1985	-4.79579	0	-5.73979	-5.77144	-5.3033	-8.2351	-5.44242	-3.93183	-2.3979	-5.1985	-5.01728	-5.01728	-2.3979	-5.96871
melatonin	0.892297	-5.93489	-5.93489	-7.21818	-3.4012	-6.14204	2.80658	-6.58755	-6.20254	0	-4.47734	-6.41346	-5.31812	1.3982	-3.4012	-3.4012	-6.14204	3.70943	-8.56598	2.27737	-5.16479	-6.80239	-5.56834	-3.4012	-3.4012	0.612243	0	0	-3.4012	0	2.22033	-5.67332	0.646306	-6.95177	-6.25958	-5.85507	0	-6.80239	-6.83411	1.42222	0.884852	-6.50429	-4.98361	-3.4012	2.22033	1.70932	-6.07764	-3.4012	-7.03174
tubocurarine	-4.63473	-3.68888	-3.68888	-4.95583	-1.38629	-3.89182	-3.43399	-4.33073	-3.95124	0	-2.30259	-4.15888	-3.09104	-4.82028	-1.38629	-1.38629	-3.89182	-1.94591	-6.29895	-3.95124	-2.94444	-4.54329	-3.3322	-1.38629	-1.38629	-4.91265	0	0	-1.38629	0	-4.00733	-3.43399	-5.56834	-4.69135	-4.00733	-3.61092	0	-4.54329	-4.57471	-4.11087	-7.03174	-4.2485	-2.77259	-1.38629	-4.00733	-3.82864	-3.82864	-1.38629	-4.77068
quipazine	-6.09357	-5.1358	-5.1358	-6.41673	-2.63906	-5.34233	-4.8752	-5.7869	-5.40268	0	-3.68888	-5.61313	-4.52179	-6.2804	-2.63906	-2.63906	-5.34233	-3.29584	-7.76387	-5.40268	-4.36945	-6.00141	-4.77068	-2.63906	-2.63906	-6.37332	0	0	-2.63906	0	-5.45959	-4.8752	-7.03174	-6.1506	-5.45959	-5.05625	0	-6.00141	-6.03309	-5.56452	1.77409	-5.70378	-4.18965	-2.63906	-5.45959	-5.27811	-5.27811	-2.63906	-6.23048
tetrodotoxin	0.892297	-5.93489	-5.93489	-7.21818	-3.4012	-6.14204	-5.67332	-6.58755	-6.20254	0	-4.47734	1.37351	-5.31812	0.705258	-3.4012	-3.4012	-6.14204	-4.07754	-8.56598	-6.20254	-5.16479	-6.80239	2.21862	4.38577	-3.4012	1.30518	0	0	-3.4012	0	1.52739	-5.67332	-7.8336	-6.95177	-6.25958	-5.85507	0	-6.80239	-6.83411	2.11516	0.0964403	-6.50429	-4.98361	-3.4012	2.91337	-6.07764	-6.07764	-3.4012	1.44817
omeprazole	-5.72685	-4.77068	-4.77068	-6.04973	-2.30259	2.81023	-4.51086	-5.42053	-5.03695	0	-3.3322	-5.24702	3.62808	-5.9135	-2.30259	-2.30259	-4.97673	-2.94444	-7.39634	-5.03695	-4.00733	-5.63479	-4.40672	-2.30259	-2.30259	-6.00635	0	0	-2.30259	0	-5.09375	-4.51086	-6.66441	-5.78383	-5.09375	3.09562	0	-5.63479	-5.66643	-5.1985	-8.12976	-5.33754	-3.82864	-2.30259	-5.09375	-4.91265	-4.91265	-2.30259	-5.86363
norfloxacin	-4.63473	-3.68888	-3.68888	-4.95583	-1.38629	-3.89182	-3.43399	-4.33073	-3.95124	0	-2.30259	-4.15888	-3.09104	-4.82028	-1.38629	-1.38629	-3.89182	-1.94591	-6.29895	-3.95124	-2.94444	-4.54329	-3.3322	-1.38629	-1.38629	-4.91265	0	0	-1.38629	0	-4.00733	-3.43399	-5.56834	-4.69135	-4.00733	-3.61092	0	-4.54329	-4.57471	-4.11087	-7.03174	-4.2485	-2.77259	-1.38629	-4.00733	-3.82864	-3.82864	-1.38629	-4.77068
flurazepam	-4.23411	-3.29584	-3.29584	-4.55388	-1.09861	-3.49651	-3.04452	-3.93183	-3.55535	0	-1.94591	-3.7612	-2.70805	-4.41884	-1.09861	-1.09861	-3.49651	-1.60944	-5.8944	-3.55535	-2.56495	-4.14313	-2.94444	-1.09861	-1.09861	-4.51086	0	0	-1.09861	0	-3.61092	-3.04452	-5.16479	-4.29046	-3.61092	-3.21888	0	-4.14313	-4.17439	-3.71357	-6.62672	-3.85015	-2.3979	-1.09861	-3.61092	-3.43399	-3.43399	-1.09861	-4.36945
ciprofloxacin	-5.14166	-4.18965	-4.18965	-5.46383	-1.79176	-4.39445	-3.93183	-4.83628	-4.45435	0	-2.77259	-4.66344	-3.58352	2.45909	-1.79176	-1.79176	-4.39445	-2.3979	-6.80904	-4.45435	4.35298	-5.04986	-3.82864	-1.79176	-1.79176	-5.42053	0	0	-1.79176	0	-4.51086	-3.93183	-6.07764	-5.1985	-4.51086	-4.11087	0	-5.04986	-5.0814	-4.61512	-7.54221	-4.75359	-3.2581	-1.79176	-4.51086	-4.33073	-4.33073	-1.79176	-5.27811
didanosine	-4.23411	-3.29584	-3.29584	-4.55388	-1.09861	-3.49651	-3.04452	-3.93183	-3.55535	0	-1.94591	-3.7612	-2.70805	-4.41884	-1.09861	-1.09861	-3.49651	-1.60944	-5.8944	-3.55535	-2.56495	-4.14313	-2.94444	-1.09861	-1.09861	-4.51086	0	0	-1.09861	0	-3.61092	-3.04452	-5.16479	-4.29046	-3.61092	-3.21888	0	-4.14313	-4.17439	-3.71357	-6.62672	-3.85015	-2.3979	-1.09861	-3.61092	-3.43399	-3.43399	-1.09861	-4.36945
piperacillin	-4.23411	-3.29584	-3.29584	-4.55388	-1.09861	-3.49651	-3.04452	3.85514	-3.55535	0	-1.94591	-3.7612	-2.70805	-4.41884	-1.09861	-1.09861	-3.49651	-1.60944	-5.8944	-3.55535	-2.56495	-4.14313	-2.94444	-1.09861	-1.09861	-4.51086	0	0	-1.09861	0	-3.61092	-3.04452	-5.16479	-4.29046	-3.61092	-3.21888	0	-4.14313	-4.17439	-3.71357	-6.62672	-3.85015	-2.3979	-1.09861	-3.61092	-3.43399	-3.43399	-1.09861	-4.36945
thioinosine	-4.91998	-3.97029	-3.97029	-5.24175	-1.60944	-4.17439	-3.71357	-4.61512	-4.23411	0	-2.56495	-4.44265	-3.3673	-5.10595	-1.60944	-1.60944	-4.17439	-2.19722	-6.58617	-4.23411	-3.21888	-4.82831	-3.61092	-1.60944	-1.60944	2.58847	0	0	-1.60944	0	-4.29046	-3.71357	-5.85507	-4.97673	-4.29046	-3.89182	0	-4.82831	-4.85981	-4.39445	-7.3192	-4.5326	-3.04452	-1.60944	-4.29046	-4.11087	-4.11087	-1.60944	-5.05625
mitomycin	-7.16472	-6.20456	-6.20456	-7.48829	-3.66356	2.06809	-5.9428	-6.85751	-6.47235	0	-4.74493	-6.68336	-5.58725	-7.3518	-3.66356	-3.66356	1.37515	-4.34381	-8.83623	-6.47235	-5.43372	-7.07242	-5.83773	-3.66356	-3.66356	-7.44483	0	0	-3.66356	0	-6.52942	-5.9428	-8.1038	-7.22184	2.64353	-6.12468	0	0.714545	0.682823	-6.63463	-9.5699	1.70568	-5.25227	-3.66356	-6.52942	2.13252	-6.34739	-3.66356	3.19281
ampicillin	-4.91998	-3.97029	-3.97029	-5.24175	-1.60944	-4.17439	-3.71357	-4.61512	-4.23411	0	-2.56495	-4.44265	-3.3673	-5.10595	-1.60944	-1.60944	-4.17439	-2.19722	-6.58617	-4.23411	-3.21888	-4.82831	-3.61092	-1.60944	-1.60944	-5.1985	0	0	-1.60944	0	-4.29046	-3.71357	-5.85507	-4.97673	-4.29046	-3.89182	0	-4.82831	-4.85981	3.39252	-7.3192	-4.5326	-3.04452	-1.60944	-4.29046	-4.11087	-4.11087	-1.60944	-5.05625
ticarcillin	-4.23411	-3.29584	-3.29584	-4.55388	-1.09861	-3.49651	-3.04452	-3.93183	-3.55535	0	-1.94591	-3.7612	-2.70805	-4.41884	6.68835	-1.09861	-3.49651	-1.60944	-5.8944	-3.55535	-2.56495	-4.14313	-2.94444	-1.09861	-1.09861	-4.51086	0	0	-1.09861	0	-3.61092	-3.04452	-5.16479	-4.29046	-3.61092	-3.21888	0	-4.14313	-4.17439	-3.71357	-6.62672	-3.85015	-2.3979	-1.09861	-3.61092	-3.43399	-3.43399	-1.09861	-4.36945
nedocromil	-4.23411	-3.29584	-3.29584	-4.55388	-1.09861	-3.49651	-3.04452	-3.93183	-3.55535	0	-1.94591	-3.7612	-2.70805	-4.41884	-1.09861	-1.09861	4.29046	-1.60944	-5.8944	-3.55535	-2.56495	-4.14313	-2.94444	-1.09861	-1.09861	-4.51086	0	0	-1.09861	0	-3.61092	-3.04452	-5.16479	-4.29046	-3.61092	-3.21888	0	-4.14313	-4.17439	-3.71357	-6.62672	-3.85015	-2.3979	-1.09861	-3.61092	-3.43399	-3.43399	-1.09861	-4.36945
leucovorin	-6.85961	-5.8999	-5.8999	-7.18311	-3.3673	-6.10702	-5.63835	-6.55251	-6.16752	0	-4.44265	-6.37843	-5.2832	-7.04665	-3.3673	-3.3673	-6.10702	-4.04305	1.89474	-6.16752	-5.1299	-6.76734	-5.53339	-3.3673	-3.3673	-7.13966	0	0	-3.3673	0	-6.22456	2.14861	-7.79852	-6.91672	1.56241	-5.82008	0	-6.76734	2.08625	-6.32972	-9.26454	-6.46925	-4.94876	-3.3673	-6.22456	-6.04263	-6.04263	-3.3673	-6.99668
novobiocin	-5.14166	-4.18965	-4.18965	-5.46383	-1.79176	-4.39445	-3.93183	-4.83628	-4.45435	0	-2.77259	-4.66344	-3.58352	-5.32788	-1.79176	-1.79176	-4.39445	-2.3979	-6.80904	-4.45435	-3.43399	-5.04986	-3.82864	-1.79176	-1.79176	3.75241	0	0	-1.79176	0	-4.51086	-3.93183	-6.07764	-5.1985	-4.51086	-4.11087	0	-5.04986	-5.0814	-4.61512	-7.54221	-4.75359	-3.2581	-1.79176	-4.51086	-4.33073	-4.33073	-1.79176	-5.27811
chlorisondamine	-4.23411	-3.29584	-3.29584	-4.55388	-1.09861	-3.49651	-3.04452	-3.93183	-3.55535	0	-1.94591	-3.7612	-2.70805	-4.41884	-1.09861	-1.09861	-3.49651	-1.60944	-5.8944	-3.55535	-2.56495	-4.14313	-2.94444	-1.09861	-1.09861	3.27611	0	0	-1.09861	0	-3.61092	-3.04452	-5.16479	-4.29046	-3.61092	-3.21888	0	-4.14313	-4.17439	-3.71357	-6.62672	-3.85015	-2.3979	-1.09861	-3.61092	-3.43399	-3.43399	-1.09861	-4.36945
alprazolam	-5.47646	-4.52179	-4.52179	-5.79909	-2.07944	-4.72739	-4.26268	-5.17048	-4.78749	0	-3.09104	-4.99721	-3.91202	-5.66296	-2.07944	-2.07944	-4.72739	-2.70805	-7.1452	-4.78749	-3.7612	2.40247	-4.15888	-2.07944	-2.07944	3.12956	0	0	-2.07944	0	-4.84419	-4.26268	1.37351	2.25358	-4.84419	-4.44265	0	-5.3845	-5.4161	-4.94876	-0.0915672	-5.0876	-3.58352	-2.07944	-4.84419	-4.66344	-4.66344	-2.07944	-5.61313
domperidone	-4.63473	-3.68888	-3.68888	-4.95583	-1.38629	-3.89182	-3.43399	-4.33073	-3.95124	0	-2.30259	-4.15888	-3.09104	-4.82028	-1.38629	-1.38629	-3.89182	-1.94591	-6.29895	-3.95124	-2.94444	-4.54329	-3.3322	-1.38629	-1.38629	3.56725	0	0	-1.38629	0	-4.00733	-3.43399	-5.56834	-4.69135	-4.00733	-3.61092	0	-4.54329	-4.57471	-4.11087	-7.03174	-4.2485	-2.77259	-1.38629	-4.00733	-3.82864	-3.82864	-1.38629	-4.77068
quinacrine	-5.72685	-4.77068	-4.77068	-6.04973	-2.30259	-4.97673	-4.51086	-5.42053	-5.03695	0	-3.3322	-5.24702	-4.15888	1.87346	-2.30259	-2.30259	3.50317	-2.94444	-7.39634	-5.03695	3.77963	-5.63479	-4.40672	-2.30259	-2.30259	1.78061	0	0	-2.30259	0	-5.09375	-4.51086	-6.66441	-5.78383	-5.09375	-4.69135	0	-5.63479	-5.66643	-5.1985	-8.12976	-5.33754	-3.82864	-2.30259	-5.09375	-4.91265	-4.91265	-2.30259	-5.86363
papaverine	-5.14166	-4.18965	-4.18965	-5.46383	-1.79176	-4.39445	-3.93183	-4.83628	-4.45435	0	-2.77259	-4.66344	-3.58352	-5.32788	-1.79176	-1.79176	-4.39445	-2.3979	-6.80904	-4.45435	-3.43399	-5.04986	-3.82864	-1.79176	-1.79176	2.36643	0	0	-1.79176	0	-4.51086	-3.93183	-6.07764	-5.1985	-4.51086	3.67609	0	-5.04986	-5.0814	-4.61512	-7.54221	-4.75359	-3.2581	-1.79176	-4.51086	-4.33073	3.45623	-1.79176	-5.27811
physostigmine	2.46694	-5.45959	-5.45959	-6.7417	-2.94444	-5.66643	-5.1985	-6.11147	-5.72685	0	-4.00733	-5.93754	-4.84419	2.97308	-2.94444	-2.94444	-5.66643	-3.61092	-8.08918	-5.72685	3.09562	2.15376	-5.09375	-2.94444	-2.94444	1.78164	0	0	-2.94444	0	-5.78383	-5.1985	-7.35692	2.00447	-5.78383	-5.3799	0	-6.32615	-6.35784	1.89809	-8.82276	-6.02828	-4.51086	-2.94444	-5.78383	-5.60212	-5.60212	-2.94444	-6.55536
dideoxyadenosine	-4.63473	-3.68888	-3.68888	-4.95583	-1.38629	-3.89182	-3.43399	-4.33073	-3.95124	0	-2.30259	-4.15888	-3.09104	-4.82028	-1.38629	-1.38629	-3.89182	-1.94591	-6.29895	3.83572	-2.94444	-4.54329	-3.3322	-1.38629	-1.38629	2.87431	0	0	-1.38629	0	-4.00733	-3.43399	-5.56834	-4.69135	-4.00733	-3.61092	0	-4.54329	-4.57471	-4.11087	-7.03174	-4.2485	-2.77259	-1.38629	-4.00733	-3.82864	-3.82864	-1.38629	-4.77068
quinidine	-5.72685	-4.77068	-4.77068	-6.04973	-2.30259	-4.97673	-4.51086	3.46477	-5.03695	0	-3.3322	-5.24702	-4.15888	-5.9135	-2.30259	-2.30259	-4.97673	-2.94444	-7.39634	-5.03695	-4.00733	-5.63479	-4.40672	-2.30259	-2.30259	1.78061	0	0	-2.30259	0	-5.09375	-4.51086	-6.66441	-5.78383	-5.09375	-4.69135	0	-5.63479	-5.66643	3.28141	-8.12976	-5.33754	-3.82864	-2.30259	-5.09375	-4.91265	-4.91265	-2.30259	-5.86363
amiodarone	-4.91998	-3.97029	-3.97029	-5.24175	-1.60944	-4.17439	-3.71357	-4.61512	-4.23411	0	-2.56495	-4.44265	-3.3673	-5.10595	-1.60944	-1.60944	-4.17439	-2.19722	-6.58617	-4.23411	-3.21888	-4.82831	-3.61092	-1.60944	-1.60944	-5.1985	0	0	-1.60944	0	-4.29046	-3.71357	2.62483	-4.97673	-4.29046	-3.89182	0	-4.82831	-4.85981	-4.39445	-7.3192	-4.5326	4.74244	-1.60944	-4.29046	-4.11087	-4.11087	-1.60944	-5.05625
clozapine	-7.1107	-6.1506	-6.1506	-7.43426	-3.61092	-6.35784	-5.88888	-6.80351	-6.41836	0	-4.69135	-6.62936	-5.53339	0.489199	-3.61092	-3.61092	-6.35784	-4.29046	-8.78217	-6.41836	-5.3799	-7.0184	-5.78383	-3.61092	-3.61092	-7.3908	0	0	-3.61092	0	-6.47543	-5.88888	-8.04975	-7.16781	-6.47543	-6.07074	0	-7.0184	-7.05012	-6.58064	1.73646	-6.72022	-5.1985	-3.61092	-6.47543	-6.29342	-6.29342	-3.61092	-7.24779
pimozide	-4.23411	-3.29584	-3.29584	-4.55388	-1.09861	-3.49651	-3.04452	-3.93183	-3.55535	0	-1.94591	-3.7612	-2.70805	-4.41884	-1.09861	-1.09861	-3.49651	-1.60944	-5.8944	-3.55535	-2.56495	-4.14313	-2.94444	-1.09861	-1.09861	-4.51086	0	0	-1.09861	0	-3.61092	-3.04452	-5.16479	-4.29046	-3.61092	-3.21888	0	-4.14313	-4.17439	-3.71357	-6.62672	-3.85015	-2.3979	-1.09861	-3.61092	-3.43399	-3.43399	-1.09861	-4.36945
puromycin aminonucleoside	-4.91998	-3.97029	-3.97029	-5.24175	-1.60944	-4.17439	-3.71357	-4.61512	-4.23411	0	-2.56495	-4.44265	-3.3673	-5.10595	-1.60944	-1.60944	-4.17439	-2.19722	-6.58617	-4.23411	-3.21888	-4.82831	-3.61092	-1.60944	-1.60944	-5.1985	0	0	-1.60944	0	-4.29046	-3.71357	-5.85507	-4.97673	-4.29046	-3.89182	0	-4.82831	-4.85981	-4.39445	-7.3192	-4.5326	-3.04452	-1.60944	-4.29046	-4.11087	4.77443	-1.60944	-5.05625
thioridazine	-4.63473	-3.68888	-3.68888	-4.95583	-1.38629	-3.89182	-3.43399	-4.33073	-3.95124	0	-2.30259	-4.15888	-3.09104	-4.82028	-1.38629	-1.38629	-3.89182	-1.94591	-6.29895	-3.95124	-2.94444	-4.54329	-3.3322	-1.38629	-1.38629	-4.91265	0	0	-1.38629	0	-4.00733	-3.43399	-5.56834	-4.69135	-4.00733	-3.61092	0	-4.54329	-4.57471	4.36903	-7.03174	-4.2485	-2.77259	-1.38629	-4.00733	-3.82864	-3.82864	-1.38629	-4.77068
promethazine	-4.23411	-3.29584	-3.29584	-4.55388	-1.09861	-3.49651	-3.04452	-3.93183	-3.55535	0	-1.94591	-3.7612	-2.70805	-4.41884	-1.09861	-1.09861	-3.49651	-1.60944	-5.8944	-3.55535	-2.56495	-4.14313	-2.94444	-1.09861	-1.09861	-4.51086	0	0	-1.09861	0	-3.61092	-3.04452	-5.16479	-4.29046	-3.61092	-3.21888	0	-4.14313	-4.17439	4.07339	-6.62672	-3.85015	-2.3979	-1.09861	-3.61092	-3.43399	-3.43399	-1.09861	-4.36945
ondansetron	-5.32301	-4.36945	-4.36945	-5.64545	-1.94591	-4.57471	-4.11087	-5.01728	-4.63473	0	-2.94444	-4.84419	-3.7612	-5.50939	-1.94591	-1.94591	-4.57471	-2.56495	-6.99118	-4.63473	-3.61092	-5.23111	-4.00733	-1.94591	-1.94591	-5.60212	0	0	-1.94591	0	-4.69135	-4.11087	-6.25958	-5.3799	-4.69135	-4.29046	0	-5.23111	-5.26269	-4.79579	1.16086	-4.93447	-3.43399	-1.94591	-4.69135	-4.51086	-4.51086	-1.94591	-5.45959
coumarins	-5.83188	-4.8752	2.91177	-6.15486	-2.3979	-5.0814	-4.61512	-5.52545	-5.14166	0	-3.43399	-5.35186	-4.26268	-6.01859	-2.3979	-2.3979	-5.0814	-3.04452	-7.50163	-5.14166	3.67609	-5.73979	3.27611	-2.3979	-2.3979	-6.11147	0	0	-2.3979	0	-5.1985	-4.61512	-6.76964	-5.88888	-5.1985	-4.79579	0	2.74011	-5.77144	-5.3033	-8.2351	-5.44242	-3.93183	-2.3979	-5.1985	2.76969	-5.01728	-2.3979	-5.96871
cytokinins	-5.83188	2.91177	2.91177	-6.15486	-2.3979	-5.0814	-4.61512	-5.52545	-5.14166	0	-3.43399	-5.35186	-4.26268	-6.01859	5.38907	-2.3979	-5.0814	-3.04452	-7.50163	-5.14166	-4.11087	-5.73979	-4.51086	-2.3979	-2.3979	-6.11147	0	0	-2.3979	0	-5.1985	-4.61512	-6.76964	3.50719	-5.1985	-4.79579	0	-5.73979	-5.77144	-5.3033	-8.2351	-5.44242	-3.93183	-2.3979	-5.1985	-5.01728	-5.01728	-2.3979	-5.96871
rhodamines	-6.16752	2.57748	2.57748	-6.49072	-2.70805	-5.4161	-4.94876	-5.86079	-5.47646	0	-3.7612	-5.68698	-4.59512	-6.35437	-2.70805	-2.70805	2.37087	-3.3673	-7.83795	-5.47646	-4.44265	-6.07535	-4.84419	5.07892	-2.70805	-6.44731	0	0	-2.70805	0	-5.53339	-4.94876	-7.10579	-6.22456	-5.53339	-5.1299	0	2.40456	1.67994	-5.63835	-8.57149	-5.77765	-4.26268	-2.70805	2.25358	-5.35186	-5.35186	-2.70805	-6.30445
ethidium	-5.83188	-4.8752	-4.8752	-6.15486	-2.3979	-5.0814	-4.61512	2.26151	-5.14166	0	-3.43399	-5.35186	-4.26268	-6.01859	-2.3979	-2.3979	2.70556	-3.04452	-7.50163	2.6453	-4.11087	-5.73979	-4.51086	-2.3979	-2.3979	-6.11147	0	0	-2.3979	0	-5.1985	-4.61512	-6.76964	-5.88888	-5.1985	-4.79579	0	-5.73979	-5.77144	3.1766	-8.2351	-5.44242	-3.93183	-2.3979	2.58847	-5.01728	2.76969	-2.3979	-5.96871
nocodazole	0.733381	-6.09357	-6.09357	1.10277	-3.55535	-6.30079	-5.83188	-6.74641	-6.3613	0	-4.63473	1.90762	-5.47646	0.546317	-3.55535	-3.55535	1.48618	3.55286	-8.72502	-6.3613	-5.32301	-6.9613	-5.72685	-3.55535	4.23162	-7.33368	0	0	-3.55535	0	3.56546	1.95508	-0.20564	-7.1107	2.75459	-6.01372	0	0.825671	2.40306	-6.52356	-9.45868	-6.66313	-5.14166	-3.55535	-6.41836	-6.23637	-6.23637	-3.55535	-7.19068
nalidixic acid	-4.23411	-3.29584	-3.29584	-4.55388	-1.09861	-3.49651	-3.04452	-3.93183	-3.55535	0	-1.94591	-3.7612	-2.70805	-4.41884	-1.09861	-1.09861	-3.49651	-1.60944	-5.8944	-3.55535	-2.56495	-4.14313	-2.94444	-1.09861	-1.09861	-4.51086	0	0	-1.09861	0	-3.61092	-3.04452	-5.16479	-4.29046	-3.61092	-3.21888	0	-4.14313	-4.17439	-3.71357	-6.62672	-3.85015	-2.3979	-1.09861	-3.61092	-3.43399	-3.43399	-1.09861	-4.36945
oxolinic acid	-5.47646	-4.52179	-4.52179	-5.79909	-2.07944	-4.72739	-4.26268	-5.17048	-4.78749	0	-3.09104	-4.99721	-3.91202	-5.66296	-2.07944	-2.07944	-4.72739	-2.70805	-7.1452	-4.78749	-3.7612	-5.3845	-4.15888	-2.07944	-2.07944	-5.75574	0	0	-2.07944	0	-4.84419	-4.26268	-6.41346	-5.53339	-4.84419	-4.44265	0	-5.3845	-5.4161	-4.94876	-7.87853	-5.0876	-3.58352	-2.07944	-4.84419	-4.66344	-4.66344	-2.07944	-5.61313
proflavine	-4.23411	-3.29584	-3.29584	-4.55388	-1.09861	-3.49651	-3.04452	-3.93183	-3.55535	0	-1.94591	-3.7612	-2.70805	-4.41884	-1.09861	-1.09861	-3.49651	-1.60944	-5.8944	-3.55535	-2.56495	-4.14313	-2.94444	-1.09861	-1.09861	-4.51086	0	0	-1.09861	0	-3.61092	-3.04452	-5.16479	-4.29046	-3.61092	4.56809	0	-4.14313	-4.17439	-3.71357	-6.62672	-3.85015	-2.3979	-1.09861	-3.61092	-3.43399	-3.43399	-1.09861	-4.36945
cladribine	-4.63473	-3.68888	-3.68888	-4.95583	-1.38629	-3.89182	-3.43399	-4.33073	-3.95124	0	-2.30259	-4.15888	-3.09104	-4.82028	-1.38629	-1.38629	-3.89182	-1.94591	-6.29895	-3.95124	-2.94444	-4.54329	-3.3322	-1.38629	-1.38629	-4.91265	0	0	-1.38629	0	-4.00733	-3.43399	-5.56834	-4.69135	3.77963	-3.61092	0	-4.54329	3.21226	-4.11087	-7.03174	-4.2485	-2.77259	-1.38629	-4.00733	-3.82864	-3.82864	-1.38629	-4.77068
vidarabine	-5.14166	-4.18965	-4.18965	-5.46383	-1.79176	-4.39445	-3.93183	-4.83628	-4.45435	0	-2.77259	-4.66344	-3.58352	-5.32788	-1.79176	-1.79176	-4.39445	-2.3979	-6.80904	-4.45435	-3.43399	-5.04986	-3.82864	-1.79176	-1.79176	-5.42053	0	0	-1.79176	0	-4.51086	-3.93183	-6.07764	-5.1985	3.27611	-4.11087	0	2.73711	3.3985	-4.61512	-7.54221	-4.75359	-3.2581	-1.79176	-4.51086	-4.33073	-4.33073	-1.79176	-5.27811
droperidol	-4.23411	-3.29584	-3.29584	-4.55388	-1.09861	-3.49651	-3.04452	-3.93183	-3.55535	0	-1.94591	-3.7612	-2.70805	-4.41884	-1.09861	-1.09861	-3.49651	-1.60944	-5.8944	-3.55535	-2.56495	-4.14313	-2.94444	-1.09861	-1.09861	-4.51086	0	0	-1.09861	0	-3.61092	-3.04452	-5.16479	-4.29046	-3.61092	-3.21888	0	-4.14313	-4.17439	-3.71357	-6.62672	-3.85015	-2.3979	-1.09861	-3.61092	-3.43399	-3.43399	-1.09861	-4.36945
ganciclovir	-5.14166	-4.18965	-4.18965	-5.46383	-1.79176	3.39252	-3.93183	-4.83628	-4.45435	0	-2.77259	-4.66344	-3.58352	-5.32788	-1.79176	-1.79176	-4.39445	-2.3979	-6.80904	-4.45435	-3.43399	-5.04986	-3.82864	-1.79176	-1.79176	-5.42053	0	0	-1.79176	0	-4.51086	-3.93183	-6.07764	-5.1985	-4.51086	-4.11087	0	-5.04986	2.70556	-4.61512	-7.54221	-4.75359	-3.2581	-1.79176	3.96905	-4.33073	-4.33073	-1.79176	-5.27811
oxacillin	-4.63473	-3.68888	-3.68888	-4.95583	-1.38629	-3.89182	-3.43399	-4.33073	-3.95124	0	-2.30259	-4.15888	-3.09104	-4.82028	-1.38629	-1.38629	-3.89182	-1.94591	-6.29895	-3.95124	5.53547	-4.54329	-3.3322	-1.38629	-1.38629	-4.91265	0	0	-1.38629	0	-4.00733	-3.43399	-5.56834	-4.69135	-4.00733	-3.61092	0	-4.54329	-4.57471	-4.11087	-7.03174	-4.2485	-2.77259	-1.38629	-4.00733	-3.82864	-3.82864	-1.38629	-4.77068
propidium	-5.47646	3.26518	-4.52179	-5.79909	-2.07944	-4.72739	-4.26268	-5.17048	-4.78749	0	-3.09104	-4.99721	-3.91202	-5.66296	-2.07944	-2.07944	-4.72739	-2.70805	-7.1452	-4.78749	-3.7612	-5.3845	-4.15888	-2.07944	-2.07944	-5.75574	0	0	-2.07944	0	-4.84419	-4.26268	-6.41346	-5.53339	-4.84419	-4.44265	0	2.40247	2.37087	-4.94876	-7.87853	-5.0876	-3.58352	-2.07944	-4.84419	-4.66344	-4.66344	-2.07944	2.86678
ketanserin	0.0116912	-6.81454	-6.81454	-8.09895	-4.26268	-7.02198	-6.55251	-7.46794	-7.08255	0	-5.35186	-7.2937	-6.19644	-0.175449	-4.26268	-4.26268	-7.02198	-4.94876	-9.44707	-7.08255	-6.04263	-7.68294	-6.44731	-4.26268	-4.26268	-8.05548	0	0	-4.26268	0	-7.13966	-6.55251	0.170735	-7.83241	-7.13966	-6.73459	0	-7.68294	-7.71468	0.542025	1.73291	-7.38461	-5.86079	-4.26268	-7.13966	-6.9575	-6.9575	-4.26268	-7.91242
atracurium	-4.63473	-3.68888	-3.68888	-4.95583	-1.38629	-3.89182	-3.43399	-4.33073	-3.95124	0	-2.30259	-4.15888	-3.09104	-4.82028	-1.38629	-1.38629	-3.89182	-1.94591	-6.29895	-3.95124	-2.94444	-4.54329	-3.3322	-1.38629	-1.38629	-4.91265	0	0	-1.38629	0	-4.00733	-3.43399	-5.56834	-4.69135	-4.00733	-3.61092	0	-4.54329	-4.57471	-4.11087	-7.03174	-4.2485	-2.77259	-1.38629	-4.00733	-3.82864	-3.82864	-1.38629	-4.77068
eosine yellowish-(ys)	-5.32301	-4.36945	-4.36945	-5.64545	-1.94591	-4.57471	-4.11087	2.76969	-4.63473	0	-2.94444	-4.84419	-3.7612	-5.50939	-1.94591	-1.94591	-4.57471	-2.56495	-6.99118	-4.63473	-3.61092	-5.23111	-4.00733	-1.94591	-1.94591	-5.60212	0	0	-1.94591	0	-4.69135	-4.11087	-6.25958	-5.3799	-4.69135	-4.29046	0	-5.23111	-5.26269	-4.79579	-7.72445	-4.93447	-3.43399	-1.94591	-4.69135	-4.51086	-4.51086	-1.94591	2.32738
4-nitroquinoline-1-oxide	-5.32301	-4.36945	-4.36945	-5.64545	-1.94591	-4.57471	-4.11087	-5.01728	-4.63473	0	-2.94444	-4.84419	-3.7612	-5.50939	-1.94591	-1.94591	-4.57471	-2.56495	-6.99118	-4.63473	-3.61092	-5.23111	4.87797	-1.94591	-1.94591	-5.60212	0	0	-1.94591	0	-4.69135	-4.11087	-6.25958	-5.3799	3.78856	-4.29046	0	-5.23111	-5.26269	-4.79579	-7.72445	-4.93447	-3.43399	-1.94591	-4.69135	-4.51086	-4.51086	-1.94591	-5.45959
tubercidin	-4.23411	-3.29584	-3.29584	-4.55388	-1.09861	-3.49651	-3.04452	-3.93183	-3.55535	0	-1.94591	-3.7612	-2.70805	-4.41884	-1.09861	-1.09861	-3.49651	-1.60944	-5.8944	-3.55535	-2.56495	-4.14313	-2.94444	-1.09861	-1.09861	-4.51086	0	0	-1.09861	0	-3.61092	-3.04452	-5.16479	-4.29046	-3.61092	-3.21888	0	3.64383	-4.17439	-3.71357	-6.62672	-3.85015	-2.3979	-1.09861	-3.61092	-3.43399	-3.43399	-1.09861	-4.36945
zeatin	-5.47646	3.26518	-4.52179	-5.79909	-2.07944	-4.72739	-4.26268	-5.17048	-4.78749	0	-3.09104	-4.99721	-3.91202	-5.66296	-2.07944	-2.07944	-4.72739	-2.70805	-7.1452	-4.78749	-3.7612	-5.3845	-4.15888	-2.07944	-2.07944	-5.75574	0	0	-2.07944	0	-4.84419	-4.26268	-6.41346	3.86268	-4.84419	-4.44265	0	-5.3845	-5.4161	-4.94876	-7.87853	-5.0876	-3.58352	-2.07944	-4.84419	-4.66344	-4.66344	-2.07944	-5.61313
theobromine	-4.23411	-3.29584	-3.29584	-4.55388	-1.09861	-3.49651	-3.04452	-3.93183	-3.55535	0	-1.94591	-3.7612	-2.70805	-4.41884	-1.09861	-1.09861	-3.49651	-1.60944	-5.8944	-3.55535	-2.56495	-4.14313	-2.94444	-1.09861	-1.09861	-4.51086	0	0	-1.09861	0	-3.61092	-3.04452	-5.16479	-4.29046	-3.61092	-3.21888	0	-4.14313	-4.17439	-3.71357	-6.62672	3.93682	-2.3979	-1.09861	-3.61092	-3.43399	-3.43399	-1.09861	-4.36945
diazoxide	-4.23411	-3.29584	-3.29584	-4.55388	-1.09861	-3.49651	-3.04452	-3.93183	-3.55535	0	-1.94591	-3.7612	-2.70805	-4.41884	-1.09861	-1.09861	-3.49651	-1.60944	-5.8944	-3.55535	-2.56495	-4.14313	-2.94444	-1.09861	-1.09861	-4.51086	0	0	-1.09861	0	-3.61092	-3.04452	-5.16479	-4.29046	-3.61092	-3.21888	0	-4.14313	-4.17439	-3.71357	-6.62672	-3.85015	-2.3979	-1.09861	-3.61092	-3.43399	-3.43399	-1.09861	-4.36945
2-aminopurine	-4.23411	-3.29584	-3.29584	-4.55388	-1.09861	-3.49651	-3.04452	-3.93183	-3.55535	0	-1.94591	-3.7612	-2.70805	-4.41884	-1.09861	-1.09861	-3.49651	-1.60944	-5.8944	-3.55535	-2.56495	-4.14313	-2.94444	-1.09861	-1.09861	-4.51086	0	0	-1.09861	0	-3.61092	-3.04452	-5.16479	-4.29046	-3.61092	-3.21888	0	-4.14313	-4.17439	-3.71357	-6.62672	-3.85015	-2.3979	-1.09861	-3.61092	-3.43399	-3.43399	-1.09861	-4.36945
beta-naphthoflavone	3.33824	-4.18965	-4.18965	-5.46383	-1.79176	-4.39445	-3.93183	-4.83628	-4.45435	0	-2.77259	-4.66344	-3.58352	3.15203	-1.79176	-1.79176	-4.39445	-2.3979	-6.80904	4.02556	-3.43399	-5.04986	-3.82864	-1.79176	-1.79176	-5.42053	0	0	-1.79176	0	-4.51086	-3.93183	-6.07764	-5.1985	-4.51086	-4.11087	0	-5.04986	-5.0814	-4.61512	-7.54221	-4.75359	-3.2581	-1.79176	-4.51086	-4.33073	-4.33073	-1.79176	-5.27811
kinetin	-6.3613	2.38429	-5.40268	1.10236	-2.89037	-5.60947	-5.14166	-6.05444	-5.66988	0	-3.95124	4.471	-4.78749	-6.54822	-2.89037	-2.89037	-5.60947	-3.55535	-8.03204	-5.66988	-4.63473	-6.2691	-5.03695	-2.89037	-2.89037	-6.64118	0	0	-2.89037	0	2.06012	-5.14166	-7.2998	-6.41836	-5.72685	-5.32301	0	1.51787	-6.30079	-5.83188	-8.76561	-5.97126	-4.45435	-2.89037	-5.72685	-5.54518	-5.54518	-2.89037	-6.49828
perindopril	-4.23411	-3.29584	-3.29584	-4.55388	-1.09861	-3.49651	-3.04452	3.85514	-3.55535	0	-1.94591	-3.7612	-2.70805	-4.41884	-1.09861	-1.09861	-3.49651	-1.60944	-5.8944	-3.55535	-2.56495	-4.14313	-2.94444	-1.09861	-1.09861	-4.51086	0	0	-1.09861	0	-3.61092	-3.04452	-5.16479	-4.29046	-3.61092	-3.21888	0	-4.14313	-4.17439	-3.71357	-6.62672	-3.85015	-2.3979	-1.09861	-3.61092	-3.43399	-3.43399	-1.09861	-4.36945
alpha-tocopherol	-5.47646	-4.52179	-4.52179	-5.79909	-2.07944	-4.72739	-4.26268	-5.17048	-4.78749	0	-3.09104	-4.99721	-3.91202	-5.66296	-2.07944	-2.07944	-4.72739	-2.70805	-7.1452	-4.78749	-3.7612	-5.3845	-4.15888	-2.07944	-2.07944	-5.75574	0	0	-2.07944	0	2.94278	-4.26268	1.37351	-5.53339	-4.84419	-4.44265	0	-5.3845	3.06381	-4.94876	-7.87853	-5.0876	-3.58352	-2.07944	-4.84419	-4.66344	-4.66344	-2.07944	2.17384
allopurinol	2.3105	-4.52179	-4.52179	-5.79909	-2.07944	-4.72739	-4.26268	-5.17048	-4.78749	0	-3.09104	-4.99721	-3.91202	2.12401	-2.07944	-2.07944	-4.72739	-2.70805	-7.1452	-4.78749	-3.7612	-5.3845	-4.15888	-2.07944	-2.07944	-5.75574	0	0	-2.07944	0	-4.84419	-4.26268	-6.41346	-5.53339	-4.84419	3.34432	0	-5.3845	-5.4161	-4.94876	-7.87853	-5.0876	-3.58352	-2.07944	-4.84419	-4.66344	-4.66344	-2.07944	-5.61313
5,7-dihydroxytryptamine	1.6934	-5.1358	-5.1358	-6.41673	-2.63906	-5.34233	-4.8752	-5.7869	-5.40268	0	-3.68888	-5.61313	-4.52179	1.50657	-2.63906	-2.63906	-5.34233	-3.29584	-7.76387	-5.40268	-4.36945	-6.00141	-4.77068	-2.63906	-2.63906	-6.37332	0	0	-2.63906	0	-5.45959	-4.8752	-7.03174	-6.1506	-5.45959	-5.05625	0	-6.00141	-6.03309	2.22245	1.23512	-5.70378	-4.18965	-2.63906	3.02032	-5.27811	-5.27811	-2.63906	1.55649
silymarin	-5.32301	-4.36945	-4.36945	-5.64545	-1.94591	-4.57471	-4.11087	-5.01728	-4.63473	0	-2.94444	-4.84419	-3.7612	-5.50939	-1.94591	-1.94591	-4.57471	-2.56495	-6.99118	-4.63473	-3.61092	-5.23111	-4.00733	-1.94591	-1.94591	-5.60212	0	0	-1.94591	0	-4.69135	-4.11087	-6.25958	-5.3799	-4.69135	-4.29046	0	2.55586	2.52428	-4.79579	-7.72445	-4.93447	-3.43399	-1.94591	-4.69135	-4.51086	-4.51086	-1.94591	-5.45959
albendazole	-4.23411	-3.29584	-3.29584	-4.55388	-1.09861	-3.49651	-3.04452	-3.93183	-3.55535	0	-1.94591	-3.7612	-2.70805	-4.41884	-1.09861	-1.09861	-3.49651	-1.60944	-5.8944	-3.55535	-2.56495	-4.14313	-2.94444	-1.09861	-1.09861	-4.51086	0	0	-1.09861	0	-3.61092	-3.04452	-5.16479	-4.29046	-3.61092	-3.21888	0	-4.14313	-4.17439	-3.71357	-6.62672	-3.85015	-2.3979	-1.09861	-3.61092	-3.43399	-3.43399	-1.09861	-4.36945
ochratoxins	-5.32301	-4.36945	-4.36945	-5.64545	-1.94591	-4.57471	-4.11087	-5.01728	-4.63473	0	-2.94444	-4.84419	-3.7612	-5.50939	-1.94591	-1.94591	-4.57471	-2.56495	-6.99118	-4.63473	-3.61092	-5.23111	-4.00733	-1.94591	-1.94591	-5.60212	0	0	-1.94591	0	-4.69135	-4.11087	-6.25958	-5.3799	-4.69135	-4.29046	0	2.55586	-5.26269	-4.79579	-7.72445	-4.93447	-3.43399	-1.94591	-4.69135	-4.51086	-4.51086	-1.94591	-5.45959
nomifensine	-5.14166	-4.18965	-4.18965	-5.46383	-1.79176	-4.39445	-3.93183	-4.83628	-4.45435	0	-2.77259	-4.66344	-3.58352	-5.32788	-1.79176	-1.79176	-4.39445	-2.3979	-6.80904	3.33262	-3.43399	-5.04986	-3.82864	-1.79176	-1.79176	-5.42053	0	0	-1.79176	0	-4.51086	-3.93183	1.70932	-5.1985	-4.51086	-4.11087	0	-5.04986	-5.0814	-4.61512	0.244754	-4.75359	-3.2581	-1.79176	-4.51086	-4.33073	-4.33073	-1.79176	-5.27811
benzoflavones	3.40884	-4.52179	-4.52179	-5.79909	-2.07944	-4.72739	-4.26268	-5.17048	-4.78749	0	-3.09104	-4.99721	-3.91202	3.22234	-2.07944	-2.07944	-4.72739	-2.70805	-7.1452	2.99948	-3.7612	-5.3845	-4.15888	-2.07944	-2.07944	-5.75574	0	0	-2.07944	0	-4.84419	-4.26268	1.37351	-5.53339	-4.84419	-4.44265	0	-5.3845	-5.4161	-4.94876	-7.87853	2.69937	-3.58352	-2.07944	-4.84419	-4.66344	-4.66344	-2.07944	-5.61313
ibogaine	-5.14166	-4.18965	-4.18965	-5.46383	-1.79176	-4.39445	-3.93183	-4.83628	-4.45435	0	-2.77259	-4.66344	-3.58352	-5.32788	-1.79176	-1.79176	-4.39445	-2.3979	-6.80904	-4.45435	-3.43399	-5.04986	-3.82864	-1.79176	-1.79176	-5.42053	0	0	-1.79176	0	-4.51086	-3.93183	-6.07764	-5.1985	-4.51086	-4.11087	0	-5.04986	-5.0814	-4.61512	0.937693	-4.75359	-3.2581	-1.79176	-4.51086	-4.33073	-4.33073	-1.79176	-5.27811
oxazepam	-5.14166	-4.18965	-4.18965	-5.46383	-1.79176	-4.39445	-3.93183	-4.83628	-4.45435	0	-2.77259	-4.66344	-3.58352	-5.32788	-1.79176	-1.79176	-4.39445	-2.3979	-6.80904	-4.45435	-3.43399	3.43005	-3.82864	-1.79176	-1.79176	-5.42053	0	0	-1.79176	0	-4.51086	3.85514	-6.07764	3.28141	-4.51086	-4.11087	0	-5.04986	-5.0814	-4.61512	-7.54221	-4.75359	-3.2581	-1.79176	-4.51086	-4.33073	-4.33073	-1.79176	-5.27811
mibefradil	-4.63473	-3.68888	-3.68888	-4.95583	-1.38629	-3.89182	-3.43399	-4.33073	-3.95124	0	-2.30259	-4.15888	-3.09104	-4.82028	-1.38629	-1.38629	-3.89182	-1.94591	-6.29895	-3.95124	-2.94444	-4.54329	-3.3322	-1.38629	-1.38629	-4.91265	0	0	-1.38629	0	-4.00733	-3.43399	-5.56834	-4.69135	-4.00733	4.17605	0	-4.54329	-4.57471	-4.11087	-7.03174	-4.2485	-2.77259	-1.38629	-4.00733	-3.82864	-3.82864	-1.38629	-4.77068
curare	-4.63473	-3.68888	-3.68888	-4.95583	-1.38629	-3.89182	-3.43399	-4.33073	-3.95124	0	-2.30259	-4.15888	-3.09104	-4.82028	-1.38629	-1.38629	-3.89182	-1.94591	-6.29895	-3.95124	-2.94444	-4.54329	-3.3322	-1.38629	-1.38629	-4.91265	0	0	-1.38629	0	-4.00733	-3.43399	-5.56834	-4.69135	-4.00733	-3.61092	0	-4.54329	-4.57471	-4.11087	-7.03174	-4.2485	-2.77259	-1.38629	-4.00733	-3.82864	-3.82864	-1.38629	3.70922
chlorothiazide	-4.91998	-3.97029	-3.97029	-5.24175	-1.60944	-4.17439	-3.71357	3.17185	-4.23411	0	-2.56495	-4.44265	-3.3673	-5.10595	-1.60944	-1.60944	-4.17439	-2.19722	-6.58617	-4.23411	-3.21888	-4.82831	-3.61092	-1.60944	-1.60944	-5.1985	0	0	-1.60944	0	-4.29046	-3.71357	-5.85507	-4.97673	-4.29046	-3.89182	0	-4.82831	-4.85981	-4.39445	-7.3192	-4.5326	-3.04452	-1.60944	-4.29046	-4.11087	-4.11087	-1.60944	-5.05625
tolonium chloride	3.15224	-3.68888	-3.68888	-4.95583	-1.38629	-3.89182	-3.43399	-4.33073	-3.95124	0	-2.30259	-4.15888	-3.09104	2.96669	-1.38629	-1.38629	-3.89182	-1.94591	-6.29895	-3.95124	-2.94444	-4.54329	-3.3322	-1.38629	-1.38629	-4.91265	0	0	-1.38629	0	-4.00733	-3.43399	-5.56834	-4.69135	-4.00733	-3.61092	0	-4.54329	-4.57471	-4.11087	-7.03174	-4.2485	-2.77259	-1.38629	-4.00733	-3.82864	-3.82864	-1.38629	-4.77068
tocopherols	-5.32301	-4.36945	-4.36945	-5.64545	-1.94591	-4.57471	-4.11087	-5.01728	-4.63473	0	-2.94444	-4.84419	-3.7612	-5.50939	-1.94591	-1.94591	-4.57471	-2.56495	-6.99118	-4.63473	-3.61092	-5.23111	-4.00733	-1.94591	-1.94591	-5.60212	0	0	-1.94591	0	-4.69135	-4.11087	-6.25958	-5.3799	-4.69135	-4.29046	0	-5.23111	-5.26269	-4.79579	-7.72445	-4.93447	-3.43399	-1.94591	-4.69135	-4.51086	-4.51086	-1.94591	-5.45959
dicumarol	-5.32301	-4.36945	-4.36945	-5.64545	-1.94591	-4.57471	-4.11087	-5.01728	-4.63473	0	-2.94444	-4.84419	-3.7612	-5.50939	-1.94591	-1.94591	-4.57471	-2.56495	-6.99118	-4.63473	-3.61092	-5.23111	-4.00733	-1.94591	-1.94591	-5.60212	0	0	-1.94591	0	-4.69135	-4.11087	1.52739	-5.3799	3.78856	-4.29046	0	-5.23111	-5.26269	-4.79579	-7.72445	2.85249	-3.43399	-1.94591	-4.69135	-4.51086	-4.51086	-1.94591	2.32738
quinacrine mustard	-4.23411	-3.29584	-3.29584	-4.55388	-1.09861	-3.49651	-3.04452	-3.93183	-3.55535	0	-1.94591	-3.7612	-2.70805	-4.41884	-1.09861	-1.09861	-3.49651	-1.60944	-5.8944	-3.55535	-2.56495	-4.14313	-2.94444	-1.09861	-1.09861	-4.51086	0	0	-1.09861	0	4.17605	-3.04452	-5.16479	-4.29046	-3.61092	-3.21888	0	-4.14313	-4.17439	-3.71357	-6.62672	-3.85015	-2.3979	-1.09861	-3.61092	-3.43399	-3.43399	-1.09861	-4.36945
thiabendazole	-4.63473	-3.68888	-3.68888	-4.95583	-1.38629	-3.89182	-3.43399	-4.33073	-3.95124	0	-2.30259	-4.15888	-3.09104	-4.82028	-1.38629	-1.38629	-3.89182	-1.94591	-6.29895	-3.95124	-2.94444	-4.54329	-3.3322	-1.38629	-1.38629	-4.91265	0	0	-1.38629	0	-4.00733	-3.43399	-5.56834	-4.69135	-4.00733	-3.61092	0	-4.54329	-4.57471	-4.11087	-7.03174	-4.2485	-2.77259	-1.38629	-4.00733	-3.82864	-3.82864	-1.38629	3.01628
devazepide	-5.47646	-4.52179	-4.52179	-5.79909	-2.07944	-4.72739	-4.26268	-5.17048	-4.78749	0	-3.09104	-4.99721	-3.91202	-5.66296	-2.07944	-2.07944	-4.72739	5.07892	-7.1452	-4.78749	-3.7612	-5.3845	-4.15888	-2.07944	-2.07944	-5.75574	0	0	-2.07944	0	-4.84419	-4.26268	1.37351	-5.53339	-4.84419	-4.44265	0	-5.3845	-5.4161	4.22419	-7.87853	-5.0876	-3.58352	-2.07944	-4.84419	-4.66344	-4.66344	-2.07944	-5.61313
isopentenyladenosine	-4.23411	-3.29584	-3.29584	-4.55388	-1.09861	-3.49651	-3.04452	-3.93183	-3.55535	0	-1.94591	4.02577	-2.70805	-4.41884	-1.09861	-1.09861	-3.49651	-1.60944	-5.8944	-3.55535	-2.56495	-4.14313	-2.94444	-1.09861	-1.09861	-4.51086	0	0	-1.09861	0	-3.61092	-3.04452	-5.16479	-4.29046	-3.61092	-3.21888	0	-4.14313	-4.17439	-3.71357	-6.62672	-3.85015	-2.3979	-1.09861	-3.61092	-3.43399	-3.43399	-1.09861	-4.36945
benzydamine	-4.63473	-3.68888	-3.68888	-4.95583	-1.38629	-3.89182	-3.43399	-4.33073	-3.95124	0	-2.30259	-4.15888	-3.09104	-4.82028	-1.38629	-1.38629	-3.89182	-1.94591	-6.29895	-3.95124	-2.94444	-4.54329	-3.3322	-1.38629	-1.38629	-4.91265	0	0	-1.38629	0	-4.00733	-3.43399	-5.56834	-4.69135	-4.00733	-3.61092	0	-4.54329	-4.57471	4.36903	-7.03174	-4.2485	-2.77259	-1.38629	-4.00733	-3.82864	-3.82864	-1.38629	-4.77068
cromolyn sodium	-5.47646	-4.52179	-4.52179	-5.79909	-2.07944	-4.72739	3.52429	-5.17048	-4.78749	0	-3.09104	-4.99721	-3.91202	-5.66296	-2.07944	-2.07944	-4.72739	-2.70805	-7.1452	-4.78749	-3.7612	-5.3845	-4.15888	-2.07944	-2.07944	-5.75574	0	0	-2.07944	0	-4.84419	-4.26268	2.06645	-5.53339	-4.84419	-4.44265	0	-5.3845	-5.4161	2.83821	-7.87853	2.69937	4.20345	-2.07944	-4.84419	-4.66344	-4.66344	-2.07944	-5.61313
chlorzoxazone	-4.23411	-3.29584	-3.29584	-4.55388	6.68835	-3.49651	-3.04452	-3.93183	-3.55535	0	-1.94591	-3.7612	-2.70805	-4.41884	-1.09861	-1.09861	-3.49651	-1.60944	-5.8944	-3.55535	-2.56495	-4.14313	-2.94444	-1.09861	-1.09861	-4.51086	0	0	-1.09861	0	-3.61092	-3.04452	-5.16479	-4.29046	-3.61092	-3.21888	0	-4.14313	-4.17439	-3.71357	-6.62672	-3.85015	-2.3979	-1.09861	-3.61092	-3.43399	-3.43399	-1.09861	-4.36945
formyltetrahydrofolates	-5.83188	-4.8752	-4.8752	-6.15486	-2.3979	-5.0814	-4.61512	-5.52545	-5.14166	0	-3.43399	-5.35186	-4.26268	-6.01859	-2.3979	-2.3979	-5.0814	-3.04452	2.48219	-5.14166	-4.11087	-5.73979	-4.51086	-2.3979	-2.3979	-6.11147	0	0	-2.3979	0	-5.1985	-4.61512	-6.76964	-5.88888	-5.1985	-4.79579	0	-5.73979	-5.77144	-5.3033	-8.2351	-5.44242	-3.93183	-2.3979	-5.1985	-5.01728	-5.01728	-2.3979	-5.96871
azaguanine	-4.23411	-3.29584	-3.29584	-4.55388	-1.09861	-3.49651	-3.04452	-3.93183	-3.55535	0	-1.94591	-3.7612	-2.70805	-4.41884	-1.09861	-1.09861	-3.49651	-1.60944	-5.8944	-3.55535	-2.56495	-4.14313	-2.94444	-1.09861	-1.09861	-4.51086	0	0	-1.09861	0	-3.61092	-3.04452	-5.16479	-4.29046	-3.61092	-3.21888	0	-4.14313	-4.17439	-3.71357	-6.62672	-3.85015	-2.3979	-1.09861	-3.61092	-3.43399	-3.43399	-1.09861	-4.36945
fenoldopam	-4.23411	-3.29584	-3.29584	-4.55388	-1.09861	-3.49651	-3.04452	-3.93183	-3.55535	0	-1.94591	-3.7612	-2.70805	-4.41884	-1.09861	-1.09861	-3.49651	-1.60944	-5.8944	-3.55535	-2.56495	-4.14313	-2.94444	-1.09861	-1.09861	-4.51086	0	0	-1.09861	0	-3.61092	-3.04452	-5.16479	-4.29046	-3.61092	-3.21888	0	-4.14313	-4.17439	-3.71357	-6.62672	-3.85015	-2.3979	-1.09861	-3.61092	-3.43399	-3.43399	-1.09861	-4.36945
acenocoumarol	-4.23411	-3.29584	-3.29584	-4.55388	-1.09861	-3.49651	-3.04452	-3.93183	-3.55535	0	-1.94591	-3.7612	-2.70805	-4.41884	-1.09861	-1.09861	-3.49651	-1.60944	-5.8944	-3.55535	-2.56495	-4.14313	-2.94444	-1.09861	-1.09861	-4.51086	0	0	-1.09861	0	-3.61092	-3.04452	-5.16479	-4.29046	-3.61092	-3.21888	0	-4.14313	-4.17439	-3.71357	-6.62672	-3.85015	-2.3979	-1.09861	-3.61092	-3.43399	-3.43399	-1.09861	-4.36945
lyngbya toxins	-4.63473	-3.68888	-3.68888	-4.95583	-1.38629	-3.89182	-3.43399	-4.33073	-3.95124	0	-2.30259	-4.15888	-3.09104	-4.82028	-1.38629	-1.38629	-3.89182	-1.94591	-6.29895	-3.95124	-2.94444	-4.54329	-3.3322	-1.38629	-1.38629	-4.91265	0	0	-1.38629	0	-4.00733	-3.43399	-5.56834	-4.69135	-4.00733	-3.61092	0	-4.54329	-4.57471	-4.11087	-7.03174	-4.2485	-2.77259	-1.38629	-4.00733	-3.82864	-3.82864	-1.38629	-4.77068
alcian blue	-4.23411	-3.29584	-3.29584	-4.55388	-1.09861	-3.49651	-3.04452	-3.93183	-3.55535	0	-1.94591	-3.7612	-2.70805	-4.41884	-1.09861	-1.09861	-3.49651	-1.60944	-5.8944	-3.55535	-2.56495	-4.14313	-2.94444	-1.09861	-1.09861	-4.51086	0	0	-1.09861	0	-3.61092	-3.04452	-5.16479	-4.29046	-3.61092	4.56809	0	-4.14313	-4.17439	-3.71357	-6.62672	-3.85015	-2.3979	-1.09861	-3.61092	-3.43399	-3.43399	-1.09861	-4.36945
hematoxylin	-4.23411	-3.29584	-3.29584	-4.55388	-1.09861	-3.49651	-3.04452	-3.93183	-3.55535	0	-1.94591	-3.7612	-2.70805	-4.41884	-1.09861	-1.09861	-3.49651	-1.60944	-5.8944	-3.55535	-2.56495	-4.14313	-2.94444	-1.09861	-1.09861	-4.51086	0	0	-1.09861	0	-3.61092	-3.04452	-5.16479	-4.29046	-3.61092	-3.21888	0	-4.14313	-4.17439	-3.71357	-6.62672	-3.85015	-2.3979	-1.09861	-3.61092	-3.43399	-3.43399	-1.09861	3.41752
riluzole	-4.23411	-3.29584	-3.29584	-4.55388	-1.09861	-3.49651	-3.04452	-3.93183	-3.55535	0	-1.94591	4.02577	-2.70805	-4.41884	-1.09861	-1.09861	-3.49651	-1.60944	-5.8944	-3.55535	-2.56495	-4.14313	-2.94444	-1.09861	-1.09861	-4.51086	0	0	-1.09861	0	-3.61092	-3.04452	-5.16479	-4.29046	-3.61092	-3.21888	0	-4.14313	-4.17439	-3.71357	-6.62672	-3.85015	-2.3979	-1.09861	-3.61092	-3.43399	-3.43399	-1.09861	-4.36945
rhodamine 123	-5.32301	4.11046	-4.36945	-5.64545	-1.94591	-4.57471	-4.11087	-5.01728	-4.63473	0	-2.94444	-4.84419	-3.7612	2.27758	-1.94591	-1.94591	-4.57471	-2.56495	-6.99118	-4.63473	-3.61092	-5.23111	-4.00733	-1.94591	-1.94591	-5.60212	0	0	-1.94591	0	-4.69135	-4.11087	-6.25958	-5.3799	-4.69135	-4.29046	0	2.55586	-5.26269	-4.79579	-7.72445	-4.93447	-3.43399	-1.94591	-4.69135	-4.51086	-4.51086	-1.94591	-5.45959
pteroylpolyglutamic acids	-6.09357	-5.1358	-5.1358	-6.41673	-2.63906	-5.34233	-4.8752	-5.7869	-5.40268	0	-3.68888	-5.61313	-4.52179	-6.2804	-2.63906	-2.63906	-5.34233	-3.29584	2.50762	-5.40268	-4.36945	-6.00141	-4.77068	-2.63906	-2.63906	-6.37332	0	0	-2.63906	0	-5.45959	-4.8752	-7.03174	-6.1506	-5.45959	-5.05625	0	-6.00141	-6.03309	-5.56452	-8.4974	-5.70378	-4.18965	-2.63906	-5.45959	-5.27811	-5.27811	-2.63906	-6.23048
penicillin g, procaine	-4.63473	-3.68888	-3.68888	-4.95583	-1.38629	-3.89182	-3.43399	-4.33073	-3.95124	0	-2.30259	-4.15888	-3.09104	-4.82028	-1.38629	-1.38629	-3.89182	-1.94591	-6.29895	-3.95124	-2.94444	-4.54329	-3.3322	-1.38629	-1.38629	-4.91265	0	0	-1.38629	0	-4.00733	-3.43399	-5.56834	-4.69135	-4.00733	-3.61092	0	-4.54329	-4.57471	-4.11087	-7.03174	-4.2485	-2.77259	-1.38629	-4.00733	-3.82864	-3.82864	-1.38629	-4.77068
trimetrexate	-4.23411	-3.29584	-3.29584	-4.55388	-1.09861	-3.49651	-3.04452	-3.93183	-3.55535	0	-1.94591	-3.7612	-2.70805	-4.41884	-1.09861	-1.09861	-3.49651	-1.60944	-5.8944	-3.55535	-2.56495	-4.14313	-2.94444	-1.09861	-1.09861	-4.51086	0	0	-1.09861	0	-3.61092	-3.04452	-5.16479	-4.29046	-3.61092	-3.21888	0	-4.14313	3.61258	-3.71357	-6.62672	-3.85015	-2.3979	-1.09861	-3.61092	-3.43399	-3.43399	-1.09861	-4.36945
vindesine	-4.23411	-3.29584	-3.29584	-4.55388	-1.09861	-3.49651	-3.04452	-3.93183	-3.55535	0	-1.94591	-3.7612	-2.70805	-4.41884	-1.09861	-1.09861	-3.49651	-1.60944	-5.8944	-3.55535	-2.56495	-4.14313	-2.94444	-1.09861	-1.09861	-4.51086	0	0	-1.09861	0	-3.61092	-3.04452	-5.16479	-4.29046	-3.61092	-3.21888	0	-4.14313	-4.17439	-3.71357	-6.62672	-3.85015	-2.3979	-1.09861	-3.61092	-3.43399	-3.43399	-1.09861	-4.36945
etodolac	-5.14166	-4.18965	-4.18965	-5.46383	-1.79176	-4.39445	-3.93183	-4.83628	-4.45435	0	-2.77259	-4.66344	-3.58352	-5.32788	-1.79176	-1.79176	-4.39445	-2.3979	-6.80904	-4.45435	-3.43399	-5.04986	-3.82864	-1.79176	-1.79176	-5.42053	0	0	-1.79176	0	-4.51086	-3.93183	2.80766	-5.1985	-4.51086	-4.11087	0	-5.04986	-5.0814	-4.61512	-7.54221	-4.75359	-3.2581	-1.79176	-4.51086	-4.33073	-4.33073	-1.79176	-5.27811
gliotoxin	-5.32301	-4.36945	-4.36945	-5.64545	-1.94591	-4.57471	-4.11087	-5.01728	-4.63473	0	-2.94444	-4.84419	-3.7612	-5.50939	-1.94591	-1.94591	-4.57471	-2.56495	-6.99118	-4.63473	-3.61092	-5.23111	-4.00733	-1.94591	-1.94591	-5.60212	0	0	-1.94591	0	-4.69135	-4.11087	1.52739	-5.3799	-4.69135	-4.29046	0	3.2488	2.52428	-4.79579	-7.72445	-4.93447	-3.43399	-1.94591	-4.69135	-4.51086	-4.51086	-1.94591	-5.45959
griseofulvin	-4.23411	-3.29584	-3.29584	-4.55388	-1.09861	-3.49651	-3.04452	-3.93183	-3.55535	0	-1.94591	-3.7612	-2.70805	-4.41884	-1.09861	-1.09861	-3.49651	-1.60944	-5.8944	-3.55535	-2.56495	-4.14313	-2.94444	-1.09861	-1.09861	-4.51086	0	0	-1.09861	0	4.17605	-3.04452	-5.16479	-4.29046	-3.61092	-3.21888	0	-4.14313	-4.17439	-3.71357	-6.62672	-3.85015	-2.3979	-1.09861	-3.61092	-3.43399	-3.43399	-1.09861	-4.36945
hydroxychloroquine	-4.23411	-3.29584	-3.29584	-4.55388	-1.09861	-3.49651	-3.04452	-3.93183	-3.55535	0	-1.94591	-3.7612	-2.70805	-4.41884	-1.09861	-1.09861	-3.49651	-1.60944	-5.8944	-3.55535	-2.56495	-4.14313	-2.94444	-1.09861	-1.09861	-4.51086	0	0	-1.09861	0	-3.61092	-3.04452	-5.16479	-4.29046	-3.61092	-3.21888	0	3.64383	-4.17439	-3.71357	-6.62672	-3.85015	-2.3979	-1.09861	-3.61092	-3.43399	-3.43399	-1.09861	-4.36945
tacrine	2.55298	-4.96981	-4.96981	-6.24998	-2.48491	-5.17615	-4.70953	2.16657	-5.23644	0	-3.52636	2.34023	-4.35671	3.05927	-2.48491	-2.48491	-5.17615	-3.13549	-7.59689	-5.23644	-4.20469	-5.83481	-4.60517	-2.48491	-2.48491	-6.20658	0	0	-2.48491	0	-5.2933	-4.70953	-6.86485	-5.98394	-5.2933	-4.89035	0	-5.83481	-5.86647	-5.39816	0.149525	-5.53733	-4.02535	-2.48491	-5.2933	-5.11199	2.67498	-2.48491	-6.06379
[truncated: 24 more columns]

## Sheet: add_3_2
Drug	UNIPROT_ID	PMIDs
kynurenic acid	RAGE_HUMAN	1354005
kynurenic acid	NEU2_HUMAN	12391090
kynurenic acid	MOK_HUMAN	1354005
kynurenic acid	5HT2C_HUMAN	8858308;9582253
kynurenic acid	PEN2_HUMAN	1358641
serotonin	A4_HUMAN	11278299;12231467;8626761
serotonin	PSN1_HUMAN	15262269
serotonin	S100B_HUMAN	11872254;12798971;15006498;11718831
serotonin	CLUS_HUMAN	15610943;1536032
serotonin	NP1L1_HUMAN	6145490;238745;7623157;12270048;11449311;6180357;3942868;1699996;688340;7598814;7117390;7139326
serotonin	NCOA6_HUMAN	2536429
serotonin	CATB_HUMAN	11278299;12231467;8626761;9858360
serotonin	C1TC_HUMAN	1275513
serotonin	ODO2_HUMAN	9870749
serotonin	PRIO_HUMAN	6401998;11880895;3564035;14507340;804512
serotonin	RAGE_HUMAN	11600187;7916235;1153456
serotonin	NEU2_HUMAN	1415734;7938357;8254296;3968510;2950833
serotonin	APLP2_HUMAN	8626761
serotonin	SYUG_HUMAN	1533181;885166;12957219;3346672;2862849;11041273
serotonin	MOK_HUMAN	11600187;7916235;1153456
serotonin	BLMH_HUMAN	12909333;12593863;10717436;7679224;11443547;1121333
serotonin	5HT2C_HUMAN	12716407;11641557;12373805;10762339;7736561;11168844;7780647;9165122;12928041;9282925;9326273;11525423;14602579;8566134;10340936;15146953;8542294;15289999;12142539;11564657;10643820;7583341;8319743;12377394;15109520;16010984;10766968;8937789;9427513;12551959;12486144;11248349;11861331;9924841;8783268;7824037;14623358;11734182;9507121;15242780;15673664;15668911;15831837;12218703;10490910;15102340;…
serotonin	JIP1_HUMAN	12145795;10581320;9505884;15792386
serotonin	GFAP_HUMAN	2323038;1355075;2627893;8310791;9582250;15621007;9739098;8082031;7910108;9427479
serotonin	A2MG_HUMAN	11462757;6282885;2514364;6197507;2433298
serotonin	APOE_HUMAN	10198381
serotonin	TRPM2_HUMAN	12787073
serotonin	CAH9_HUMAN	3226372;12091534;1551225;11360670;15922012
serotonin	PEN2_HUMAN	8642411;7714785;2536429;9819144;3370465;7713149;8219035;1658661;8394180;1723152;2894234;8223926;1966052
serotonin	STX1A_HUMAN	15634764;12175857;14642278;11709063
serotonin	SYUA_HUMAN	12732244;12544834;10746727
serotonin	SEPT4_HUMAN	4775586
serotonin	CSEN_HUMAN	12109951
serotonin	SHC1_HUMAN	12226996;11262599
serotonin	CH60_HUMAN	7874266
indoleacetic acids	LRP1_HUMAN	15940868;15681664;11844109
indoleacetic acids	PSN1_HUMAN	15535127
indoleacetic acids	PIN1_HUMAN	12827205;12296383;1332699;9889117;15371311;15208397;11335153;11485992;14628043;15960970;12909722;15514156;14628031;10514379;12553900;9856939;12905024;10508762;10760240;12357639;12878008;12695598;12610625;11884675;15635403;10961944;14614488;11762378;15514147;11574889;15743878;9890827;16210544;12615936;11574870;14681187;12296384;11804817;11641271;14614497;12553910;12036254;11676938;12624772;1465185…
indoleacetic acids	SYUG_HUMAN	8397341;7681406;10988332;10594328;10688974
indoleacetic acids	MOK_HUMAN	9301083
indoleacetic acids	SHC1_HUMAN	10330148
harmine	CDK5_HUMAN	15047157
tyrphostins	NP1L1_HUMAN	15647107;11710966;14749471
tyrphostins	RAGE_HUMAN	11180401
tyrphostins	MOK_HUMAN	11180401
tyrphostins	BCLX_HUMAN	10023775
tyrphostins	5HT2C_HUMAN	10364236
tyrphostins	GRB2_HUMAN	10585878
tyrphostins	SHC1_HUMAN	11016663;12114320;10585878;10446212;10748142;10666084
methotrexate	A4_HUMAN	8982402
methotrexate	LRP1_HUMAN	10999723
methotrexate	PSN2_HUMAN	8347494
methotrexate	C1TC_HUMAN	448608;12482398;6054;15797993;9067281;595493;6458763;1277151;1243674;564273;5150147;4384970;4549304;8819325
methotrexate	PRIO_HUMAN	12196748
methotrexate	NEU2_HUMAN	1722410
methotrexate	TAU_HUMAN	15019310
methotrexate	SYUG_HUMAN	2182444
methotrexate	GLNA_HUMAN	1444793;11986749;9605669
methotrexate	BCLX_HUMAN	9242554
methotrexate	BCL2_HUMAN	10700860;15085385;10470854;12701155;11743658
methotrexate	BLMH_HUMAN	3164731
methotrexate	JIP1_HUMAN	8376410;3024334
methotrexate	A2MG_HUMAN	10811664
methotrexate	CAH9_HUMAN	12051400
methotrexate	APLP1_HUMAN	11778974;12826039;11990517;10230255;10944595
methotrexate	AACT_HUMAN	3819510;1384832
methotrexate	APH1A_HUMAN	7612966
methotrexate	HCD2_HUMAN	4045607
cytochalasin d	A4_HUMAN	7706247
cytochalasin d	PSN1_HUMAN	11055438
cytochalasin d	PIN1_HUMAN	11762378
cytochalasin d	FLNB_HUMAN	15044801;9548476
cytochalasin d	CATB_HUMAN	7706247
cytochalasin d	CTND2_HUMAN	11969288
cytochalasin d	TAU_HUMAN	10232926;10223633
cytochalasin d	FLNA_HUMAN	9430714;11845308
cytochalasin d	SYUG_HUMAN	8993628
cytochalasin d	BLMH_HUMAN	2265208
cytochalasin d	CATK_HUMAN	9272702
cytochalasin d	DLG4_HUMAN	10620493
cytochalasin d	GRB2_HUMAN	10970810;9860493
cytochalasin d	SHC1_HUMAN	9642280;10330148;10976102;9774456;11406493
cytochalasin d	Q9UII7_HUMAN	9535896;9722621;12687012;12061792
rotenone	CLUS_HUMAN	12753929
rotenone	ODO2_HUMAN	15897899
rotenone	BCLX_HUMAN	8668329
rotenone	BLMH_HUMAN	3456345
rotenone	CAH9_HUMAN	11543648
rotenone	SYUA_HUMAN	11445065;14535945;11724769;15234983;12690660;14672949;14985429;15280438;12504863;14550906;12941575;12177198;11679584;12151787
mitomycins	NCOA6_HUMAN	11836674;14760156
mitomycins	ARLY_HUMAN	3159580;1254947
mitomycins	BLMH_HUMAN	3530137
mitomycins	A2MG_HUMAN	6413730;2991624
mitomycins	CAH9_HUMAN	3148824;2118977
mitomycins	APLP1_HUMAN	14760156
mitomycins	Q9UII7_HUMAN	14532995
amsacrine	LRP1_HUMAN	9378536
amsacrine	NEU2_HUMAN	8823806
amsacrine	P53_HUMAN	12082016
genistein	A4_HUMAN	9003386
genistein	LRP1_HUMAN	7542445
genistein	PSN2_HUMAN	11694625
genistein	CATB_HUMAN	9003386
genistein	ODO2_HUMAN	12130554;15947025
genistein	RAGE_HUMAN	11078691
genistein	CTNB1_HUMAN	12169098;10536056;8707857
genistein	SYUG_HUMAN	7722483
genistein	MOK_HUMAN	11078691
genistein	BCLX_HUMAN	10698527;10352242
genistein	5HT2C_HUMAN	11211111
genistein	A2MG_HUMAN	7542445
genistein	TRPM2_HUMAN	11331651
genistein	GRB2_HUMAN	15672868;10954125
genistein	SHC1_HUMAN	12210725;9660480;10329376;11007941;10954125;11170137;7568118;8567115
genistein	Q9UII7_HUMAN	12169098
hydrochlorothiazide	CLUS_HUMAN	3961263;6664829;7053414
vincristine	LRP1_HUMAN	10511592;11408938;10929770;10376971;10999723
vincristine	PSN1_HUMAN	9766801
vincristine	PSN2_HUMAN	8400321
vincristine	CLUS_HUMAN	16111588;10613314
vincristine	FLNB_HUMAN	8980397
vincristine	C1TC_HUMAN	12482398
vincristine	NEU2_HUMAN	6093979;2564628;2844393;8722343;8895198
vincristine	FLNA_HUMAN	12499399
vincristine	SYUG_HUMAN	8413926
vincristine	P53_HUMAN	9760067;10585266;12007564;11244509
vincristine	GLNA_HUMAN	8204521
vincristine	BCLX_HUMAN	15657349;8943066;14500373;8698136;9242554;11181049;15254727;15159020;10762632
vincristine	BCL2_HUMAN	9584191;11378579;15637137;10700860;15085385;11743658
vincristine	JIP1_HUMAN	2421645;12911737;14675356;11072168
vincristine	GFAP_HUMAN	3359311
vincristine	A2MG_HUMAN	10811664
vincristine	CAH9_HUMAN	8377652;8921503
vincristine	APLP1_HUMAN	11778974;16000127
vincristine	SHC1_HUMAN	6595975
vincristine	CCNB1_HUMAN	15576476
vincristine	CH60_HUMAN	10462506
acyclovir	NEU2_HUMAN	11676521
acyclovir	SYUG_HUMAN	3014203
acyclovir	GFAP_HUMAN	8583233
fluorescein-5-isothiocyanate	A4_HUMAN	11102736
fluorescein-5-isothiocyanate	PSN2_HUMAN	11236925
fluorescein-5-isothiocyanate	CATB_HUMAN	9050797;11102736
fluorescein-5-isothiocyanate	ARLY_HUMAN	9302108
fluorescein-5-isothiocyanate	PRIO_HUMAN	11739179
fluorescein-5-isothiocyanate	RAGE_HUMAN	10804393
fluorescein-5-isothiocyanate	SYUG_HUMAN	12967914
fluorescein-5-isothiocyanate	MOK_HUMAN	10804393
fluorescein-5-isothiocyanate	BCL2_HUMAN	12552588;10657650
fluorescein-5-isothiocyanate	GFAP_HUMAN	10536261;1982895
fluorescein-5-isothiocyanate	A2MG_HUMAN	9787474;8930375;9039696
fluorescein-5-isothiocyanate	CAH9_HUMAN	7690305
fluorescein-5-isothiocyanate	STX1A_HUMAN	15351981
fluorescein-5-isothiocyanate	AACT_HUMAN	14757230
fluorescein-5-isothiocyanate	APH1A_HUMAN	11813202
fluorescein-5-isothiocyanate	HCD2_HUMAN	15671538;2454266
adenosine	S100B_HUMAN	15464860
adenosine	CDK5_HUMAN	12181566;15317590
adenosine	ARLY_HUMAN	11063577;11063576;15924427;15210701
adenosine	RAGE_HUMAN	15547674;15748606
adenosine	MK10_HUMAN	10567720
adenosine	NEU2_HUMAN	1324608;999818;12492427
adenosine	FLNA_HUMAN	8088969;15731336;14581714
adenosine	SYUG_HUMAN	15891594
adenosine	MOK_HUMAN	15547674;15748606
adenosine	GLNA_HUMAN	7727369;9364448;11821727;2472384
adenosine	BCL2_HUMAN	11859924
adenosine	5HT2C_HUMAN	9153397;11070079;10092629;14713296
adenosine	JIP1_HUMAN	10581320;15025935;11412835;9786512;15147729;11125027;2990269;15246113;11396942;12600879;11522602;10974209
adenosine	APOE_HUMAN	8757959
adenosine	CAH9_HUMAN	10533957
adenosine	PEN2_HUMAN	8867918;1335055;7562600
adenosine	STX1A_HUMAN	12122056
adenosine	SYUA_HUMAN	15579163
adenosine	APH1A_HUMAN	9843909;8141324;1881056;15355791;1969237
adenosine	HCD2_HUMAN	10548146
adenosine	CH60_HUMAN	8576930
pentoxifylline	CLUS_HUMAN	7633988
pentoxifylline	P53_HUMAN	12456286;7712469
pentoxifylline	BCL2_HUMAN	11754643
pentoxifylline	A2MG_HUMAN	9791055
pentoxifylline	CAH9_HUMAN	8283049;15601679
pentoxifylline	APLP1_HUMAN	7803190
pentoxifylline	APH1A_HUMAN	11865833;11865834
pentoxifylline	Q9UII7_HUMAN	12888451
indocyanine green	CLUS_HUMAN	3147903
indocyanine green	NCOA6_HUMAN	10440613
indocyanine green	GLNA_HUMAN	814028
indocyanine green	HCD2_HUMAN	335350;3425869
diltiazem	CLUS_HUMAN	1488404
diltiazem	CATB_HUMAN	7538432
diltiazem	RAGE_HUMAN	10322933
diltiazem	NEU2_HUMAN	6423810;11845867
diltiazem	SYUG_HUMAN	8223943;8161715;2550449;6234179;1597846;7880983;2542806;8138907;2147036;1403813;10935896
diltiazem	GLNA_HUMAN	10231447
diltiazem	GFAP_HUMAN	10802029
diltiazem	APOE_HUMAN	2597113
diltiazem	CAH9_HUMAN	2273444
diltiazem	PEN2_HUMAN	2439174
diltiazem	AACT_HUMAN	10323641
cromakalim	SYUG_HUMAN	9831903
cromakalim	PEN2_HUMAN	7862839
amoxicillin	PRIO_HUMAN	11709304
amoxicillin	AACT_HUMAN	9354205
amoxicillin	OTC_HUMAN	10852395
thioguanine	GLNA_HUMAN	8457565
thioguanine	BLMH_HUMAN	2415503
1-methyl-3-isobutylxanthine	PSN2_HUMAN	12951045;1722871
1-methyl-3-isobutylxanthine	CLUS_HUMAN	6194697;7534982
1-methyl-3-isobutylxanthine	CDK5_HUMAN	12538871
1-methyl-3-isobutylxanthine	NCKP1_HUMAN	15226598
1-methyl-3-isobutylxanthine	ODO2_HUMAN	12072410;15748712;11867270;6177525;1722871
1-methyl-3-isobutylxanthine	NEU2_HUMAN	2433273;1694408;7689952;1717834
1-methyl-3-isobutylxanthine	GLNA_HUMAN	7523385
1-methyl-3-isobutylxanthine	GFAP_HUMAN	2465997
1-methyl-3-isobutylxanthine	APOE_HUMAN	8995232
1-methyl-3-isobutylxanthine	PEN2_HUMAN	7545269;2417870
1-methyl-3-isobutylxanthine	STX1A_HUMAN	15528199
1-methyl-3-isobutylxanthine	DLG4_HUMAN	11967229
1-methyl-3-isobutylxanthine	SHC1_HUMAN	10984296
chloroquine	A4_HUMAN	8152599;8562317;1417801;10217259;9874193;9084428;1549591;7602619;8738224;7794922
chloroquine	LRP1_HUMAN	2762297;9893120;8663244
chloroquine	CLUS_HUMAN	15122307;10474090;15736385
chloroquine	FLNB_HUMAN	12202157;11161284;9548476
chloroquine	CATB_HUMAN	8152599;1417801;10217259;9874193;9869322;9084428;1549591;1644790;7602619;8738224
chloroquine	PRIO_HUMAN	15122307
chloroquine	NEU2_HUMAN	8765464
chloroquine	TAU_HUMAN	9690670;9883858
chloroquine	SYUG_HUMAN	9812997
chloroquine	BCLX_HUMAN	14536059
chloroquine	BLMH_HUMAN	11286991;2265208
chloroquine	APOE_HUMAN	8473293;11123936
chloroquine	STXB1_HUMAN	3320962
chloroquine	SHC1_HUMAN	11370743;9468528
chloroquine	Q9UII7_HUMAN	10037790
chloroquine	CH60_HUMAN	8706327
prazosin	CLUS_HUMAN	1336524;3598910
prazosin	NEU2_HUMAN	6323526;6149967;9755089;1469631;1758576;2360676
prazosin	SYUG_HUMAN	11233385
prazosin	P53_HUMAN	1647768
prazosin	BLMH_HUMAN	2245422
prazosin	5HT2C_HUMAN	12753409;8862488;7969778;14752059;11596864;10924930;15118345;9023289
prazosin	A2MG_HUMAN	6087962
prazosin	PEN2_HUMAN	9819144
prazosin	SYUA_HUMAN	12390524
prazosin	AACT_HUMAN	6152830
prazosin	CSEN_HUMAN	12143911
calcimycin	A4_HUMAN	7775475;11278299;8382716;3006048;2849436;2172016;11406297;8663438;10521604;10873581;8835781
calcimycin	PSN1_HUMAN	9461055;16061495;10587643;11599009
calcimycin	PSN2_HUMAN	16061495
calcimycin	CLUS_HUMAN	7989511
calcimycin	CDK5_HUMAN	12419309;10629766;11403952
calcimycin	FLNB_HUMAN	2894252;2842394
calcimycin	CATB_HUMAN	11278299;11406297;10521604;10873581;8835781;11223918;8395841;8161510
calcimycin	ARLY_HUMAN	3931694
calcimycin	ODO2_HUMAN	3121931
calcimycin	NEU2_HUMAN	6423810;10715561;3019160
calcimycin	TAU_HUMAN	7616252;1354011;8627310
calcimycin	FLNA_HUMAN	10833414
calcimycin	SYUG_HUMAN	10958341;6151994;6767784;2137685;2523376;6809801;41240;91403;31288;11872166;6801255;376731
calcimycin	BCLX_HUMAN	10383145;8700549
calcimycin	BCL2_HUMAN	15469999
calcimycin	BLMH_HUMAN	1380557;10749876
calcimycin	GFAP_HUMAN	10802029
calcimycin	APOE_HUMAN	9409199
calcimycin	CAH9_HUMAN	10704262;8910251
calcimycin	PEN2_HUMAN	2552070
calcimycin	STX1A_HUMAN	10632578;10800941
calcimycin	DLG4_HUMAN	11967229
calcimycin	STXB1_HUMAN	1417726
bendroflumethiazide	CLUS_HUMAN	2721120
bendroflumethiazide	AACT_HUMAN	2692687
theophylline	LRP1_HUMAN	10854570
theophylline	CLUS_HUMAN	1359072;1979626;1692192
theophylline	CATB_HUMAN	12948017
theophylline	ARLY_HUMAN	188416;3328726
theophylline	ODO2_HUMAN	15748712
theophylline	GLNA_HUMAN	6102999;2908559
theophylline	BCL2_HUMAN	15313391
theophylline	GFAP_HUMAN	14754894
theophylline	PEN2_HUMAN	1335055
theophylline	SYUA_HUMAN	15579163
theophylline	AACT_HUMAN	15699783;11293649;6463066;12917905;8170185
theophylline	APH1A_HUMAN	8141324
indomethacin	A4_HUMAN	11278299;1652124;7733976
indomethacin	LRP1_HUMAN	11469885
indomethacin	PSN2_HUMAN	9713341
indomethacin	CLUS_HUMAN	2589488;81495;6844731
indomethacin	CATB_HUMAN	11278299;1652124;7695605;7733976
indomethacin	ODO2_HUMAN	8983969;1501767
indomethacin	CTNB1_HUMAN	15248904;11313997;11756231;12813129
indomethacin	NEU2_HUMAN	7460817;6962466;2547832;3998146;3457670;11142338;2705533;1722410;3007904;2579905;8144825;15256272
indomethacin	SYUG_HUMAN	6203364;6155680
indomethacin	P53_HUMAN	7930673
indomethacin	BCLX_HUMAN	11062132
indomethacin	BLMH_HUMAN	12130725;11053217
indomethacin	5HT2C_HUMAN	10748274;10924930;8863849
indomethacin	JIP1_HUMAN	2421645;11686327;8743195
indomethacin	A2MG_HUMAN	10679578
indomethacin	APOE_HUMAN	10567380
indomethacin	CAH9_HUMAN	6540107;9083007
indomethacin	APLP1_HUMAN	15501962;8273577
indomethacin	APH1A_HUMAN	6645205;2968365;6366954;1375765;6577583;2593488
indomethacin	HCD2_HUMAN	2454266
indomethacin	CH60_HUMAN	10203577
azathioprine	FLNA_HUMAN	387573
azathioprine	CAH9_HUMAN	1371826
dactinomycin	A4_HUMAN	9932109;8815214
dactinomycin	LRP1_HUMAN	11408938;10929770
dactinomycin	FHL2_HUMAN	11161712
dactinomycin	PSN2_HUMAN	8354273;2731170;7957194;7068769;7951069;2142598;2604863
dactinomycin	NP1L1_HUMAN	11707452;10780924;95408
dactinomycin	CDK5_HUMAN	8649771
dactinomycin	FLNB_HUMAN	14735146;12438613
dactinomycin	CATB_HUMAN	9932109;15075251
dactinomycin	ARLY_HUMAN	632299;8387274;3328726;8534787;6816698;23286;9395312
dactinomycin	ODO2_HUMAN	213269;2552726;9449243;9002661
dactinomycin	RAGE_HUMAN	15158469
dactinomycin	CTNB1_HUMAN	10330189
dactinomycin	NEU2_HUMAN	8751289
dactinomycin	TAU_HUMAN	9260742
dactinomycin	SYUG_HUMAN	10679110
dactinomycin	MOK_HUMAN	15158469
dactinomycin	P53_HUMAN	7556087;10998350;9681825;9664074;15280377
dactinomycin	GLNA_HUMAN	6194421;8772537;6121820;1978838;17616;14046
dactinomycin	BCLX_HUMAN	9326359;9842900;12680254;10200572
dactinomycin	BCL2_HUMAN	10328866;8702992
dactinomycin	BLMH_HUMAN	170966
dactinomycin	UB2D2_HUMAN	15280377
dactinomycin	GFAP_HUMAN	1720762
dactinomycin	A2MG_HUMAN	2483850;13129682;11583915
dactinomycin	APOE_HUMAN	10488140
dactinomycin	CAH9_HUMAN	1850207;15118344;8023955;2345139;9324066
dactinomycin	PEN2_HUMAN	9359460
dactinomycin	STX1A_HUMAN	9447946
dactinomycin	TIP60_HUMAN	15310756
dactinomycin	SYUA_HUMAN	15110760
dactinomycin	AACT_HUMAN	1381705;765885;7678503;279296;1734954;8621260;10880392;9880403;8743637;6255788;2161998;6948584;12430140;3524816;77730;6690624;2947961;11960193;3819510;6205624;3819512;15111130;11208352;6461566;6175616;1934597;8069459;14988393;12740176;12968063;12160958;6262437;6174214
dactinomycin	APH1A_HUMAN	15758027;11514619;2380175;11161712
dactinomycin	GRB2_HUMAN	10403397
dactinomycin	SHC1_HUMAN	9873474;10403397;9312048;15964235
dactinomycin	Q9UII7_HUMAN	15194219
dactinomycin	OTC_HUMAN	6206861;224956;2998495;3925950
dactinomycin	CH60_HUMAN	8103523
puromycin	A4_HUMAN	14706550
puromycin	NP1L1_HUMAN	95408
puromycin	CATB_HUMAN	14706550
puromycin	ARLY_HUMAN	632299;8387274;8534787;9395312
puromycin	ODO2_HUMAN	2552726
puromycin	FLNA_HUMAN	14660646
puromycin	P53_HUMAN	9154813
puromycin	A2MG_HUMAN	2483850
puromycin	AACT_HUMAN	6461566
vitamin e	A4_HUMAN	10934205
vitamin e	PSN1_HUMAN	1339060;8741599
vitamin e	PSN2_HUMAN	15203194
vitamin e	CLUS_HUMAN	12002639
vitamin e	FLNB_HUMAN	11444841
vitamin e	CATB_HUMAN	10934205;15221339
vitamin e	ARLY_HUMAN	1680252
vitamin e	ODO2_HUMAN	9118503;10323669
vitamin e	RAGE_HUMAN	8550841;9530244;15749380
vitamin e	MOK_HUMAN	8550841;9530244;15749380
vitamin e	BCLX_HUMAN	11316580
vitamin e	BCL2_HUMAN	15753136;11444866
vitamin e	BLMH_HUMAN	8960150;9101039
vitamin e	GFAP_HUMAN	12591097
vitamin e	A2MG_HUMAN	1382381
vitamin e	APOE_HUMAN	8081360
vitamin e	CAH9_HUMAN	8558311;1283689;3952776
vitamin e	APLP1_HUMAN	15691027;9796422;9435466;9808643
vitamin e	STXB1_HUMAN	15519655
vitamin e	GRB2_HUMAN	9603353
apomorphine	FLNB_HUMAN	4060556
apomorphine	ODO2_HUMAN	3945627;3796794
apomorphine	RAGE_HUMAN	909599
apomorphine	NEU2_HUMAN	9755089
apomorphine	SYUG_HUMAN	8397341
apomorphine	MOK_HUMAN	909599
apomorphine	BLMH_HUMAN	2320636;3702600
apomorphine	5HT2C_HUMAN	12325040;7768299;9680252
apomorphine	APOE_HUMAN	14665980;12409976;7480542;2789282;15639188;3699091;10592384;15219657;10663426;11000443;1523260;12742253
apomorphine	PEN2_HUMAN	8750728;7904071;1311454
apomorphine	SYUA_HUMAN	15655262;1448483
apomorphine	AACT_HUMAN	11850736;220844
apomorphine	APH1B_HUMAN	15721236
pirenzepine	BLMH_HUMAN	7616446
pirenzepine	5HT2C_HUMAN	10227113;11205431;12021829;12131601;10704958;12454564;11763004;12372221
pirenzepine	CH60_HUMAN	12935560
acridine orange	BCLX_HUMAN	12646553
acridine orange	APOE_HUMAN	14511323
acridine orange	CH60_HUMAN	10949144
folic acid	NCOA6_HUMAN	11890409
folic acid	C1TC_HUMAN	1001792;5456151;6351555;6996564;9327028;1390656;6601493;13907491;6607769;1108614;9663401;11320527;5059116;1186901;3124003;5928207;11048629;10024094;11468972;9174561;12441636;9740165;12486865;11788454;15861780;15588157;15797993;11371182;15166809;6033708;14490085;5928208;9765352;195727;10720158;8645712;12061812;3091098;14489619;447824;9380637;11252530;334546;508720;13907490;5578916;6972186;917613;5…
folic acid	RAGE_HUMAN	3930852
folic acid	MOK_HUMAN	3930852
folic acid	BCLX_HUMAN	10720950
folic acid	BCL2_HUMAN	10720950
folic acid	BLMH_HUMAN	15867155
folic acid	CAH9_HUMAN	12051400
folic acid	APH1A_HUMAN	11269946;11270118;7612966;11339832
folic acid	OTC_HUMAN	6623463
chlorpromazine	LRP1_HUMAN	10877826
chlorpromazine	S100B_HUMAN	8401299;6947252
chlorpromazine	FLNB_HUMAN	4060556
chlorpromazine	PRIO_HUMAN	11994310
chlorpromazine	RAGE_HUMAN	1182307;6486276;1021547;1017765;572124
chlorpromazine	NEU2_HUMAN	3714529
chlorpromazine	MOK_HUMAN	1182307;6486276;1021547;1017765;572124
chlorpromazine	GLNA_HUMAN	12414970
chlorpromazine	5HT2C_HUMAN	8597525;9379848;15363976
chlorpromazine	S10A1_HUMAN	8401299
staurosporine	A4_HUMAN	9496375;1411529;8100450;8835781;12960154
staurosporine	LRP1_HUMAN	10964450
staurosporine	PSN1_HUMAN	9852041;11570818;10582585;12210846;9219695;10521466
staurosporine	PSN2_HUMAN	11278424;9219695;12556443;11752057
staurosporine	CLUS_HUMAN	9316497
staurosporine	NP1L1_HUMAN	10807909;10672898
staurosporine	CDK5_HUMAN	12852832;8626584;10495356;15339383;8726973;11013232
staurosporine	CATB_HUMAN	9496375;15341520;1411529;8100450;8835781;12960154
staurosporine	ODO2_HUMAN	2256499
staurosporine	CTNB1_HUMAN	9852041;8754749
staurosporine	MK10_HUMAN	11327694
staurosporine	SNCAP_HUMAN	12761037
staurosporine	NEU2_HUMAN	2705533;11253165
staurosporine	TAU_HUMAN	15475565;10620503;7593325;12427828;10537042
staurosporine	FLNA_HUMAN	11050075;11909861
staurosporine	P53_HUMAN	9484835
staurosporine	GLNA_HUMAN	1637317
staurosporine	BCLX_HUMAN	14752512;9053837;11825888;8941712;15300197;10098499;10702275;15369775;9141489;12176039;11431734;9604385;9754799;10200477
staurosporine	BCL2_HUMAN	11158204;11053666;7929424;9738012;10677502;14748742;12556443;15210690;11309196;12421819;11830549;12172977
staurosporine	5HT2C_HUMAN	9014152
staurosporine	GFAP_HUMAN	1720762
staurosporine	CAH9_HUMAN	9352308
staurosporine	PEN2_HUMAN	9712694
staurosporine	SPB13_HUMAN	15528961
staurosporine	SYUA_HUMAN	12062470;15009645;10818098
staurosporine	STXB1_HUMAN	1848559;10651895;9022678;11752058;8280102;8391810;8726973
staurosporine	CSEN_HUMAN	11278424
staurosporine	GRB2_HUMAN	15341520
staurosporine	SHC1_HUMAN	15341520
staurosporine	CH60_HUMAN	10744629
trifluoperazine	LRP1_HUMAN	15226301
trifluoperazine	S100B_HUMAN	8401299;2765555;2386612;2736040;2271488
trifluoperazine	RAGE_HUMAN	1182307;857474
trifluoperazine	NEU2_HUMAN	6423810
trifluoperazine	SYUG_HUMAN	3025274
trifluoperazine	MOK_HUMAN	1182307;857474
trifluoperazine	BLMH_HUMAN	9342597
trifluoperazine	S10A1_HUMAN	8401299;2765555;2386612;2271488
trifluoperazine	A2MG_HUMAN	15226301
trifluoperazine	APLP1_HUMAN	1634144
trifluoperazine	STXB1_HUMAN	1911746
hymecromone	LRP1_HUMAN	15178567
hymecromone	APOE_HUMAN	9888791
hymecromone	Q9UII7_HUMAN	8313373
azure stains	TAU_HUMAN	15611092
azure stains	MOK_HUMAN	9096695
azure stains	CAH9_HUMAN	10209337;8377652
azure stains	STXB1_HUMAN	9870366
fluorescein	A4_HUMAN	11102736
fluorescein	S100B_HUMAN	15781852
fluorescein	CLUS_HUMAN	10378819
fluorescein	FLNB_HUMAN	10600378
fluorescein	CATB_HUMAN	12948017;11102736
fluorescein	ODO2_HUMAN	3262602;3698917
fluorescein	PRIO_HUMAN	12759373
fluorescein	GFAP_HUMAN	8907324
fluorescein	STX1A_HUMAN	14676208
fluorescein	AACT_HUMAN	3498766
fluorescein	APH1A_HUMAN	10388780
yohimbine	ARLY_HUMAN	6138269
yohimbine	NEU2_HUMAN	6323526;6149967
yohimbine	GLNA_HUMAN	1322406
yohimbine	5HT2C_HUMAN	14684253;9202339;8709108
yohimbine	A2MG_HUMAN	6148249;6087962;2982049;3007177;3004991
yohimbine	PEN2_HUMAN	3031283;1847196
yohimbine	SKIL_HUMAN	10381767
quinpirole	NEU2_HUMAN	1350111
quinpirole	5HT2C_HUMAN	9582253;8773443
quinpirole	PEN2_HUMAN	2166675;3018189;1603903;7838928
diazepam	FLNB_HUMAN	11166289;8670001
diazepam	RAGE_HUMAN	945087;3865559;1182307;1021547;1164858;535829;235008;1017765;6632385;572124;1033112;857474
diazepam	FLNA_HUMAN	2054732;14581714
diazepam	SYUG_HUMAN	3028557;3095540;3022866
diazepam	MOK_HUMAN	945087;3865559;1182307;1021547;1164858;535829;235008;1017765;6632385;572124;1033112;857474
diazepam	5HT2C_HUMAN	10487536;7617805;8587903;15866558;14659583;11888553;11489455
diazepam	CAH9_HUMAN	7854141
diazepam	DLG4_HUMAN	12591944
diazepam	AACT_HUMAN	1696606;6139491;2568350
diazepam	STXB1_HUMAN	11015034
diazepam	CSEN_HUMAN	987727;760587;12911367
saxitoxin	APLP1_HUMAN	12238151
saxitoxin	PEN2_HUMAN	10499375;2844101;1851839
desipramine	5HT2C_HUMAN	15866558;7760981;9920211;15617725
desipramine	A2MG_HUMAN	6143674
desipramine	PEN2_HUMAN	8156397
fluoresceins	A4_HUMAN	11602674
fluoresceins	LRP1_HUMAN	10404077;10764626
fluoresceins	PSN1_HUMAN	9214313
fluoresceins	S100B_HUMAN	11108963
fluoresceins	CLUS_HUMAN	11483633;1742343
fluoresceins	CATB_HUMAN	11602674
fluoresceins	ARLY_HUMAN	11331352;11160155;11600413
fluoresceins	C1TC_HUMAN	6979975
fluoresceins	ODO2_HUMAN	10194380;3262602;3698917
fluoresceins	PRIO_HUMAN	15093684
fluoresceins	GLNA_HUMAN	15777955
fluoresceins	BCL2_HUMAN	8665496
fluoresceins	BLMH_HUMAN	12475238
fluoresceins	S10A1_HUMAN	11108963
fluoresceins	UB2D2_HUMAN	11195973
fluoresceins	GFAP_HUMAN	8907324;1828780;1982895
fluoresceins	A2MG_HUMAN	2681226
fluoresceins	APOE_HUMAN	2450589
fluoresceins	CAH9_HUMAN	8953724;12224756
fluoresceins	SYUA_HUMAN	11004584
fluoresceins	AACT_HUMAN	3498766
fluoresceins	HCD2_HUMAN	2454266;2506277
ficusin	SYUG_HUMAN	7958927
clomipramine	CLUS_HUMAN	11454417;2325942;11897263;7973312;2325944;11902426;14575892;9187315;3887445;11006441;8743636
clomipramine	BCLX_HUMAN	11230808
clomipramine	5HT2C_HUMAN	7760981;11358463;15477361;14501155
caffeine	PSN1_HUMAN	15009636;10764737
caffeine	S100B_HUMAN	10837142
caffeine	CDK5_HUMAN	12181566
caffeine	CATB_HUMAN	8161510
caffeine	ARLY_HUMAN	570169
caffeine	NCKP1_HUMAN	7701208;14652086
caffeine	PRIO_HUMAN	10987828
caffeine	RAGE_HUMAN	1237413
caffeine	TAU_HUMAN	15385569
caffeine	SYUG_HUMAN	1533181;10958341;1887912;11463625;10332094;12531782;2427691;9883281;2556441;10620297;2321964;15010488;8368355;12111244;9729620;12730349;9817798;3501718;10457093;2785769;15486014;11790813;9679169;10601161;9284267;9074695;1716686;2424370;10860770;2751121;8368363;8782101;9038895;8683457;11705776;15277920;9145907;1403813;7612843;9843899;7982263;7277891;16122794;9990541;8358539;9113183
caffeine	MOK_HUMAN	1237413
caffeine	P53_HUMAN	8692199;8968086
caffeine	BCL2_HUMAN	10360785;12792986
caffeine	BLMH_HUMAN	11087041;8788536
caffeine	5HT2C_HUMAN	14684253
caffeine	S10A1_HUMAN	12721284;11156445
caffeine	PEN2_HUMAN	7562600
caffeine	AACT_HUMAN	856939
caffeine	CSEN_HUMAN	15086516;12676525;12198160
caffeine	OTC_HUMAN	8792941;10998890;2864307;11144150;7831424
chlordiazepoxide	RAGE_HUMAN	945087;1182307;235008;857474
chlordiazepoxide	MOK_HUMAN	945087;1182307;235008;857474
chlordiazepoxide	5HT2C_HUMAN	7617805;8587903;9886683
mianserin	5HT2C_HUMAN	10762339;7798914;9282925;10867975;14615872;8748048;15673664;15018375;10219979;8862488;10549818;15138762;11082448;7673653;12208562;12420151;15363976;11271412;7813563;9920211;8798428;9282936;11004734;10501219;7624049;8780834;11961084;15963493;7909313;11113535
indapamide	SYUG_HUMAN	8572850
flumazenil	SYUG_HUMAN	3028557;3095540
flumazenil	5HT2C_HUMAN	15163561
vinca alkaloids	NEU2_HUMAN	8646677;12044859
tetrahydrofolates	PSN1_HUMAN	16040194
tetrahydrofolates	C1TC_HUMAN	124265;1001792;7061514;9454603;6601493;785140;476523;666851;10828945;4405422;7039410;1275513;12486865;3335280;562190;5016638;4154976;9067281;195727;1160508;4809524;682069;6966369;9250969;6966370;6988563;737266;7350916;9250981;9250979;1143004;4153026;5016643;10386884;6987225;11169015;7834626;6967110;9250982;328341;7548019;30404;1243674;5150147;350870;166989;15349715;659361;838698;1099450;22555;365…
tetrahydrofolates	BLMH_HUMAN	10850963;15867155
citalopram	A4_HUMAN	15955598
citalopram	S100B_HUMAN	15316717
citalopram	CATB_HUMAN	15955598
citalopram	BCLX_HUMAN	11230808
citalopram	5HT2C_HUMAN	10762339;8840350;10727723;15970314;14769389;10229070;8876023;15388280;9756397;10727716;11271412;15749456;8528581;12232544;12087877
citalopram	APLP1_HUMAN	16086615
vinblastine	LRP1_HUMAN	15301725;11004683
vinblastine	NP1L1_HUMAN	95408
vinblastine	NCOA6_HUMAN	11836674;14760156
vinblastine	SNCAP_HUMAN	14627698
vinblastine	NEU2_HUMAN	2879622
vinblastine	TAU_HUMAN	6436239
vinblastine	FLNA_HUMAN	10509165
vinblastine	P53_HUMAN	12221076
vinblastine	GLNA_HUMAN	8204521
vinblastine	BCLX_HUMAN	14500373;11857026
vinblastine	BCL2_HUMAN	9771965;10196170;10777489
vinblastine	JIP1_HUMAN	10913135;11072168
vinblastine	CAH9_HUMAN	8544755;1371826;7854141;8377652;8921503;8133786
vinblastine	APLP1_HUMAN	9890172;7973770;14698542;16192578;12506167;14760156
vinblastine	SYUA_HUMAN	14627698
vinblastine	CH60_HUMAN	10462506
amoxicillin-potassium clavulanate combination	APH1A_HUMAN	12353338
bicuculline	PSN1_HUMAN	10654583;15548218;8556327
bicuculline	PSN2_HUMAN	10654583;8556327;8608796;8574768;9401779
bicuculline	CDK5_HUMAN	15483119
bicuculline	RAGE_HUMAN	9507168;15893628
bicuculline	NEU2_HUMAN	3995365;12732257
bicuculline	APLP2_HUMAN	3021772
bicuculline	SYUG_HUMAN	3040438;2435350
bicuculline	MOK_HUMAN	9507168;15893628
bicuculline	5HT2C_HUMAN	10227084
bicuculline	PEN2_HUMAN	10366614;1360320
carbamazepine	PSN1_HUMAN	10987984
carbamazepine	RAGE_HUMAN	1526189;3525749;6150230;6123658;995826;2136070;3290939;4055711;6718656
carbamazepine	NEU2_HUMAN	6619270
carbamazepine	FLNA_HUMAN	3191893
carbamazepine	MOK_HUMAN	1526189;3525749;6150230;6123658;995826;2136070;3290939;4055711;6718656
clonazepam	PSN1_HUMAN	10987984
clonazepam	FLNA_HUMAN	2054732
clonazepam	BLMH_HUMAN	6510447
clonazepam	5HT2C_HUMAN	9933146
clonazepam	CAH9_HUMAN	7870280
clonazepam	AACT_HUMAN	3619710
clonazepam	CSEN_HUMAN	3820495
strychnine	SYUG_HUMAN	3040438
strychnine	CAH9_HUMAN	1206807
penicillin g	BLMH_HUMAN	7830303
penicillin g	AACT_HUMAN	7535500
penicillin g	OTC_HUMAN	2704059;2924580
flunitrazepam	PSN1_HUMAN	10671322
flunitrazepam	FLNA_HUMAN	2889235;2887249;2161962;2054732;7603620
flunitrazepam	SYUG_HUMAN	3028557
flunitrazepam	CSEN_HUMAN	18334;12487
melatonin	A4_HUMAN	15298672
melatonin	S100B_HUMAN	14583344;15899254
melatonin	CATB_HUMAN	15298672;10231726
melatonin	NCKP1_HUMAN	15345736
melatonin	ODO2_HUMAN	11444108;9771472
melatonin	NEU2_HUMAN	1829510
melatonin	TAU_HUMAN	15230863;9927303
melatonin	SYUG_HUMAN	1606314;6616566
melatonin	BLMH_HUMAN	10198388
melatonin	5HT2C_HUMAN	15289999;12904965;9739147;12232545;12750432;10529449;10727629;11282356;7558717;10991989;12177586
melatonin	GFAP_HUMAN	14583344;15899254
melatonin	A2MG_HUMAN	11840685
melatonin	CSEN_HUMAN	15190107;15683138
melatonin	CH60_HUMAN	16204768
tubocurarine	AACT_HUMAN	9296397
tubocurarine	CSEN_HUMAN	3190825
quipazine	5HT2C_HUMAN	11103883;11564657;7714755;7473132;15380867;9658194;8931486;8891601;8748393;11804612;12152119;11113535
tetrodotoxin	A4_HUMAN	8506366
tetrodotoxin	CDK5_HUMAN	11893918
tetrodotoxin	CATB_HUMAN	8506366
tetrodotoxin	CTNB1_HUMAN	14528308
tetrodotoxin	MK10_HUMAN	10950813
tetrodotoxin	NEU2_HUMAN	11606471;12399408
tetrodotoxin	TAU_HUMAN	3488538
tetrodotoxin	BLMH_HUMAN	2240227;8236019
tetrodotoxin	5HT2C_HUMAN	8764207;10654584;9446695;11166327;10211591
tetrodotoxin	GFAP_HUMAN	8328294;12949902;15652984;16116450
tetrodotoxin	CAH9_HUMAN	1018229;9721906
tetrodotoxin	APLP1_HUMAN	11180932
tetrodotoxin	PEN2_HUMAN	10366614;3019263;1976420;1976759;10198826
tetrodotoxin	SYUA_HUMAN	15579163
tetrodotoxin	GRB2_HUMAN	2903879
omeprazole	PSN2_HUMAN	11903739
omeprazole	FLNB_HUMAN	9489907
omeprazole	GLNA_HUMAN	10720166
omeprazole	AACT_HUMAN	9354205
omeprazole	OTC_HUMAN	15369428;15811162;15017628;11121913
norfloxacin	STX1A_HUMAN	15007877
norfloxacin	STXB1_HUMAN	11818446
flurazepam	AACT_HUMAN	6139491
ciprofloxacin	CATB_HUMAN	11907176
ciprofloxacin	PRIO_HUMAN	9484868
ciprofloxacin	STX1A_HUMAN	15557626;12775697
didanosine	CATK_HUMAN	1378099
piperacillin	CLUS_HUMAN	15484223
thioinosine	NEU2_HUMAN	2545335
thioinosine	STX1A_HUMAN	11920296;11824478
mitomycin	PSN2_HUMAN	11857040;11405176
mitomycin	ARLY_HUMAN	3159580
mitomycin	P53_HUMAN	10751606;11423347;9333015;10362351
mitomycin	BCLX_HUMAN	15120327
mitomycin	BCL2_HUMAN	8476431
mitomycin	JIP1_HUMAN	15162828;9740697
mitomycin	A2MG_HUMAN	6413730;2991624
mitomycin	CAH9_HUMAN	8544755;15215326;3148824;1371826;12113765;15199132;1363157;8950349;11076996;2118977;11230557;11598943;8133786;1551087;9015136
mitomycin	APLP1_HUMAN	10408404;11782042;14698542;15642426;10765092
mitomycin	STX1A_HUMAN	12010491;12571029;12860453
mitomycin	AACT_HUMAN	9403028
ampicillin	BLMH_HUMAN	7830303
ampicillin	STX1A_HUMAN	15007877
ampicillin	CH60_HUMAN	15222981
ticarcillin	APBA1_HUMAN	9732143
nedocromil	ARLY_HUMAN	8939188
leucovorin	C1TC_HUMAN	9454603;6601493;14962716;12793858;11509801;9061796;6967110;7548019;8961940;9030524;1080553;8806778;8304211;4583678
leucovorin	FLNA_HUMAN	10509165
leucovorin	P53_HUMAN	11802206
leucovorin	BCL2_HUMAN	10700860;15085385;11743658
leucovorin	APLP1_HUMAN	10721170;8879373;7973770;11778974;15718320;11001391;10230255
leucovorin	Q9UII7_HUMAN	15361706
novobiocin	NEU2_HUMAN	11038146;1334054;11216669;8106148
chlorisondamine	NEU2_HUMAN	2737730
alprazolam	RAGE_HUMAN	2335496
alprazolam	NEU2_HUMAN	12035937;8027217;15717651
alprazolam	SYUG_HUMAN	2754023
alprazolam	MOK_HUMAN	2335496
alprazolam	5HT2C_HUMAN	8539344
domperidone	NEU2_HUMAN	9755089;3774591
quinacrine	CATB_HUMAN	7644542
quinacrine	ARLY_HUMAN	9233683;8512934
quinacrine	PRIO_HUMAN	12196138
quinacrine	NEU2_HUMAN	2249891
quinacrine	STX1A_HUMAN	15528199
quinacrine	STXB1_HUMAN	8280102
quinacrine	SHC1_HUMAN	9636164
papaverine	NEU2_HUMAN	2524587
papaverine	GLNA_HUMAN	1614275
papaverine	APOE_HUMAN	10198381
papaverine	HCD2_HUMAN	1772671
physostigmine	A4_HUMAN	8835781;8378353;9191090
physostigmine	CATB_HUMAN	9329715;8624119;8835781;7605915;8378353;9191090
physostigmine	PRIO_HUMAN	2095033
physostigmine	RAGE_HUMAN	3865559;6186219
physostigmine	NEU2_HUMAN	10192824;10643873
physostigmine	MOK_HUMAN	3865559;6186219
physostigmine	BLMH_HUMAN	3615551
physostigmine	PEN2_HUMAN	2852536;1647849;1974711;8013552
physostigmine	CSEN_HUMAN	211984
dideoxyadenosine	ODO2_HUMAN	8834407
dideoxyadenosine	NEU2_HUMAN	2221046
quinidine	CLUS_HUMAN	1359072;1979626;1359090
quinidine	NEU2_HUMAN	1381780
quinidine	BLMH_HUMAN	3229354;9863152
quinidine	AACT_HUMAN	773392;6486521
amiodarone	SYUG_HUMAN	8640331;12479281
amiodarone	S10A1_HUMAN	15581350
clozapine	CATB_HUMAN	16167458
clozapine	5HT2C_HUMAN	10832610;12480466;8742444;8597525;12325040;8783268;9551765;7898773;11888552;15741483;7961573;10227084;9379848;11750183;12668355;15562297;14687870;9629566;11430898;11070178;7851496;15635667;9258998;11603885;15318026;8773443;9824467;12480467;9885960;8649203;9223092;8930967
clozapine	DLG4_HUMAN	11169168
clozapine	HCD2_HUMAN	7997102
pimozide	HCD2_HUMAN	8417161
puromycin aminonucleoside	APOE_HUMAN	8506949;8412754;8413767
thioridazine	BLMH_HUMAN	2320636;3702600
promethazine	BLMH_HUMAN	8424471
ondansetron	5HT2C_HUMAN	8748393;8738578;10051134
ondansetron	APLP1_HUMAN	9093728;8879372
coumarins	PSN1_HUMAN	9886077
coumarins	PRIO_HUMAN	12853709
coumarins	CTNB1_HUMAN	16012713
coumarins	BCLX_HUMAN	9771973;9894607
coumarins	A2MG_HUMAN	11437605
coumarins	APLP1_HUMAN	15339222
coumarins	AACT_HUMAN	504972
coumarins	SKIL_HUMAN	14975759
cytokinins	LRP1_HUMAN	15940868
cytokinins	PSN1_HUMAN	15535127
cytokinins	APBA1_HUMAN	11042961
cytokinins	MOK_HUMAN	15728338;9874810;12644686;11331778;10364407
cytokinins	STXB1_HUMAN	15618425
rhodamines	LRP1_HUMAN	9029025
rhodamines	PSN1_HUMAN	4041444
rhodamines	ARLY_HUMAN	11331352
rhodamines	MK10_HUMAN	14599357
rhodamines	BCLX_HUMAN	11857368;12932437
rhodamines	BCL2_HUMAN	14510186
rhodamines	GFAP_HUMAN	8907324
rhodamines	PEN2_HUMAN	9342665
rhodamines	STXB1_HUMAN	12589359
rhodamines	APH1A_HUMAN	10388780;14677137
rhodamines	OTC_HUMAN	6545081
ethidium	CLUS_HUMAN	167997
ethidium	ARLY_HUMAN	8512934
ethidium	ODO2_HUMAN	15897899
ethidium	BLMH_HUMAN	3744904;15044190
ethidium	GFAP_HUMAN	14513173
ethidium	APOE_HUMAN	11983081
ethidium	STXB1_HUMAN	11532901
ethidium	APH1A_HUMAN	15178275
nocodazole	A4_HUMAN	7706247
nocodazole	PIN1_HUMAN	11118482;11774038
nocodazole	CDK5_HUMAN	12154070;9756618
nocodazole	CATB_HUMAN	7706247
nocodazole	ARLY_HUMAN	8944717
nocodazole	NCKP1_HUMAN	11817649
nocodazole	SNCAP_HUMAN	14627698
nocodazole	TAU_HUMAN	10232926;8056843;8621419;9786973;9666118;8809831;10820221;8324832;10685605
nocodazole	FLNA_HUMAN	14660646
nocodazole	SYUG_HUMAN	14576821
nocodazole	P53_HUMAN	12221076;7954409;12742155;9840938
nocodazole	BCLX_HUMAN	12115434
nocodazole	BCL2_HUMAN	9584191;11320150;10360785;9563469;10777489
nocodazole	APLP1_HUMAN	15262990
nocodazole	SYUA_HUMAN	14627698
nocodazole	SHC1_HUMAN	10330148;9950219
nocodazole	Q9UII7_HUMAN	12953069
nalidixic acid	HCD2_HUMAN	6995316
oxolinic acid	OTC_HUMAN	9449567;15081752;10852395;15276333;14980459;12092414
proflavine	GLNA_HUMAN	14046
cladribine	P53_HUMAN	12473386
cladribine	BCL2_HUMAN	15802533
vidarabine	P53_HUMAN	10812007
vidarabine	BCLX_HUMAN	14623330
vidarabine	BCL2_HUMAN	14687023;15802533
droperidol	CSEN_HUMAN	10358788
ganciclovir	PSN2_HUMAN	12208748
ganciclovir	BCL2_HUMAN	8665496
ganciclovir	GFAP_HUMAN	12684469;15494728
oxacillin	PRIO_HUMAN	9484868;1797461
propidium	LRP1_HUMAN	14709322
propidium	BCLX_HUMAN	10620799
propidium	BCL2_HUMAN	12099550
propidium	CAH9_HUMAN	8625953;7507215
propidium	OTC_HUMAN	12849727
ketanserin	A4_HUMAN	12231467
ketanserin	CATB_HUMAN	12231467
ketanserin	SYUG_HUMAN	8470049;8276825;8277817
ketanserin	BLMH_HUMAN	12909333
ketanserin	5HT2C_HUMAN	9165122;7798914;9282925;15109520;9739147;8700116;12644293;11861331;8783268;8526967;8587903;10748274;10989266;10972964;12052193;11567652;12708517;9622445;12563544;12097814;15135976;7984285;10698013;9689464;7996545;11734181;9178521;15908091;7473132;10512006;12231467;10768039;7620898;12122486;15138437;9473601;10216181;9262338;11717232;15913602;9832390;8798428;10654584;14752059;8931486;11596864;87483…
ketanserin	HCD2_HUMAN	1359617;2520957
ketanserin	CH60_HUMAN	12935560
atracurium	AACT_HUMAN	9296397
atracurium	CSEN_HUMAN	3414918
eosine yellowish-(ys)	CLUS_HUMAN	8952471
eosine yellowish-(ys)	CAH9_HUMAN	8544755
eosine yellowish-(ys)	SYUA_HUMAN	11744621;11457435;11004584
4-nitroquinoline-1-oxide	CTNB1_HUMAN	11746832;12747976;12570056
4-nitroquinoline-1-oxide	P53_HUMAN	11423347;10357771
tubercidin	BCLX_HUMAN	15239106
zeatin	LRP1_HUMAN	15940868
zeatin	MOK_HUMAN	15728338;9874810;12644686;11331778;10364407
theobromine	JIP1_HUMAN	11522602
diazoxide	HCD2_HUMAN	15870679
2-aminopurine	APLP1_HUMAN	12882959
beta-naphthoflavone	A4_HUMAN	1479538;6200955
beta-naphthoflavone	CATB_HUMAN	1479538;6200955
beta-naphthoflavone	ODO2_HUMAN	11714484;11430590
kinetin	LRP1_HUMAN	15940868
kinetin	PIN1_HUMAN	10760240
kinetin	CDK5_HUMAN	10465404;9933594;11054815;15006135;10495356;11923424;15152189;11268215;15240808;15130771;15331409;9030781;14743398
kinetin	TAU_HUMAN	11054815
kinetin	BCLX_HUMAN	15051486
kinetin	STX1A_HUMAN	9933594
kinetin	STXB1_HUMAN	9933594
perindopril	CLUS_HUMAN	8629631
alpha-tocopherol	TAU_HUMAN	15203189
alpha-tocopherol	SYUG_HUMAN	11880569
alpha-tocopherol	BCL2_HUMAN	15753136;15318806
alpha-tocopherol	CAH9_HUMAN	14607528
alpha-tocopherol	STXB1_HUMAN	11752058
allopurinol	A4_HUMAN	6982678
allopurinol	CATB_HUMAN	6982678
allopurinol	GLNA_HUMAN	11821727
allopurinol	STXB1_HUMAN	14521919
allopurinol	OTC_HUMAN	10502831;15159648;9028466
5,7-dihydroxytryptamine	A4_HUMAN	8378353
5,7-dihydroxytryptamine	CATB_HUMAN	8378353
5,7-dihydroxytryptamine	BLMH_HUMAN	12593863
5,7-dihydroxytryptamine	5HT2C_HUMAN	15232674;9268064;9630549;8301563;11267640;15056702;10211591
5,7-dihydroxytryptamine	GFAP_HUMAN	8082031;7910108
5,7-dihydroxytryptamine	CAH9_HUMAN	12903481
silymarin	BCLX_HUMAN	14555614
silymarin	BCL2_HUMAN	10377442
silymarin	SHC1_HUMAN	9581834;11007941;11170137
albendazole	CH60_HUMAN	10529359
ochratoxins	BCLX_HUMAN	15056805
ochratoxins	SHC1_HUMAN	14575639
ochratoxins	OTC_HUMAN	12849727;15147798;12505377
nomifensine	ODO2_HUMAN	3796794
nomifensine	SYUG_HUMAN	3100770
nomifensine	5HT2C_HUMAN	9920211
nomifensine	PEN2_HUMAN	7659278
benzoflavones	A4_HUMAN	1479538;9748493;6200955
benzoflavones	CATB_HUMAN	1479538;9748493;6200955
benzoflavones	ODO2_HUMAN	11714484
benzoflavones	SYUG_HUMAN	8461036
benzoflavones	JIP1_HUMAN	7568105
ibogaine	5HT2C_HUMAN	11705117;10368872
ibogaine	PEN2_HUMAN	9106464;9106462
oxazepam	RAGE_HUMAN	1164858;235008
oxazepam	FLNA_HUMAN	2054732
oxazepam	MOK_HUMAN	1164858;235008
oxazepam	AACT_HUMAN	6139491
mibefradil	GLNA_HUMAN	11358939
mibefradil	SHC1_HUMAN	16054119
curare	CAH9_HUMAN	6726350;1880552
chlorothiazide	CLUS_HUMAN	2721120
chlorothiazide	AACT_HUMAN	6749348
chlorothiazide	HCD2_HUMAN	15870679
tolonium chloride	A4_HUMAN	9514508
tolonium chloride	CATB_HUMAN	9514508
tolonium chloride	Q9UII7_HUMAN	11516205
tocopherols	APLP1_HUMAN	12777052;15691027;15200386;12403570;11791583
dicumarol	SYUG_HUMAN	7679576
dicumarol	P53_HUMAN	11158615;14634213
dicumarol	JIP1_HUMAN	11856743
dicumarol	CAH9_HUMAN	14751451
quinacrine mustard	TAU_HUMAN	15611092
thiabendazole	CAH9_HUMAN	7854141
thiabendazole	HCD2_HUMAN	3832493
devazepide	NCKP1_HUMAN	8581271
devazepide	SYUG_HUMAN	7681406
devazepide	BLMH_HUMAN	7875937;2257485;7679224;8088368
isopentenyladenosine	CDK5_HUMAN	10495356
benzydamine	BLMH_HUMAN	15333399;11589263
cromolyn sodium	S100B_HUMAN	11944917
cromolyn sodium	SYUG_HUMAN	6194083;3108486
cromolyn sodium	BLMH_HUMAN	3923855
cromolyn sodium	JIP1_HUMAN	9831931
cromolyn sodium	S10A1_HUMAN	11944917
cromolyn sodium	OTC_HUMAN	12117084
chlorzoxazone	FHL2_HUMAN	8858968
formyltetrahydrofolates	C1TC_HUMAN	1108614;6967110;328341;8405432;30404;3651425;1220683;350869;444533
azaguanine	APH1A_HUMAN	7612966
fenoldopam	APH1A_HUMAN	1969238
acenocoumarol	AACT_HUMAN	8314171
lyngbya toxins	APLP1_HUMAN	2253773;2602368
alcian blue	GLNA_HUMAN	1711352
hematoxylin	CAH9_HUMAN	8600036
riluzole	CDK5_HUMAN	12666110
rhodamine 123	LRP1_HUMAN	11469885;9029025
rhodamine 123	CATB_HUMAN	12948017
rhodamine 123	BCLX_HUMAN	10078199
rhodamine 123	OTC_HUMAN	6545081
pteroylpolyglutamic acids	C1TC_HUMAN	6351555;447824;9250969;2373684;6412522;6458763;7051769;3872659;15503105;8961940;6609718;6604398
penicillin g, procaine	OTC_HUMAN	15500573;2704059
trimetrexate	BCL2_HUMAN	8622946
vindesine	APLP1_HUMAN	15013587
etodolac	SYUG_HUMAN	1468239;12841927;8210919
etodolac	Q9UII7_HUMAN	12483244
gliotoxin	SYUG_HUMAN	12427489
gliotoxin	BCLX_HUMAN	10914496;15114061
gliotoxin	BCL2_HUMAN	11320150
gliotoxin	STXB1_HUMAN	15618159
griseofulvin	TAU_HUMAN	10051481
hydroxychloroquine	BCLX_HUMAN	12813466
tacrine	A4_HUMAN	8835781;8046778
tacrine	CLUS_HUMAN	7701852
tacrine	CDK5_HUMAN	15665397
tacrine	CATB_HUMAN	9329715;7898757;8835781;8046778
tacrine	5HT2C_HUMAN	15990178;12420151
tacrine	APOE_HUMAN	8993489
tacrine	APLP1_HUMAN	11746658
