# Supplementary material for: Building Disease-Specific Drug-Protein Connectivity Maps from Molecular Interaction Networks and PubMed Abstracts
Source: PLoS Comput Biol. 2009 Jul 31;5(7):e1000450. doi: 10.1371/journal.pcbi.1000450 (PMC2709445; doi:10.1371/journal.pcbi.1000450)
Supplement: Dataset S4 — The file includes the complete drug lists for breast cancer, pancreatic cancer, leukemia, lung cancer, ovarian cancer and prostate cancer. Like Dataset S2 for AD, it contains False Discover Rate (FDR), Document Frequency (DF) in the retrieved PubMed abstract corpus, Pharmacological Action, and validation flags (Found In GS and Found In DrugBank) for each drug. (1.13 MB XLS) [file pcbi.1000450.s004.xls]

## Sheet: Breast
Drug	FDR	DF	Pharmacological Action	Found In GS	Found In DrugBank
Anastrozole	<1.00E-16	222	Antineoplastic Agents, Antineoplastic Agents, Hormonal, Aromatase Inhibitors, Enzyme Inhibitors,	Yes	Yes
Exemestane	<1.00E-16	130	Antineoplastic Agents, Aromatase Inhibitors, Enzyme Inhibitors,	Yes	Yes
Gemcitabine	<1.00E-16	386	Anti-Infective Agents, Antineoplastic Agents, Antimetabolites, Antimetabolites, Antineoplastic, Antiviral Agents, Enzyme Inhibitors, Noxae, Immunologic Factors, Immunosuppressive Agents, Radiation-Sensitizing Agents,	Yes	Yes
Trastuzumab	<1.00E-16	361	Antineoplastic Agents,	Yes	Yes
Letrozole	<1.00E-16	212	Antineoplastic Agents, Aromatase Inhibitors, Enzyme Inhibitors,	Yes	Yes
Tamoxifen	<1.00E-16	2133	Antineoplastic Agents, Hormonal, Antineoplastic Agents, Bone Density Conservation Agents, Estrogen Antagonists, Estrogen Receptor Modulators, Hormones, Hormone Substitutes, and Hormone Antagonists, Hormone Antagonists, Selective Estrogen Receptor Modulators,	Yes	Yes
Zinc	<1.00E-16	5647	Micronutrients, Growth Substances, Trace Elements,	Yes	No
Fructose	<1.00E-16	510	Flavoring Agents, Food Additives, Sweetening Agents,	Yes	No
Mitomycin	<1.00E-16	1566	Alkylating Agents, Antibiotics, Antineoplastic, Antineoplastic Agents, Cross-Linking Reagents, Enzyme Inhibitors, Noxae, Nucleic Acid Synthesis Inhibitors, Indicators and Reagents,	Yes	No
Vitamin A	<1.00E-16	2906	Micronutrients, Growth Substances, Vitamins,	Yes	No
Chromium	<1.00E-16	495	Micronutrients, Growth Substances, Trace Elements,	Yes	No
Cyclosporine	<1.00E-16	1182	Anti-Infective Agents, Antifungal Agents, Antirheumatic Agents, Dermatologic Agents, Enzyme Inhibitors, Immunologic Factors, Immunosuppressive Agents,	Yes	No
Glycerol	<1.00E-16	1275	Cryoprotective Agents, Protective Agents, Solvents,	Yes	No
Lovastatin	<1.00E-16	318	Anticholesteremic Agents, Antilipemic Agents, Antimetabolites, Enzyme Inhibitors, Hydroxymethylglutaryl-CoA Reductase Inhibitors,	Yes	No
Tacrolimus	<1.00E-16	405	Immunologic Factors, Immunosuppressive Agents,	Yes	No
Theophylline	<1.00E-16	301	Anti-Asthmatic Agents, Autonomic Agents, Bronchodilator Agents, Cardiovascular Agents, Enzyme Inhibitors, Peripheral Nervous System Agents, Phosphodiesterase Inhibitors, Vasodilator Agents, Respiratory System Agents,	Yes	No
Epinephrine	<1.00E-16	684	Adrenergic Agonists, Adrenergic alpha-Agonists, Adrenergic Agents, Adrenergic beta-Agonists, Anti-Asthmatic Agents, Autonomic Agents, Cardiovascular Agents, Bronchodilator Agents, Mydriatics, Peripheral Nervous System Agents, Neurotransmitter Agents, Sympathomimetics, Vasoconstrictor Agents, Respiratory System Agents,	Yes	No
Haloperidol	<1.00E-16	304	Anti-Dyskinesia Agents, Antiemetics, Autonomic Agents, Antipsychotic Agents, Central Nervous System Agents, Central Nervous System Depressants, Dopamine Agents, Dopamine Antagonists, Gastrointestinal Agents, Peripheral Nervous System Agents, Neurotransmitter Agents, Tranquilizing Agents, Psychotropic Drugs,	Yes	No
Oxytocin	<1.00E-16	412	Oxytocics, Reproductive Control Agents,	Yes	No
Vitamin E	<1.00E-16	660	Antioxidants, Micronutrients, Protective Agents, Growth Substances, Vitamins,	Yes	No
Cytarabine	<1.00E-16	564	Anti-Infective Agents, Antimetabolites, Antimetabolites, Antineoplastic, Antineoplastic Agents, Antiviral Agents, Noxae, Immunologic Factors, Immunosuppressive Agents,	Yes	No
Tuberculin	<1.00E-16	102	Indicators and Reagents,	Yes	No
Dextrans	<1.00E-16	203	Anticoagulants, Blood Substitutes, Hematologic Agents, Plasma Substitutes,	Yes	No
Chlorpropamide	<1.00E-16	3	Hypoglycemic Agents,	Yes	No
Insulin	<1.00E-16	20763	Hypoglycemic Agents,	Yes	No
Dopamine	<1.00E-16	2161	Autonomic Agents, Cardiotonic Agents, Cardiovascular Agents, Dopamine Agents, Protective Agents, Peripheral Nervous System Agents, Neurotransmitter Agents, Sympathomimetics,	Yes	No
Norepinephrine	<1.00E-16	1580	Adrenergic Agonists, Adrenergic alpha-Agonists, Adrenergic Agents, Autonomic Agents, Cardiovascular Agents, Peripheral Nervous System Agents, Neurotransmitter Agents, Sympathomimetics, Vasoconstrictor Agents,	Yes	No
Angiotensin Ii	<1.00E-16	1613	Cardiovascular Agents, Vasoconstrictor Agents,	Yes	No
Biotin	<1.00E-16	1652	Micronutrients, Growth Substances, Vitamin B Complex, Vitamins,	Yes	No
Aminoglutethimide	<1.00E-16	173	Adrenergic Agents, Antineoplastic Agents, Antineoplastic Agents, Hormonal, Aromatase Inhibitors, Enzyme Inhibitors, Neurotransmitter Agents,	Yes	No
Estrone	<1.00E-16	401	Estrogens, Hormones, Hormones, Hormone Substitutes, and Hormone Antagonists,	Yes	No
Sulfamethoxazole	<1.00E-16	95	Anti-Infective Agents,	Yes	No
Annexin A5	<1.00E-16	2171	Enzyme Inhibitors,	Yes	No
Perphenazine	<1.00E-16	17	Antipsychotic Agents, Central Nervous System Depressants, Central Nervous System Agents, Dopamine Agents, Dopamine Antagonists, Neurotransmitter Agents, Tranquilizing Agents, Psychotropic Drugs,	Yes	No
Epothilones	<1.00E-16	6	Antimitotic Agents, Mitosis Modulators, Tubulin Modulators,	Yes	No
Dydrogesterone	<1.00E-16	4	Hormones, Hormones, Hormone Substitutes, and Hormone Antagonists, Progestins,	Yes	No
Amiloride	<1.00E-16	366	Cardiovascular Agents, Diuretics, Membrane Transport Modulators, Natriuretic Agents, Sodium Channel Blockers,	Yes	No
Thrombin	<1.00E-16	2206	Coagulants, Hematologic Agents, Hemostatics,	Yes	No
Losartan	<1.00E-16	283	Angiotensin II Type 1 Receptor Blockers, Anti-Arrhythmia Agents, Antihypertensive Agents, Cardiovascular Agents,	Yes	No
Nicotine	<1.00E-16	485	Autonomic Agents, Cholinergic Agents, Cholinergic Agonists, Ganglionic Stimulants, Peripheral Nervous System Agents, Neurotransmitter Agents, Nicotinic Agonists,	Yes	No
Sirolimus	<1.00E-16	2278	Anti-Bacterial Agents, Anti-Infective Agents, Antibiotics, Antineoplastic, Antifungal Agents, Antineoplastic Agents, Immunologic Factors, Immunosuppressive Agents,	Yes	No
Testosterone	<1.00E-16	2494	Androgens, Hormones, Hormone Substitutes, and Hormone Antagonists, Hormones,	Yes	No
Acetic Acid	<1.00E-16	755	Indicators and Reagents,	Yes	No
Adrenocorticotropic Hormone	<1.00E-16	459	Hormones, Hormones, Hormone Substitutes, and Hormone Antagonists,	Yes	No
Ciprofloxacin	<1.00E-16	591	Anti-Infective Agents, Enzyme Inhibitors, Nucleic Acid Synthesis Inhibitors,	Yes	No
Acyclovir	<1.00E-16	67	Anti-Infective Agents, Antiviral Agents,	Yes	No
Zidovudine	<1.00E-16	186	Anti-HIV Agents, Anti-Infective Agents, Anti-Retroviral Agents, Antimetabolites, Antiviral Agents, Enzyme Inhibitors, Noxae, Nucleic Acid Synthesis Inhibitors, Reverse Transcriptase Inhibitors,	Yes	No
Calcitriol	<1.00E-16	710	Cardiovascular Agents, Bone Density Conservation Agents, Calcium Channel Agonists, Membrane Transport Modulators, Micronutrients, Growth Substances, Vasoconstrictor Agents, Vitamins,	Yes	No
Chloroform	<1.00E-16	15	Solvents,	Yes	No
Oxyphenbutazone	<1.00E-16	2	Analgesics, Analgesics, Non-Narcotic, Anti-Inflammatory Agents, Non-Steroidal, Anti-Inflammatory Agents, Antirheumatic Agents, Peripheral Nervous System Agents, Sensory System Agents,	Yes	No
Acetylcysteine	<1.00E-16	1129	Anti-Infective Agents, Antioxidants, Antiviral Agents, Free Radical Scavengers, Expectorants, Respiratory System Agents,	Yes	No
Estradiol	<1.00E-16	6501	Estrogens, Hormones, Hormones, Hormone Substitutes, and Hormone Antagonists,	Yes	No
Capsaicin	<1.00E-16	278	Antipruritics, Dermatologic Agents, Peripheral Nervous System Agents, Sensory System Agents,	Yes	No
Charcoal	<1.00E-16	637	Antidotes, Protective Agents,	Yes	No
Chlorpromazine	<1.00E-16	212	Antiemetics, Antipsychotic Agents, Autonomic Agents, Central Nervous System Agents, Central Nervous System Depressants, Dopamine Agents, Dopamine Antagonists, Gastrointestinal Agents, Peripheral Nervous System Agents, Neurotransmitter Agents, Tranquilizing Agents, Psychotropic Drugs,	Yes	No
Ganciclovir	<1.00E-16	148	Anti-Infective Agents, Antiviral Agents,	Yes	No
Bence Jones Protein	<1.00E-16	10	Immunologic Factors,	Yes	No
Manganese	<1.00E-16	912	Micronutrients, Growth Substances, Trace Elements,	Yes	No
Norgestrel	<1.00E-16	6	Contraceptive Agents, Contraceptive Agents, Female, Contraceptives, Oral, Contraceptives, Oral, Synthetic, Reproductive Control Agents,	Yes	No
Dexamethasone	<1.00E-16	3468	Adrenal Cortex Hormones, Anti-Inflammatory Agents, Antiemetics, Antineoplastic Agents, Antineoplastic Agents, Hormonal, Autonomic Agents, Central Nervous System Agents, Gastrointestinal Agents, Peripheral Nervous System Agents, Hormones, Hormones, Hormone Substitutes, and Hormone Antagonists, Glucocorticoids,	Yes	No
Tetrahydrocannabinol	<1.00E-16	78	Analgesics, Analgesics, Non-Narcotic, Central Nervous System Agents, Hallucinogens, Peripheral Nervous System Agents, Psychotropic Drugs, Sensory System Agents,	Yes	No
Tryptophan	<1.00E-16	1188	Antidepressive Agents, Antidepressive Agents, Second-Generation, Central Nervous System Agents, Psychotropic Drugs,	Yes	No
Heparin	<1.00E-16	1997	Anticoagulants, Cardiovascular Agents, Fibrinolytic Agents, Fibrin Modulating Agents, Hematologic Agents,	Yes	No
Inositol	<1.00E-16	5198	Micronutrients, Growth Substances, Vitamin B Complex, Vitamins,	Yes	No
Choline	<1.00E-16	882	Antilipemic Agents, Antimetabolites, Central Nervous System Agents, Gastrointestinal Agents, Lipotropic Agents, Nootropic Agents,	Yes	No
Captopril	<1.00E-16	184	Angiotensin-Converting Enzyme Inhibitors, Antihypertensive Agents, Cardiovascular Agents, Enzyme Inhibitors, Protease Inhibitors,	Yes	No
Pravastatin	<1.00E-16	110	Anticholesteremic Agents, Antilipemic Agents, Antimetabolites, Enzyme Inhibitors, Hydroxymethylglutaryl-CoA Reductase Inhibitors,	Yes	No
Trimethoprim	<1.00E-16	126	Anti-Infective Agents, Anti-Infective Agents, Urinary, Antimalarials, Antiparasitic Agents, Antiprotozoal Agents, Enzyme Inhibitors, Folic Acid Antagonists, Renal Agents,	Yes	No
Triptorelin	<1.00E-16	12	Antineoplastic Agents, Antineoplastic Agents, Hormonal, Contraceptive Agents, Contraceptive Agents, Female, Luteolytic Agents, Reproductive Control Agents,	Yes	No
Fludrocortisone	<1.00E-16	5	Anti-Inflammatory Agents,	Yes	No
Diatrizoate	<1.00E-16	7	Contrast Media,	Yes	No
Astemizole	<1.00E-16	5	Anti-Allergic Agents, Neurotransmitter Agents, Histamine Agents, Histamine Antagonists, Histamine H1 Antagonists, Histamine H1 Antagonists, Non-Sedating,	Yes	No
Quinacrine	<1.00E-16	6	Anthelmintics, Anti-Infective Agents, Anticestodal Agents, Antimalarials, Antinematodal Agents, Antiparasitic Agents, Antiplatyhelmintic Agents, Antineoplastic Agents, Antiprotozoal Agents, Enzyme Inhibitors,	Yes	No
Cimetidine	<1.00E-16	141	Anti-Ulcer Agents, Enzyme Inhibitors, Gastrointestinal Agents, Neurotransmitter Agents, Histamine Agents, Histamine Antagonists, Histamine H2 Antagonists,	Yes	No
Histamine	<1.00E-16	1349	Histamine Agents, Neurotransmitter Agents, Histamine Agonists,	Yes	No
Selenium	<1.00E-16	513	Antioxidants, Micronutrients, Protective Agents, Growth Substances, Trace Elements,	Yes	No
Vitamin D	<1.00E-16	2882	Bone Density Conservation Agents, Micronutrients, Growth Substances, Vitamins,	Yes	No
Acetylcholine	<1.00E-16	1919	Cardiovascular Agents, Cholinergic Agents, Neurotransmitter Agents, Vasodilator Agents,	Yes	No
Glucagon	<1.00E-16	890	Gastrointestinal Agents, Hormones, Hormones, Hormone Substitutes, and Hormone Antagonists,	Yes	No
Isoproterenol	<1.00E-16	906	Adrenergic Agonists, Adrenergic Agents, Adrenergic beta-Agonists, Anti-Asthmatic Agents, Autonomic Agents, Cardiotonic Agents, Cardiovascular Agents, Bronchodilator Agents, Protective Agents, Peripheral Nervous System Agents, Neurotransmitter Agents, Sympathomimetics, Respiratory System Agents,	Yes	No
Naloxone	<1.00E-16	358	Central Nervous System Agents, Narcotic Antagonists, Peripheral Nervous System Agents, Sensory System Agents,	Yes	No
Superoxide Dismutase	<1.00E-16	2915	Antioxidants, Free Radical Scavengers,	Yes	No
Antithrombin Iii	<1.00E-16	174	Anticoagulants, Enzyme Inhibitors, Protease Inhibitors, Hematologic Agents, Serine Proteinase Inhibitors,	Yes	No
Podophyllin	<1.00E-16	8	Antineoplastic Agents, Phytogenic, Antineoplastic Agents, Caustics, Dermatologic Agents, Noxae, Keratolytic Agents,	Yes	No
Iron	<1.00E-16	2718	Micronutrients, Growth Substances, Trace Elements,	Yes	No
Nitric Oxide	<1.00E-16	5781	Anti-Asthmatic Agents, Antioxidants, Autonomic Agents, Cardiovascular Agents, Bronchodilator Agents, Endothelium-Dependent Relaxing Factors, Free Radical Scavengers, Peripheral Nervous System Agents, Neurotransmitter Agents, Vasodilator Agents, Respiratory System Agents,	Yes	No
Ascorbic Acid	<1.00E-16	771	Antioxidants, Protective Agents, Micronutrients, Growth Substances, Vitamins,	Yes	No
Cisplatin	<1.00E-16	3739	Antineoplastic Agents, Cross-Linking Reagents, Indicators and Reagents, Radiation-Sensitizing Agents,	Yes	No
Cyclin-Dependent Kinase Inhibitor P27	<1.00E-16	5653	Enzyme Inhibitors, Protein Kinase Inhibitors,	Yes	No
Fluorescein	<1.00E-16	1134	Contrast Media, Coloring Agents, Fluorescent Dyes, Luminescent Agents, Indicators and Reagents,	Yes	No
Raloxifene	<1.00E-16	275	Bone Density Conservation Agents, Estrogen Antagonists, Estrogen Receptor Modulators, Hormones, Hormone Substitutes, and Hormone Antagonists, Hormone Antagonists, Selective Estrogen Receptor Modulators,	Yes	No
Methotrexate	<1.00E-16	750	Abortifacient Agents, Abortifacient Agents, Nonsteroidal, Antimetabolites, Antimetabolites, Antineoplastic, Antineoplastic Agents, Antirheumatic Agents, Dermatologic Agents, Enzyme Inhibitors, Folic Acid Antagonists, Noxae, Nucleic Acid Synthesis Inhibitors, Immunologic Factors, Immunosuppressive Agents, Reproductive Control Agents,	Yes	No
Morphine	<1.00E-16	609	Analgesics, Analgesics, Opioid, Central Nervous System Agents, Central Nervous System Depressants, Narcotics, Peripheral Nervous System Agents, Sensory System Agents,	Yes	No
Neomycin	<1.00E-16	588	Anti-Infective Agents, Anti-Bacterial Agents, Enzyme Inhibitors, Protein Synthesis Inhibitors,	Yes	No
Chorionic Gonadotropin	<1.00E-16	518	Reproductive Control Agents,	Yes	No
Methylene Blue	<1.00E-16	128	Enzyme Inhibitors,	Yes	No
Penicillamine	<1.00E-16	193	Antidotes, Antirheumatic Agents, Chelating Agents, Protective Agents,	Yes	No
Bleomycin	<1.00E-16	1436	Antibiotics, Antineoplastic, Antineoplastic Agents,	Yes	No
Superoxides	<1.00E-16	1965	Noxae, Oxidants,	Yes	No
Endothelial Growth Factors	<1.00E-16	1941	Growth Substances,	Yes	No
Fluoxymesterone	<1.00E-16	4	Anabolic Agents, Hormones, Hormones, Hormone Substitutes, and Hormone Antagonists,	Yes	No
Peroxides	<1.00E-16	205	Noxae, Oxidants,	Yes	No
Cryoglobulins	<1.00E-16	9	Immunologic Factors,	Yes	No
Megestrol Acetate	<1.00E-16	16	Antineoplastic Agents, Hormonal, Antineoplastic Agents, Appetite Stimulants, Central Nervous System Agents, Central Nervous System Stimulants,	Yes	No
Dihydroxycholecalciferols	<1.00E-16	6	Bone Density Conservation Agents, Micronutrients, Growth Substances, Vitamins,	Yes	No
Cyclin-Dependent Kinase Inhibitor P21	<1.00E-16	6941	Enzyme Inhibitors, Protein Kinase Inhibitors,	Yes	No
Fluorouracil	<1.00E-16	1577	Antineoplastic Agents, Antimetabolites, Antimetabolites, Antineoplastic, Noxae, Immunologic Factors, Immunosuppressive Agents,	Yes	No
Progesterone	<1.00E-16	5590	Hormones, Hormone Substitutes, and Hormone Antagonists, Hormones, Progestins,	Yes	No
Adenosine	<1.00E-16	3604	Analgesics, Anti-Arrhythmia Agents, Cardiovascular Agents, Central Nervous System Agents, Peripheral Nervous System Agents, Vasodilator Agents, Sensory System Agents,	Yes	No
Bradykinin	<1.00E-16	361	Cardiovascular Agents, Vasodilator Agents,	Yes	No
Copper	<1.00E-16	1900	Micronutrients, Growth Substances, Trace Elements,	Yes	No
Nitroprusside	<1.00E-16	546	Antihypertensive Agents, Cardiovascular Agents, Indicators and Reagents, Nitric Oxide Donors, Vasodilator Agents,	Yes	No
Factor Viii	<1.00E-16	323	Coagulants, Hematologic Agents,	Yes	No
Azathioprine	<1.00E-16	157	Antimetabolites, Antimetabolites, Antineoplastic, Antineoplastic Agents, Antirheumatic Agents, Noxae, Immunologic Factors, Immunosuppressive Agents,	Yes	No
Sodium Hydroxide	<1.00E-16	9	Caustics, Noxae,	Yes	No
Fluorescein-5-Isothiocyanate	<1.00E-16	245	Coloring Agents, Fluorescent Dyes, Luminescent Agents, Indicators and Reagents,	Yes	No
Angiostatins	<1.00E-16	6	Angiogenesis Inhibitors, Angiogenesis Modulating Agents, Antineoplastic Agents, Growth Substances, Growth Inhibitors,	Yes	No
Dacarbazine	<1.00E-16	190	Alkylating Agents, Antineoplastic Agents, Antineoplastic Agents, Alkylating, Noxae,	Yes	No
Nogalamycin	<1.00E-16	6	Antibiotics, Antineoplastic, Antineoplastic Agents, Enzyme Inhibitors, Nucleic Acid Synthesis Inhibitors, Indicators and Reagents, Intercalating Agents,	Yes	No
6-Aminocaproic Acid	<1.00E-16	2	Antifibrinolytic Agents, Coagulants, Fibrin Modulating Agents, Hematologic Agents, Hemostatics,	No	No
Abatacept	<1.00E-16	2	Antirheumatic Agents, Immunologic Factors, Immunosuppressive Agents,	No	No
Abelcet	<1.00E-16	2	Anti-Infective Agents, Antifungal Agents,	No	No
Acamprosate	<1.00E-16	3	Alcohol Deterrents, Central Nervous System Agents,	No	No
Acarbose	<1.00E-16	11	Enzyme Inhibitors, Hypoglycemic Agents,	No	No
Acebutolol	<1.00E-16	9	Adrenergic Antagonists, Adrenergic Agents, Adrenergic beta-Antagonists, Anti-Arrhythmia Agents, Antihypertensive Agents, Cardiovascular Agents, Neurotransmitter Agents,	No	No
Acetohydroxamic Acid	<1.00E-16	2	Enzyme Inhibitors,	No	No
Adderall	<1.00E-16	3	Central Nervous System Agents, Central Nervous System Stimulants,	No	No
Alfuzosin	<1.00E-16	3	Adrenergic alpha-Antagonists, Adrenergic Antagonists, Adrenergic Agents, Antihypertensive Agents, Cardiovascular Agents, Neurotransmitter Agents,	No	No
Alginic Acid	<1.00E-16	3	Biocompatible Materials, Coagulants, Protective Agents, Hematologic Agents, Hemostatics, Radiation-Protective Agents,	No	No
Almitrine	<1.00E-16	6	Respiratory System Agents,	No	No
Amanitins	<1.00E-16	9	Enzyme Inhibitors, Noxae, Nucleic Acid Synthesis Inhibitors, Poisons,	No	No
Ambisome	<1.00E-16	3	Anti-Infective Agents, Antifungal Agents, Antibiotics, Antifungal, Antiparasitic Agents, Antiprotozoal Agents,	No	No
Ammonium Molybdate	<1.00E-16	11	Coloring Agents,	No	No
Amoxapine	<1.00E-16	2	Adrenergic Agents, Adrenergic Uptake Inhibitors, Antidepressive Agents, Antidepressive Agents, Second-Generation, Central Nervous System Agents, Dopamine Agents, Dopamine Antagonists, Neurotransmitter Agents, Neurotransmitter Uptake Inhibitors, Serotonin Agents, Serotonin Uptake Inhibitors, Psychotropic Drugs,	No	No
Amphetamine	<1.00E-16	271	Adrenergic Agents, Adrenergic Uptake Inhibitors, Autonomic Agents, Central Nervous System Agents, Central Nervous System Stimulants, Dopamine Agents, Dopamine Uptake Inhibitors, Peripheral Nervous System Agents, Neurotransmitter Agents, Neurotransmitter Uptake Inhibitors, Sympathomimetics,	No	No
Antazoline	<1.00E-16	2	Anti-Allergic Agents, Neurotransmitter Agents, Histamine Agents, Histamine Antagonists, Histamine H1 Antagonists,	No	No
Antimony Sodium Gluconate	<1.00E-16	6	Anthelmintics, Anti-Infective Agents, Antiparasitic Agents, Antiplatyhelmintic Agents, Antiprotozoal Agents, Schistosomicides,	No	No
Aprepitant	<1.00E-16	6	Antiemetics, Autonomic Agents, Central Nervous System Agents, Gastrointestinal Agents, Peripheral Nervous System Agents,	No	No
Argatroban	<1.00E-16	2	Anticoagulants, Hematologic Agents, Platelet Aggregation Inhibitors,	No	No
Arthrotec	<1.00E-16	2	Analgesics, Analgesics, Non-Narcotic, Anti-Inflammatory Agents, Anti-Inflammatory Agents, Non-Steroidal, Antirheumatic Agents, Peripheral Nervous System Agents, Sensory System Agents,	No	No
Bendroflumethiazide	<1.00E-16	2	Antihypertensive Agents, Cardiovascular Agents, Diuretics, Membrane Transport Modulators, Natriuretic Agents, Sodium Chloride Symporter Inhibitors,	No	No
Bentonite	<1.00E-16	8	Antidotes, Protective Agents,	No	No
Benzoic Acid	<1.00E-16	199	Food Additives, Food Preservatives,	No	No
Benztropine	<1.00E-16	3	Anti-Dyskinesia Agents, Antiparkinson Agents, Autonomic Agents, Central Nervous System Agents, Cholinergic Agents, Cholinergic Antagonists, Dopamine Agents, Dopamine Uptake Inhibitors, Muscarinic Antagonists, Parasympatholytics, Peripheral Nervous System Agents, Neurotransmitter Agents, Neurotransmitter Uptake Inhibitors,	No	No
Benzydamine	<1.00E-16	3	Anti-Inflammatory Agents,	No	No
Biperiden	<1.00E-16	5	Anti-Dyskinesia Agents, Antiparkinson Agents, Autonomic Agents, Central Nervous System Agents, Cholinergic Agents, Cholinergic Antagonists, Muscarinic Antagonists, Parasympatholytics, Peripheral Nervous System Agents, Neurotransmitter Agents,	No	No
Bongkrekic Acid	<1.00E-16	30	Anti-Bacterial Agents, Anti-Infective Agents,	No	No
Boric Acid	<1.00E-16	14	Pesticides, Insecticides,	No	No
Brilliant Green	<1.00E-16	2	Anti-Infective Agents, Anti-Infective Agents, Local, Coloring Agents,	No	No
Bromhexine	<1.00E-16	2	Expectorants, Respiratory System Agents,	No	No
Bromides	<1.00E-16	6	Anticonvulsants, Central Nervous System Agents,	No	No
Brompheniramine	<1.00E-16	3	Anti-Allergic Agents, Neurotransmitter Agents, Histamine Agents, Histamine Antagonists, Histamine H1 Antagonists,	No	No
Calcium Acetate	<1.00E-16	5	Chelating Agents,	No	No
Calcium Sulfate	<1.00E-16	6	Dental Materials,	No	No
Carbetapentane	<1.00E-16	2	Antitussive Agents, Central Nervous System Agents, Respiratory System Agents,	No	No
Carisoprodol	<1.00E-16	2	Central Nervous System Agents, Muscle Relaxants, Central, Neuromuscular Agents, Peripheral Nervous System Agents,	No	No
Celecoxib	<1.00E-16	393	Analgesics, Analgesics, Non-Narcotic, Anti-Inflammatory Agents, Anti-Inflammatory Agents, Non-Steroidal, Antirheumatic Agents, Cyclooxygenase Inhibitors, Enzyme Inhibitors, Peripheral Nervous System Agents, Sensory System Agents,	No	No
Cephapirin	<1.00E-16	4	Anti-Bacterial Agents, Anti-Infective Agents,	No	No
Cetuximab	<1.00E-16	101	Antineoplastic Agents,	No	No
Chloroprocaine	<1.00E-16	4	Anesthetics, Anesthetics, Local, Central Nervous System Agents, Central Nervous System Depressants, Peripheral Nervous System Agents, Sensory System Agents,	No	No
Chlorothiazide	<1.00E-16	5	Antihypertensive Agents, Cardiovascular Agents, Diuretics, Membrane Transport Modulators, Natriuretic Agents, Sodium Chloride Symporter Inhibitors,	No	No
Chlorotrianisene	<1.00E-16	25	Antineoplastic Agents, Antineoplastic Agents, Hormonal, Estrogens, Estrogens, Non-Steroidal, Hormones, Hormones, Hormone Substitutes, and Hormone Antagonists,	No	No
Chlorprothixene	<1.00E-16	2	Antipsychotic Agents, Central Nervous System Agents, Central Nervous System Depressants, Dopamine Agents, Dopamine Antagonists, Neurotransmitter Agents, Tranquilizing Agents, Psychotropic Drugs,	No	No
Ciclopirox	<1.00E-16	8	Anti-Infective Agents, Antifungal Agents,	No	No
Ciguatoxins	<1.00E-16	6	Noxae, Poisons,	No	No
Cisapride	<1.00E-16	171	Anti-Ulcer Agents, Gastrointestinal Agents, Neurotransmitter Agents, Serotonin Agonists, Serotonin Agents,	No	No
Clemastine	<1.00E-16	3	Anti-Allergic Agents, Antipruritics, Dermatologic Agents, Neurotransmitter Agents, Histamine Agents, Histamine Antagonists, Histamine H1 Antagonists,	No	No
Colestipol	<1.00E-16	4	Anion Exchange Resins, Antilipemic Agents, Antimetabolites, Ion Exchange Resins,	No	No
Conotoxins	<1.00E-16	6	Cardiovascular Agents, Calcium Channel Blockers, Noxae, Membrane Transport Modulators, Neurotoxins,	No	No
Cyclobenzaprine	<1.00E-16	2	Antidepressive Agents, Antidepressive Agents, Tricyclic, Central Nervous System Agents, Central Nervous System Depressants, Muscle Relaxants, Central, Neuromuscular Agents, Peripheral Nervous System Agents, Tranquilizing Agents, Psychotropic Drugs,	No	No
Cyclopentolate	<1.00E-16	3	Autonomic Agents, Cholinergic Agents, Cholinergic Antagonists, Muscarinic Antagonists, Parasympatholytics, Mydriatics, Peripheral Nervous System Agents, Neurotransmitter Agents,	No	No
Dalteparin	<1.00E-16	6	Anticoagulants, Cardiovascular Agents, Fibrinolytic Agents, Fibrin Modulating Agents, Hematologic Agents,	No	No
Deferasirox	<1.00E-16	2	Chelating Agents, Iron Chelating Agents,	No	No
Delavirdine	<1.00E-16	7	Anti-Infective Agents, Anti-HIV Agents, Anti-Retroviral Agents, Antiviral Agents, Enzyme Inhibitors, Nucleic Acid Synthesis Inhibitors, Reverse Transcriptase Inhibitors,	No	No
Deuterium Oxide	<1.00E-16	12	Antineoplastic Agents, Protective Agents, Radiation-Protective Agents,	No	No
Dexchlorpheniramine	<1.00E-16	2	Neurotransmitter Agents, Histamine Agents, Histamine Antagonists, Histamine H1 Antagonists,	No	No
Diethylpropion	<1.00E-16	2	Anti-Obesity Agents, Appetite Depressants, Central Nervous System Agents,	No	No
Diflunisal	<1.00E-16	9	Analgesics, Analgesics, Non-Narcotic, Anti-Inflammatory Agents, Anti-Inflammatory Agents, Non-Steroidal, Antirheumatic Agents, Cyclooxygenase Inhibitors, Enzyme Inhibitors, Peripheral Nervous System Agents, Sensory System Agents,	No	No
Dihydrocodeine	<1.00E-16	2	Analgesics, Analgesics, Opioid, Central Nervous System Agents, Central Nervous System Depressants, Peripheral Nervous System Agents, Sensory System Agents,	No	No
Dimenhydrinate	<1.00E-16	2	Antiemetics, Autonomic Agents, Central Nervous System Agents, Gastrointestinal Agents, Peripheral Nervous System Agents, Histamine Agents, Neurotransmitter Agents, Histamine Antagonists, Histamine H1 Antagonists,	No	No
Dimyristoylphosphatidylcholine	<1.00E-16	9	Indicators and Reagents,	No	No
Doxapram	<1.00E-16	4	Central Nervous System Agents, Central Nervous System Stimulants, Respiratory System Agents,	No	No
Doxepin	<1.00E-16	3	Antidepressive Agents, Antidepressive Agents, Tricyclic, Central Nervous System Agents, Histamine Agents, Neurotransmitter Agents, Histamine Antagonists, Psychotropic Drugs,	No	No
Drospirenone	<1.00E-16	2	Aldosterone Antagonists, Hormone Antagonists, Hormones, Hormone Substitutes, and Hormone Antagonists,	No	No
Dutasteride	<1.00E-16	8	Enzyme Inhibitors,	No	No
Eletriptan	<1.00E-16	4	Neurotransmitter Agents, Serotonin Agents, Serotonin Agonists,	No	No
Encainide	<1.00E-16	3	Anti-Arrhythmia Agents, Cardiovascular Agents, Membrane Transport Modulators, Sodium Channel Blockers,	No	No
Enoxacin	<1.00E-16	5	Anti-Infective Agents, Enzyme Inhibitors, Nucleic Acid Synthesis Inhibitors,	No	No
Entecavir	<1.00E-16	3	Anti-Infective Agents, Antiviral Agents,	No	No
Epinastine	<1.00E-16	4	Histamine Agents, Neurotransmitter Agents, Histamine Antagonists, Histamine H1 Antagonists,	No	No
Eprosartan	<1.00E-16	4	Angiotensin II Type 1 Receptor Blockers, Antihypertensive Agents, Cardiovascular Agents,	No	No
Erlotinib	<1.00E-16	140	Enzyme Inhibitors, Protein Kinase Inhibitors,	No	No
Erythrosine	<1.00E-16	2	Coloring Agents, Fluorescent Dyes, Indicators and Reagents, Luminescent Agents,	No	No
Ethionamide	<1.00E-16	2	Anti-Bacterial Agents, Anti-Infective Agents, Antilipemic Agents, Antimetabolites, Antitubercular Agents, Fatty Acid Synthesis Inhibitors, Leprostatic Agents,	No	No
Fenbufen	<1.00E-16	3	Analgesics, Analgesics, Non-Narcotic, Anti-Inflammatory Agents, Anti-Inflammatory Agents, Non-Steroidal, Antirheumatic Agents, Cyclooxygenase Inhibitors, Enzyme Inhibitors, Peripheral Nervous System Agents, Sensory System Agents,	No	No
Fendiline	<1.00E-16	6	Cardiovascular Agents, Calcium Channel Blockers, Membrane Transport Modulators,	No	No
Fenoldopam	<1.00E-16	15	Antihypertensive Agents, Cardiovascular Agents, Dopamine Agents, Dopamine Agonists, Neurotransmitter Agents, Vasodilator Agents,	No	No
Fenoprofen	<1.00E-16	3	Analgesics, Analgesics, Non-Narcotic, Anti-Inflammatory Agents, Anti-Inflammatory Agents, Non-Steroidal, Antirheumatic Agents, Cyclooxygenase Inhibitors, Enzyme Inhibitors, Peripheral Nervous System Agents, Sensory System Agents,	No	No
Ferumoxides	<1.00E-16	2	Contrast Media,	No	No
Fluocinolone Acetonide	<1.00E-16	6	Adrenal Cortex Hormones, Anti-Inflammatory Agents, Hormones, Hormones, Hormone Substitutes, and Hormone Antagonists, Glucocorticoids,	No	No
Fluocinonide	<1.00E-16	3	Adrenal Cortex Hormones, Anti-Allergic Agents, Anti-Inflammatory Agents, Hormones, Hormones, Hormone Substitutes, and Hormone Antagonists, Glucocorticoids,	No	No
Flurazepam	<1.00E-16	9	Anti-Anxiety Agents, Central Nervous System Agents, Central Nervous System Depressants, GABA Agents, GABA Modulators, Hypnotics and Sedatives, Neurotransmitter Agents, Tranquilizing Agents, Psychotropic Drugs,	No	No
Flurothyl	<1.00E-16	6	Central Nervous System Agents, Central Nervous System Stimulants, Convulsants,	No	No
Formestane	<1.00E-16	33	Antineoplastic Agents, Aromatase Inhibitors, Enzyme Inhibitors,	No	No
Fosinopril	<1.00E-16	9	Angiotensin-Converting Enzyme Inhibitors, Antihypertensive Agents, Cardiovascular Agents, Enzyme Inhibitors, Protease Inhibitors,	No	No
Frovatriptan	<1.00E-16	4	Neurotransmitter Agents, Serotonin Agents, Serotonin Agonists,	No	No
Gabapentin	<1.00E-16	248	Analgesics, Anti-Anxiety Agents, Anti-Dyskinesia Agents, Anticonvulsants, Antimanic Agents, Antiparkinson Agents, Cardiovascular Agents, Calcium Channel Blockers, Central Nervous System Agents, Central Nervous System Depressants, Excitatory Amino Acid Agents, Excitatory Amino Acid Antagonists, Membrane Transport Modulators, Peripheral Nervous System Agents, Neurotransmitter Agents, Tranquilizing …	No	No
Gadodiamide	<1.00E-16	6	Contrast Media,	No	No
Gallium Nitrate	<1.00E-16	5	Antineoplastic Agents,	No	No
Ganirelix	<1.00E-16	2	Hormone Antagonists, Hormones, Hormone Substitutes, and Hormone Antagonists,	No	No
Gastric Inhibitory Polypeptide	<1.00E-16	6	Gastrointestinal Agents, Incretins, Hormones, Hormones, Hormone Substitutes, and Hormone Antagonists,	No	No
Gefitinib	<1.00E-16	338	Antineoplastic Agents, Enzyme Inhibitors, Protein Kinase Inhibitors,	No	No
Guaifenesin	<1.00E-16	5	Expectorants, Respiratory System Agents,	No	No
Homatropine	<1.00E-16	5	Autonomic Agents, Parasympatholytics, Peripheral Nervous System Agents,	No	No
Hydrocodone	<1.00E-16	4	Analgesics, Analgesics, Opioid, Antitussive Agents, Central Nervous System Agents, Central Nervous System Depressants, Narcotics, Peripheral Nervous System Agents, Respiratory System Agents, Sensory System Agents,	No	No
Hydroquinone	<1.00E-16	230	Antioxidants, Noxae, Protective Agents, Mutagens, Radiation-Protective Agents,	No	No
Hydroxocobalamin	<1.00E-16	6	Micronutrients, Growth Substances, Hematinics, Hematologic Agents, Vitamin B Complex, Vitamins,	No	No
Hypromellose	<1.00E-16	3	Ophthalmic Solutions, Pharmaceutical Solutions,	No	No
Imatinib	<1.00E-16	1145	Antineoplastic Agents, Enzyme Inhibitors, Protein Kinase Inhibitors,	No	No
Imiquimod	<1.00E-16	19	Adjuvants, Immunologic, Antineoplastic Agents, Immunologic Factors, Interferon Inducers,	No	No
Innovar	<1.00E-16	2	Analgesics, Anesthetics, Anesthetics, Combined, Central Nervous System Agents, Central Nervous System Depressants, Peripheral Nervous System Agents, Sensory System Agents,	No	No
Insulin Lispro	<1.00E-16	6	Hypoglycemic Agents,	No	No
Interferon Beta-1B	<1.00E-16	8	Adjuvants, Immunologic, Immunologic Factors,	No	No
Iopanoic Acid	<1.00E-16	8	Contrast Media,	No	No
Iothalamate Meglumine	<1.00E-16	6	Contrast Media,	No	No
Ipodate	<1.00E-16	2	Contrast Media,	No	No
Isoetharine	<1.00E-16	5	Adrenergic Agonists, Adrenergic Agents, Adrenergic beta-Agonists, Anti-Asthmatic Agents, Autonomic Agents, Bronchodilator Agents, Peripheral Nervous System Agents, Neurotransmitter Agents, Respiratory System Agents,	No	No
Isoxsuprine	<1.00E-16	2	Adrenergic Agonists, Adrenergic Agents, Adrenergic beta-Agonists, Autonomic Agents, Cardiovascular Agents, Peripheral Nervous System Agents, Neurotransmitter Agents, Sympathomimetics, Tocolytic Agents, Vasodilator Agents, Reproductive Control Agents,	No	No
Kynurenic Acid	<1.00E-16	9	Excitatory Amino Acid Agents, Excitatory Amino Acid Antagonists, Neurotransmitter Agents,	No	No
Lanolin	<1.00E-16	4	Cosmetics,	No	No
Lepirudin	<1.00E-16	2	Anticoagulants, Cardiovascular Agents, Fibrinolytic Agents, Fibrin Modulating Agents, Hematologic Agents,	No	No
Levobupivacaine	<1.00E-16	2	Anesthetics, Anesthetics, Local, Central Nervous System Agents, Central Nervous System Depressants, Peripheral Nervous System Agents, Sensory System Agents,	No	No
Levocetirizine	<1.00E-16	2	Histamine Agents, Histamine Antagonists, Neurotransmitter Agents, Histamine H1 Antagonists, Histamine H1 Antagonists, Non-Sedating,	No	No
Lomefloxacin	<1.00E-16	6	Anti-Infective Agents,	No	No
Loracarbef	<1.00E-16	3	Anti-Infective Agents, Anti-Bacterial Agents,	No	No
Lormetazepam	<1.00E-16	2	Central Nervous System Agents, Central Nervous System Depressants, Hypnotics and Sedatives,	No	No
Lymecycline	<1.00E-16	4	Anti-Infective Agents, Anti-Bacterial Agents,	No	No
Mafenide	<1.00E-16	2	Anti-Infective Agents, Anti-Infective Agents, Local,	No	No
Magnesium Oxide	<1.00E-16	3	Antacids,	No	No
Mebeverine	<1.00E-16	2	Anticonvulsants, Autonomic Agents, Central Nervous System Agents, Parasympatholytics, Peripheral Nervous System Agents,	No	No
Meclizine	<1.00E-16	4	Anti-Allergic Agents, Antiemetics, Autonomic Agents, Central Nervous System Agents, Gastrointestinal Agents, Peripheral Nervous System Agents, Histamine Agents, Histamine Antagonists, Neurotransmitter Agents, Histamine H1 Antagonists,	No	No
Medazepam	<1.00E-16	2	Anti-Anxiety Agents, Anticonvulsants, Central Nervous System Agents, Central Nervous System Depressants, GABA Agents, GABA Modulators, Hypnotics and Sedatives, Muscle Relaxants, Central, Neuromuscular Agents, Peripheral Nervous System Agents, Neurotransmitter Agents, Tranquilizing Agents, Psychotropic Drugs,	No	No
Memantine	<1.00E-16	13	Anti-Dyskinesia Agents, Antiparkinson Agents, Central Nervous System Agents, Dopamine Agents, Excitatory Amino Acid Agents, Excitatory Amino Acid Antagonists, Neurotransmitter Agents,	No	No
Mephobarbital	<1.00E-16	2	Anticonvulsants, Central Nervous System Agents, Central Nervous System Depressants, GABA Agents, GABA Modulators, Hypnotics and Sedatives, Neurotransmitter Agents,	No	No
Meprobamate	<1.00E-16	3	Anti-Anxiety Agents, Anticonvulsants, Central Nervous System Agents, Central Nervous System Depressants, Hypnotics and Sedatives, Muscle Relaxants, Central, Neuromuscular Agents, Peripheral Nervous System Agents, Tranquilizing Agents, Psychotropic Drugs,	No	No
Methamphetamine	<1.00E-16	134	Adrenergic Agents, Adrenergic Uptake Inhibitors, Autonomic Agents, Central Nervous System Agents, Central Nervous System Stimulants, Dopamine Agents, Dopamine Uptake Inhibitors, Peripheral Nervous System Agents, Neurotransmitter Agents, Neurotransmitter Uptake Inhibitors, Sympathomimetics,	No	No
Methazolamide	<1.00E-16	5	Carbonic Anhydrase Inhibitors, Diuretics, Enzyme Inhibitors, Natriuretic Agents,	No	No
Methocarbamol	<1.00E-16	2	Central Nervous System Agents, Muscle Relaxants, Central, Neuromuscular Agents, Peripheral Nervous System Agents,	No	No
Methoxyflurane	<1.00E-16	5	Anesthetics, Anesthetics, General, Anesthetics, Inhalation, Central Nervous System Agents, Central Nervous System Depressants,	No	No
Methyl Salicylate	<1.00E-16	6	Antirheumatic Agents, Fixatives,	No	No
Metocurine	<1.00E-16	2	Neuromuscular Agents, Neuromuscular Blocking Agents, Neuromuscular Nondepolarizing Agents, Peripheral Nervous System Agents,	No	No
Metolazone	<1.00E-16	2	Antihypertensive Agents, Cardiovascular Agents, Diuretics, Natriuretic Agents,	No	No
Mexiletine	<1.00E-16	10	Anti-Arrhythmia Agents, Cardiovascular Agents,	No	No
Micafungin	<1.00E-16	8	Anti-Infective Agents, Antifungal Agents,	No	No
Moxisylyte	<1.00E-16	2	Adrenergic alpha-Antagonists, Adrenergic Agents, Adrenergic Antagonists, Autonomic Agents, Cardiovascular Agents, Miotics, Peripheral Nervous System Agents, Neurotransmitter Agents, Sympatholytics, Vasodilator Agents,	No	No
Nabilone	<1.00E-16	2	Anti-Anxiety Agents, Antiemetics, Autonomic Agents, Central Nervous System Agents, Central Nervous System Depressants, Gastrointestinal Agents, Peripheral Nervous System Agents, Tranquilizing Agents, Psychotropic Drugs,	No	No
Naphazoline	<1.00E-16	4	Adrenergic Agonists, Adrenergic alpha-Agonists, Adrenergic Agents, Cardiovascular Agents, Nasal Decongestants, Neurotransmitter Agents, Vasoconstrictor Agents, Respiratory System Agents,	No	No
Naratriptan	<1.00E-16	8	Cardiovascular Agents, Neurotransmitter Agents, Serotonin Agents, Serotonin Agonists, Vasoconstrictor Agents,	No	No
Nefazodone	<1.00E-16	2	Antidepressive Agents, Antidepressive Agents, Second-Generation, Central Nervous System Agents, Psychotropic Drugs,	No	No
Nefopam	<1.00E-16	3	Analgesics, Analgesics, Non-Narcotic, Central Nervous System Agents, Peripheral Nervous System Agents, Sensory System Agents,	No	No
Niclosamide	<1.00E-16	2	Anthelmintics, Anti-Infective Agents, Anticestodal Agents, Antinematodal Agents, Antiparasitic Agents, Antiplatyhelmintic Agents, Molluscacides, Pesticides,	No	No
Niflumic Acid	<1.00E-16	6	Analgesics, Analgesics, Non-Narcotic, Anti-Inflammatory Agents, Non-Steroidal, Anti-Inflammatory Agents, Antirheumatic Agents, Cyclooxygenase Inhibitors, Enzyme Inhibitors, Peripheral Nervous System Agents, Sensory System Agents,	No	No
Nitrilotriacetic Acid	<1.00E-16	6	Chelating Agents,	No	No
Olmesartan Medoxomil	<1.00E-16	4	Angiotensin II Type 1 Receptor Blockers, Antihypertensive Agents, Cardiovascular Agents,	No	No
Olopatadine	<1.00E-16	3	Analgesics, Analgesics, Non-Narcotic, Anti-Allergic Agents, Anti-Inflammatory Agents, Non-Steroidal, Anti-Inflammatory Agents, Antirheumatic Agents, Peripheral Nervous System Agents, Histamine Agents, Histamine Antagonists, Neurotransmitter Agents, Histamine H1 Antagonists, Histamine H1 Antagonists, Non-Sedating, Sensory System Agents,	No	No
Olsalazine	<1.00E-16	3	Analgesics, Analgesics, Non-Narcotic, Anti-Inflammatory Agents, Non-Steroidal, Anti-Inflammatory Agents, Antirheumatic Agents, Gastrointestinal Agents, Peripheral Nervous System Agents, Sensory System Agents,	No	No
Opium	<1.00E-16	7	Analgesics, Analgesics, Opioid, Antidiarrheals, Antitussive Agents, Central Nervous System Agents, Central Nervous System Depressants, Gastrointestinal Agents, Narcotics, Peripheral Nervous System Agents, Respiratory System Agents, Sensory System Agents,	No	No
Orlistat	<1.00E-16	10	Anti-Obesity Agents, Central Nervous System Agents, Enzyme Inhibitors,	No	No
Orphenadrine	<1.00E-16	3	Anti-Dyskinesia Agents, Antiparkinson Agents, Autonomic Agents, Central Nervous System Agents, Cholinergic Agents, Cholinergic Antagonists, Muscarinic Antagonists, Muscle Relaxants, Central, Parasympatholytics, Neuromuscular Agents, Peripheral Nervous System Agents, Neurotransmitter Agents,	No	No
Oxamniquine	<1.00E-16	2	Anthelmintics, Anti-Infective Agents, Antiparasitic Agents, Antiplatyhelmintic Agents, Schistosomicides,	No	No
Palivizumab	<1.00E-16	4	Anti-Infective Agents, Antiviral Agents,	No	No
Palonosetron	<1.00E-16	2	Neurotransmitter Agents, Serotonin Agents, Serotonin Antagonists,	No	No
Paraoxon	<1.00E-16	6	Cholinergic Agents, Cholinesterase Inhibitors, Enzyme Inhibitors, Pesticides, Neurotransmitter Agents, Insecticides,	No	No
Pegaspargase	<1.00E-16	3	Antineoplastic Agents,	No	No
Peginterferon Alfa-2B	<1.00E-16	7	Anti-Infective Agents, Antiviral Agents,	No	No
Pemirolast	<1.00E-16	2	Histamine Agents, Histamine Antagonists, Neurotransmitter Agents,	No	No
Penciclovir	<1.00E-16	5	Anti-Infective Agents, Antiviral Agents,	No	No
Pheniramine	<1.00E-16	3	Anti-Allergic Agents, Antipruritics, Dermatologic Agents, Histamine Agents, Histamine Antagonists, Neurotransmitter Agents, Histamine H1 Antagonists,	No	No
Phentermine	<1.00E-16	3	Adrenergic Agents, Anti-Obesity Agents, Autonomic Agents, Appetite Depressants, Central Nervous System Stimulants, Central Nervous System Agents, Peripheral Nervous System Agents, Neurotransmitter Agents, Sympathomimetics,	No	No
Phenylethyl Alcohol	<1.00E-16	10	Anti-Infective Agents, Anti-Infective Agents, Local, Disinfectants, Pharmaceutic Aids, Preservatives, Pharmaceutical,	No	No
Pioglitazone	<1.00E-16	125	Hypoglycemic Agents,	No	No
Polygeline	<1.00E-16	2	Blood Substitutes, Hematologic Agents, Plasma Substitutes,	No	No
Potassium Citrate	<1.00E-16	3	Diuretics, Expectorants, Natriuretic Agents, Respiratory System Agents,	No	No
Potassium Nitrate	<1.00E-16	6	Explosive Agents,	No	No
Prodigiosin	<1.00E-16	7	Anti-Infective Agents, Anti-Bacterial Agents,	No	No
Promazine	<1.00E-16	2	Antiemetics, Autonomic Agents, Antipsychotic Agents, Central Nervous System Depressants, Central Nervous System Agents, Dopamine Agents, Dopamine Antagonists, Gastrointestinal Agents, Peripheral Nervous System Agents, Neurotransmitter Agents, Tranquilizing Agents, Psychotropic Drugs,	No	No
Propantheline	<1.00E-16	3	Anti-Ulcer Agents, Cholinergic Agents, Cholinergic Antagonists, Gastrointestinal Agents, Muscarinic Antagonists, Neurotransmitter Agents,	No	No
Protriptyline	<1.00E-16	2	Adrenergic Agents, Adrenergic Uptake Inhibitors, Antidepressive Agents, Antidepressive Agents, Tricyclic, Central Nervous System Agents, Neurotransmitter Agents, Neurotransmitter Uptake Inhibitors, Psychotropic Drugs,	No	No
Psoralens	<1.00E-16	9	Dermatologic Agents, Photosensitizing Agents, Radiation-Sensitizing Agents,	No	No
Pyridoxal	<1.00E-16	141	Micronutrients, Growth Substances, Vitamin B Complex, Vitamins,	No	No
Pyrithione	<1.00E-16	12	Anti-Infective Agents, Antifungal Agents,	No	No
Rasburicase	<1.00E-16	2	Antirheumatic Agents, Gout Suppressants,	No	No
Repaglinide	<1.00E-16	3	Hypoglycemic Agents,	No	No
Reproterol	<1.00E-16	2	Adrenergic Agents, Adrenergic Agonists, Adrenergic beta-Agonists, Anti-Asthmatic Agents, Autonomic Agents, Bronchodilator Agents, Peripheral Nervous System Agents, Neurotransmitter Agents, Respiratory System Agents,	No	No
Rimiterol	<1.00E-16	2	Adrenergic Agents, Adrenergic Agonists, Adrenergic beta-Agonists, Neurotransmitter Agents,	No	No
Ritodrine	<1.00E-16	9	Adrenergic Agents, Adrenergic Agonists, Adrenergic beta-Agonists, Autonomic Agents, Peripheral Nervous System Agents, Neurotransmitter Agents, Sympathomimetics, Tocolytic Agents, Reproductive Control Agents,	No	No
Rofecoxib	<1.00E-16	233	Analgesics, Analgesics, Non-Narcotic, Anti-Inflammatory Agents, Non-Steroidal, Anti-Inflammatory Agents, Cyclooxygenase 2 Inhibitors, Cyclooxygenase Inhibitors, Enzyme Inhibitors, Peripheral Nervous System Agents, Sensory System Agents,	No	No
Rosiglitazone	<1.00E-16	226	Hypoglycemic Agents,	No	No
Salicylic Acid	<1.00E-16	158	Anti-Infective Agents, Antifungal Agents, Dermatologic Agents, Keratolytic Agents,	No	No
Secobarbital	<1.00E-16	11	Adjuvants, Anesthesia, Central Nervous System Depressants, Central Nervous System Agents, GABA Agents, GABA Modulators, Hypnotics and Sedatives, Neurotransmitter Agents,	No	No
Sibutramine	<1.00E-16	5	Antidepressive Agents, Anti-Obesity Agents, Appetite Depressants, Central Nervous System Agents, Psychotropic Drugs,	No	No
Singlet Oxygen	<1.00E-16	6	Noxae, Oxidants,	No	No
Sitagliptin	<1.00E-16	2	Dipeptidyl-Peptidase IV Inhibitors, Enzyme Inhibitors, Protease Inhibitors,	No	No
Sorbitol	<1.00E-16	432	Cathartics, Flavoring Agents, Food Additives, Gastrointestinal Agents, Indicators and Reagents, Sweetening Agents,	No	No
Sulconazole	<1.00E-16	3	Anti-Infective Agents, Antifungal Agents,	No	No
Sulfisoxazole	<1.00E-16	5	Anti-Infective Agents,	No	No
Suprofen	<1.00E-16	6	Analgesics, Analgesics, Non-Narcotic, Anti-Inflammatory Agents, Non-Steroidal, Anti-Inflammatory Agents, Antirheumatic Agents, Cyclooxygenase Inhibitors, Enzyme Inhibitors, Peripheral Nervous System Agents, Sensory System Agents,	No	No
Tegaserod	<1.00E-16	119	Neurotransmitter Agents, Serotonin Agents, Serotonin Agonists,	No	No
Temozolomide	<1.00E-16	205	Alkylating Agents, Antineoplastic Agents, Alkylating, Antineoplastic Agents, Noxae,	No	No
Terconazole	<1.00E-16	3	Anti-Infective Agents, Antifungal Agents,	No	No
Tilmicosin	<1.00E-16	2	Anti-Bacterial Agents, Anti-Infective Agents,	No	No
Tinzaparin	<1.00E-16	2	Cardiovascular Agents, Fibrinolytic Agents, Fibrin Modulating Agents, Hematologic Agents,	No	No
Tiotropium	<1.00E-16	6	Anti-Asthmatic Agents, Autonomic Agents, Bronchodilator Agents, Cholinergic Agents, Cholinergic Antagonists, Parasympatholytics, Peripheral Nervous System Agents, Neurotransmitter Agents, Respiratory System Agents,	No	No
Tirofiban	<1.00E-16	7	Cardiovascular Agents, Fibrinolytic Agents, Fibrin Modulating Agents, Hematologic Agents, Platelet Aggregation Inhibitors,	No	No
Tizanidine	<1.00E-16	3	Adrenergic Agents, Adrenergic Agonists, Adrenergic alpha-Agonists, Analgesics, Anticonvulsants, Autonomic Agents, Central Nervous System Agents, Muscle Relaxants, Central, Parasympatholytics, Neuromuscular Agents, Peripheral Nervous System Agents, Neurotransmitter Agents, Sensory System Agents,	No	No
Tocainide	<1.00E-16	2	Anti-Arrhythmia Agents, Cardiovascular Agents, Membrane Transport Modulators, Sodium Channel Blockers,	No	No
Tolcapone	<1.00E-16	2	Anti-Dyskinesia Agents, Antiparkinson Agents, Central Nervous System Agents, Enzyme Inhibitors,	No	No
Tolnaftate	<1.00E-16	2	Anti-Infective Agents, Antifungal Agents,	No	No
Topiramate	<1.00E-16	74	Anticonvulsants, Anti-Obesity Agents, Central Nervous System Agents, Protective Agents, Neuroprotective Agents,	No	No
Trazodone	<1.00E-16	7	Anti-Anxiety Agents, Antidepressive Agents, Antidepressive Agents, Second-Generation, Central Nervous System Depressants, Central Nervous System Agents, Neurotransmitter Agents, Neurotransmitter Uptake Inhibitors, Serotonin Agents, Serotonin Uptake Inhibitors, Tranquilizing Agents, Psychotropic Drugs,	No	No
Treprostinil	<1.00E-16	4	Antihypertensive Agents, Cardiovascular Agents,	No	No
Triamcinolone	<1.00E-16	117	Adrenal Cortex Hormones, Anti-Inflammatory Agents, Hormones, Hormone Substitutes, and Hormone Antagonists, Hormones, Glucocorticoids,	No	No
Triamterene	<1.00E-16	8	Diuretics, Natriuretic Agents,	No	No
Trichlormethiazide	<1.00E-16	3	Antihypertensive Agents, Cardiovascular Agents, Diuretics, Membrane Transport Modulators, Natriuretic Agents, Sodium Chloride Symporter Inhibitors,	No	No
Tripelennamine	<1.00E-16	4	Anti-Allergic Agents, Histamine Agents, Histamine Antagonists, Histamine H1 Antagonists, Neurotransmitter Agents,	No	No
Triprolidine	<1.00E-16	2	Anti-Allergic Agents, Histamine Agents, Histamine Antagonists, Histamine H1 Antagonists, Neurotransmitter Agents,	No	No
Troglitazone	<1.00E-16	226	Hypoglycemic Agents,	No	No
Troleandomycin	<1.00E-16	7	Anti-Bacterial Agents, Anti-Infective Agents,	No	No
Tropicamide	<1.00E-16	4	Autonomic Agents, Cholinergic Agents, Cholinergic Antagonists, Muscarinic Antagonists, Mydriatics, Peripheral Nervous System Agents, Neurotransmitter Agents,	No	No
Valganciclovir	<1.00E-16	4	Anti-Infective Agents, Antiviral Agents,	No	No
Venoms	<1.00E-16	6	Noxae, Poisons,	No	No
Zafirlukast	<1.00E-16	6	Anti-Asthmatic Agents, Hormones, Hormone Substitutes, and Hormone Antagonists, Hormone Antagonists, Leukotriene Antagonists, Respiratory System Agents,	No	No
Zaleplon	<1.00E-16	3	Anticonvulsants, Central Nervous System Agents, Central Nervous System Depressants, Hypnotics and Sedatives,	No	No
Zanamivir	<1.00E-16	3	Anti-Infective Agents, Antiviral Agents, Enzyme Inhibitors,	No	No
Zinc Oxide	<1.00E-16	9	Cosmetics, Dermatologic Agents, Protective Agents, Sunscreening Agents, Radiation-Protective Agents,	No	No
Ketoconazole	<1.00E-16	98	Anti-Infective Agents, Antifungal Agents,	Yes	No
Thioguanine	<1.00E-16	156	Antimetabolites, Antimetabolites, Antineoplastic, Antineoplastic Agents, Noxae,	Yes	No
Polyethylene Glycols	<1.00E-16	419	Drug Carriers, Solvents, Surface-Active Agents,	Yes	No
Dobutamine	<1.00E-16	102	Adrenergic Agonists, Adrenergic Agents, Adrenergic beta-Agonists, Autonomic Agents, Cardiotonic Agents, Cardiovascular Agents, Protective Agents, Peripheral Nervous System Agents, Neurotransmitter Agents, Sympathomimetics,	No	No
Vinblastine	<1.00E-16	571	Antimitotic Agents, Antineoplastic Agents, Antineoplastic Agents, Phytogenic, Mitosis Modulators, Tubulin Modulators,	Yes	Yes
Propidium	<1.00E-16	208	Coloring Agents, Indicators and Reagents, Intercalating Agents,	Yes	No
Metoprolol	<1.00E-16	113	Adrenergic Agents, Adrenergic Antagonists, Adrenergic beta-Antagonists, Anti-Arrhythmia Agents, Antihypertensive Agents, Autonomic Agents, Cardiovascular Agents, Peripheral Nervous System Agents, Neurotransmitter Agents, Sympatholytics,	No	No
Naproxen	<1.00E-16	121	Analgesics, Analgesics, Non-Narcotic, Anti-Inflammatory Agents, Non-Steroidal, Anti-Inflammatory Agents, Antirheumatic Agents, Cyclooxygenase Inhibitors, Enzyme Inhibitors, Peripheral Nervous System Agents, Gout Suppressants, Sensory System Agents,	No	No
Lamotrigine	<1.00E-16	103	Anticonvulsants, Cardiovascular Agents, Calcium Channel Blockers, Central Nervous System Agents, Membrane Transport Modulators,	No	No
Mannitol	<1.00E-16	418	Diuretics, Diuretics, Osmotic, Flavoring Agents, Food Additives, Natriuretic Agents, Sweetening Agents,	Yes	No
Aprotinin	<1.00E-16	109	Coagulants, Enzyme Inhibitors, Protease Inhibitors, Hematologic Agents, Hemostatics, Serine Proteinase Inhibitors, Trypsin Inhibitors,	Yes	No
Propranolol	<1.00E-16	721	Adrenergic Agents, Adrenergic Antagonists, Adrenergic beta-Antagonists, Anti-Arrhythmia Agents, Antihypertensive Agents, Cardiovascular Agents, Neurotransmitter Agents, Vasodilator Agents,	Yes	No
Staurosporine	<1.00E-16	1719	Enzyme Inhibitors,	Yes	No
Streptokinase	<1.00E-16	68	Cardiovascular Agents, Fibrinolytic Agents, Fibrin Modulating Agents, Hematologic Agents,	Yes	No
Thyrotropin-Releasing Hormone	<1.00E-16	544	Hormones, Hormone Substitutes, and Hormone Antagonists, Hormones,	Yes	No
Immunoglobulins	<1.00E-16	1062	Immunologic Factors,	Yes	No
Cladribine	<1.00E-16	52	Antineoplastic Agents, Immunologic Factors, Immunosuppressive Agents,	Yes	No
Indomethacin	<1.00E-16	1032	Analgesics, Analgesics, Non-Narcotic, Anti-Inflammatory Agents, Non-Steroidal, Anti-Inflammatory Agents, Antirheumatic Agents, Cardiovascular Agents, Cyclooxygenase Inhibitors, Enzyme Inhibitors, Peripheral Nervous System Agents, Tocolytic Agents, Gout Suppressants, Reproductive Control Agents, Sensory System Agents,	Yes	No
Secretin	<1.00E-16	144	Gastrointestinal Agents, Hormones, Hormone Substitutes, and Hormone Antagonists, Hormones,	No	No
Phenytoin	<1.00E-16	187	Anticonvulsants, Central Nervous System Agents,	Yes	No
Simvastatin	<1.00E-16	219	Anticholesteremic Agents, Antilipemic Agents, Antimetabolites, Enzyme Inhibitors, Hydroxymethylglutaryl-CoA Reductase Inhibitors,	Yes	No
Camptothecin	<1.00E-16	1292	Antineoplastic Agents, Antineoplastic Agents, Phytogenic, Enzyme Inhibitors,	Yes	No
Diphenhydramine	<1.00E-16	36	Anesthetics, Anesthetics, Local, Anti-Allergic Agents, Antiemetics, Autonomic Agents, Central Nervous System Agents, Central Nervous System Depressants, Gastrointestinal Agents, Hypnotics and Sedatives, Peripheral Nervous System Agents, Histamine Agents, Neurotransmitter Agents, Histamine Antagonists, Histamine H1 Antagonists, Sensory System Agents,	Yes	No
Pyrilamine	<1.00E-16	35	Anti-Allergic Agents, Histamine Agents, Histamine Antagonists, Histamine H1 Antagonists, Neurotransmitter Agents,	No	No
Clozapine	<1.00E-16	152	Antipsychotic Agents, Central Nervous System Agents, Central Nervous System Depressants, GABA Agents, GABA Antagonists, Neurotransmitter Agents, Serotonin Agents, Serotonin Antagonists, Tranquilizing Agents, Psychotropic Drugs,	No	No
Apomorphine	<1.00E-16	124	Anti-Dyskinesia Agents, Antiparkinson Agents, Central Nervous System Agents, Dopamine Agents, Dopamine Agonists, Neurotransmitter Agents,	Yes	No
Enalapril	<1.00E-16	79	Angiotensin-Converting Enzyme Inhibitors, Antihypertensive Agents, Cardiovascular Agents, Enzyme Inhibitors, Protease Inhibitors,	Yes	No
Betaine	<1.00E-16	82	Antilipemic Agents, Antimetabolites, Gastrointestinal Agents, Lipotropic Agents,	No	No
Atenolol	<1.00E-16	92	Adrenergic Agents, Adrenergic Antagonists, Adrenergic beta-Antagonists, Anti-Arrhythmia Agents, Antihypertensive Agents, Autonomic Agents, Cardiovascular Agents, Peripheral Nervous System Agents, Neurotransmitter Agents, Sympatholytics,	No	No
Bosentan	<1.00E-16	28	Antihypertensive Agents, Cardiovascular Agents,	No	No
Cortisone	<1.00E-16	122	Anti-Inflammatory Agents,	Yes	No
Streptozocin	<1.00E-16	134	Antibiotics, Antineoplastic, Antineoplastic Agents,	Yes	No
Immunoglobulin M	<1.00E-16	1159	Immunologic Factors,	Yes	No
Dipyridamole	<1.00E-16	94	Cardiovascular Agents, Enzyme Inhibitors, Hematologic Agents, Phosphodiesterase Inhibitors, Platelet Aggregation Inhibitors, Vasodilator Agents,	Yes	No
1-(5-Isoquinolinesulfonyl)-2-Methylpiperazine	<1.00E-16	261	Enzyme Inhibitors,	Yes	No
Glycine	<1.00E-16	484	Neurotransmitter Agents, Glycine Agents,	Yes	No
Leucovorin	<1.00E-16	127	Micronutrients, Growth Substances, Vitamin B Complex, Vitamins,	Yes	No
Interleukin-4	<1.00E-16	1524	Adjuvants, Immunologic, Antineoplastic Agents, Antirheumatic Agents, Immunologic Factors,	Yes	No
Cholecystokinin	<1.00E-16	147	Cholagogues and Choleretics, Gastrointestinal Agents,	Yes	No
Aminolevulinic Acid	<1.00E-16	102	Dermatologic Agents, Photosensitizing Agents, Radiation-Sensitizing Agents,	Yes	No
Sildenafil	<1.00E-16	61	Cardiovascular Agents, Enzyme Inhibitors, Phosphodiesterase Inhibitors, Vasodilator Agents,	No	No
Follicle Stimulating Hormone	<1.00E-16	1058	Hormones, Hormones, Hormone Substitutes, and Hormone Antagonists,	Yes	No
Tetrachlorodibenzodioxin	<1.00E-16	837	Environmental Pollutants, Noxae, Teratogens,	Yes	No
Candesartan	<1.00E-16	74	Angiotensin II Type 1 Receptor Blockers, Antihypertensive Agents, Cardiovascular Agents,	No	No
Tretinoin	<1.00E-16	2026	Antineoplastic Agents, Dermatologic Agents, Keratolytic Agents,	Yes	No
Novobiocin	<1.00E-16	101	Anti-Infective Agents, Anti-Bacterial Agents, Enzyme Inhibitors, Nucleic Acid Synthesis Inhibitors,	Yes	No
Salmon Calcitonin	<1.00E-16	22	Bone Density Conservation Agents,	No	No
Rifampin	<1.00E-16	110	Anti-Bacterial Agents, Anti-Infective Agents, Antibiotics, Antitubercular, Antitubercular Agents, Enzyme Inhibitors, Nucleic Acid Synthesis Inhibitors, Leprostatic Agents,	Yes	No
Citric Acid	<1.00E-16	174	Anticoagulants, Chelating Agents, Hematologic Agents,	Yes	No
Dextromethorphan	<1.00E-16	31	Antitussive Agents, Central Nervous System Agents, Excitatory Amino Acid Agents, Excitatory Amino Acid Antagonists, Neurotransmitter Agents, Respiratory System Agents,	No	No
Substance P	<1.00E-16	298	Neurotransmitter Agents,	Yes	No
Procainamide	<1.00E-16	40	Anti-Arrhythmia Agents, Cardiovascular Agents,	No	No
Bombesin	<1.00E-16	190	Neurotransmitter Agents,	Yes	No
Arginine Vasopressin	<1.00E-16	172	Antidiuretic Agents, Cardiovascular Agents, Coagulants, Natriuretic Agents, Hematologic Agents, Hemostatics, Vasoconstrictor Agents,	Yes	No
6-Mercaptopurine	<1.00E-16	65	Antimetabolites, Antimetabolites, Antineoplastic, Antineoplastic Agents, Enzyme Inhibitors, Noxae, Nucleic Acid Synthesis Inhibitors, Immunologic Factors, Immunosuppressive Agents,	Yes	No
Bromodeoxyuridine	<1.00E-16	771	Anti-Infective Agents, Antimetabolites, Antimetabolites, Antineoplastic, Antineoplastic Agents, Antiviral Agents, Noxae, Radiation-Sensitizing Agents,	Yes	No
Tyrphostins	<1.00E-16	662	Antineoplastic Agents, Enzyme Inhibitors,	Yes	No
Carmustine	<1.00E-16	188	Alkylating Agents, Antineoplastic Agents, Antineoplastic Agents, Alkylating, Noxae,	Yes	No
Fluoroquinolones	<1.00E-16	430	Anti-Bacterial Agents, Anti-Infective Agents, Enzyme Inhibitors, Nucleic Acid Synthesis Inhibitors,	No	No
Kaolin	<1.00E-16	38	Antidiarrheals, Gastrointestinal Agents,	No	No
Clomiphene	<1.00E-16	52	Estrogen Receptor Modulators, Estrogen Antagonists, Fertility Agents, Fertility Agents, Female, Hormone Antagonists, Hormones, Hormone Substitutes, and Hormone Antagonists, Reproductive Control Agents, Selective Estrogen Receptor Modulators,	Yes	No
Hydrocortisone	<1.00E-16	877	Anti-Inflammatory Agents,	Yes	No
Warfarin	<1.00E-16	127	Anticoagulants, Hematologic Agents, Pesticides, Rodenticides,	Yes	No
Immunoglobulin A	<1.00E-16	428	Immunologic Factors,	Yes	No
Dasatinib	<1.00E-16	73	Enzyme Inhibitors, Protein Kinase Inhibitors,	No	No
Plasminogen Activator Inhibitor 1	<1.00E-16	1522	Enzyme Inhibitors, Protease Inhibitors, Serine Proteinase Inhibitors,	Yes	No
Mycophenolate Mofetil	<1.00E-16	108	Immunologic Factors, Immunosuppressive Agents,	No	No
Pituitary Adenylate Cyclase-Activating Polypeptide	<1.00E-16	81	Cardiovascular Agents, Growth Substances, Neurotransmitter Agents, Vasodilator Agents,	No	No
Melphalan	<1.00E-16	356	Alkylating Agents, Antineoplastic Agents, Alkylating, Antineoplastic Agents, Noxae, Myeloablative Agonists, Immunologic Factors, Immunosuppressive Agents,	Yes	No
Phenol	<1.00E-16	520	Anti-Infective Agents, Anti-Infective Agents, Local, Cardiovascular Agents, Disinfectants, Pharmaceutical Solutions, Sclerosing Solutions,	No	No
Sulfasalazine	<1.00E-16	86	Analgesics, Analgesics, Non-Narcotic, Anti-Inflammatory Agents, Non-Steroidal, Anti-Infective Agents, Anti-Inflammatory Agents, Antirheumatic Agents, Peripheral Nervous System Agents, Gastrointestinal Agents, Sensory System Agents,	No	No
Quinidine	<1.00E-16	94	Adrenergic Agents, Adrenergic alpha-Antagonists, Adrenergic Antagonists, Anti-Arrhythmia Agents, Anti-Infective Agents, Antimalarials, Antiparasitic Agents, Antiprotozoal Agents, Cardiovascular Agents, Cholinergic Agents, Cholinergic Antagonists, Enzyme Inhibitors, Muscarinic Antagonists, Neurotransmitter Agents,	Yes	No
Beta Carotene	<1.00E-16	142	Micronutrients, Growth Substances, Vitamins,	Yes	No
Amifostine	<1.00E-16	49	Protective Agents, Radiation-Protective Agents,	Yes	No
Mycotoxins	<1.00E-16	188	Noxae, Poisons,	Yes	No
Isoniazid	<1.00E-16	46	Anti-Bacterial Agents, Anti-Infective Agents, Antilipemic Agents, Antimetabolites, Antitubercular Agents, Fatty Acid Synthesis Inhibitors,	Yes	No
Vitamin B 12	<1.00E-16	54	Micronutrients, Growth Substances, Vitamin B Complex, Vitamins,	Yes	No
Molybdenum	<1.00E-16	182	Micronutrients, Growth Substances, Trace Elements,	Yes	No
Immunoglobulin Fab Fragments	<1.00E-16	395	Immunologic Factors,	Yes	No
Calcimycin	<1.00E-16	450	Anti-Bacterial Agents, Anti-Infective Agents, Membrane Transport Modulators, Ionophores,	Yes	No
Dibucaine	<1.00E-16	35	Anesthetics, Anesthetics, Local, Central Nervous System Agents, Central Nervous System Depressants, Peripheral Nervous System Agents, Sensory System Agents,	No	No
Interleukin-2	<1.00E-16	3272	Analgesics, Analgesics, Non-Narcotic, Antineoplastic Agents, Central Nervous System Agents, Peripheral Nervous System Agents, Sensory System Agents,	Yes	No
Vasoactive Intestinal Peptide	<1.00E-16	213	Cardiovascular Agents, Central Nervous System Agents, Protective Agents, Neuroprotective Agents, Gastrointestinal Agents, Vasodilator Agents,	Yes	No
Irbesartan	<1.00E-16	43	Angiotensin II Type 1 Receptor Blockers, Antihypertensive Agents, Cardiovascular Agents,	No	No
Calcitonin	<1.00E-16	59	Bone Density Conservation Agents,	Yes	No
Procaine	<1.00E-16	62	Anesthetics, Anesthetics, Local, Central Nervous System Depressants, Central Nervous System Agents, Peripheral Nervous System Agents, Sensory System Agents,	No	No
Ethanol	<1.00E-16	2494	Anti-Infective Agents, Anti-Infective Agents, Local, Central Nervous System Agents, Central Nervous System Depressants, Solvents,	Yes	No
Pyrimethamine	<1.00E-16	28	Anti-Infective Agents, Antimalarials, Antiparasitic Agents, Antiprotozoal Agents, Enzyme Inhibitors, Folic Acid Antagonists,	No	No
Caseins	<1.00E-16	351	Chelating Agents,	Yes	No
Infliximab	<1.00E-16	84	Anti-Inflammatory Agents, Antirheumatic Agents, Dermatologic Agents, Gastrointestinal Agents,	No	No
Alprostadil	<1.00E-16	75	Cardiovascular Agents, Fibrinolytic Agents, Fibrin Modulating Agents, Hematologic Agents, Platelet Aggregation Inhibitors, Vasodilator Agents,	Yes	No
Moxifloxacin	<1.00E-16	132	Anti-Infective Agents,	No	No
Lisinopril	<1.00E-16	38	Angiotensin-Converting Enzyme Inhibitors, Antihypertensive Agents, Cardiotonic Agents, Cardiovascular Agents, Enzyme Inhibitors, Protease Inhibitors, Protective Agents,	No	No
Risperidone	<1.00E-16	66	Antipsychotic Agents, Central Nervous System Depressants, Central Nervous System Agents, Dopamine Agents, Dopamine Antagonists, Neurotransmitter Agents, Serotonin Agents, Serotonin Antagonists, Tranquilizing Agents, Psychotropic Drugs,	No	No
Fluvastatin	<1.00E-16	60	Anticholesteremic Agents, Antilipemic Agents, Antimetabolites, Enzyme Inhibitors, Hydroxymethylglutaryl-CoA Reductase Inhibitors,	No	No
Sulpiride	<1.00E-16	49	Antidepressive Agents, Antidepressive Agents, Second-Generation, Antipsychotic Agents, Central Nervous System Depressants, Central Nervous System Agents, Dopamine Agents, Dopamine Antagonists, Neurotransmitter Agents, Tranquilizing Agents, Psychotropic Drugs,	Yes	No
Allopurinol	<1.00E-16	119	Antimetabolites, Antioxidants, Antirheumatic Agents, Enzyme Inhibitors, Free Radical Scavengers, Noxae, Gout Suppressants,	Yes	No
Terbutaline	<1.00E-16	74	Adrenergic Agents, Adrenergic Agonists, Adrenergic beta-Agonists, Anti-Asthmatic Agents, Autonomic Agents, Bronchodilator Agents, Peripheral Nervous System Agents, Neurotransmitter Agents, Sympathomimetics, Tocolytic Agents, Reproductive Control Agents, Respiratory System Agents,	No	No
Niacinamide	<1.00E-16	105	Micronutrients, Growth Substances, Vitamin B Complex, Vitamins,	Yes	No
Valproic Acid	<1.00E-16	234	Anticonvulsants, Antimanic Agents, Central Nervous System Depressants, Central Nervous System Agents, Enzyme Inhibitors, GABA Agents, Neurotransmitter Agents, Tranquilizing Agents, Psychotropic Drugs,	Yes	No
Ouabain	<1.00E-16	458	Cardiotonic Agents, Cardiovascular Agents, Enzyme Inhibitors, Protective Agents,	Yes	No
Gastrins	<1.00E-16	163	Hormones, Hormones, Hormone Substitutes, and Hormone Antagonists,	Yes	No
Cytochalasin D	<1.00E-16	329	Enzyme Inhibitors, Nucleic Acid Synthesis Inhibitors,	Yes	No
Metformin	<1.00E-16	150	Hypoglycemic Agents,	Yes	No
Glucagon-Like Peptide 1	<1.00E-16	42	Incretins, Hormones, Hormones, Hormone Substitutes, and Hormone Antagonists,	No	No
Omeprazole	<1.00E-16	162	Anti-Ulcer Agents, Enzyme Inhibitors, Gastrointestinal Agents,	Yes	No
Methysergide	<1.00E-16	160	Cardiovascular Agents, Neurotransmitter Agents, Serotonin Agents, Serotonin Antagonists, Vasoconstrictor Agents,	No	No
Cholera Toxin	<1.00E-16	242	Adjuvants, Immunologic, Noxae, Immunologic Factors, Poisons,	Yes	No
Thromboplastin	<1.00E-16	225	Coagulants, Hematologic Agents, Hemostatics,	Yes	No
Atorvastatin	<1.00E-16	151	Anticholesteremic Agents, Antilipemic Agents, Antimetabolites, Enzyme Inhibitors, Hydroxymethylglutaryl-CoA Reductase Inhibitors,	No	No
Probenecid	<1.00E-16	45	Adjuvants, Pharmaceutic, Antirheumatic Agents, Pharmaceutic Aids, Gout Suppressants, Uricosuric Agents, Renal Agents,	No	No
Glucose	<1.00E-16	11260	Flavoring Agents, Food Additives, Sweetening Agents,	Yes	No
Okadaic Acid	<1.00E-16	742	Carcinogens, Enzyme Inhibitors, Membrane Transport Modulators, Noxae, Ionophores,	Yes	No
Olanzapine	<1.00E-16	63	Antiemetics, Autonomic Agents, Antipsychotic Agents, Central Nervous System Agents, Central Nervous System Depressants, Gastrointestinal Agents, Peripheral Nervous System Agents, Neurotransmitter Agents, Neurotransmitter Uptake Inhibitors, Serotonin Agents, Serotonin Uptake Inhibitors, Tranquilizing Agents, Psychotropic Drugs,	No	No
Lindane	<1.00E-16	57	Pesticides, Insecticides,	Yes	No
Selegiline	<1.00E-16	24	Anti-Dyskinesia Agents, Antiparkinson Agents, Central Nervous System Agents, Enzyme Inhibitors, Monoamine Oxidase Inhibitors, Protective Agents, Neuroprotective Agents,	No	No
Dimethyl Sulfoxide	<1.00E-16	556	Antioxidants, Cryoprotective Agents, Free Radical Scavengers, Protective Agents, Solvents,	Yes	No
Mitoxantrone	<1.00E-16	251	Analgesics, Antineoplastic Agents, Central Nervous System Agents, Peripheral Nervous System Agents, Sensory System Agents,	Yes	No
Oxytetracycline	<1.00E-16	20	Anti-Infective Agents, Anti-Bacterial Agents,	No	No
Pancreatin	<1.00E-16	19	Gastrointestinal Agents,	No	No
Pentoxifylline	<1.00E-16	89	Antioxidants, Cardiovascular Agents, Enzyme Inhibitors, Free Radical Scavengers, Protective Agents, Hematologic Agents, Phosphodiesterase Inhibitors, Platelet Aggregation Inhibitors, Radiation-Protective Agents, Vasodilator Agents,	Yes	No
Teniposide	<1.00E-16	102	Antineoplastic Agents, Enzyme Inhibitors, Nucleic Acid Synthesis Inhibitors,	Yes	No
Dapsone	<1.00E-16	18	Anti-Bacterial Agents, Anti-Infective Agents, Antimalarials, Antiparasitic Agents, Antiprotozoal Agents, Enzyme Inhibitors, Folic Acid Antagonists, Leprostatic Agents,	No	No
Kanamycin	<1.00E-16	155	Anti-Bacterial Agents, Anti-Infective Agents, Enzyme Inhibitors, Protein Synthesis Inhibitors,	No	No
Penicillin G	<1.00E-16	200	Anti-Infective Agents, Anti-Bacterial Agents,	No	No
Codeine	<1.00E-16	33	Analgesics, Analgesics, Opioid, Antitussive Agents, Central Nervous System Agents, Central Nervous System Depressants, Narcotics, Peripheral Nervous System Agents, Respiratory System Agents, Sensory System Agents,	Yes	No
Baclofen	<1.00E-16	81	Central Nervous System Agents, GABA Agents, GABA Agonists, Muscle Relaxants, Central, Peripheral Nervous System Agents, Neuromuscular Agents, Neurotransmitter Agents,	No	No
Rituximab	<1.00E-16	174	Antineoplastic Agents, Antirheumatic Agents, Immunologic Factors,	No	No
1-Methyl-3-Isobutylxanthine	<1.00E-16	127	Enzyme Inhibitors, Phosphodiesterase Inhibitors,	Yes	No
Naltrexone	<1.00E-16	64	Central Nervous System Agents, Narcotic Antagonists, Peripheral Nervous System Agents, Sensory System Agents,	No	No
Methylprednisolone	<1.00E-16	191	Adrenal Cortex Hormones, Anti-Inflammatory Agents, Antiemetics, Autonomic Agents, Central Nervous System Agents, Gastrointestinal Agents, Hormones, Hormone Substitutes, and Hormone Antagonists, Protective Agents, Neuroprotective Agents, Peripheral Nervous System Agents, Hormones, Glucocorticoids,	Yes	No
Tricalcium Phosphate	<1.00E-16	142	Biocompatible Materials,	No	No
Bortezomib	<1.00E-16	232	Antineoplastic Agents, Enzyme Inhibitors, Protease Inhibitors,	No	No
Interferon Alfa-2B	<1.00E-16	71	Angiogenesis Inhibitors, Angiogenesis Modulating Agents, Anti-Infective Agents, Antineoplastic Agents, Antiviral Agents, Growth Substances, Growth Inhibitors,	Yes	No
Amphotericin B	<1.00E-16	119	Amebicides, Anti-Bacterial Agents, Anti-Infective Agents, Antifungal Agents, Antiparasitic Agents, Antiprotozoal Agents,	Yes	No
Kainic Acid	<1.00E-16	227	Anthelmintics, Anti-Infective Agents, Antinematodal Agents, Antiparasitic Agents, Excitatory Amino Acid Agents, Excitatory Amino Acid Agonists, Neurotransmitter Agents,	No	No
Prednisone	<1.00E-16	538	Adrenal Cortex Hormones, Anti-Inflammatory Agents, Antineoplastic Agents, Hormonal, Antineoplastic Agents, Hormones, Hormone Substitutes, and Hormone Antagonists, Hormones, Glucocorticoids,	Yes	No
Chlorpheniramine	<1.00E-16	28	Anti-Allergic Agents, Antipruritics, Dermatologic Agents, Neurotransmitter Agents, Histamine Agents, Histamine Antagonists, Histamine H1 Antagonists,	No	No
Oncostatin M	<1.00E-16	165	Antineoplastic Agents, Growth Substances, Growth Inhibitors,	Yes	No
Durapatite	<1.00E-16	839	Biocompatible Materials,	Yes	No
Iloprost	<1.00E-16	27	Cardiovascular Agents, Hematologic Agents, Platelet Aggregation Inhibitors, Vasodilator Agents,	No	No
Phenobarbital	<1.00E-16	528	Anticonvulsants, Central Nervous System Depressants, Central Nervous System Agents, GABA Agents, GABA Modulators, Excitatory Amino Acid Agents, Excitatory Amino Acid Antagonists, Hypnotics and Sedatives, Neurotransmitter Agents,	Yes	No
N-Methylaspartate	<1.00E-16	194	Excitatory Amino Acid Agents, Excitatory Amino Acid Agonists, Neurotransmitter Agents,	No	No
Levodopa	<1.00E-16	147	Anti-Dyskinesia Agents, Antiparkinson Agents, Central Nervous System Agents, Dopamine Agents, Neurotransmitter Agents,	Yes	No
Iodized Oil	<1.00E-16	140	Contrast Media,	Yes	No
Indoleacetic Acids	<1.00E-16	171	Growth Substances, Plant Growth Regulators,	No	No
Ethambutol	<1.00E-16	13	Anti-Bacterial Agents, Anti-Infective Agents, Antitubercular Agents,	No	No
Indocyanine Green	<1.00E-16	116	Coloring Agents,	Yes	No
Flutamide	<1.00E-16	220	Androgen Antagonists, Antineoplastic Agents, Antineoplastic Agents, Hormonal, Hormone Antagonists, Hormones, Hormone Substitutes, and Hormone Antagonists,	Yes	No
Fluticasone	<1.00E-16	83	Anti-Allergic Agents, Anti-Asthmatic Agents, Anti-Inflammatory Agents, Autonomic Agents, Bronchodilator Agents, Dermatologic Agents, Peripheral Nervous System Agents, Respiratory System Agents,	No	No
Hydroxyurea	<1.00E-16	957	Antineoplastic Agents, Antisickling Agents, Enzyme Inhibitors, Nucleic Acid Synthesis Inhibitors, Hematologic Agents,	Yes	No
Ramipril	<1.00E-16	20	Angiotensin-Converting Enzyme Inhibitors, Antihypertensive Agents, Cardiovascular Agents, Enzyme Inhibitors, Protease Inhibitors,	No	No
Enkephalins	<1.00E-16	156	Neurotransmitter Agents,	Yes	No
Promethazine	<1.00E-16	45	Anti-Allergic Agents, Antipruritics, Dermatologic Agents, Histamine Agents, Histamine Antagonists, Histamine H1 Antagonists, Neurotransmitter Agents,	Yes	No
Rose Bengal	<1.00E-16	84	Coloring Agents, Fluorescent Dyes, Luminescent Agents, Indicators and Reagents,	Yes	No
Amsacrine	<1.00E-16	110	Antineoplastic Agents, Indicators and Reagents, Intercalating Agents,	Yes	No
Oxcarbazepine	<1.00E-16	36	Anticonvulsants, Central Nervous System Agents,	No	No
Mechlorethamine	<1.00E-16	68	Alkylating Agents, Antineoplastic Agents, Alkylating, Antineoplastic Agents, Chemical Warfare Agents, Noxae, Irritants, Poisons, Riot Control Agents, Chemical,	Yes	No
Buserelin	<1.00E-16	41	Fertility Agents, Fertility Agents, Female, Reproductive Control Agents,	Yes	No
Interferon-Beta	<1.00E-16	604	Anti-Infective Agents, Antineoplastic Agents, Antiviral Agents, Immunologic Factors,	Yes	No
Concanavalin A	<1.00E-16	314	Mitogens, Mitosis Modulators,	Yes	No
Dizocilpine Maleate	<1.00E-16	119	Central Nervous System Agents, Excitatory Amino Acid Agents, Excitatory Amino Acid Antagonists, Protective Agents, Neuroprotective Agents, Neurotransmitter Agents,	No	No
Propofol	<1.00E-16	198	Anesthetics, Anesthetics, General, Anesthetics, Intravenous, Central Nervous System Depressants, Central Nervous System Agents, Hypnotics and Sedatives,	Yes	No
Vasopressins	<1.00E-16	227	Antidiuretic Agents, Cardiovascular Agents, Coagulants, Natriuretic Agents, Hematologic Agents, Hemostatics, Vasoconstrictor Agents,	Yes	No
Thiotepa	1.06e-16	44	Alkylating Agents, Antineoplastic Agents, Antineoplastic Agents, Alkylating, Noxae, Myeloablative Agonists, Immunologic Factors, Immunosuppressive Agents,	Yes	No
Bicarbonates	1.61e-16	142	Buffers,	Yes	No
Immunoconjugates	1.83e-16	121	Immunologic Factors,	Yes	No
Aclarubicin	1.9e-16	24	Antibiotics, Antineoplastic, Antineoplastic Agents,	Yes	No
Isosorbide Dinitrate	2.22e-16	48	Cardiovascular Agents, Nitric Oxide Donors, Vasodilator Agents,	No	No
Sevoflurane	3.03e-16	97	Anesthetics, Anesthetics, General, Anesthetics, Inhalation, Central Nervous System Depressants, Central Nervous System Agents, Hematologic Agents, Platelet Aggregation Inhibitors,	No	No
Folic Acid	3.09e-16	150	Micronutrients, Growth Substances, Hematinics, Hematologic Agents, Vitamin B Complex, Vitamins,	Yes	No
Desipramine	3.18e-16	103	Adrenergic Agents, Adrenergic Uptake Inhibitors, Antidepressive Agents, Antidepressive Agents, Tricyclic, Central Nervous System Agents, Enzyme Inhibitors, Neurotransmitter Agents, Neurotransmitter Uptake Inhibitors, Psychotropic Drugs,	No	No
Cholecalciferol	3.81e-16	108	Bone Density Conservation Agents, Micronutrients, Growth Substances, Vitamins,	Yes	No
Fluorodeoxyglucose F18	3.82e-16	61	Indicators and Reagents, Radiopharmaceuticals,	Yes	No
Phytohemagglutinins	4.68e-16	298	Mitogens, Mitosis Modulators,	Yes	No
Prednisolone	5.05e-16	362	Adrenal Cortex Hormones, Anti-Inflammatory Agents, Antineoplastic Agents, Hormonal, Antineoplastic Agents, Hormones, Hormone Substitutes, and Hormone Antagonists, Hormones, Glucocorticoids,	Yes	No
Tetrabenazine	5.74e-16	12	Adrenergic Agents, Adrenergic Uptake Inhibitors, Neurotransmitter Agents, Neurotransmitter Uptake Inhibitors,	No	No
Cyproterone	7.85e-16	131	Androgen Antagonists, Hormone Antagonists, Hormones, Hormone Substitutes, and Hormone Antagonists,	Yes	No
Riboflavin	9.8e-16	102	Dermatologic Agents, Micronutrients, Growth Substances, Photosensitizing Agents, Radiation-Sensitizing Agents, Vitamin B Complex, Vitamins,	Yes	No
Propylthiouracil	1.09e-15	67	Antimetabolites, Antithyroid Agents, Hormones, Hormone Substitutes, and Hormone Antagonists, Noxae, Hormone Antagonists,	Yes	No
Enalaprilat	1.36e-15	20	Angiotensin-Converting Enzyme Inhibitors, Antihypertensive Agents, Cardiovascular Agents, Enzyme Inhibitors, Protease Inhibitors,	No	No
Valsartan	1.9e-15	56	Antihypertensive Agents, Cardiovascular Agents,	No	No
Sparfloxacin	1.98e-15	76	Anti-Bacterial Agents, Anti-Infective Agents, Antitubercular Agents,	No	No
Pentamidine	2.02e-15	30	Anti-Infective Agents, Antifungal Agents, Antiparasitic Agents, Antiprotozoal Agents, Trypanocidal Agents,	No	No
Tetradecanoylphorbol Acetate	2.45e-15	5739	Carcinogens, Noxae,	Yes	No
Zileuton	2.93e-15	16	Analgesics, Analgesics, Non-Narcotic, Anti-Inflammatory Agents, Anti-Inflammatory Agents, Non-Steroidal, Antirheumatic Agents, Enzyme Inhibitors, Hormones, Hormone Substitutes, and Hormone Antagonists, Peripheral Nervous System Agents, Hormone Antagonists, Leukotriene Antagonists, Lipoxygenase Inhibitors, Sensory System Agents,	No	No
Carboplatin	3.95e-15	411	Antineoplastic Agents, Cross-Linking Reagents, Indicators and Reagents,	Yes	No
Carbidopa	4.32e-15	24	Anti-Dyskinesia Agents, Antiparkinson Agents, Central Nervous System Agents, Dopamine Agents, Enzyme Inhibitors, Neurotransmitter Agents,	No	No
Gtpase-Activating Proteins	5e-15	2089	Enzyme Activators, GTP Phosphohydrolase Activators,	Yes	No
Pepsin A	5.85e-15	207	Gastrointestinal Agents,	Yes	No
Isosorbide	8.54e-15	63	Diuretics, Diuretics, Osmotic, Natriuretic Agents,	No	No
Hexobarbital	8.77e-15	17	Central Nervous System Agents, Central Nervous System Depressants, GABA Agents, GABA Modulators, Hypnotics and Sedatives, Neurotransmitter Agents,	No	No
Fluorides	1.03e-14	262	Cariostatic Agents, Protective Agents,	Yes	No
Tobramycin	1.49e-14	54	Anti-Bacterial Agents, Anti-Infective Agents,	Yes	No
Digoxin	1.6e-14	175	Anti-Arrhythmia Agents, Cardiotonic Agents, Cardiovascular Agents, Enzyme Inhibitors, Protective Agents,	Yes	No
Methyl Methanesulfonate	4.45e-14	396	Alkylating Agents, Antineoplastic Agents, Alkylating, Antineoplastic Agents, Noxae, Mutagens,	Yes	No
Vindesine	4.7e-14	68	Antimitotic Agents, Antineoplastic Agents, Antineoplastic Agents, Phytogenic, Mitosis Modulators, Tubulin Modulators,	Yes	No
Rabeprazole	4.99e-14	17	Anti-Ulcer Agents, Enzyme Inhibitors, Gastrointestinal Agents,	No	No
Phenylhydrazine	5.16e-14	34	Noxae, Oxidants,	No	No
Brimonidine	5.44e-14	22	Adrenergic Agonists, Adrenergic alpha-Agonists, Adrenergic Agents, Antihypertensive Agents, Cardiovascular Agents, Neurotransmitter Agents,	No	No
Levamisole	6.86e-14	62	Adjuvants, Immunologic, Anthelmintics, Anti-Infective Agents, Antinematodal Agents, Antiparasitic Agents, Antirheumatic Agents, Immunologic Factors,	Yes	No
Minocycline	7.16e-14	73	Anti-Infective Agents, Anti-Bacterial Agents,	Yes	No
Dicumarol	8.04e-14	147	Anticoagulants, Enzyme Inhibitors, Hematologic Agents, Uncoupling Agents,	Yes	No
Complement C5A	8.04e-14	32	Immunologic Factors,	No	No
Tolbutamide	8.92e-14	66	Hypoglycemic Agents,	Yes	No
Loratadine	9.32e-14	15	Anti-Allergic Agents, Antipruritics, Dermatologic Agents, Histamine Agents, Histamine Antagonists, Neurotransmitter Agents, Histamine H1 Antagonists, Histamine H1 Antagonists, Non-Sedating,	No	No
Fosamprenavir	1.1e-13	11	Anti-Infective Agents, Anti-HIV Agents, Anti-Retroviral Agents, Antiviral Agents, Enzyme Inhibitors, Protease Inhibitors, HIV Protease Inhibitors,	No	No
Lithium Carbonate	1.2e-13	22	Antidepressive Agents, Antimanic Agents, Central Nervous System Agents, Central Nervous System Depressants, Enzyme Inhibitors, Tranquilizing Agents, Psychotropic Drugs,	Yes	No
Eptifibatide	1.46e-13	13	Hematologic Agents, Platelet Aggregation Inhibitors,	No	No
Amikacin	1.49e-13	60	Anti-Bacterial Agents, Anti-Infective Agents,	No	No
Alemtuzumab	1.61e-13	24	Antineoplastic Agents,	No	No
Fluconazole	1.72e-13	73	Anti-Infective Agents, Antifungal Agents,	Yes	No
Ibuprofen	1.99e-13	194	Analgesics, Analgesics, Non-Narcotic, Anti-Inflammatory Agents, Non-Steroidal, Anti-Inflammatory Agents, Antirheumatic Agents, Central Nervous System Agents, Cyclooxygenase Inhibitors, Enzyme Inhibitors, Peripheral Nervous System Agents, Sensory System Agents,	Yes	No
Cobalt	2.14e-13	264	Micronutrients, Growth Substances, Trace Elements,	Yes	No
Ofloxacin	2.18e-13	183	Anti-Infective Agents, Anti-Bacterial Agents, Anti-Infective Agents, Urinary, Enzyme Inhibitors, Nucleic Acid Synthesis Inhibitors, Renal Agents,	Yes	No
Verapamil	2.35e-13	682	Anti-Arrhythmia Agents, Calcium Channel Blockers, Cardiovascular Agents, Membrane Transport Modulators, Vasodilator Agents,	Yes	No
Chloramphenicol	2.37e-13	1549	Anti-Bacterial Agents, Anti-Infective Agents, Enzyme Inhibitors, Protein Synthesis Inhibitors,	Yes	No
Tazobactam	2.91e-13	27	Enzyme Inhibitors,	No	No
Interferons	3.28e-13	839	Anti-Infective Agents, Antineoplastic Agents, Antiviral Agents,	Yes	No
Telmisartan	3.59e-13	17	Angiotensin II Type 1 Receptor Blockers, Angiotensin-Converting Enzyme Inhibitors, Enzyme Inhibitors, Protease Inhibitors,	No	No
Acetazolamide	4.01e-13	209	Anticonvulsants, Carbonic Anhydrase Inhibitors, Central Nervous System Agents, Diuretics, Enzyme Inhibitors, Natriuretic Agents,	Yes	No
Interleukin 1 Receptor Antagonist Protein	4.09e-13	96	Antirheumatic Agents,	Yes	No
Chlordiazepoxide	4.11e-13	20	Adjuvants, Anesthesia, Anti-Anxiety Agents, Central Nervous System Agents, Central Nervous System Depressants, GABA Agents, GABA Modulators, Hypnotics and Sedatives, Neurotransmitter Agents, Tranquilizing Agents, Psychotropic Drugs,	No	No
Betaxolol	4.12e-13	18	Adrenergic Agents, Adrenergic Antagonists, Adrenergic beta-Antagonists, Antihypertensive Agents, Autonomic Agents, Cardiovascular Agents, Peripheral Nervous System Agents, Neurotransmitter Agents, Sympatholytics,	No	No
Clofibrate	4.17e-13	87	Anticholesteremic Agents, Antilipemic Agents, Antimetabolites,	Yes	No
Fluoxetine	4.48e-13	141	Antidepressive Agents, Antidepressive Agents, Second-Generation, Central Nervous System Agents, Neurotransmitter Agents, Neurotransmitter Uptake Inhibitors, Serotonin Agents, Serotonin Uptake Inhibitors, Psychotropic Drugs,	Yes	No
Butylated Hydroxyanisole	5.06e-13	88	Antioxidants, Carcinogens, Noxae, Protective Agents,	No	No
Immunoglobulin G	5.08e-13	2769	Immunologic Factors,	Yes	No
Bupropion	5.13e-13	14	Antidepressive Agents, Antidepressive Agents, Second-Generation, Central Nervous System Agents, Dopamine Agents, Dopamine Uptake Inhibitors, Neurotransmitter Agents, Neurotransmitter Uptake Inhibitors, Psychotropic Drugs,	No	No
Gatifloxacin	6.1e-13	88	Anti-Infective Agents,	No	No
Itraconazole	7.2e-13	47	Anti-Infective Agents, Antifungal Agents, Antiparasitic Agents, Antiprotozoal Agents,	No	No
Methadone	7.55e-13	62	Analgesics, Analgesics, Opioid, Antitussive Agents, Central Nervous System Agents, Central Nervous System Depressants, Narcotics, Peripheral Nervous System Agents, Respiratory System Agents, Sensory System Agents,	Yes	No
Bupivacaine	8.12e-13	64	Anesthetics, Anesthetics, Local, Central Nervous System Agents, Central Nervous System Depressants, Peripheral Nervous System Agents, Sensory System Agents,	Yes	No
Dinoprost	8.44e-13	324	Abortifacient Agents, Abortifacient Agents, Nonsteroidal, Oxytocics, Reproductive Control Agents,	Yes	No
Aspirin	9.22e-13	799	Analgesics, Analgesics, Non-Narcotic, Anti-Inflammatory Agents, Anti-Inflammatory Agents, Non-Steroidal, Antirheumatic Agents, Cardiovascular Agents, Enzyme Inhibitors, Cyclooxygenase Inhibitors, Fibrinolytic Agents, Fibrin Modulating Agents, Peripheral Nervous System Agents, Hematologic Agents, Platelet Aggregation Inhibitors, Sensory System Agents,	Yes	No
Nevirapine	9.92e-13	34	Anti-Infective Agents, Anti-HIV Agents, Anti-Retroviral Agents, Antiviral Agents, Enzyme Inhibitors, Nucleic Acid Synthesis Inhibitors, Reverse Transcriptase Inhibitors,	No	No
Piperazine	9.92e-13	153	Anthelmintics, Anti-Infective Agents, Antinematodal Agents, Antiparasitic Agents,	No	No
Fludarabine	1.04e-12	221	Antineoplastic Agents,	No	No
Formaldehyde	1.08e-12	467	Anti-Infective Agents, Disinfectants, Fixatives,	Yes	No
Chlortetracycline	1.36e-12	19	Anti-Bacterial Agents, Anti-Infective Agents, Antiparasitic Agents, Antiprotozoal Agents, Enzyme Inhibitors, Protein Synthesis Inhibitors,	No	No
Dinoprostone	1.51e-12	1067	Oxytocics, Reproductive Control Agents,	Yes	No
Carvedilol	1.51e-12	39	Adrenergic alpha-Antagonists, Adrenergic Agents, Adrenergic Antagonists, Adrenergic beta-Antagonists, Antihypertensive Agents, Cardiovascular Agents, Neurotransmitter Agents, Vasodilator Agents,	No	No
Suramin	1.64e-12	80	Anthelmintics, Anti-Infective Agents, Antinematodal Agents, Antiparasitic Agents, Antineoplastic Agents, Antiprotozoal Agents, Trypanocidal Agents,	Yes	No
Paroxetine	1.76e-12	44	Antidepressive Agents, Antidepressive Agents, Second-Generation, Central Nervous System Agents, Neurotransmitter Agents, Neurotransmitter Uptake Inhibitors, Serotonin Agents, Serotonin Uptake Inhibitors, Psychotropic Drugs,	Yes	No
Succinylcholine	1.78e-12	45	Neuromuscular Agents, Neuromuscular Blocking Agents, Neuromuscular Depolarizing Agents, Peripheral Nervous System Agents,	No	No
Hydrogen Peroxide	1.99e-12	3435	Anti-Infective Agents, Anti-Infective Agents, Local, Noxae, Oxidants,	Yes	No
Chlorzoxazone	2.05e-12	15	Central Nervous System Agents, Muscle Relaxants, Central, Neuromuscular Agents, Peripheral Nervous System Agents,	No	No
Fluorometholone	2.12e-12	37	Adrenal Cortex Hormones, Anti-Allergic Agents, Anti-Inflammatory Agents, Hormones, Hormones, Hormone Substitutes, and Hormone Antagonists, Glucocorticoids,	Yes	No
Cefixime	2.22e-12	63	Anti-Bacterial Agents, Anti-Infective Agents,	No	No
Clopidogrel	2.28e-12	29	Hematologic Agents, Platelet Aggregation Inhibitors,	No	No
Duloxetine	2.39e-12	26	Adrenergic Agents, Adrenergic Uptake Inhibitors, Antidepressive Agents, Central Nervous System Agents, Dopamine Agents, Dopamine Uptake Inhibitors, Neurotransmitter Agents, Neurotransmitter Uptake Inhibitors, Serotonin Agents, Serotonin Uptake Inhibitors, Psychotropic Drugs,	No	No
Ethylmaleimide	2.52e-12	129	Enzyme Inhibitors, Indicators and Reagents, Sulfhydryl Reagents,	Yes	No
Etodolac	2.89e-12	33	Analgesics, Analgesics, Non-Narcotic, Anti-Inflammatory Agents, Anti-Inflammatory Agents, Non-Steroidal, Antirheumatic Agents, Cyclooxygenase Inhibitors, Enzyme Inhibitors, Peripheral Nervous System Agents, Sensory System Agents,	No	No
Chloroquine	2.93e-12	280	Amebicides, Anti-Infective Agents, Antimalarials, Antiparasitic Agents, Antiprotozoal Agents, Antirheumatic Agents,	Yes	No
Leuprolide	2.93e-12	37	Antineoplastic Agents, Hormonal, Antineoplastic Agents, Fertility Agents, Fertility Agents, Female, Reproductive Control Agents,	Yes	No
Mecamylamine	3.6e-12	60	Antihypertensive Agents, Autonomic Agents, Cardiovascular Agents, Cholinergic Agents, Cholinergic Antagonists, Ganglionic Blockers, Peripheral Nervous System Agents, Neurotransmitter Agents, Nicotinic Antagonists,	No	No
Lithium Chloride	3.7e-12	91	Adjuvants, Immunologic, Antimanic Agents, Central Nervous System Agents, Central Nervous System Depressants, Immunologic Factors, Tranquilizing Agents, Psychotropic Drugs,	Yes	No
Tachykinins	3.7e-12	27	Neurotransmitter Agents,	Yes	No
Antimicrobial Cationic Peptides	5.14e-12	77	Anti-Infective Agents,	No	No
Oxidopamine	6.05e-12	111	Adrenergic Agents, Autonomic Agents, Peripheral Nervous System Agents, Neurotransmitter Agents, Sympatholytics,	No	No
Calcitonin Gene-Related Peptide	6.13e-12	162	Cardiovascular Agents, Vasodilator Agents,	Yes	No
Vincristine	7.18e-12	1122	Antimitotic Agents, Antineoplastic Agents, Antineoplastic Agents, Phytogenic, Mitosis Modulators, Tubulin Modulators,	Yes	No
Bicalutamide	7.45e-12	122	Androgen Antagonists, Antineoplastic Agents, Hormone Antagonists, Hormones, Hormone Substitutes, and Hormone Antagonists,	No	No
Disopyramide	9.09e-12	17	Anti-Arrhythmia Agents, Cardiovascular Agents,	No	No
Ketotifen	1.03e-11	18	Anti-Allergic Agents, Antipruritics, Dermatologic Agents, Histamine Agents, Histamine Antagonists, Histamine H1 Antagonists, Neurotransmitter Agents,	No	No
Docetaxel	1.09e-11	280	Antineoplastic Agents,	Yes	Yes
Chlorhexidine	1.11e-11	60	Anti-Infective Agents, Anti-Infective Agents, Local, Cosmetics, Disinfectants, Mouthwashes,	Yes	No
Buthionine Sulfoximine	1.23e-11	55	Antimetabolites, Antimetabolites, Antineoplastic, Antineoplastic Agents, Enzyme Inhibitors, Noxae, Protective Agents, Radiation-Protective Agents, Radiation-Sensitizing Agents,	Yes	No
Buspirone	1.46e-11	85	Anti-Anxiety Agents, Central Nervous System Agents, Central Nervous System Depressants, Neurotransmitter Agents, Serotonin Agonists, Serotonin Agents, Tranquilizing Agents, Psychotropic Drugs,	No	No
Nickel	1.5e-11	234	Micronutrients, Growth Substances, Trace Elements,	Yes	No
Dantrolene	1.52e-11	70	Central Nervous System Agents, Muscle Relaxants, Central, Neuromuscular Agents, Peripheral Nervous System Agents,	No	No
Titanium Dioxide	1.58e-11	33	Biocompatible Materials, Cosmetics, Coloring Agents, Dermatologic Agents, Protective Agents, Photosensitizing Agents, Sunscreening Agents, Radiation-Protective Agents, Radiation-Sensitizing Agents,	No	No
Pergolide	1.67e-11	21	Dopamine Agents, Dopamine Agonists, Neurotransmitter Agents,	No	No
Nordihydroguaiaretic Acid	1.86e-11	39	Analgesics, Analgesics, Non-Narcotic, Anti-Inflammatory Agents, Non-Steroidal, Anti-Inflammatory Agents, Antioxidants, Cyclooxygenase Inhibitors, Enzyme Inhibitors, Protective Agents, Peripheral Nervous System Agents, Lipoxygenase Inhibitors, Sensory System Agents,	Yes	No
Cantharidin	1.99e-11	45	Enzyme Inhibitors, Noxae, Irritants, Riot Control Agents, Chemical,	No	No
Nitroglycerin	2.01e-11	134	Cardiovascular Agents, Explosive Agents, Vasodilator Agents,	Yes	No
Rasagiline	2.11e-11	11	Central Nervous System Agents, Enzyme Inhibitors, Monoamine Oxidase Inhibitors, Protective Agents, Neuroprotective Agents,	No	No
Angiotensinogen	2.26e-11	28	Enzyme Inhibitors, Protease Inhibitors, Serine Proteinase Inhibitors,	No	No
Sodium Thiosulfate	2.34e-11	16	Anti-Bacterial Agents, Anti-Infective Agents, Antidotes, Antioxidants, Antitubercular Agents, Chelating Agents, Protective Agents,	No	No
Menthol	2.75e-11	25	Antipruritics, Dermatologic Agents,	No	No
Thalidomide	3.29e-11	147	Angiogenesis Inhibitors, Angiogenesis Modulating Agents, Anti-Bacterial Agents, Anti-Infective Agents, Antineoplastic Agents, Noxae, Growth Substances, Immunologic Factors, Immunosuppressive Agents, Leprostatic Agents, Teratogens, Growth Inhibitors,	Yes	No
Muramidase	3.33e-11	157	Anti-Infective Agents,	Yes	No
Phenylephrine	3.89e-11	751	Adrenergic Agents, Adrenergic Agonists, Adrenergic alpha-Agonists, Autonomic Agents, Cardiotonic Agents, Cardiovascular Agents, Protective Agents, Mydriatics, Nasal Decongestants, Peripheral Nervous System Agents, Neurotransmitter Agents, Sympathomimetics, Vasoconstrictor Agents, Respiratory System Agents,	No	No
Erythromycin	4.05e-11	292	Anti-Bacterial Agents, Anti-Infective Agents, Enzyme Inhibitors, Gastrointestinal Agents, Protein Synthesis Inhibitors,	Yes	No
Tranylcypromine	4.86e-11	22	Anti-Anxiety Agents, Antidepressive Agents, Central Nervous System Depressants, Central Nervous System Agents, Enzyme Inhibitors, Monoamine Oxidase Inhibitors, Tranquilizing Agents, Psychotropic Drugs,	No	No
Butylated Hydroxytoluene	5.24e-11	64	Antioxidants, Protective Agents,	No	No
Disulfiram	5.39e-11	39	Alcohol Deterrents, Central Nervous System Agents, Enzyme Inhibitors,	Yes	No
Cysteamine	5.71e-11	57	Protective Agents, Radiation-Protective Agents,	No	No
Praziquantel	5.71e-11	28	Anthelmintics, Anti-Infective Agents, Antiparasitic Agents,	No	No
Venlafaxine	6.31e-11	19	Antidepressive Agents, Antidepressive Agents, Second-Generation, Central Nervous System Agents, Neurotransmitter Agents, Neurotransmitter Uptake Inhibitors, Serotonin Agents, Serotonin Uptake Inhibitors, Psychotropic Drugs,	No	No
Gemifloxacin	6.59e-11	61	Anti-Bacterial Agents, Anti-Infective Agents,	No	No
Voriconazole	6.86e-11	13	Anti-Infective Agents, Antifungal Agents,	No	No
Phenelzine	8.55e-11	15	Antidepressive Agents, Central Nervous System Agents, Enzyme Inhibitors, Monoamine Oxidase Inhibitors, Psychotropic Drugs,	No	No
Bromocriptine	8.99e-11	194	Anti-Dyskinesia Agents, Antiparkinson Agents, Central Nervous System Agents, Dopamine Agents, Dopamine Agonists, Neurotransmitter Agents, Hormone Antagonists, Hormones, Hormone Substitutes, and Hormone Antagonists,	Yes	No
Ionomycin	9.03e-11	435	Membrane Transport Modulators, Ionophores,	Yes	No
Cetirizine	1.02e-10	19	Anti-Allergic Agents, Neurotransmitter Agents, Histamine Agents, Histamine Antagonists, Histamine H1 Antagonists, Histamine H1 Antagonists, Non-Sedating,	No	No
Entacapone	1.16e-10	9	Anti-Dyskinesia Agents, Antiparkinson Agents, Central Nervous System Agents, Enzyme Inhibitors,	No	No
Cyclophosphamide	1.17e-10	1570	Alkylating Agents, Antineoplastic Agents, Antineoplastic Agents, Alkylating, Antirheumatic Agents, Noxae, Immunologic Factors, Mutagens, Myeloablative Agonists, Immunosuppressive Agents,	Yes	No
Desflurane	1.22e-10	28	Anesthetics, Anesthetics, General, Anesthetics, Inhalation, Central Nervous System Agents, Central Nervous System Depressants,	No	No
Oxaliplatin	1.25e-10	161	Antineoplastic Agents,	No	No
Amino Acid Chloromethyl Ketones	1.31e-10	801	Alkylating Agents, Enzyme Inhibitors, Noxae, Protein Synthesis Inhibitors, Protease Inhibitors, Serine Proteinase Inhibitors,	Yes	No
Interleukin-12	1.33e-10	1306	Adjuvants, Immunologic, Angiogenesis Inhibitors, Angiogenesis Modulating Agents, Antineoplastic Agents, Immunologic Factors, Growth Substances, Growth Inhibitors,	Yes	No
Iohexol	1.37e-10	34	Contrast Media,	Yes	No
Benzoates	1.37e-10	32	Anti-Infective Agents, Antifungal Agents,	Yes	No
Pantoprazole	1.81e-10	23	Anti-Ulcer Agents, Gastrointestinal Agents,	No	No
Nandrolone	1.82e-10	41	Anabolic Agents, Androgens, Hormones, Hormone Substitutes, and Hormone Antagonists, Hormones,	Yes	No
Exenatide	1.83e-10	18	Hypoglycemic Agents,	No	No
Estramustine	1.84e-10	42	Alkylating Agents, Antineoplastic Agents, Antineoplastic Agents, Alkylating, Antineoplastic Agents, Hormonal, Noxae,	Yes	No
Pentobarbital	1.88e-10	348	Adjuvants, Anesthesia, Central Nervous System Depressants, Central Nervous System Agents, GABA Agents, GABA Modulators, Hypnotics and Sedatives, Neurotransmitter Agents,	No	No
Heroin	2e-10	74	Analgesics, Analgesics, Opioid, Central Nervous System Agents, Central Nervous System Depressants, Narcotics, Peripheral Nervous System Agents, Sensory System Agents,	Yes	No
1-Methyl-4-Phenylpyridinium	2.11e-10	27	Herbicides, Pesticides,	No	No
Danazol	2.24e-10	26	Estrogen Receptor Modulators, Estrogen Antagonists, Hormone Antagonists, Hormones, Hormone Substitutes, and Hormone Antagonists,	Yes	No
Sertraline	2.25e-10	19	Antidepressive Agents, Central Nervous System Agents, Neurotransmitter Agents, Neurotransmitter Uptake Inhibitors, Serotonin Agents, Serotonin Uptake Inhibitors, Psychotropic Drugs,	Yes	No
Capecitabine	2.59e-10	50	Antimetabolites, Antimetabolites, Antineoplastic, Antineoplastic Agents, Noxae,	Yes	Yes
Amlodipine	2.77e-10	60	Antihypertensive Agents, Cardiovascular Agents, Calcium Channel Blockers, Membrane Transport Modulators, Vasodilator Agents,	No	No
Norethindrone	2.91e-10	24	Contraceptive Agents, Contraceptive Agents, Female, Contraceptives, Oral, Contraceptives, Oral, Synthetic, Reproductive Control Agents,	Yes	No
Quetiapine	2.93e-10	26	Antipsychotic Agents, Central Nervous System Depressants, Central Nervous System Agents, Tranquilizing Agents, Psychotropic Drugs,	No	No
Methoxsalen	2.98e-10	36	Dermatologic Agents, Cross-Linking Reagents, Indicators and Reagents, Photosensitizing Agents, Radiation-Sensitizing Agents,	Yes	No
Midazolam	3.17e-10	151	Adjuvants, Anesthesia, Anesthetics, Anesthetics, General, Anesthetics, Intravenous, Anti-Anxiety Agents, Central Nervous System Agents, Central Nervous System Depressants, GABA Agents, GABA Modulators, Hypnotics and Sedatives, Neurotransmitter Agents, Tranquilizing Agents, Psychotropic Drugs,	Yes	No
Immunoglobulin Heavy Chains	3.61e-10	566	Immunologic Factors,	Yes	No
Lorazepam	3.75e-10	47	Anti-Anxiety Agents, Anticonvulsants, Antiemetics, Autonomic Agents, Central Nervous System Agents, Central Nervous System Depressants, GABA Agents, GABA Modulators, Gastrointestinal Agents, Hypnotics and Sedatives, Peripheral Nervous System Agents, Neurotransmitter Agents, Tranquilizing Agents, Psychotropic Drugs,	Yes	No
Carbachol	3.99e-10	1082	Analgesics, Analgesics, Non-Narcotic, Autonomic Agents, Cardiotonic Agents, Cardiovascular Agents, Central Nervous System Agents, Cholinergic Agents, Cholinergic Agonists, Miotics, Protective Agents, Peripheral Nervous System Agents, Neurotransmitter Agents, Sensory System Agents,	No	No
Domperidone	4.38e-10	19	Antiemetics, Autonomic Agents, Central Nervous System Agents, Dopamine Agents, Dopamine Antagonists, Gastrointestinal Agents, Peripheral Nervous System Agents, Neurotransmitter Agents,	Yes	No
Tenofovir Disoproxil	4.62e-10	46	Anti-HIV Agents, Anti-Infective Agents, Anti-Retroviral Agents, Antiviral Agents, Enzyme Inhibitors, Nucleic Acid Synthesis Inhibitors, Reverse Transcriptase Inhibitors,	No	No
Quinine	4.64e-10	113	Analgesics, Analgesics, Non-Narcotic, Anti-Infective Agents, Antimalarials, Antiparasitic Agents, Antiprotozoal Agents, Central Nervous System Agents, Muscle Relaxants, Central, Neuromuscular Agents, Peripheral Nervous System Agents, Sensory System Agents,	Yes	No
Indinavir	4.79e-10	94	Anti-Infective Agents, Anti-HIV Agents, Anti-Retroviral Agents, Antiviral Agents, Enzyme Inhibitors, Protease Inhibitors, HIV Protease Inhibitors,	No	No
Mineral Oil	4.86e-10	38	Dermatologic Agents, Emollients,	No	No
Tamsulosin	5.31e-10	17	Adrenergic Agents, Adrenergic alpha-Antagonists, Adrenergic Antagonists, Antineoplastic Agents, Neurotransmitter Agents,	No	No
Sucralfate	5.46e-10	23	Anti-Ulcer Agents, Gastrointestinal Agents,	No	No
Buprenorphine	6.68e-10	33	Analgesics, Analgesics, Opioid, Central Nervous System Agents, Central Nervous System Depressants, Narcotic Antagonists, Narcotics, Peripheral Nervous System Agents, Sensory System Agents,	Yes	No
Melatonin	6.76e-10	216	Antioxidants, Central Nervous System Agents, Central Nervous System Depressants, Protective Agents,	Yes	No
Triazolam	7.39e-10	15	Adjuvants, Anesthesia, Anti-Anxiety Agents, Central Nervous System Depressants, Central Nervous System Agents, GABA Agents, GABA Modulators, Neurotransmitter Agents, Tranquilizing Agents, Psychotropic Drugs,	No	No
Sulfamethazine	7.4e-10	10	Anti-Infective Agents,	Yes	No
Vinorelbine	8.17e-10	102	Antineoplastic Agents, Antineoplastic Agents, Phytogenic,	No	No
Asparaginase	9.23e-10	75	Antineoplastic Agents,	Yes	No
Rosuvastatin	1.07e-09	30	Anticholesteremic Agents, Antilipemic Agents, Antimetabolites, Enzyme Inhibitors, Hydroxymethylglutaryl-CoA Reductase Inhibitors,	No	No
Interferon Type I	1.19e-09	385	Anti-Infective Agents, Antineoplastic Agents, Antiviral Agents,	Yes	No
Methyldopa	1.2e-09	15	Adrenergic Agonists, Adrenergic alpha-Agonists, Adrenergic Agents, Antihypertensive Agents, Autonomic Agents, Cardiovascular Agents, Peripheral Nervous System Agents, Neurotransmitter Agents, Sympatholytics,	Yes	No
Dynorphins	1.2e-09	72	Neurotransmitter Agents,	No	No
Dihydrouracil Dehydrogenase (Nadp)	1.23e-09	25	Antineoplastic Agents,	Yes	No
Meloxicam	1.24e-09	65	Analgesics, Analgesics, Non-Narcotic, Anti-Inflammatory Agents, Non-Steroidal, Anti-Inflammatory Agents, Antirheumatic Agents, Cyclooxygenase Inhibitors, Enzyme Inhibitors, Peripheral Nervous System Agents, Sensory System Agents,	No	No
Immunoglobulin E	1.27e-09	741	Immunologic Factors,	Yes	No
Valdecoxib	1.43e-09	40	Analgesics, Analgesics, Non-Narcotic, Anti-Inflammatory Agents, Anti-Inflammatory Agents, Non-Steroidal, Antirheumatic Agents, Cyclooxygenase Inhibitors, Enzyme Inhibitors, Peripheral Nervous System Agents, Sensory System Agents,	No	No
Quinapril	1.44e-09	13	Angiotensin-Converting Enzyme Inhibitors, Antihypertensive Agents, Cardiovascular Agents, Enzyme Inhibitors, Protease Inhibitors,	No	No
Lamivudine	1.49e-09	111	Anti-Infective Agents, Anti-HIV Agents, Anti-Retroviral Agents, Antiviral Agents, Enzyme Inhibitors, Nucleic Acid Synthesis Inhibitors, Reverse Transcriptase Inhibitors,	Yes	No
Caspofungin	1.58e-09	16	Anti-Infective Agents, Antifungal Agents,	No	No
Isoflurane	1.7e-09	267	Anesthetics, Anesthetics, General, Anesthetics, Inhalation, Central Nervous System Agents, Central Nervous System Depressants,	Yes	No
Metyrapone	1.77e-09	65	Antimetabolites, Enzyme Inhibitors, Noxae,	Yes	No
Vidarabine	1.77e-09	70	Anti-Infective Agents, Antimetabolites, Antiviral Agents, Noxae,	Yes	No
Alprazolam	1.89e-09	34	Anti-Anxiety Agents, Central Nervous System Agents, Central Nervous System Depressants, GABA Agents, GABA Modulators, Hypnotics and Sedatives, Neurotransmitter Agents, Tranquilizing Agents, Psychotropic Drugs,	Yes	No
Ethiodized Oil	1.89e-09	9	Antineoplastic Agents, Contrast Media,	No	No
Amobarbital	2.02e-09	13	Central Nervous System Agents, Central Nervous System Depressants, GABA Agents, GABA Modulators, Hypnotics and Sedatives, Neurotransmitter Agents,	No	No
Gemtuzumab	2.27e-09	11	Antineoplastic Agents,	No	No
Mephenytoin	2.48e-09	11	Anticonvulsants, Central Nervous System Agents,	No	No
Aripiprazole	2.51e-09	13	Antipsychotic Agents, Central Nervous System Agents, Central Nervous System Depressants, Tranquilizing Agents, Psychotropic Drugs,	No	No
Lansoprazole	2.67e-09	43	Anti-Infective Agents, Anti-Ulcer Agents, Enzyme Inhibitors, Gastrointestinal Agents,	No	No
Arsenicals	2.71e-09	245	Indicators and Reagents, Sulfhydryl Reagents,	Yes	No
Turpentine	2.73e-09	45	Noxae, Irritants, Solvents, Riot Control Agents, Chemical,	No	No
Cidofovir	2.79e-09	49	Anti-Infective Agents, Anti-HIV Agents, Anti-Retroviral Agents, Antineoplastic Agents, Antiviral Agents, Radiation-Sensitizing Agents,	No	No
Cefoperazone	2.99e-09	24	Anti-Bacterial Agents, Anti-Infective Agents,	Yes	No
Cystatins	2.99e-09	24	Cysteine Proteinase Inhibitors, Enzyme Inhibitors, Protease Inhibitors,	Yes	No
Tunicamycin	3.19e-09	110	Anti-Bacterial Agents, Anti-Infective Agents, Antiviral Agents,	Yes	No
Magnesium Sulfate	3.36e-09	29	Analgesics, Anesthetics, Anti-Arrhythmia Agents, Anticonvulsants, Cardiovascular Agents, Calcium Channel Blockers, Central Nervous System Agents, Central Nervous System Depressants, Membrane Transport Modulators, Peripheral Nervous System Agents, Tocolytic Agents, Reproductive Control Agents, Sensory System Agents,	No	No
Alendronate	3.86e-09	55	Bone Density Conservation Agents,	Yes	No
Clindamycin	4.11e-09	90	Anti-Bacterial Agents, Anti-Infective Agents, Enzyme Inhibitors, Protein Synthesis Inhibitors,	Yes	No
Lapatinib	4.39e-09	23	Antineoplastic Agents, Enzyme Inhibitors, Protein Kinase Inhibitors,	Yes	Yes
Cholestyramine	4.4e-09	23	Anion Exchange Resins, Anticholesteremic Agents, Antilipemic Agents, Antimetabolites, Ion Exchange Resins,	No	No
Efavirenz	4.48e-09	43	Anti-Infective Agents, Anti-HIV Agents, Anti-Retroviral Agents, Antiviral Agents, Enzyme Inhibitors, Nucleic Acid Synthesis Inhibitors, Reverse Transcriptase Inhibitors,	No	No
Darbepoetin Alfa	4.54e-09	12	Hematinics, Hematologic Agents,	No	No
Zinc Sulfate	4.86e-09	29	Astringents, Dermatologic Agents,	Yes	No
Remifentanil	5.11e-09	16	Analgesics, Analgesics, Opioid, Anesthetics, Anesthetics, General, Anesthetics, Intravenous, Central Nervous System Depressants, Central Nervous System Agents, Hypnotics and Sedatives, Peripheral Nervous System Agents, Sensory System Agents,	No	No
Rotenone	5.25e-09	87	Enzyme Inhibitors, Pesticides, Insecticides, Uncoupling Agents,	Yes	No
Prazosin	5.44e-09	370	Adrenergic Agents, Adrenergic alpha-Antagonists, Adrenergic Antagonists, Antihypertensive Agents, Cardiovascular Agents, Neurotransmitter Agents,	No	No
Abciximab	5.58e-09	22	Anticoagulants, Hematologic Agents, Platelet Aggregation Inhibitors,	No	No
Hiv Antibodies	6.11e-09	188	Immunologic Factors,	No	No
Nitrofurantoin	6.57e-09	26	Anti-Infective Agents, Anti-Infective Agents, Urinary, Renal Agents,	No	No
Teriparatide	6.84e-09	13	Bone Density Conservation Agents,	No	No
Bilirubin	7.1e-09	59	Antioxidants, Protective Agents,	Yes	No
Hydralazine	7.51e-09	83	Antihypertensive Agents, Cardiovascular Agents, Vasodilator Agents,	Yes	No
Castor Oil	7.63e-09	20	Cathartics, Gastrointestinal Agents,	Yes	No
Daclizumab	8.17e-09	17	Immunologic Factors, Immunosuppressive Agents,	No	No
Ticlopidine	8.63e-09	35	Cardiovascular Agents, Fibrinolytic Agents, Fibrin Modulating Agents, Hematologic Agents, Platelet Aggregation Inhibitors,	No	No
Cycloheximide	1.05e-08	2016	Anti-Infective Agents, Antifungal Agents, Antibiotics, Antifungal, Enzyme Inhibitors, Protein Synthesis Inhibitors,	Yes	No
Complement System Proteins	1.11e-08	280	Immunologic Factors,	Yes	No
Hemolysin Proteins	1.16e-08	64	Cytotoxins, Noxae, Hemolytic Agents,	Yes	No
Clotrimazole	1.25e-08	63	Anti-Infective Agents, Anti-Infective Agents, Local, Antifungal Agents,	No	No
Cyclin-Dependent Kinase Inhibitor P57	1.34e-08	166	Enzyme Inhibitors, Protein Kinase Inhibitors,	Yes	No
Serpins	1.37e-08	392	Enzyme Inhibitors, Protease Inhibitors, Serine Proteinase Inhibitors,	Yes	No
Lactulose	1.49e-08	43	Gastrointestinal Agents,	No	No
Pyrazinamide	1.58e-08	9	Anti-Bacterial Agents, Anti-Infective Agents, Antitubercular Agents,	No	No
Isradipine	1.61e-08	25	Antihypertensive Agents, Cardiovascular Agents, Calcium Channel Blockers, Membrane Transport Modulators, Vasodilator Agents,	No	No
Endorphins	1.65e-08	84	Neurotransmitter Agents,	Yes	No
Acetylmuramyl-Alanyl-Isoglutamine	1.93e-08	43	Adjuvants, Immunologic, Immunologic Factors,	Yes	No
Albuterol	1.99e-08	109	Adrenergic Agonists, Adrenergic Agents, Adrenergic beta-Agonists, Anti-Asthmatic Agents, Autonomic Agents, Bronchodilator Agents, Peripheral Nervous System Agents, Neurotransmitter Agents, Tocolytic Agents, Reproductive Control Agents, Respiratory System Agents,	No	No
Opsonin Proteins	2.12e-08	59	Immunologic Factors,	Yes	No
Beta 2-Glycoprotein I	2.22e-08	88	Anticoagulants, Hematologic Agents,	No	No
Zolmitriptan	2.3e-08	10	Neurotransmitter Agents, Serotonin Agents, Serotonin Agonists,	No	No
Gramicidin	2.32e-08	86	Anti-Bacterial Agents, Anti-Infective Agents, Anti-Infective Agents, Local,	No	No
Immunoglobulin Fragments	2.34e-08	89	Immunologic Factors,	Yes	No
Benserazide	2.34e-08	15	Anti-Dyskinesia Agents, Antiparkinson Agents, Central Nervous System Agents, Dopamine Agents, Enzyme Inhibitors, Neurotransmitter Agents,	No	No
Tiagabine	2.54e-08	38	Anticonvulsants, Central Nervous System Agents, GABA Agents, GABA Agonists, Neurotransmitter Agents, Neurotransmitter Uptake Inhibitors,	No	No
Lincomycin	2.64e-08	26	Anti-Infective Agents, Anti-Bacterial Agents, Enzyme Inhibitors, Protein Synthesis Inhibitors,	No	No
Etoposide	2.74e-08	2609	Antineoplastic Agents, Antineoplastic Agents, Phytogenic,	Yes	No
Azacitidine	2.76e-08	316	Antimetabolites, Antimetabolites, Antineoplastic, Antineoplastic Agents, Enzyme Inhibitors, Noxae,	Yes	No
Trypan Blue	3.13e-08	463	Coloring Agents,	Yes	No
Terodiline	4.36e-08	6	Autonomic Agents, Calcium Channel Blockers, Cardiovascular Agents, Membrane Transport Modulators, Parasympatholytics, Peripheral Nervous System Agents,	No	No
Testolactone	4.47e-08	21	Antineoplastic Agents, Hormonal, Antineoplastic Agents,	Yes	Yes
Dihydrotestosterone	6.06e-08	388	Androgens, Hormones, Hormones, Hormone Substitutes, and Hormone Antagonists,	Yes	No
Phentolamine	6.17e-08	177	Adrenergic Agents, Adrenergic alpha-Antagonists, Adrenergic Antagonists, Antihypertensive Agents, Cardiovascular Agents, Neurotransmitter Agents,	No	No
Bisoprolol	6.4e-08	8	Adrenergic Agents, Adrenergic Antagonists, Adrenergic beta-Antagonists, Antihypertensive Agents, Autonomic Agents, Cardiovascular Agents, Peripheral Nervous System Agents, Neurotransmitter Agents, Sympatholytics,	No	No
Pectin	7.01e-08	80	Antidiarrheals, Gastrointestinal Agents,	No	No
4-Butyrolactone	7.04e-08	69	Solvents,	Yes	No
Fumonisins	7.42e-08	27	Noxae, Poisons,	No	No
Doxazosin	8.16e-08	38	Adrenergic alpha-Antagonists, Adrenergic Agents, Adrenergic Antagonists, Antihypertensive Agents, Cardiovascular Agents, Neurotransmitter Agents,	No	No
Interferon Alfa-2A	8.91e-08	35	Angiogenesis Inhibitors, Angiogenesis Modulating Agents, Anti-Infective Agents, Antineoplastic Agents, Antiviral Agents, Growth Substances, Growth Inhibitors,	Yes	No
Thioridazine	1.01e-07	17	Antipsychotic Agents, Central Nervous System Depressants, Central Nervous System Agents, Dopamine Agents, Dopamine Antagonists, Neurotransmitter Agents, Tranquilizing Agents, Psychotropic Drugs,	Yes	No
Tetracycline	1.06e-07	1204	Anti-Bacterial Agents, Anti-Infective Agents, Enzyme Inhibitors, Protein Synthesis Inhibitors,	Yes	No
Mefloquine	1.2e-07	20	Anti-Infective Agents, Antimalarials, Antiparasitic Agents, Antiprotozoal Agents,	No	No
Rheumatoid Factor	1.23e-07	192	Immunologic Factors,	Yes	No
Saquinavir	1.24e-07	58	Anti-HIV Agents, Anti-Infective Agents, Anti-Retroviral Agents, Antiviral Agents, Enzyme Inhibitors, Protease Inhibitors, HIV Protease Inhibitors,	No	No
Triamcinolone Acetonide	1.25e-07	57	Adrenal Cortex Hormones, Anti-Inflammatory Agents, Hormones, Hormone Substitutes, and Hormone Antagonists, Immunologic Factors, Immunosuppressive Agents, Hormones, Glucocorticoids,	Yes	No
Raltitrexed	1.25e-07	10	Antimetabolites, Antimetabolites, Antineoplastic, Antineoplastic Agents, Enzyme Inhibitors, Folic Acid Antagonists, Noxae,	No	No
Floxuridine	1.32e-07	27	Antineoplastic Agents, Antimetabolites, Antimetabolites, Antineoplastic, Noxae,	Yes	No
Sodium Dodecyl Sulfate	1.41e-07	132	Surface-Active Agents,	Yes	No
Plasmin	1.42e-07	482	Cardiovascular Agents, Fibrinolytic Agents, Fibrin Modulating Agents, Hematologic Agents,	Yes	No
Cabergoline	1.47e-07	18	Anti-Dyskinesia Agents, Antineoplastic Agents, Antiparkinson Agents, Central Nervous System Agents, Dopamine Agents, Dopamine Agonists, Neurotransmitter Agents,	No	No
Chlorambucil	1.54e-07	132	Alkylating Agents, Antineoplastic Agents, Antineoplastic Agents, Alkylating, Noxae,	Yes	No
Coal Tar	1.57e-07	39	Dermatologic Agents, Keratolytic Agents,	No	No
Hydroxyl Radical	1.62e-07	83	Noxae, Oxidants,	Yes	No
Platelet Factor 4	1.83e-07	26	Coagulants, Hematologic Agents,	Yes	No
Podophyllotoxin	1.84e-07	57	Antimitotic Agents, Antineoplastic Agents, Phytogenic, Antineoplastic Agents, Dermatologic Agents, Mitosis Modulators, Keratolytic Agents, Tubulin Modulators,	Yes	No
Nimodipine	1.87e-07	105	Antihypertensive Agents, Cardiovascular Agents, Calcium Channel Blockers, Membrane Transport Modulators, Vasodilator Agents,	No	No
Doxycycline	2.14e-07	442	Anti-Bacterial Agents, Anti-Infective Agents, Antimalarials, Antiparasitic Agents, Antiprotozoal Agents,	Yes	No
Antipyrine	2.28e-07	69	Analgesics, Analgesics, Non-Narcotic, Anti-Inflammatory Agents, Anti-Inflammatory Agents, Non-Steroidal, Antirheumatic Agents, Peripheral Nervous System Agents, Sensory System Agents,	Yes	No
Fulvestrant	2.33e-07	45	Antineoplastic Agents, Antineoplastic Agents, Hormonal, Estrogen Receptor Modulators, Estrogen Antagonists, Hormone Antagonists, Hormones, Hormone Substitutes, and Hormone Antagonists,	Yes	Yes
Practolol	3.11e-07	10	Adrenergic Agents, Adrenergic Antagonists, Adrenergic beta-Antagonists, Anti-Arrhythmia Agents, Cardiovascular Agents, Neurotransmitter Agents,	No	No
Luciferases	3.44e-07	4392	Luminescent Agents, Indicators and Reagents,	Yes	No
Deoxycholic Acid	3.49e-07	78	Cholagogues and Choleretics, Gastrointestinal Agents,	Yes	No
Milrinone	3.49e-07	16	Cardiotonic Agents, Cardiovascular Agents, Enzyme Inhibitors, Protective Agents, Hematologic Agents, Phosphodiesterase Inhibitors, Platelet Aggregation Inhibitors, Vasodilator Agents,	No	No
Pulmonary Surfactant-Associated Protein A	3.53e-07	20	Pulmonary Surfactants, Respiratory System Agents,	No	No
Hydrochlorothiazide	3.77e-07	68	Antihypertensive Agents, Cardiovascular Agents, Diuretics, Membrane Transport Modulators, Natriuretic Agents, Sodium Chloride Symporter Inhibitors,	No	No
Terbinafine	3.97e-07	13	Anti-Infective Agents, Antifungal Agents, Enzyme Inhibitors,	No	No
Beta-Defensins	4.07e-07	31	Anti-Infective Agents,	No	No
Ras Gtpase-Activating Proteins	4.64e-07	1042	Enzyme Activators, GTP Phosphohydrolase Activators,	Yes	No
Picibanil	4.94e-07	128	Antineoplastic Agents,	Yes	No
Pilocarpine	5.06e-07	130	Autonomic Agents, Cholinergic Agents, Cholinergic Agonists, Miotics, Muscarinic Agonists, Peripheral Nervous System Agents, Neurotransmitter Agents,	No	No
Ferric Compounds	5.52e-07	176	Hematinics, Hematologic Agents,	Yes	No
Gadolinium Dtpa	6.9e-07	66	Contrast Media,	Yes	No
Ropivacaine	7.05e-07	16	Anesthetics, Anesthetics, Local, Central Nervous System Depressants, Central Nervous System Agents, Peripheral Nervous System Agents, Sensory System Agents,	No	No
Plicamycin	7.29e-07	70	Antibiotics, Antineoplastic, Antineoplastic Agents, Coloring Agents, Enzyme Inhibitors, Fluorescent Dyes, Luminescent Agents, Nucleic Acid Synthesis Inhibitors, Protein Synthesis Inhibitors, Indicators and Reagents,	Yes	No
Hydroxychloroquine	7.32e-07	21	Anti-Infective Agents, Antimalarials, Antiparasitic Agents, Antiprotozoal Agents, Antirheumatic Agents, Enzyme Inhibitors,	No	No
Ethinyl Estradiol	7.58e-07	90	Estrogens, Hormones, Hormones, Hormone Substitutes, and Hormone Antagonists,	Yes	Yes
Sulfadoxine	8.73e-07	13	Anti-Infective Agents, Anti-Infective Agents, Urinary, Antimalarials, Antiparasitic Agents, Antiprotozoal Agents, Renal Agents,	No	No
Cetrorelix	9.11e-07	14	Hormone Antagonists, Hormones, Hormone Substitutes, and Hormone Antagonists,	No	No
Eflornithine	9.79e-07	35	Anti-Infective Agents, Antineoplastic Agents, Antiparasitic Agents, Antiprotozoal Agents, Enzyme Inhibitors, Trypanocidal Agents,	Yes	No
Pentetic Acid	9.92e-07	68	Antidotes, Chelating Agents, Protective Agents, Iron Chelating Agents,	Yes	No
Norfloxacin	1.01e-06	106	Anti-Infective Agents, Anti-Bacterial Agents, Enzyme Inhibitors, Nucleic Acid Synthesis Inhibitors,	No	No
Perindopril	1.01e-06	14	Angiotensin-Converting Enzyme Inhibitors, Antihypertensive Agents, Cardiovascular Agents, Enzyme Inhibitors, Protease Inhibitors,	No	No
Adalimumab	1.06e-06	18	Anti-Inflammatory Agents, Antirheumatic Agents,	No	No
Famciclovir	1.2e-06	8	Anti-Infective Agents, Antiviral Agents,	No	No
Ng-Nitroarginine Methyl Ester	1.21e-06	238	Enzyme Inhibitors,	Yes	No
Galantamine	1.26e-06	16	Autonomic Agents, Central Nervous System Agents, Cholinergic Agents, Cholinesterase Inhibitors, Enzyme Inhibitors, Parasympathomimetics, Peripheral Nervous System Agents, Neurotransmitter Agents, Nootropic Agents,	No	No
Interferon Type Ii	1.3e-06	4244	Anti-Infective Agents, Antiviral Agents,	Yes	No
Sodium Citrate	1.32e-06	33	Buffers,	No	No
Acetone	1.35e-06	26	Solvents,	Yes	No
Famotidine	1.35e-06	24	Anti-Ulcer Agents, Gastrointestinal Agents, Histamine Agents, Neurotransmitter Agents, Histamine Antagonists, Histamine H2 Antagonists,	No	No
Ditiocarb	1.44e-06	28	Adjuvants, Immunologic, Anti-Infective Agents, Antiviral Agents, Chelating Agents, Immunologic Factors,	Yes	No
Mesalamine	1.45e-06	9	Analgesics, Analgesics, Non-Narcotic, Anti-Inflammatory Agents, Non-Steroidal, Anti-Inflammatory Agents, Antirheumatic Agents, Peripheral Nervous System Agents, Sensory System Agents,	No	No
Pimecrolimus	1.56e-06	8	Analgesics, Analgesics, Non-Narcotic, Anti-Inflammatory Agents, Non-Steroidal, Anti-Inflammatory Agents, Antirheumatic Agents, Dermatologic Agents, Immunologic Factors, Immunosuppressive Agents, Peripheral Nervous System Agents, Sensory System Agents,	No	No
Immunoglobulin Idiotypes	1.61e-06	441	Immunologic Factors,	Yes	No
Pulmonary Surfactant-Associated Proteins	1.69e-06	23	Pulmonary Surfactants, Respiratory System Agents,	No	No
Terfenadine	1.69e-06	27	Histamine Agents, Histamine Antagonists, Histamine H1 Antagonists, Histamine H1 Antagonists, Non-Sedating, Neurotransmitter Agents,	No	No
Foscarnet	1.7e-06	28	Anti-Infective Agents, Anti-Retroviral Agents, Antiviral Agents, Enzyme Inhibitors, Nucleic Acid Synthesis Inhibitors, Reverse Transcriptase Inhibitors,	No	No
Talc	1.94e-06	13	Antiperspirants, Cosmetics,	Yes	No
Silicon	2.08e-06	49	Micronutrients, Growth Substances, Trace Elements,	Yes	No
Kallikreins	2.11e-06	43	Coagulants, Fertility Agents, Fertility Agents, Male, Hematologic Agents, Reproductive Control Agents,	Yes	No
Stavudine	2.15e-06	41	Anti-HIV Agents, Anti-Infective Agents, Anti-Retroviral Agents, Antimetabolites, Antiviral Agents, Enzyme Inhibitors, Noxae, Nucleic Acid Synthesis Inhibitors, Reverse Transcriptase Inhibitors,	No	No
Zinc Chloride	2.26e-06	20	Cosmetics, Mouthwashes,	No	No
Epoetin Alfa	2.29e-06	14	Hematinics, Hematologic Agents,	Yes	No
Polymyxin B	2.29e-06	110	Anti-Infective Agents, Anti-Bacterial Agents,	No	No
Dactinomycin	2.4e-06	925	Anti-Bacterial Agents, Anti-Infective Agents, Antibiotics, Antineoplastic, Antineoplastic Agents, Enzyme Inhibitors, Nucleic Acid Synthesis Inhibitors, Protein Synthesis Inhibitors,	Yes	No
Hepatitis B Antibodies	2.4e-06	83	Immunologic Factors,	Yes	No
Neostigmine	2.44e-06	43	Autonomic Agents, Cholinergic Agents, Cholinesterase Inhibitors, Enzyme Inhibitors, Parasympathomimetics, Peripheral Nervous System Agents, Neurotransmitter Agents,	No	No
Corticotropin-Releasing Hormone	2.46e-06	381	Hormones, Hormones, Hormone Substitutes, and Hormone Antagonists,	Yes	No
Nortriptyline	3.1e-06	9	Adrenergic Agents, Adrenergic Uptake Inhibitors, Antidepressive Agents, Antidepressive Agents, Tricyclic, Central Nervous System Agents, Neurotransmitter Agents, Neurotransmitter Uptake Inhibitors, Psychotropic Drugs,	Yes	No
Enfuvirtide	3.1e-06	22	Anti-Infective Agents, Anti-HIV Agents, Anti-Retroviral Agents, Antiviral Agents, HIV Fusion Inhibitors,	No	No
Complement C1	3.13e-06	25	Immunologic Factors,	Yes	No
Gamma-Globulins	3.4e-06	98	Immunologic Factors,	Yes	No
Montelukast	3.49e-06	17	Anti-Asthmatic Agents, Hormones, Hormone Substitutes, and Hormone Antagonists, Hormone Antagonists, Leukotriene Antagonists, Respiratory System Agents,	No	No
Taurocholic Acid	3.52e-06	26	Cholagogues and Choleretics, Detergents, Surface-Active Agents, Gastrointestinal Agents,	No	No
Alpha-Msh	3.64e-06	29	Hormones, Hormones, Hormone Substitutes, and Hormone Antagonists,	No	No
Metrizamide	3.65e-06	18	Contrast Media,	No	No
Bcg Vaccine	3.67e-06	68	Adjuvants, Immunologic, Immunologic Factors,	Yes	No
Probucol	3.76e-06	20	Anticholesteremic Agents, Antilipemic Agents, Antimetabolites, Antioxidants, Protective Agents,	No	No
Prenylamine	3.81e-06	12	Adrenergic Agents, Calcium Channel Blockers, Cardiovascular Agents, Membrane Transport Modulators, Neurotransmitter Agents, Vasodilator Agents,	No	No
Rhodamine 123	3.84e-06	79	Coloring Agents, Fluorescent Dyes, Luminescent Agents, Indicators and Reagents,	Yes	No
Fluoresceins	3.9e-06	177	Coloring Agents, Fluorescent Dyes, Luminescent Agents, Indicators and Reagents,	Yes	No
Cilastatin	3.96e-06	16	Enzyme Inhibitors, Protease Inhibitors,	No	No
Finasteride	3.97e-06	49	Enzyme Inhibitors,	Yes	No
Cefotaxime	4.1e-06	164	Anti-Bacterial Agents, Anti-Infective Agents,	Yes	No
Isotretinoin	4.12e-06	13	Dermatologic Agents, Noxae, Teratogens,	Yes	No
Netilmicin	4.35e-06	12	Anti-Infective Agents, Anti-Bacterial Agents, Enzyme Inhibitors, Protein Synthesis Inhibitors,	No	No
Oxprenolol	4.46e-06	10	Adrenergic Agents, Adrenergic Antagonists, Adrenergic beta-Antagonists, Anti-Anxiety Agents, Anti-Arrhythmia Agents, Antihypertensive Agents, Autonomic Agents, Cardiovascular Agents, Central Nervous System Agents, Central Nervous System Depressants, Peripheral Nervous System Agents, Neurotransmitter Agents, Sympatholytics, Tranquilizing Agents, Psychotropic Drugs, Vasodilator Agents,	No	No
Irinotecan	4.82e-06	268	Antineoplastic Agents, Antineoplastic Agents, Phytogenic, Enzyme Inhibitors,	No	No
Linezolid	4.83e-06	22	Anti-Infective Agents, Enzyme Inhibitors, Protein Synthesis Inhibitors,	No	No
Levocabastine	5.31e-06	7	Histamine Agents, Histamine Antagonists, Neurotransmitter Agents, Histamine H1 Antagonists, Histamine H1 Antagonists, Non-Sedating,	No	No
Pralidoxime	5.33e-06	13	Antidotes, Cholinergic Agents, Cholinesterase Reactivators, Enzyme Reactivators, Protective Agents, Neurotransmitter Agents,	No	No
Carbamazepine	5.64e-06	178	Analgesics, Analgesics, Non-Narcotic, Anticonvulsants, Antimanic Agents, Central Nervous System Agents, Central Nervous System Depressants, Peripheral Nervous System Agents, Tranquilizing Agents, Psychotropic Drugs, Sensory System Agents,	No	No
Lenograstim	5.74e-06	9	Adjuvants, Immunologic, Immunologic Factors,	No	No
Salmeterol	6.01e-06	55	Adrenergic Agents, Adrenergic Agonists, Adrenergic beta-Agonists, Anti-Asthmatic Agents, Autonomic Agents, Bronchodilator Agents, Peripheral Nervous System Agents, Neurotransmitter Agents, Respiratory System Agents,	No	No
Methylphenidate	6.21e-06	50	Central Nervous System Agents, Central Nervous System Stimulants, Dopamine Agents, Dopamine Uptake Inhibitors, Neurotransmitter Agents, Neurotransmitter Uptake Inhibitors,	No	No
Alpha 1-Antitrypsin	6.28e-06	331	Enzyme Inhibitors, Protease Inhibitors, Serine Proteinase Inhibitors, Trypsin Inhibitors,	Yes	No
Fluphenazine	6.3e-06	47	Antipsychotic Agents, Central Nervous System Agents, Central Nervous System Depressants, Dopamine Agents, Dopamine Antagonists, Neurotransmitter Agents, Tranquilizing Agents, Psychotropic Drugs,	No	No
2-Acetylaminofluorene	6.46e-06	133	Carcinogens, Noxae,	No	No
Betahistine	7.14e-06	7	Cardiovascular Agents, Neurotransmitter Agents, Histamine Agents, Histamine Agonists, Vasodilator Agents,	No	No
Mycophenolic Acid	8.09e-06	214	Antibiotics, Antineoplastic, Antineoplastic Agents, Enzyme Inhibitors,	Yes	No
Acetaminophen	8.13e-06	266	Analgesics, Analgesics, Non-Narcotic, Central Nervous System Agents, Peripheral Nervous System Agents, Sensory System Agents,	Yes	No
Zalcitabine	8.55e-06	11	Anti-HIV Agents, Anti-Infective Agents, Anti-Retroviral Agents, Antimetabolites, Antiviral Agents, Enzyme Inhibitors, Noxae, Nucleic Acid Synthesis Inhibitors, Reverse Transcriptase Inhibitors,	No	No
Desogestrel	8.67e-06	13	Contraceptive Agents, Contraceptive Agents, Female, Contraceptives, Oral, Contraceptives, Oral, Synthetic, Hormones, Hormones, Hormone Substitutes, and Hormone Antagonists, Progestins, Reproductive Control Agents,	Yes	No
Ethyl Chloride	1.01e-05	4	Anesthetics, Anesthetics, Local, Central Nervous System Agents, Central Nervous System Depressants, Peripheral Nervous System Agents, Sensory System Agents,	No	No
Xenon	1.04e-05	86	Anesthetics, Anesthetics, General, Anesthetics, Inhalation, Central Nervous System Depressants, Central Nervous System Agents,	No	No
Daptomycin	1.06e-05	9	Anti-Bacterial Agents, Anti-Infective Agents,	No	No
Complement C4B	1.1e-05	29	Immunologic Factors,	No	No
Fenretinide	1.13e-05	21	Anticarcinogenic Agents, Antineoplastic Agents, Protective Agents,	Yes	No
Immunoglobulin J-Chains	1.17e-05	26	Immunologic Factors,	No	No
Pamidronate	1.24e-05	44	Bone Density Conservation Agents,	No	No
Freund's Adjuvant	1.27e-05	15	Adjuvants, Immunologic, Immunologic Factors,	Yes	No
Bumetanide	1.27e-05	115	Diuretics, Membrane Transport Modulators, Natriuretic Agents, Sodium Potassium Chloride Symporter Inhibitors,	No	No
Oxazepam	1.29e-05	17	Anti-Anxiety Agents, Central Nervous System Agents, Central Nervous System Depressants, GABA Agents, GABA Modulators, Hypnotics and Sedatives, Neurotransmitter Agents, Tranquilizing Agents, Psychotropic Drugs,	No	No
Digitoxin	1.36e-05	16	Anti-Arrhythmia Agents, Cardiotonic Agents, Cardiovascular Agents, Enzyme Inhibitors, Protective Agents,	Yes	No
Mazindol	1.49e-05	9	Adrenergic Agents, Adrenergic Uptake Inhibitors, Central Nervous System Agents, Central Nervous System Stimulants, Dopamine Agents, Dopamine Uptake Inhibitors, Neurotransmitter Agents, Neurotransmitter Uptake Inhibitors,	No	No
Tegafur	1.6e-05	184	Antimetabolites, Antimetabolites, Antineoplastic, Antineoplastic Agents, Noxae,	Yes	No
Gemfibrozil	1.67e-05	48	Antilipemic Agents, Antimetabolites,	No	No
Cycloserine	1.69e-05	41	Anti-Bacterial Agents, Anti-Infective Agents, Anti-Infective Agents, Urinary, Antibiotics, Antitubercular, Antimetabolites, Antitubercular Agents, Noxae, Renal Agents,	No	No
Complement C3	1.75e-05	236	Immunologic Factors,	Yes	No
Polychlorinated Biphenyls	1.75e-05	248	Environmental Pollutants,	Yes	No
S-Nitroso-N-Acetylpenicillamine	1.88e-05	13	Cardiovascular Agents, Enzyme Inhibitors, Nitric Oxide Donors, Vasodilator Agents,	Yes	No
Ampicillin	1.93e-05	316	Anti-Bacterial Agents, Anti-Infective Agents,	Yes	No
Pyridoxal Phosphate	1.93e-05	42	Micronutrients, Growth Substances, Vitamin B Complex, Vitamins,	Yes	No
Coumarins	1.97e-05	164	Anticoagulants, Antineoplastic Agents, Hematologic Agents, Indicators and Reagents,	Yes	No
Chlormethiazole	2.01e-05	18	Anticonvulsants, Central Nervous System Agents, Central Nervous System Depressants, GABA Agents, GABA Modulators, Hypnotics and Sedatives, Protective Agents, Neuroprotective Agents, Neurotransmitter Agents,	No	No
Didanosine	2.04e-05	51	Anti-Infective Agents, Anti-HIV Agents, Anti-Retroviral Agents, Antimetabolites, Antiviral Agents, Enzyme Inhibitors, Noxae, Nucleic Acid Synthesis Inhibitors, Reverse Transcriptase Inhibitors,	No	No
Amantadine	2.1e-05	33	Analgesics, Analgesics, Non-Narcotic, Anti-Infective Agents, Anti-Dyskinesia Agents, Antiparkinson Agents, Antiviral Agents, Central Nervous System Agents, Dopamine Agents, Peripheral Nervous System Agents, Neurotransmitter Agents, Sensory System Agents,	No	No
Phenolphthalein	2.1e-05	13	Indicators and Reagents,	No	No
Symbicort	2.15e-05	6	Anti-Asthmatic Agents, Respiratory System Agents,	No	No
Felbamate	2.19e-05	25	Anticonvulsants, Central Nervous System Agents,	No	No
Razoxane	2.25e-05	22	Antineoplastic Agents, Cardiovascular Agents, Chelating Agents,	Yes	No
Pemetrexed	2.28e-05	15	Antimetabolites, Antimetabolites, Antineoplastic, Antineoplastic Agents, Enzyme Inhibitors, Folic Acid Antagonists, Noxae,	No	No
Alpha-Tocopherol	2.38e-05	35	Antioxidants, Protective Agents, Micronutrients, Growth Substances, Vitamins,	Yes	No
Carbon Monoxide	2.38e-05	96	Antimetabolites, Noxae,	Yes	No
Physostigmine	2.45e-05	94	Autonomic Agents, Cholinergic Agents, Cholinesterase Inhibitors, Enzyme Inhibitors, Miotics, Peripheral Nervous System Agents, Neurotransmitter Agents,	No	No
Minoxidil	2.49e-05	14	Antihypertensive Agents, Cardiovascular Agents, Vasodilator Agents,	Yes	No
Mirtazapine	2.62e-05	11	Adrenergic alpha-Antagonists, Adrenergic Agents, Adrenergic Antagonists, Antidepressive Agents, Antidepressive Agents, Tricyclic, Central Nervous System Agents, Histamine Agents, Histamine Antagonists, Neurotransmitter Agents, Histamine H1 Antagonists, Psychotropic Drugs,	No	No
Nimustine	2.64e-05	54	Antineoplastic Agents,	Yes	No
Pindolol	2.75e-05	82	Adrenergic Agents, Adrenergic Antagonists, Adrenergic beta-Antagonists, Antihypertensive Agents, Cardiovascular Agents, Neurotransmitter Agents, Serotonin Agents, Serotonin Antagonists, Vasodilator Agents,	No	No
Scopolamine	2.75e-05	132	Adjuvants, Anesthesia, Autonomic Agents, Cholinergic Agents, Central Nervous System Agents, Cholinergic Antagonists, Muscarinic Antagonists, Mydriatics, Peripheral Nervous System Agents, Neurotransmitter Agents,	No	No
Adrenomedullin	2.78e-05	54	Anti-Asthmatic Agents, Antihypertensive Agents, Autonomic Agents, Cardiotonic Agents, Cardiovascular Agents, Bronchodilator Agents, Protective Agents, Peripheral Nervous System Agents, Vasodilator Agents, Respiratory System Agents,	Yes	No
Diazepam	2.85e-05	304	Adjuvants, Anesthesia, Anesthetics, Anesthetics, General, Anesthetics, Intravenous, Anti-Anxiety Agents, Anticonvulsants, Antiemetics, Autonomic Agents, Central Nervous System Agents, Central Nervous System Depressants, GABA Agents, GABA Modulators, Gastrointestinal Agents, Hypnotics and Sedatives, Muscle Relaxants, Central, Neuromuscular Agents, Peripheral Nervous System Agents, Neurotransmitter…	Yes	No
Genistein	2.91e-05	760	Anticarcinogenic Agents, Antineoplastic Agents, Estrogens, Estrogens, Non-Steroidal, Enzyme Inhibitors, Protective Agents, Protein Kinase Inhibitors, Hormones, Phytoestrogens, Hormones, Hormone Substitutes, and Hormone Antagonists,	Yes	No
Edetic Acid	2.96e-05	256	Anticoagulants, Chelating Agents, Food Additives, Hematologic Agents,	Yes	No
Epoprostenol	2.97e-05	176	Antihypertensive Agents, Cardiovascular Agents, Hematologic Agents, Platelet Aggregation Inhibitors,	Yes	No
Pramlintide	2.97e-05	7	Hypoglycemic Agents,	No	No
Beta-Endorphin	2.99e-05	88	Neurotransmitter Agents,	Yes	No
Medroxyprogesterone	3.02e-05	221	Contraceptive Agents, Contraceptive Agents, Female, Contraceptives, Oral, Contraceptives, Oral, Synthetic, Reproductive Control Agents,	Yes	No
Enflurane	3.02e-05	39	Anesthetics, Anesthetics, General, Anesthetics, Inhalation, Central Nervous System Agents, Central Nervous System Depressants,	No	No
Thimerosal	3.06e-05	35	Pharmaceutic Aids, Preservatives, Pharmaceutical,	No	No
Topotecan	3.08e-05	271	Antineoplastic Agents, Enzyme Inhibitors,	Yes	No
Desoxycorticosterone	3.36e-05	45	Mineralocorticoids, Hormones, Hormones, Hormone Substitutes, and Hormone Antagonists,	Yes	No
Ephedrine	3.5e-05	24	Adrenergic Agents, Autonomic Agents, Cardiovascular Agents, Central Nervous System Agents, Central Nervous System Stimulants, Peripheral Nervous System Agents, Neurotransmitter Agents, Sympathomimetics, Vasoconstrictor Agents,	No	No
Bethanechol	3.59e-05	32	Autonomic Agents, Cholinergic Agents, Cholinergic Agonists, Muscarinic Agonists, Parasympathomimetics, Peripheral Nervous System Agents, Neurotransmitter Agents,	No	No
Immunoglobulin Constant Regions	3.61e-05	74	Immunologic Factors,	Yes	No
Carotenoids	3.63e-05	36	Antioxidants, Protective Agents,	Yes	No
Cocaine	3.67e-05	128	Anesthetics, Anesthetics, Local, Cardiovascular Agents, Central Nervous System Agents, Central Nervous System Depressants, Dopamine Agents, Dopamine Uptake Inhibitors, Peripheral Nervous System Agents, Neurotransmitter Agents, Neurotransmitter Uptake Inhibitors, Vasoconstrictor Agents, Sensory System Agents,	No	No
Trimetrexate	3.71e-05	22	Anti-Infective Agents, Antifungal Agents, Antimetabolites, Antimetabolites, Antineoplastic, Antineoplastic Agents, Enzyme Inhibitors, Folic Acid Antagonists, Noxae,	Yes	No
Verteporfin	3.82e-05	19	Dermatologic Agents, Photosensitizing Agents, Radiation-Sensitizing Agents,	No	No
Trifluoperazine	4.08e-05	275	Antiemetics, Autonomic Agents, Antipsychotic Agents, Central Nervous System Depressants, Central Nervous System Agents, Dopamine Agents, Dopamine Antagonists, Peripheral Nervous System Agents, Neurotransmitter Agents, Gastrointestinal Agents, Tranquilizing Agents, Psychotropic Drugs,	Yes	No
Rizatriptan	4.12e-05	6	Neurotransmitter Agents, Serotonin Agents, Serotonin Agonists,	No	No
Dihydroergotamine	4.19e-05	11	Analgesics, Analgesics, Non-Narcotic, Cardiovascular Agents, Central Nervous System Agents, Dopamine Agents, Dopamine Agonists, Peripheral Nervous System Agents, Neurotransmitter Agents, Vasoconstrictor Agents, Sensory System Agents,	No	No
Immunoglobulin D	4.41e-05	48	Immunologic Factors,	Yes	No
Sulbactam	4.41e-05	39	Anti-Bacterial Agents, Anti-Infective Agents, Enzyme Inhibitors,	No	No
Hyaluronic Acid	4.65e-05	664	Adjuvants, Immunologic, Immunologic Factors,	Yes	No
Ipratropium	4.92e-05	33	Anti-Asthmatic Agents, Autonomic Agents, Bronchodilator Agents, Cholinergic Agents, Cholinergic Antagonists, Peripheral Nervous System Agents, Neurotransmitter Agents, Respiratory System Agents,	No	No
Salicylates	4.96e-05	28	Analgesics, Analgesics, Non-Narcotic, Anti-Inflammatory Agents, Non-Steroidal, Anti-Inflammatory Agents, Antirheumatic Agents, Cyclooxygenase Inhibitors, Enzyme Inhibitors, Peripheral Nervous System Agents, Sensory System Agents,	Yes	No
Corticosterone	5.07e-05	345	Anti-Inflammatory Agents,	Yes	No
Nifedipine	5.08e-05	542	Cardiovascular Agents, Calcium Channel Blockers, Membrane Transport Modulators, Tocolytic Agents, Vasodilator Agents, Reproductive Control Agents,	Yes	No
Immunoglobulin Gamma-Chains	5.13e-05	66	Immunologic Factors,	No	No
Abscisic Acid	5.48e-05	26	Plant Growth Regulators, Growth Substances,	No	No
Loperamide	5.89e-05	34	Antidiarrheals, Gastrointestinal Agents,	No	No
Plasminogen Inactivators	6.15e-05	317	Enzyme Inhibitors, Protease Inhibitors, Serine Proteinase Inhibitors,	Yes	No
Dimercaprol	6.31e-05	10	Chelating Agents,	No	No
Iodine	6.52e-05	621	Anti-Infective Agents, Anti-Infective Agents, Local, Micronutrients, Growth Substances, Trace Elements,	Yes	No
Atractyloside	6.85e-05	58	Enzyme Inhibitors,	No	No
Enoxaparin	6.89e-05	19	Anticoagulants, Cardiovascular Agents, Fibrinolytic Agents, Fibrin Modulating Agents, Hematologic Agents,	No	No
Riluzole	6.92e-05	31	Anticonvulsants, Central Nervous System Agents, Excitatory Amino Acid Agents, Excitatory Amino Acid Antagonists, Protective Agents, Neuroprotective Agents, Neurotransmitter Agents,	No	No
Indapamide	7.02e-05	11	Antihypertensive Agents, Cardiovascular Agents, Diuretics, Natriuretic Agents,	No	No
Cosyntropin	7.04e-05	7	Hormones, Hormones, Hormone Substitutes, and Hormone Antagonists,	Yes	No
Ticarcillin	7.24e-05	13	Anti-Bacterial Agents, Anti-Infective Agents,	No	No
Telithromycin	7.32e-05	81	Anti-Bacterial Agents, Anti-Infective Agents,	No	No
Diphosphonates	7.7e-05	99	Bone Density Conservation Agents,	Yes	No
Gentamicins	7.89e-05	24	Anti-Bacterial Agents, Anti-Infective Agents, Enzyme Inhibitors, Protein Synthesis Inhibitors,	Yes	No
Sulfadiazine	8.04e-05	16	Anti-Infective Agents, Antiparasitic Agents, Antiprotozoal Agents, Coccidiostats,	No	No
Ziprasidone	8.11e-05	14	Antipsychotic Agents, Central Nervous System Agents, Central Nervous System Depressants, Dopamine Agents, Dopamine Antagonists, Neurotransmitter Agents, Serotonin Agents, Serotonin Antagonists, Tranquilizing Agents, Psychotropic Drugs,	No	No
Botulinum Toxin Type A	8.19e-05	34	Noxae, Neuromuscular Agents, Peripheral Nervous System Agents, Neurotoxins,	Yes	No
Rosaniline Dyes	8.52e-05	13	Coloring Agents,	Yes	No
Mesna	8.53e-05	26	Protective Agents,	Yes	No
Marine Toxins	9.13e-05	13	Noxae, Poisons,	Yes	No
Oxacillin	9.17e-05	71	Anti-Infective Agents, Anti-Bacterial Agents,	No	No
S-Nitrosothiols	9.37e-05	58	Anti-Asthmatic Agents, Anti-Infective Agents, Autonomic Agents, Bronchodilator Agents, Cardiovascular Agents, Hematologic Agents, Peripheral Nervous System Agents, Platelet Aggregation Inhibitors, Nitric Oxide Donors, Vasodilator Agents, Respiratory System Agents,	No	No
Clomipramine	9.73e-05	34	Antidepressive Agents, Antidepressive Agents, Tricyclic, Central Nervous System Agents, Neurotransmitter Agents, Neurotransmitter Uptake Inhibitors, Serotonin Agents, Serotonin Uptake Inhibitors, Psychotropic Drugs,	No	No
Ifosfamide	0.000104222	161	Alkylating Agents, Antineoplastic Agents, Antineoplastic Agents, Alkylating, Noxae,	Yes	No
Methoxamine	0.000109666	72	Adrenergic Agonists, Adrenergic alpha-Agonists, Adrenergic Agents, Autonomic Agents, Cardiovascular Agents, Peripheral Nervous System Agents, Neurotransmitter Agents, Sympathomimetics, Vasoconstrictor Agents,	No	No
Trandolapril	0.00011366	8	Angiotensin-Converting Enzyme Inhibitors, Antihypertensive Agents, Cardiovascular Agents, Enzyme Inhibitors, Protease Inhibitors,	No	No
Flunitrazepam	0.000116593	35	Anti-Anxiety Agents, Central Nervous System Agents, Central Nervous System Depressants, GABA Agents, GABA Modulators, Neurotransmitter Agents, Tranquilizing Agents, Psychotropic Drugs,	No	No
Droperidol	0.000118578	22	Adjuvants, Anesthesia, Antiemetics, Antipsychotic Agents, Autonomic Agents, Central Nervous System Agents, Central Nervous System Depressants, Dopamine Agents, Dopamine Antagonists, Gastrointestinal Agents, Peripheral Nervous System Agents, Neurotransmitter Agents, Tranquilizing Agents, Psychotropic Drugs,	Yes	No
Plasminogen	0.00012005	88	Cardiovascular Agents, Fibrinolytic Agents, Fibrin Modulating Agents, Hematologic Agents,	Yes	No
Omega-N-Methylarginine	0.000120632	50	Enzyme Inhibitors,	Yes	No
Lysergic Acid Diethylamide	0.000121212	11	Central Nervous System Agents, Hallucinogens, Neurotransmitter Agents, Serotonin Agents, Serotonin Agonists, Serotonin Antagonists, Psychotropic Drugs,	No	No
Tetraethylammonium	0.000122554	59	Cardiovascular Agents, Membrane Transport Modulators, Potassium Channel Blockers,	Yes	No
Cefadroxil	0.000125516	7	Anti-Bacterial Agents, Anti-Infective Agents,	No	No
Rifabutin	0.000126059	63	Anti-Bacterial Agents, Anti-Infective Agents, Antibiotics, Antitubercular, Antitubercular Agents,	Yes	No
Cephalosporins	0.000126059	170	Anti-Bacterial Agents, Anti-Infective Agents,	No	No
Immune Sera	0.000126175	823	Immunologic Factors,	Yes	No
Fibrin Fibrinogen Degradation Products	0.000128356	31	Anticoagulants, Hematologic Agents,	Yes	No
Celiprolol	0.000131342	8	Adrenergic Agents, Adrenergic Antagonists, Adrenergic beta-Antagonists, Anti-Arrhythmia Agents, Antihypertensive Agents, Autonomic Agents, Cardiovascular Agents, Peripheral Nervous System Agents, Neurotransmitter Agents, Sympatholytics, Vasodilator Agents,	No	No
Methimazole	0.000131342	72	Antithyroid Agents, Hormones, Hormone Substitutes, and Hormone Antagonists, Hormone Antagonists,	No	No
Dexfenfluramine	0.000132117	7	Neurotransmitter Agents, Serotonin Agents, Serotonin Agonists,	No	No
Eosinophil Granule Proteins	0.000135697	18	Immunologic Factors,	Yes	No
Fluvoxamine	0.000151624	26	Anti-Anxiety Agents, Antidepressive Agents, Antidepressive Agents, Second-Generation, Central Nervous System Agents, Central Nervous System Depressants, Neurotransmitter Agents, Neurotransmitter Uptake Inhibitors, Serotonin Agents, Serotonin Uptake Inhibitors, Tranquilizing Agents, Psychotropic Drugs,	No	No
Colchicine	0.000153238	156	Antimitotic Agents, Antirheumatic Agents, Mitosis Modulators, Gout Suppressants, Tubulin Modulators,	Yes	No
Nisoldipine	0.000157776	18	Antihypertensive Agents, Cardiovascular Agents, Calcium Channel Blockers, Membrane Transport Modulators, Vasodilator Agents,	No	No
Brefeldin A	0.00017312	212	Anti-Bacterial Agents, Anti-Infective Agents, Antifungal Agents, Antiviral Agents, Enzyme Inhibitors, Protein Synthesis Inhibitors,	Yes	No
Basiliximab	0.000183047	9	Immunologic Factors, Immunosuppressive Agents,	No	No
Dichlorodiphenyl Dichloroethylene	0.000185734	16	Pesticides, Insecticides,	Yes	No
Halofantrine	0.000185734	7	Anti-Infective Agents, Antimalarials, Antiparasitic Agents, Antiprotozoal Agents,	No	No
Decitabine	0.000188207	37	Antimetabolites, Antimetabolites, Antineoplastic, Antineoplastic Agents, Enzyme Inhibitors, Noxae, Teratogens,	No	No
Camphor	0.00020442	18	Anti-Infective Agents, Anti-Infective Agents, Local,	Yes	No
Edrophonium	0.000208123	14	Antidotes, Cholinergic Agents, Cholinesterase Inhibitors, Enzyme Inhibitors, Protective Agents, Neurotransmitter Agents,	No	No
Fenfluramine	0.000209615	23	Neurotransmitter Agents, Neurotransmitter Uptake Inhibitors, Serotonin Agents, Serotonin Uptake Inhibitors,	No	No
Clofazimine	0.000210985	6	Analgesics, Analgesics, Non-Narcotic, Anti-Bacterial Agents, Anti-Infective Agents, Anti-Inflammatory Agents, Anti-Inflammatory Agents, Non-Steroidal, Antirheumatic Agents, Coloring Agents, Peripheral Nervous System Agents, Leprostatic Agents, Sensory System Agents,	No	No
Emla	0.000212162	9	Anesthetics, Anesthetics, Combined, Anesthetics, Local, Central Nervous System Agents, Central Nervous System Depressants, Noxae, Oxidants, Peripheral Nervous System Agents, Sensory System Agents,	No	No
Methylnitrosourea	0.000215341	114	Alkylating Agents, Noxae,	Yes	No
Carnitine	0.000222475	47	Micronutrients, Growth Substances, Vitamin B Complex, Vitamins,	Yes	No
Anthralin	0.000224526	12	Dermatologic Agents,	No	No
Complement C3D	0.000233858	91	Immunologic Factors,	No	No
Amodiaquine	0.000254055	13	Anti-Infective Agents, Antimalarials, Antiparasitic Agents, Antiprotozoal Agents,	No	No
Ropinirole	0.000266781	10	Anti-Dyskinesia Agents, Antiparkinson Agents, Central Nervous System Agents, Dopamine Agents, Dopamine Agonists, Neurotransmitter Agents,	No	No
Sodium Salicylate	0.000272127	24	Analgesics, Analgesics, Non-Narcotic, Anti-Inflammatory Agents, Non-Steroidal, Anti-Inflammatory Agents, Antirheumatic Agents, Cyclooxygenase Inhibitors, Enzyme Inhibitors, Peripheral Nervous System Agents, Sensory System Agents,	No	No
Tyramine	0.000280996	14	Adrenergic Agents, Adrenergic Uptake Inhibitors, Autonomic Agents, Peripheral Nervous System Agents, Neurotransmitter Agents, Neurotransmitter Uptake Inhibitors, Sympathomimetics,	Yes	No
Bacitracin	0.00029542	49	Anti-Bacterial Agents, Anti-Infective Agents, Anti-Infective Agents, Local,	Yes	No
Immunoglobulin Variable Region	0.000303306	356	Immunologic Factors,	Yes	No
Albendazole	0.000319822	37	Anthelmintics, Anti-Infective Agents, Anticestodal Agents, Antimitotic Agents, Antiparasitic Agents, Antiplatyhelmintic Agents, Antiprotozoal Agents, Mitosis Modulators, Tubulin Modulators,	No	No
Botulinum Toxins	0.000320165	309	Anti-Dyskinesia Agents, Central Nervous System Agents, Noxae, Poisons,	Yes	No
Debrisoquin	0.000342397	6	Adrenergic Agents, Antihypertensive Agents, Autonomic Agents, Cardiovascular Agents, Peripheral Nervous System Agents, Neurotransmitter Agents, Sympatholytics,	Yes	No
Lactose	0.000352922	64	Flavoring Agents, Food Additives, Sweetening Agents,	Yes	No
Furosemide	0.00035446	185	Diuretics, Membrane Transport Modulators, Natriuretic Agents, Sodium Potassium Chloride Symporter Inhibitors,	Yes	No
Alpha 1-Antichymotrypsin	0.000361092	19	Enzyme Inhibitors, Protease Inhibitors, Serine Proteinase Inhibitors,	Yes	No
Glyburide	0.000363676	96	Hypoglycemic Agents,	Yes	No
Reboxetine	0.000368905	7	Adrenergic Agents, Adrenergic Uptake Inhibitors, Antidepressive Agents, Central Nervous System Agents, Neurotransmitter Agents, Neurotransmitter Uptake Inhibitors, Psychotropic Drugs,	No	No
Reserpine	0.00037618	179	Adrenergic Agents, Adrenergic Uptake Inhibitors, Antihypertensive Agents, Antipsychotic Agents, Cardiovascular Agents, Central Nervous System Depressants, Central Nervous System Agents, Neurotransmitter Agents, Neurotransmitter Uptake Inhibitors, Tranquilizing Agents, Psychotropic Drugs,	Yes	No
Diethylcarbamazine	0.000405221	14	Anthelmintics, Anti-Infective Agents, Antinematodal Agents, Antiparasitic Agents, Enzyme Inhibitors, Filaricides, Lipoxygenase Inhibitors,	No	No
Pentazocine	0.000409115	18	Adjuvants, Anesthesia, Analgesics, Analgesics, Opioid, Central Nervous System Depressants, Central Nervous System Agents, Narcotic Antagonists, Narcotics, Peripheral Nervous System Agents, Sensory System Agents,	Yes	No
Trovafloxacin	0.000432444	48	Anti-Infective Agents,	No	No
Sertindole	0.000459379	7	Antipsychotic Agents, Central Nervous System Depressants, Central Nervous System Agents, Tranquilizing Agents, Psychotropic Drugs,	No	No
Oxotremorine	0.000478745	35	Cholinergic Agents, Cholinergic Agonists, Muscarinic Agonists, Neurotransmitter Agents,	No	No
Immunoglobulin Fc Fragments	0.000482634	111	Immunologic Factors,	Yes	No
Butyric Acid	0.000492077	54	Neurotransmitter Agents, Histamine Agents, Histamine Antagonists,	Yes	No
Cloxacillin	0.000494277	13	Anti-Bacterial Agents, Anti-Infective Agents,	No	No
Calcium Carbonate	0.000494381	73	Antacids,	Yes	No
Imipenem	0.00049508	224	Anti-Bacterial Agents, Anti-Infective Agents,	No	No
Cilazapril	0.00049725	9	Angiotensin-Converting Enzyme Inhibitors, Antihypertensive Agents, Cardiovascular Agents, Enzyme Inhibitors, Protease Inhibitors,	No	No
Thioctic Acid	0.000508671	14	Antioxidants, Micronutrients, Protective Agents, Growth Substances, Vitamin B Complex, Vitamins,	Yes	No
Nelfinavir	0.000519525	57	Anti-Infective Agents, Anti-HIV Agents, Anti-Retroviral Agents, Antiviral Agents, Enzyme Inhibitors, Protease Inhibitors, HIV Protease Inhibitors,	No	No
Complement Membrane Attack Complex	0.000533215	10	Immunologic Factors,	No	No
Iodixanol	0.000553201	18	Contrast Media,	No	No
Tuftsin	0.000565318	15	Immunologic Factors,	No	No
Motilin	0.000570851	25	Gastrointestinal Agents,	No	No
Formoterol	0.000606206	44	Adrenergic Agonists, Adrenergic Agents, Adrenergic beta-Agonists, Anti-Asthmatic Agents, Autonomic Agents, Bronchodilator Agents, Peripheral Nervous System Agents, Neurotransmitter Agents, Respiratory System Agents,	No	No
Carbenoxolone	0.000630164	28	Anti-Ulcer Agents, Gastrointestinal Agents,	No	No
Tolfenamic Acid	0.000634067	10	Analgesics, Analgesics, Non-Narcotic, Anti-Inflammatory Agents, Anti-Inflammatory Agents, Non-Steroidal, Antirheumatic Agents, Calcium Channel Blockers, Cardiovascular Agents, Central Nervous System Agents, Hormones, Hormone Substitutes, and Hormone Antagonists, Membrane Transport Modulators, Peripheral Nervous System Agents, Hormone Antagonists, Neurotransmitter Agents, Prostaglandin Antagonists…	No	No
Levonorgestrel	0.000665257	39	Contraceptive Agents, Contraceptive Agents, Female, Contraceptives, Oral, Contraceptives, Oral, Synthetic, Reproductive Control Agents,	Yes	No
Poly I-C	0.000670153	185	Anti-Infective Agents, Antiviral Agents, Immunologic Factors, Interferon Inducers,	Yes	No
Spectinomycin	0.000688546	45	Anti-Bacterial Agents, Anti-Infective Agents,	No	No
Technetium Tc 99M Sestamibi	0.000704564	34	Indicators and Reagents, Radiopharmaceuticals,	Yes	No
Lomustine	0.000728601	52	Alkylating Agents, Antineoplastic Agents, Alkylating, Antineoplastic Agents, Noxae,	Yes	Yes
Azoxymethane	0.000760455	30	Carcinogens, Noxae,	No	No
Xamoterol	0.000767544	6	Adrenergic Agents, Adrenergic Agonists, Adrenergic beta-Agonists, Neurotransmitter Agents,	No	No
Ranitidine	0.000799629	123	Anti-Ulcer Agents, Gastrointestinal Agents, Histamine Agents, Histamine Antagonists, Histamine H2 Antagonists, Neurotransmitter Agents,	Yes	No
2-Amino-5-Phosphonovalerate	0.000808385	17	Excitatory Amino Acid Agents, Excitatory Amino Acid Antagonists, Neurotransmitter Agents,	No	No
Iodocyanopindolol	0.000845307	22	Adrenergic Agents, Adrenergic Antagonists, Adrenergic beta-Antagonists, Neurotransmitter Agents,	No	No
Coenzyme Q10	0.000873682	33	Micronutrients, Growth Substances, Vitamins,	No	No
Egtazic Acid	0.000898816	677	Antidotes, Chelating Agents, Protective Agents,	Yes	No
Primidone	0.000927522	20	Anticonvulsants, Central Nervous System Agents,	No	No
Vitamin K 1	0.000951776	18	Antifibrinolytic Agents, Coagulants, Fibrin Modulating Agents, Micronutrients, Growth Substances, Hematologic Agents, Hemostatics, Vitamins,	No	No
Cefsulodin	0.000953757	23	Anti-Bacterial Agents, Anti-Infective Agents,	No	No
Zinostatin	0.00100078	26	Antibiotics, Antineoplastic, Antineoplastic Agents, Cytotoxins, Enzyme Inhibitors, Noxae, Nucleic Acid Synthesis Inhibitors,	Yes	No
Immunoglobulin Lambda-Chains	0.00100386	72	Immunologic Factors,	Yes	No
Iopromide	0.00101167	10	Contrast Media,	No	No
Furazolidone	0.00101574	13	Anti-Infective Agents, Anti-Infective Agents, Local, Anti-Infective Agents, Urinary, Antiparasitic Agents, Antiprotozoal Agents, Antitrichomonal Agents, Enzyme Inhibitors, Monoamine Oxidase Inhibitors, Renal Agents,	No	No
Complement C4	0.00106885	54	Immunologic Factors,	Yes	No
Clonidine	0.00109675	324	Adrenergic Agonists, Adrenergic alpha-Agonists, Adrenergic Agents, Analgesics, Antihypertensive Agents, Autonomic Agents, Cardiovascular Agents, Central Nervous System Agents, Peripheral Nervous System Agents, Neurotransmitter Agents, Sympatholytics, Sensory System Agents,	Yes	No
Thiamine	0.00109757	116	Micronutrients, Growth Substances, Vitamin B Complex, Vitamins,	Yes	No
Valacyclovir	0.00113645	9	Anti-Infective Agents, Antiviral Agents,	No	No
Gastrin-Releasing Peptide	0.00114203	18	Gastrointestinal Agents,	Yes	No
Neurokinin A	0.00115029	12	Neurotransmitter Agents,	No	No
Dehydroepiandrosterone	0.00115568	70	Adjuvants, Immunologic, Immunologic Factors,	Yes	No
Niacin	0.00115568	53	Antilipemic Agents, Antimetabolites, Cardiovascular Agents, Micronutrients, Growth Substances, Vasodilator Agents, Vitamin B Complex, Vitamins,	Yes	No
Cephalothin	0.00117731	44	Anti-Bacterial Agents, Anti-Infective Agents,	No	No
Busulfan	0.00119824	80	Alkylating Agents, Antineoplastic Agents, Antineoplastic Agents, Alkylating, Noxae, Immunologic Factors, Myeloablative Agonists, Immunosuppressive Agents,	Yes	No
Dihydroxyphenylalanine	0.00119824	10	Dopamine Agents, Neurotransmitter Agents,	Yes	No
Atomoxetine	0.00119887	8	Adrenergic Agents, Adrenergic Uptake Inhibitors, Neurotransmitter Agents, Neurotransmitter Uptake Inhibitors,	No	No
Phenoxybenzamine	0.00120067	61	Adrenergic Agents, Adrenergic alpha-Antagonists, Adrenergic Antagonists, Antihypertensive Agents, Cardiovascular Agents, Neurotransmitter Agents, Vasodilator Agents,	No	No
Aminophylline	0.00121558	46	Anti-Asthmatic Agents, Autonomic Agents, Cardiotonic Agents, Cardiovascular Agents, Bronchodilator Agents, Enzyme Inhibitors, Protective Agents, Peripheral Nervous System Agents, Phosphodiesterase Inhibitors, Respiratory System Agents,	Yes	No
Meperidine	0.00128372	21	Adjuvants, Anesthesia, Analgesics, Analgesics, Opioid, Central Nervous System Agents, Central Nervous System Depressants, Narcotics, Peripheral Nervous System Agents, Sensory System Agents,	No	No
Streptomycin	0.00129816	14	Anti-Bacterial Agents, Anti-Infective Agents, Enzyme Inhibitors, Protein Synthesis Inhibitors,	No	No
Ezetimibe	0.00133077	20	Anticholesteremic Agents, Antilipemic Agents, Antimetabolites,	No	No
Lupus Coagulation Inhibitor	0.00134851	45	Immunologic Factors,	No	No
Tadalafil	0.00135112	17	Enzyme Inhibitors, Phosphodiesterase Inhibitors,	No	No
Azelastine	0.00137643	16	Anti-Allergic Agents, Anti-Asthmatic Agents, Autonomic Agents, Bronchodilator Agents, Enzyme Inhibitors, Peripheral Nervous System Agents, Neurotransmitter Agents, Histamine Agents, Histamine Antagonists, Histamine H1 Antagonists, Histamine H1 Antagonists, Non-Sedating, Lipoxygenase Inhibitors, Respiratory System Agents,	No	No
Griseofulvin	0.0013913	23	Anti-Infective Agents, Antifungal Agents, Antibiotics, Antifungal,	No	No
Uric Acid	0.00141606	63	Antioxidants, Protective Agents,	Yes	No
Quercetin	0.0014199	415	Antioxidants, Protective Agents,	Yes	No
Mifepristone	0.00142389	407	Abortifacient Agents, Abortifacient Agents, Steroidal, Contraceptive Agents, Contraceptive Agents, Female, Contraceptives, Oral, Contraceptives, Oral, Synthetic, Contraceptives, Postcoital, Contraceptives, Postcoital, Synthetic, Luteolytic Agents, Hormones, Hormone Substitutes, and Hormone Antagonists, Menstruation-Inducing Agents, Hormone Antagonists, Reproductive Control Agents,	Yes	No
Amitriptyline	0.00143707	69	Adrenergic Agents, Analgesics, Analgesics, Non-Narcotic, Adrenergic Uptake Inhibitors, Antidepressive Agents, Antidepressive Agents, Tricyclic, Central Nervous System Agents, Peripheral Nervous System Agents, Neurotransmitter Agents, Neurotransmitter Uptake Inhibitors, Psychotropic Drugs, Sensory System Agents,	Yes	No
Trichothecenes	0.0014454	20	Noxae, Poisons,	No	No
Mepivacaine	0.00151913	9	Anesthetics, Anesthetics, Local, Central Nervous System Agents, Central Nervous System Depressants, Peripheral Nervous System Agents, Sensory System Agents,	No	No
Trimethadione	0.00154686	9	Anticonvulsants, Central Nervous System Agents,	No	No
4-Nitroquinoline-1-Oxide	0.00156097	67	Carcinogens, Noxae, Mutagens,	Yes	No
Ketoprofen	0.00158172	43	Analgesics, Analgesics, Non-Narcotic, Anti-Inflammatory Agents, Non-Steroidal, Anti-Inflammatory Agents, Antirheumatic Agents, Cyclooxygenase Inhibitors, Enzyme Inhibitors, Peripheral Nervous System Agents, Sensory System Agents,	Yes	No
Cyproterone Acetate	0.00165787	21	Androgen Antagonists, Antineoplastic Agents, Contraceptive Agents, Contraceptive Agents, Male, Hormone Antagonists, Hormones, Hormone Substitutes, and Hormone Antagonists, Reproductive Control Agents,	Yes	No
Diphtheria Toxin	0.0018147	183	Noxae, Poisons,	Yes	No
Sulfur Dioxide	0.0018147	12	Air Pollutants, Environmental Pollutants,	No	No
Deferoxamine	0.00182818	285	Chelating Agents, Iron Chelating Agents, Siderophores,	Yes	No
Lisuride	0.00190354	20	Anti-Dyskinesia Agents, Antiparkinson Agents, Central Nervous System Agents, Dopamine Agents, Dopamine Agonists, Neurotransmitter Agents, Serotonin Agents, Serotonin Agonists,	No	No
Pregabalin	0.00198375	21	Analgesics, Anticonvulsants, Central Nervous System Agents, Peripheral Nervous System Agents, Sensory System Agents,	No	No
Dextroamphetamine	0.00204047	17	Central Nervous System Agents, Central Nervous System Stimulants, Dopamine Agents, Dopamine Uptake Inhibitors, Neurotransmitter Agents, Neurotransmitter Uptake Inhibitors,	No	No
Aflatoxins	0.00212007	45	Noxae, Poisons,	Yes	No
Triclosan	0.00213606	14	Anti-Infective Agents, Anti-Infective Agents, Local, Antilipemic Agents, Antimetabolites, Fatty Acid Synthesis Inhibitors,	Yes	No
Rgs Proteins	0.00226335	123	Enzyme Activators, GTP Phosphohydrolase Activators,	No	No
Sulindac	0.00227149	198	Analgesics, Analgesics, Non-Narcotic, Anti-Inflammatory Agents, Non-Steroidal, Anti-Inflammatory Agents, Antineoplastic Agents, Antirheumatic Agents, Cyclooxygenase Inhibitors, Enzyme Inhibitors, Peripheral Nervous System Agents, Sensory System Agents,	Yes	No
Citalopram	0.00227883	51	Antidepressive Agents, Antidepressive Agents, Second-Generation, Central Nervous System Agents, Neurotransmitter Agents, Neurotransmitter Uptake Inhibitors, Serotonin Agents, Serotonin Uptake Inhibitors, Psychotropic Drugs,	No	No
Puromycin	0.0023827	44	Anti-Infective Agents, Antimetabolites, Antimetabolites, Antineoplastic, Antiparasitic Agents, Antineoplastic Agents, Antiprotozoal Agents, Enzyme Inhibitors, Noxae, Protein Synthesis Inhibitors, Trypanocidal Agents,	Yes	No
Leupeptins	0.00249718	494	Enzyme Inhibitors, Protease Inhibitors,	Yes	No
Allantoin	0.00253753	13	Dermatologic Agents,	No	No
Ursodeoxycholic Acid	0.00271508	27	Cholagogues and Choleretics, Gastrointestinal Agents,	No	No
Isoantibodies	0.00279177	133	Immunologic Factors,	Yes	No
Vehicle Emissions	0.00284169	77	Air Pollutants, Environmental Pollutants,	Yes	No
Misonidazole	0.00288132	13	Anti-Infective Agents, Antiparasitic Agents, Antiprotozoal Agents, Antineoplastic Agents, Radiation-Sensitizing Agents,	Yes	No
Carbenicillin	0.00295985	20	Anti-Bacterial Agents, Anti-Infective Agents,	No	No
Cyclosporins	0.00297632	96	Enzyme Inhibitors, Immunologic Factors, Immunosuppressive Agents,	Yes	No
Silymarin	0.00304055	38	Antioxidants, Protective Agents,	Yes	No
Technetium Tc 99M Pentetate	0.00304055	10	Chelating Agents, Indicators and Reagents, Radiopharmaceuticals,	Yes	No
Mercuric Chloride	0.00304055	34	Anti-Infective Agents, Anti-Infective Agents, Local, Disinfectants,	No	No
Omega-Conotoxin Gvia	0.00309655	14	Cardiovascular Agents, Calcium Channel Blockers, Membrane Transport Modulators, Noxae, Neurotoxins,	No	No
Technetium Tc 99M Sulfur Colloid	0.00321546	27	Indicators and Reagents, Radiopharmaceuticals,	Yes	No
Mibefradil	0.00321633	26	Antihypertensive Agents, Cardiovascular Agents, Calcium Channel Blockers, Membrane Transport Modulators, Vasodilator Agents,	No	No
Methenamine	0.00334897	8	Anti-Infective Agents, Anti-Infective Agents, Urinary, Renal Agents,	No	No
Muscimol	0.00342485	31	GABA Agents, GABA Agonists, Neurotransmitter Agents,	No	No
Immunoglobulin Light Chains	0.00359618	134	Immunologic Factors,	Yes	No
Nitrogen Mustard Compounds	0.0038567	26	Alkylating Agents, Antineoplastic Agents, Alkylating, Antineoplastic Agents, Noxae,	Yes	No
Felodipine	0.00393211	30	Anti-Arrhythmia Agents, Antihypertensive Agents, Cardiovascular Agents, Calcium Channel Blockers, Membrane Transport Modulators, Vasodilator Agents,	No	No
Humic Substances	0.00396285	35	Chelating Agents,	No	No
Mianserin	0.00398331	58	Adrenergic alpha-Antagonists, Adrenergic Agents, Adrenergic Antagonists, Antidepressive Agents, Antidepressive Agents, Second-Generation, Central Nervous System Agents, Histamine Agents, Histamine Antagonists, Neurotransmitter Agents, Histamine H1 Antagonists, Serotonin Agents, Serotonin Antagonists, Psychotropic Drugs,	Yes	No
Etidronic Acid	0.00410476	16	Bone Density Conservation Agents,	Yes	No
Benzphetamine	0.00418377	14	Adrenergic Agents, Adrenergic Uptake Inhibitors, Autonomic Agents, Central Nervous System Agents, Central Nervous System Stimulants, Dopamine Agents, Dopamine Uptake Inhibitors, Peripheral Nervous System Agents, Neurotransmitter Agents, Neurotransmitter Uptake Inhibitors, Sympathomimetics,	No	No
Halothane	0.00423279	55	Anesthetics, Anesthetics, General, Anesthetics, Inhalation, Central Nervous System Agents, Central Nervous System Depressants,	Yes	No
Ertapenem	0.00429961	11	Anti-Bacterial Agents, Anti-Infective Agents,	No	No
Flumazenil	0.00429961	34	Antidotes, GABA Agents, GABA Modulators, Protective Agents, Neurotransmitter Agents,	No	No
Calcium Hydroxide	0.00443305	10	Bone Cements, Resins, Synthetic,	No	No
Protein C	0.00471086	412	Anticoagulants, Cardiovascular Agents, Fibrinolytic Agents, Fibrin Modulating Agents, Hematologic Agents,	Yes	No
Dihydrotachysterol	0.00471264	8	Bone Density Conservation Agents, Micronutrients, Growth Substances, Vitamins,	No	No
Pentostatin	0.00478172	9	Antineoplastic Agents, Enzyme Inhibitors,	No	No
Psyllium	0.00480465	5	Cathartics, Gastrointestinal Agents,	No	No
Bile Acids And Salts	0.00486065	306	Gastrointestinal Agents,	Yes	No
Immunoglobulin Gm Allotypes	0.00505477	22	Immunologic Factors,	No	No
Pseudoephedrine	0.00505477	11	Anti-Asthmatic Agents, Autonomic Agents, Bronchodilator Agents, Cardiovascular Agents, Nasal Decongestants, Peripheral Nervous System Agents, Vasoconstrictor Agents, Respiratory System Agents,	No	No
Tropisetron	0.0052416	136	Antiemetics, Autonomic Agents, Central Nervous System Agents, Peripheral Nervous System Agents, Neurotransmitter Agents, Serotonin Agents, Serotonin Antagonists, Gastrointestinal Agents,	No	No
Sulfinpyrazone	0.00563602	6	Antirheumatic Agents, Gout Suppressants, Uricosuric Agents, Renal Agents,	Yes	No
P-Aminohippuric Acid	0.00572635	13	Indicators and Reagents,	No	No
Beta-Lactams	0.0058238	151	Anti-Bacterial Agents, Anti-Infective Agents,	No	No
Sotalol	0.00587017	48	Adrenergic Agents, Adrenergic Antagonists, Adrenergic beta-Antagonists, Anti-Arrhythmia Agents, Autonomic Agents, Cardiovascular Agents, Peripheral Nervous System Agents, Neurotransmitter Agents, Sympatholytics,	No	No
Gasoline	0.00589511	48	Air Pollutants, Carcinogens, Carcinogens, Environmental, Environmental Pollutants, Noxae,	No	No
Dofetilide	0.00604834	21	Anti-Arrhythmia Agents, Cardiovascular Agents, Membrane Transport Modulators, Potassium Channel Blockers,	No	No
Temazepam	0.00612023	10	Anti-Anxiety Agents, Central Nervous System Depressants, Central Nervous System Agents, GABA Agents, GABA Modulators, Hypnotics and Sedatives, Neurotransmitter Agents, Tranquilizing Agents, Psychotropic Drugs,	No	No
Nizatidine	0.00631701	7	Anti-Ulcer Agents, Gastrointestinal Agents, Histamine Agents, Histamine Antagonists, Neurotransmitter Agents, Histamine H2 Antagonists,	No	No
Emodin	0.00656375	29	Cathartics, Enzyme Inhibitors, Gastrointestinal Agents, Protein Kinase Inhibitors,	Yes	No
Acitretin	0.00663533	11	Dermatologic Agents, Keratolytic Agents,	No	No
Piperonyl Butoxide	0.00663533	32	Pesticide Synergists, Pesticides,	No	No
Betamethasone	0.0067033	59	Adrenal Cortex Hormones, Anti-Asthmatic Agents, Anti-Inflammatory Agents, Hormones, Hormones, Hormone Substitutes, and Hormone Antagonists, Glucocorticoids, Respiratory System Agents,	Yes	No
Palmitic Acid	0.0067262	117	Enzyme Inhibitors,	Yes	No
Pokeweed Mitogens	0.00676784	28	Mitogens, Mitosis Modulators,	Yes	No
Octreotide	0.00685794	387	Antineoplastic Agents, Hormonal, Antineoplastic Agents, Gastrointestinal Agents,	Yes	No
Beclomethasone	0.00703199	58	Adrenal Cortex Hormones, Anti-Asthmatic Agents, Anti-Inflammatory Agents, Hormones, Hormones, Hormone Substitutes, and Hormone Antagonists, Glucocorticoids, Respiratory System Agents,	Yes	No
Nafcillin	0.00706282	10	Anti-Infective Agents, Anti-Bacterial Agents,	No	No
Mitomycins	0.00755775	167	Antibiotics, Antineoplastic, Antineoplastic Agents,	Yes	No
Flurbiprofen	0.00799907	50	Analgesics, Analgesics, Non-Narcotic, Anti-Inflammatory Agents, Anti-Inflammatory Agents, Non-Steroidal, Antirheumatic Agents, Central Nervous System Agents, Cyclooxygenase Inhibitors, Enzyme Inhibitors, Peripheral Nervous System Agents, Sensory System Agents,	Yes	No
S-Nitrosoglutathione	0.00840659	48	Anti-Asthmatic Agents, Anti-Infective Agents, Autonomic Agents, Bronchodilator Agents, Cardiovascular Agents, Central Nervous System Agents, Protective Agents, Neuroprotective Agents, Hematologic Agents, Peripheral Nervous System Agents, Platelet Aggregation Inhibitors, Nitric Oxide Donors, Vasodilator Agents, Respiratory System Agents,	Yes	No
Technetium Tc 99M Aggregated Albumin	0.00842932	26	Indicators and Reagents, Radiopharmaceuticals,	Yes	No
Quinuclidinyl Benzilate	0.00842932	19	Cholinergic Agents, Cholinergic Antagonists, Muscarinic Antagonists, Neurotransmitter Agents,	No	No
Collodion	0.00847422	15	Explosive Agents, Surgical Fixation Devices, Tissue Adhesives,	Yes	No
Diethylhexyl Phthalate	0.00878832	42	Plasticizers,	Yes	No
Tranexamic Acid	0.0088417	17	Antifibrinolytic Agents, Coagulants, Fibrin Modulating Agents, Hematologic Agents, Hemostatics,	Yes	No
Chlorthalidone	0.00925736	9	Antihypertensive Agents, Cardiovascular Agents, Diuretics, Membrane Transport Modulators, Natriuretic Agents, Sodium Chloride Symporter Inhibitors,	No	No
Cholic Acids	0.00927977	20	Gastrointestinal Agents,	No	No
Oxaprozin	0.00967571	3	Analgesics, Analgesics, Non-Narcotic, Anti-Inflammatory Agents, Non-Steroidal, Anti-Inflammatory Agents, Antirheumatic Agents, Peripheral Nervous System Agents, Sensory System Agents,	No	No
Chlorpyrifos	0.00970282	11	Cholinergic Agents, Cholinesterase Inhibitors, Enzyme Inhibitors, Neurotransmitter Agents, Pesticides, Insecticides,	No	No
Rivastigmine	0.00974721	17	Cholinergic Agents, Central Nervous System Agents, Cholinesterase Inhibitors, Enzyme Inhibitors, Protective Agents, Neuroprotective Agents, Neurotransmitter Agents,	No	No
Propylene Glycol	0.00988854	78	Pharmaceutic Aids, Solvents, Vehicles,	No	No
Doramectin	0.0101123	6	Anthelmintics, Anti-Anxiety Agents, Anti-Infective Agents, Anticonvulsants, Antiparasitic Agents, Central Nervous System Agents, Central Nervous System Depressants, Pesticides, Insecticides, Tranquilizing Agents, Psychotropic Drugs,	No	No
Butorphanol	0.0101141	16	Analgesics, Analgesics, Opioid, Antitussive Agents, Central Nervous System Agents, Central Nervous System Depressants, Narcotic Antagonists, Narcotics, Peripheral Nervous System Agents, Respiratory System Agents, Sensory System Agents,	No	No
Succimer	0.0103869	18	Antidotes, Chelating Agents, Protective Agents,	Yes	No
Pemoline	0.0103903	7	Central Nervous System Stimulants, Central Nervous System Agents,	No	No
Aminobenzoic Acids	0.0104658	17	Micronutrients, Growth Substances, Vitamin B Complex, Vitamins,	Yes	No
Pyrethrins	0.0105406	150	Pesticides, Insecticides,	Yes	No
Prilocaine	0.0106373	7	Anesthetics, Anesthetics, Local, Central Nervous System Depressants, Central Nervous System Agents, Peripheral Nervous System Agents, Sensory System Agents,	Yes	No
Cefoxitin	0.010678	66	Anti-Bacterial Agents, Anti-Infective Agents,	No	No
Sevelamer	0.0108446	7	Chelating Agents,	No	No
Chlorine	0.0114611	38	Chemical Warfare Agents, Noxae, Poisons,	Yes	No
Desloratadine	0.0115668	7	Cholinergic Agents, Cholinergic Antagonists, Neurotransmitter Agents, Histamine Agents, Histamine Antagonists, Histamine H1 Antagonists, Histamine H1 Antagonists, Non-Sedating,	No	No
Somatostatin	0.0116771	666	Hormones, Hormone Substitutes, and Hormone Antagonists, Hormones,	Yes	No
Nonoxynol	0.0116771	7	Antispermatogenic Agents, Contraceptive Agents, Contraceptive Agents, Female, Noxae, Spermatocidal Agents, Surface-Active Agents, Reproductive Control Agents,	No	No
Dorzolamide	0.0118485	9	Antihypertensive Agents, Carbonic Anhydrase Inhibitors, Cardiovascular Agents, Enzyme Inhibitors,	No	No
Urethane	0.0122623	30	Anesthetics, Anesthetics, General, Anesthetics, Intravenous, Antineoplastic Agents, Carcinogens, Central Nervous System Depressants, Central Nervous System Agents, Noxae,	Yes	No
Yohimbine	0.0122641	33	Adrenergic Agents, Adrenergic alpha-Antagonists, Adrenergic Antagonists, Autonomic Agents, Mydriatics, Peripheral Nervous System Agents, Neurotransmitter Agents,	No	No
Oligomycins	0.0124932	31	Anti-Infective Agents, Anti-Bacterial Agents, Enzyme Inhibitors, Uncoupling Agents,	Yes	No
Diethylnitrosamine	0.0125965	81	Alkylating Agents, Noxae,	No	No
Dinitrophenols	0.0126084	36	Enzyme Inhibitors, Fungicides, Industrial, Pesticides, Uncoupling Agents,	Yes	No
Artemisinins	0.0126475	24	Anti-Infective Agents, Antimalarials, Antiparasitic Agents, Antiprotozoal Agents,	Yes	No
Digitonin	0.0126475	53	Indicators and Reagents,	No	No
Lactams	0.0126768	82	Anti-Bacterial Agents, Anti-Infective Agents,	Yes	No
Sucrose	0.0131579	185	Flavoring Agents, Food Additives, Sweetening Agents,	Yes	No
Calcium Citrate	0.0134732	5	Food Additives,	No	No
Immunoglobulin Kappa-Chains	0.0137507	130	Immunologic Factors,	Yes	No
Ketorolac	0.0139075	30	Analgesics, Analgesics, Non-Narcotic, Anti-Inflammatory Agents, Non-Steroidal, Anti-Inflammatory Agents, Antirheumatic Agents, Cyclooxygenase Inhibitors, Enzyme Inhibitors, Peripheral Nervous System Agents, Sensory System Agents,	No	No
Ribavirin	0.0139853	221	Anti-Infective Agents, Antimetabolites, Antiviral Agents, Noxae,	Yes	No
Meglumine	0.0140717	20	Contrast Media,	Yes	No
Glycyrrhizic Acid	0.0142772	29	Anti-Inflammatory Agents,	Yes	No
Hexachlorobenzene	0.014306	11	Fungicides, Industrial, Pesticides,	Yes	No
Glutaral	0.0144349	24	Anti-Infective Agents, Disinfectants, Cross-Linking Reagents, Fixatives, Indicators and Reagents,	Yes	No
Tipranavir	0.014446	11	Anti-HIV Agents, Anti-Infective Agents, Anti-Retroviral Agents, Antiviral Agents,	No	No
Phosphocreatine	0.0145049	62	Cardiotonic Agents, Cardiovascular Agents, Protective Agents,	Yes	No
Cefdinir	0.0150212	19	Anti-Bacterial Agents, Anti-Infective Agents,	No	No
Latanoprost	0.0151571	22	Antihypertensive Agents, Cardiovascular Agents,	No	No
Almotriptan	0.0152664	7	Neurotransmitter Agents, Serotonin Agonists, Serotonin Agents,	No	No
Econazole	0.0159481	27	Anti-Infective Agents, Antifungal Agents,	No	No
Ketamine	0.0163704	195	Analgesics, Anesthetics, Anesthetics, Dissociative, Anesthetics, General, Anesthetics, Intravenous, Central Nervous System Agents, Central Nervous System Depressants, Excitatory Amino Acid Agents, Excitatory Amino Acid Antagonists, Peripheral Nervous System Agents, Neurotransmitter Agents, Sensory System Agents,	Yes	No
8-Hydroxy-2-(Di-N-Propylamino)Tetralin	0.0169963	61	Neurotransmitter Agents, Serotonin Agonists, Serotonin Agents,	No	No
Catalase	0.0171192	642	Antioxidants, Protective Agents,	Yes	No
Daunorubicin	0.017252	388	Antibiotics, Antineoplastic, Antineoplastic Agents,	Yes	No
Bimatoprost	0.0173355	11	Antihypertensive Agents, Cardiovascular Agents,	No	No
Carteolol	0.0189037	6	Adrenergic Agents, Adrenergic Antagonists, Adrenergic beta-Antagonists, Anti-Arrhythmia Agents, Antihypertensive Agents, Autonomic Agents, Cardiovascular Agents, Peripheral Nervous System Agents, Neurotransmitter Agents, Sympatholytics,	No	No
Tubocurarine	0.0194237	17	Cholinergic Agents, Cholinergic Antagonists, Neuromuscular Agents, Neuromuscular Blocking Agents, Neuromuscular Nondepolarizing Agents, Peripheral Nervous System Agents, Neurotransmitter Agents, Nicotinic Antagonists,	No	No
Lenalidomide	0.0195218	16	Antineoplastic Agents,	No	No
Carbogen	0.0197602	19	Radiation-Sensitizing Agents,	No	No
Thapsigargin	0.0199822	417	Enzyme Inhibitors,	Yes	No
Alfentanil	0.0201267	25	Analgesics, Analgesics, Opioid, Anesthetics, Anesthetics, General, Anesthetics, Intravenous, Central Nervous System Agents, Central Nervous System Depressants, Peripheral Nervous System Agents, Narcotics, Sensory System Agents,	No	No
Cetylpyridinium	0.0201267	19	Anti-Infective Agents, Anti-Infective Agents, Local, Detergents, Surface-Active Agents,	No	No
Diazoxide	0.0203052	127	Antihypertensive Agents, Cardiovascular Agents, Vasodilator Agents,	No	No
Tetrazolium Salts	0.0203364	322	Indicators and Reagents,	Yes	No
Demecolcine	0.0203434	17	Antimitotic Agents, Antineoplastic Agents, Antineoplastic Agents, Phytogenic, Mitosis Modulators, Tubulin Modulators,	Yes	No
Carbocyanines	0.0209014	54	Coloring Agents,	Yes	No
2-Aminopurine	0.0209181	51	Antimetabolites, Noxae,	No	No
Antimycin A	0.0210078	49	Anti-Bacterial Agents, Anti-Infective Agents, Antifungal Agents,	Yes	No
Ethyl Methanesulfonate	0.0210684	16	Alkylating Agents, Antineoplastic Agents, Antineoplastic Agents, Alkylating, Noxae, Mutagens,	No	No
Zearalenone	0.0213149	11	Estrogens, Estrogens, Non-Steroidal, Hormones, Hormone Substitutes, and Hormone Antagonists, Hormones,	Yes	No
4-Aminobenzoic Acid	0.0214174	42	Micronutrients, Growth Substances, Vitamin B Complex, Vitamins,	Yes	No
Meropenem	0.0219278	74	Anti-Infective Agents, Anti-Bacterial Agents,	No	No
Dienestrol	0.02224	6	Estrogens, Estrogens, Non-Steroidal, Hormones, Hormones, Hormone Substitutes, and Hormone Antagonists,	No	No
Omalizumab	0.0222995	8	Anti-Allergic Agents, Anti-Asthmatic Agents, Respiratory System Agents,	No	No
Petrolatum	0.0225474	6	Dermatologic Agents, Emollients, Ointment Bases, Pharmaceutic Aids,	No	No
Endostatins	0.0229328	13	Angiogenesis Inhibitors, Angiogenesis Modulating Agents, Antineoplastic Agents, Growth Substances, Growth Inhibitors,	Yes	No
Oxycodone	0.0236686	16	Analgesics, Analgesics, Opioid, Central Nervous System Agents, Central Nervous System Depressants, Narcotics, Peripheral Nervous System Agents, Sensory System Agents,	Yes	No
Magnesium Hydroxide	0.0238913	10	Antacids,	No	No
Taurochenodeoxycholic Acid	0.0240703	23	Cholagogues and Choleretics, Detergents, Surface-Active Agents, Gastrointestinal Agents,	No	No
Interferon-Alpha	0.0245491	1196	Anti-Infective Agents, Antiviral Agents, Immunologic Factors,	Yes	No
Aluminum Chloride	0.0247545	7	Astringents, Dermatologic Agents,	No	No
Charybdotoxin	0.0247768	14	Noxae, Neurotoxins,	Yes	No
Calcifediol	0.0248947	15	Bone Density Conservation Agents, Micronutrients, Growth Substances, Vitamins,	Yes	No
Cefamandole	0.0254008	14	Anti-Bacterial Agents, Anti-Infective Agents,	No	No
Tosylphenylalanyl Chloromethyl Ketone	0.0254591	31	Alkylating Agents, Enzyme Inhibitors, Protease Inhibitors, Noxae, Protein Synthesis Inhibitors, Serine Proteinase Inhibitors,	No	No
Mebendazole	0.0259991	16	Anthelmintics, Anti-Infective Agents, Antimitotic Agents, Antinematodal Agents, Antiparasitic Agents, Mitosis Modulators, Tubulin Modulators,	No	No
Abacavir	0.0260004	32	Anti-Infective Agents, Anti-HIV Agents, Anti-Retroviral Agents, Antiviral Agents, Enzyme Inhibitors, Nucleic Acid Synthesis Inhibitors, Reverse Transcriptase Inhibitors,	No	No
Imipramine	0.0264107	144	Adrenergic Agents, Adrenergic Uptake Inhibitors, Antidepressive Agents, Antidepressive Agents, Tricyclic, Central Nervous System Agents, Neurotransmitter Agents, Neurotransmitter Uptake Inhibitors, Psychotropic Drugs,	No	No
Lithium	0.0266442	693	Antimanic Agents, Antipsychotic Agents, Central Nervous System Agents, Central Nervous System Depressants, Tranquilizing Agents, Psychotropic Drugs,	Yes	No
Pyrantel	0.0267656	5	Anthelmintics, Anti-Infective Agents, Antinematodal Agents, Antiparasitic Agents, Neuromuscular Agents, Neuromuscular Blocking Agents, Neuromuscular Depolarizing Agents, Peripheral Nervous System Agents,	No	No
Ibutilide	0.0270823	10	Anti-Arrhythmia Agents, Cardiovascular Agents,	No	No
Phytochelatins	0.0275643	43	Chelating Agents,	No	No
Sumatriptan	0.0283099	123	Cardiovascular Agents, Neurotransmitter Agents, Serotonin Agents, Serotonin Agonists, Vasoconstrictor Agents,	No	No
Tolterodine	0.0283154	19	Cholinergic Agents, Cholinergic Antagonists, Muscarinic Antagonists, Neurotransmitter Agents,	No	No
Complementarity Determining Regions	0.0286528	18	Immunologic Factors,	Yes	No
Phenylalanine Ammonia-Lyase	0.0286528	7	Antineoplastic Agents,	No	No
Saxitoxin	0.0286528	7	Noxae, Poisons,	No	No
Autoantibodies	0.0290378	1361	Immunologic Factors,	Yes	No
Hydromorphone	0.0304196	8	Analgesics, Analgesics, Opioid, Central Nervous System Agents, Central Nervous System Depressants, Narcotics, Peripheral Nervous System Agents, Sensory System Agents,	Yes	No
Dideoxynucleosides	0.0304724	26	Anti-Infective Agents, Anti-Retroviral Agents, Antimetabolites, Antiviral Agents, Enzyme Inhibitors, Noxae, Nucleic Acid Synthesis Inhibitors, Reverse Transcriptase Inhibitors,	Yes	No
Diclofenac	0.0305036	166	Analgesics, Analgesics, Non-Narcotic, Anti-Inflammatory Agents, Anti-Inflammatory Agents, Non-Steroidal, Antirheumatic Agents, Cyclooxygenase Inhibitors, Enzyme Inhibitors, Peripheral Nervous System Agents, Sensory System Agents,	Yes	No
Pentylenetetrazole	0.0306818	37	Central Nervous System Stimulants, Central Nervous System Agents, Convulsants, GABA Agents, GABA Antagonists, Neurotransmitter Agents,	No	No
Iopamidol	0.0308418	16	Contrast Media,	Yes	No
Goserelin	0.0317012	12	Antineoplastic Agents, Antineoplastic Agents, Hormonal,	Yes	Yes
Rifaximin	0.0326402	4	Anti-Infective Agents, Gastrointestinal Agents,	No	No
Bretylium	0.0332363	5	Anti-Arrhythmia Agents, Cardiovascular Agents,	No	No
Antiplasmin	0.0334721	57	Antifibrinolytic Agents, Coagulants, Enzyme Inhibitors, Fibrin Modulating Agents, Protease Inhibitors, Hematologic Agents, Hemostatics, Serine Proteinase Inhibitors,	Yes	No
Complement C2	0.0334721	7	Immunologic Factors,	No	No
Metaraminol	0.0339449	6	Adrenergic Agonists, Adrenergic alpha-Agonists, Adrenergic Agents, Autonomic Agents, Cardiovascular Agents, Peripheral Nervous System Agents, Neurotransmitter Agents, Sympathomimetics, Vasoconstrictor Agents,	No	No
Atipamezole	0.0342371	21	Adrenergic alpha-Antagonists, Adrenergic Agents, Adrenergic Antagonists, Neurotransmitter Agents,	No	No
Plasminogen Activator Inhibitor 2	0.0350762	166	Enzyme Inhibitors, Protease Inhibitors, Serine Proteinase Inhibitors,	Yes	No
Rolipram	0.0351335	19	Antidepressive Agents, Central Nervous System Agents, Enzyme Inhibitors, Phosphodiesterase Inhibitors, Psychotropic Drugs,	No	No
Vardenafil	0.0354361	31	Enzyme Inhibitors, Phosphodiesterase Inhibitors,	No	No
Phosphoric Acid	0.0362176	79	Dental Materials,	No	No
Paclitaxel	0.0367256	1600	Antimitotic Agents, Antineoplastic Agents, Phytogenic, Antineoplastic Agents, Mitosis Modulators, Tubulin Modulators,	Yes	No
Acenocoumarol	0.0367256	4	Anticoagulants, Hematologic Agents,	Yes	No
Parabens	0.0376638	20	Food Additives, Food Preservatives, Pharmaceutic Aids, Preservatives, Pharmaceutical,	Yes	No
Sodium Pertechnetate Tc 99M	0.0377292	19	Indicators and Reagents, Radiopharmaceuticals,	Yes	No
Glimepiride	0.0380511	13	Anti-Arrhythmia Agents, Cardiovascular Agents, Hypoglycemic Agents, Immunologic Factors, Immunosuppressive Agents,	No	No
Glycyrrhetinic Acid	0.0386448	31	Anti-Inflammatory Agents,	Yes	No
Nystatin	0.0388961	108	Anti-Infective Agents, Anti-Bacterial Agents, Antifungal Agents, Membrane Transport Modulators, Ionophores,	No	No
Nicardipine	0.0390051	83	Antihypertensive Agents, Cardiovascular Agents, Calcium Channel Blockers, Membrane Transport Modulators, Vasodilator Agents,	No	No
Fentanyl	0.0401257	221	Adjuvants, Anesthesia, Analgesics, Analgesics, Opioid, Anesthetics, Anesthetics, General, Anesthetics, Intravenous, Central Nervous System Agents, Central Nervous System Depressants, Narcotics, Peripheral Nervous System Agents, Sensory System Agents,	Yes	No
Gossypol	0.0418932	19	Contraceptive Agents, Contraceptive Agents, Male, Reproductive Control Agents,	Yes	No
Chitosan	0.0429858	58	Anticholesteremic Agents, Antilipemic Agents, Antimetabolites, Biocompatible Materials, Chelating Agents, Coagulants, Hematologic Agents, Hemostatics,	Yes	No
Valinomycin	0.0440063	21	Anti-Bacterial Agents, Anti-Infective Agents, Membrane Transport Modulators, Ionophores,	Yes	No
Quinupristin	0.0446496	20	Anti-Bacterial Agents, Anti-Infective Agents,	No	No
Dalfopristin	0.0459224	20	Anti-Bacterial Agents, Anti-Infective Agents,	No	No
Menotropins	0.0466011	12	Fertility Agents, Fertility Agents, Female, Reproductive Control Agents,	Yes	No
Miconazole	0.0473629	42	Anti-Infective Agents, Antifungal Agents,	No	No
Clobazam	0.0474306	5	Anticonvulsants, Central Nervous System Agents,	No	No
Wheat Germ Agglutinin-Horseradish Peroxidase Conjugate	0.0474306	14	Molecular Probes,	No	No
Doxorubicin	0.0478889	3457	Antibiotics, Antineoplastic, Antineoplastic Agents,	Yes	No
Idoxuridine	0.0483043	9	Anti-Infective Agents, Antiviral Agents, Enzyme Inhibitors, Nucleic Acid Synthesis Inhibitors,	Yes	No
Paraquat	0.0489565	50	Herbicides, Pesticides,	Yes	No
Streptavidin	0.0490631	15	Indicators and Reagents,	Yes	No
Tazarotene	0.0496745	5	Dermatologic Agents, Noxae, Keratolytic Agents, Teratogens,	No	No
Cyclin-Dependent Kinase Inhibitor Proteins	0.0505873	55	Enzyme Inhibitors, Protein Kinase Inhibitors,	No	No
Flupenthixol	0.051303	5	Antipsychotic Agents, Central Nervous System Agents, Central Nervous System Depressants, Dopamine Agents, Dopamine Antagonists, Neurotransmitter Agents, Tranquilizing Agents, Psychotropic Drugs,	No	No
Nedocromil	0.0526676	24	Anti-Allergic Agents, Anti-Asthmatic Agents, Anti-Inflammatory Agents, Respiratory System Agents,	No	No
Zeranol	0.0528494	10	Estrogens, Estrogens, Non-Steroidal, Hormones, Hormone Substitutes, and Hormone Antagonists, Hormones,	Yes	No
Thiabendazole	0.0528947	24	Anthelmintics, Anti-Infective Agents, Antiparasitic Agents,	No	No
Cefuroxime	0.0534957	51	Anti-Bacterial Agents, Anti-Infective Agents,	No	No
Azlocillin	0.0535988	12	Anti-Bacterial Agents, Anti-Infective Agents,	No	No
Vecuronium Bromide	0.0538808	20	Cholinergic Agents, Cholinergic Antagonists, Neuromuscular Agents, Neuromuscular Blocking Agents, Neuromuscular Nondepolarizing Agents, Peripheral Nervous System Agents, Neurotransmitter Agents, Nicotinic Antagonists,	No	No
Tin	0.0547659	23	Micronutrients, Growth Substances, Trace Elements,	Yes	No
Nitrazepam	0.0552978	10	Anti-Anxiety Agents, Anticonvulsants, Central Nervous System Agents, Central Nervous System Depressants, GABA Agents, GABA Modulators, Hypnotics and Sedatives, Neurotransmitter Agents, Tranquilizing Agents, Psychotropic Drugs,	No	No
Detomidine	0.055368	9	Adrenergic Agonists, Adrenergic alpha-Agonists, Adrenergic Agents, Analgesics, Central Nervous System Agents, Central Nervous System Depressants, Hypnotics and Sedatives, Peripheral Nervous System Agents, Neurotransmitter Agents, Sensory System Agents,	No	No
Gold Sodium Thiomalate	0.0554293	17	Antirheumatic Agents,	No	No
Idazoxan	0.0554293	27	Adrenergic alpha-Antagonists, Adrenergic Agents, Adrenergic Antagonists, Neurotransmitter Agents,	No	No
Azithromycin	0.0559337	80	Anti-Bacterial Agents, Anti-Infective Agents,	No	No
Atrazine	0.0560294	62	Herbicides, Pesticides,	Yes	No
Ficusin	0.0560449	26	Anthelmintics, Anti-Infective Agents, Antiparasitic Agents, Cross-Linking Reagents, Dermatologic Agents, Indicators and Reagents, Photosensitizing Agents, Radiation-Sensitizing Agents,	No	No
Complement Inactivator Proteins	0.0573252	29	Complement Inactivating Agents, Immunologic Factors, Immunosuppressive Agents,	Yes	No
Cefepime	0.0575837	39	Anti-Bacterial Agents, Anti-Infective Agents,	No	No
Alpha-Amino-3-Hydroxy-5-Methyl-4-Isoxazolepropionic Acid	0.0580797	15	Excitatory Amino Acid Agents, Excitatory Amino Acid Agonists, Neurotransmitter Agents,	No	No
Cyclin-Dependent Kinase Inhibitor P19	0.0581338	205	Enzyme Inhibitors, Protein Kinase Inhibitors,	No	No
Chenodeoxycholic Acid	0.0585589	70	Cathartics, Gastrointestinal Agents,	Yes	No
Metoclopramide	0.0587006	114	Antiemetics, Autonomic Agents, Central Nervous System Agents, Dopamine Agents, Dopamine Antagonists, Gastrointestinal Agents, Peripheral Nervous System Agents, Neurotransmitter Agents,	Yes	No
Vasotocin	0.0592934	15	Cardiovascular Agents, Oxytocics, Vasoconstrictor Agents, Reproductive Control Agents,	Yes	No
Nitazoxanide	0.0595229	6	Anti-Infective Agents, Antiparasitic Agents,	No	No
Atovaquone	0.0609835	4	Anti-Infective Agents, Antimalarials, Antiparasitic Agents, Antiprotozoal Agents, Enzyme Inhibitors,	No	No
Acetoxyacetylaminofluorene	0.0622496	25	Alkylating Agents, Noxae,	No	No
Oxymetazoline	0.0635126	31	Adrenergic Agents, Adrenergic Agonists, Adrenergic alpha-Agonists, Autonomic Agents, Cardiovascular Agents, Nasal Decongestants, Peripheral Nervous System Agents, Neurotransmitter Agents, Sympathomimetics, Vasoconstrictor Agents, Respiratory System Agents,	No	No
Gibberellins	0.0641752	7	Growth Substances, Plant Growth Regulators,	No	No
Altretamine	0.0645104	4	Alkylating Agents, Antineoplastic Agents, Antineoplastic Agents, Alkylating, Noxae,	Yes	No
Mestranol	0.0645104	6	Estrogens, Hormones, Hormone Substitutes, and Hormone Antagonists, Hormones,	Yes	No
Iofetamine	0.0651709	379	Indicators and Reagents, Radiopharmaceuticals,	No	No
Soman	0.0671204	13	Central Nervous System Stimulants, Chemical Warfare Agents, Cholinergic Agents, Central Nervous System Agents, Convulsants, Cholinesterase Inhibitors, Enzyme Inhibitors, Noxae, Neurotransmitter Agents, Poisons,	No	No
Hydroxyzine	0.0677422	11	Antipruritics, Dermatologic Agents, Histamine Agents, Histamine Antagonists, Histamine H1 Antagonists, Neurotransmitter Agents,	No	No
Complement Activating Enzymes	0.0681538	29	Immunologic Factors,	Yes	No
Cytokinins	0.0695616	23	Growth Substances, Plant Growth Regulators,	No	No
Ethylnitrosourea	0.0742384	55	Alkylating Agents, Noxae,	Yes	No
Tacrine	0.0742384	53	Autonomic Agents, Cholinergic Agents, Central Nervous System Agents, Cholinesterase Inhibitors, Enzyme Inhibitors, Parasympathomimetics, Peripheral Nervous System Agents, Neurotransmitter Agents, Nootropic Agents,	No	No
P-Dimethylaminoazobenzene	0.0745604	19	Carcinogens, Coloring Agents, Noxae,	No	No
Tromethamine	0.0746442	14	Buffers, Excipients, Pharmaceutic Aids, Vehicles,	No	No
Medroxyprogesterone 17-Acetate	0.0755693	82	Antineoplastic Agents, Hormonal, Antineoplastic Agents, Contraceptive Agents, Contraceptive Agents, Female, Contraceptive Agents, Male, Reproductive Control Agents,	Yes	No
Fondaparinux	0.0756305	7	Anticoagulants, Hematologic Agents,	No	No
Clavulanic Acid	0.0766729	64	Anti-Bacterial Agents, Anti-Infective Agents, Enzyme Inhibitors,	No	No
Stanozolol	0.0766729	11	Anabolic Agents, Androgens, Hormones, Hormone Substitutes, and Hormone Antagonists, Hormones,	No	No
Benazepril	0.0771042	12	Angiotensin-Converting Enzyme Inhibitors, Antihypertensive Agents, Cardiovascular Agents, Enzyme Inhibitors, Protease Inhibitors,	No	No
Nicotinic Acids	0.0773992	23	Micronutrients, Growth Substances, Vitamin B Complex, Vitamins,	Yes	No
Cilostazol	0.079684	28	Anti-Asthmatic Agents, Autonomic Agents, Cardiovascular Agents, Bronchodilator Agents, Central Nervous System Agents, Enzyme Inhibitors, Fibrinolytic Agents, Fibrin Modulating Agents, Protective Agents, Peripheral Nervous System Agents, Neuroprotective Agents, Hematologic Agents, Phosphodiesterase Inhibitors, Platelet Aggregation Inhibitors, Vasodilator Agents, Respiratory System Agents,	No	No
Nitrofurazone	0.079684	7	Anti-Infective Agents,	No	No
Pimozide	0.0816738	40	Anti-Dyskinesia Agents, Antipsychotic Agents, Central Nervous System Depressants, Central Nervous System Agents, Dopamine Agents, Dopamine Antagonists, Neurotransmitter Agents, Tranquilizing Agents, Psychotropic Drugs,	Yes	No
Aflatoxin B1	0.0816738	42	Noxae, Poisons,	No	No
Flunarizine	0.0844385	25	Anticonvulsants, Cardiovascular Agents, Calcium Channel Blockers, Central Nervous System Agents, Membrane Transport Modulators, Histamine Agents, Neurotransmitter Agents, Histamine Antagonists, Histamine H1 Antagonists, Vasodilator Agents,	No	No
Bevacizumab	0.0855568	64	Angiogenesis Inhibitors, Angiogenesis Modulating Agents, Antineoplastic Agents, Growth Substances, Growth Inhibitors,	No	No
Hexamethonium Compounds	0.0871169	16	Antihypertensive Agents, Autonomic Agents, Cardiovascular Agents, Ganglionic Blockers, Peripheral Nervous System Agents,	No	No
Methacholine Chloride	0.0902627	125	Autonomic Agents, Bronchoconstrictor Agents, Cholinergic Agents, Cholinergic Agonists, Miotics, Muscarinic Agonists, Parasympathomimetics, Peripheral Nervous System Agents, Neurotransmitter Agents, Respiratory System Agents,	No	No
Polymethyl Methacrylate	0.0910772	38	Antimutagenic Agents, Bone Cements, Cardiovascular Agents, Protective Agents, Vasodilator Agents, Resins, Synthetic,	Yes	No
Sodium Sulfate	0.0910786	45	Cathartics, Gastrointestinal Agents,	No	No
Hypochlorous Acid	0.0913059	19	Noxae, Oxidants,	No	No
Grepafloxacin	0.0921544	24	Anti-Bacterial Agents, Anti-Infective Agents,	No	No
Immunoglobulin Mu-Chains	0.0928456	82	Immunologic Factors,	No	No
Potassium Cyanide	0.0938347	15	Enzyme Inhibitors, Noxae, Poisons,	No	No
Maltose	0.0940372	54	Flavoring Agents, Food Additives, Sweetening Agents,	No	No
Guanabenz	0.0942243	11	Adrenergic Agonists, Adrenergic alpha-Agonists, Adrenergic Agents, Antihypertensive Agents, Cardiovascular Agents, Neurotransmitter Agents,	No	No
Congo Red	0.0942359	14	Coloring Agents,	No	No
Pirenzepine	0.0961082	146	Anti-Ulcer Agents, Cholinergic Agents, Cholinergic Antagonists, Gastrointestinal Agents, Muscarinic Antagonists, Neurotransmitter Agents,	Yes	No
Phosphatidylethanolamine Binding Protein	0.0972124	23	Enzyme Inhibitors, Protein Kinase Inhibitors,	Yes	No
Nitrogen Dioxide	0.0982321	7	Air Pollutants, Environmental Pollutants, Noxae, Oxidants, Oxidants, Photochemical,	No	No
Benzoyl Peroxide	0.0991961	21	Dermatologic Agents,	No	No
Acridine Orange	0.099728	15	Coloring Agents, Fluorescent Dyes, Noxae, Mutagens, Indicators and Reagents, Luminescent Agents,	Yes	No
Oxybutynin	0.100087	22	Autonomic Agents, Cholinergic Agents, Cholinergic Antagonists, Muscarinic Antagonists, Parasympatholytics, Peripheral Nervous System Agents, Neurotransmitter Agents,	No	No
Octoxynol	0.100449	216	Antifoaming Agents, Antispermatogenic Agents, Contraceptive Agents, Contraceptive Agents, Female, Detergents, Excipients, Noxae, Pharmaceutic Aids, Spermatocidal Agents, Surface-Active Agents, Vehicles, Reproductive Control Agents,	Yes	No
Trimethaphan	0.102723	17	Adjuvants, Anesthesia, Antihypertensive Agents, Autonomic Agents, Cardiovascular Agents, Cholinergic Agents, Central Nervous System Agents, Cholinergic Antagonists, Ganglionic Blockers, Peripheral Nervous System Agents, Neurotransmitter Agents, Nicotinic Antagonists,	No	No
Tramadol	0.102898	23	Analgesics, Analgesics, Opioid, Central Nervous System Depressants, Central Nervous System Agents, Narcotics, Peripheral Nervous System Agents, Sensory System Agents,	Yes	No
Pyridoxine	0.103928	8	Micronutrients, Growth Substances, Vitamin B Complex, Vitamins,	Yes	No
Posaconazole	0.106	7	Anti-Infective Agents, Antifungal Agents, Antibiotics, Antifungal, Antiparasitic Agents, Antiprotozoal Agents, Trypanocidal Agents,	No	No
Aurothioglucose	0.106177	17	Antirheumatic Agents,	No	No
Ergonovine	0.106177	5	Oxytocics, Reproductive Control Agents,	No	No
Oxymorphone	0.106177	6	Adjuvants, Anesthesia, Analgesics, Analgesics, Opioid, Central Nervous System Agents, Central Nervous System Depressants, Narcotics, Peripheral Nervous System Agents, Sensory System Agents,	No	No
Procarbazine	0.106607	94	Antineoplastic Agents,	Yes	No
Ethosuximide	0.106766	53	Anticonvulsants, Central Nervous System Agents,	No	No
Curcumin	0.107204	258	Analgesics, Analgesics, Non-Narcotic, Anti-Inflammatory Agents, Anti-Inflammatory Agents, Non-Steroidal, Antineoplastic Agents, Antirheumatic Agents, Coloring Agents, Enzyme Inhibitors, Peripheral Nervous System Agents, Sensory System Agents,	Yes	No
Defensins	0.107724	20	Anti-Infective Agents,	No	No
Growth Hormone-Releasing Hormone	0.111421	903	Hormones, Hormones, Hormone Substitutes, and Hormone Antagonists,	Yes	No
Piroxicam	0.113612	60	Analgesics, Analgesics, Non-Narcotic, Anti-Inflammatory Agents, Non-Steroidal, Anti-Inflammatory Agents, Antirheumatic Agents, Cyclooxygenase Inhibitors, Enzyme Inhibitors, Peripheral Nervous System Agents, Sensory System Agents,	Yes	No
Zoledronic Acid	0.113752	39	Bone Density Conservation Agents,	No	No
Pancreatic Polypeptide	0.113766	297	Gastrointestinal Agents, Hormones, Hormone Substitutes, and Hormone Antagonists, Hormones,	No	No
Peginterferon Alfa-2A	0.115237	9	Anti-Infective Agents, Antiviral Agents,	No	No
Timolol	0.116952	54	Adrenergic Agents, Adrenergic Antagonists, Adrenergic beta-Antagonists, Anti-Arrhythmia Agents, Antihypertensive Agents, Cardiovascular Agents, Neurotransmitter Agents,	No	No
Insulin Antibodies	0.119805	28	Immunologic Factors,	No	No
Nocodazole	0.120162	461	Antimitotic Agents, Antineoplastic Agents, Mitosis Modulators, Tubulin Modulators,	Yes	No
Europium	0.122248	14	Indicators and Reagents, Luminescent Agents,	No	No
Vitamin K	0.122586	157	Antifibrinolytic Agents, Coagulants, Fibrin Modulating Agents, Micronutrients, Growth Substances, Hematologic Agents, Hemostatics, Vitamins,	Yes	No
Tetanus Toxin	0.12379	13	Noxae, Neurotoxins,	No	No
Cinnarizine	0.125018	9	Cardiovascular Agents, Calcium Channel Blockers, Membrane Transport Modulators, Neurotransmitter Agents, Histamine Agents, Histamine Antagonists, Histamine H1 Antagonists,	No	No
Penicillin V	0.125282	20	Anti-Infective Agents, Anti-Bacterial Agents,	Yes	No
Metronidazole	0.12572	141	Anti-Infective Agents, Antiparasitic Agents, Antiprotozoal Agents, Radiation-Sensitizing Agents,	Yes	No
Tolazoline	0.125832	10	Adrenergic Agents, Adrenergic alpha-Antagonists, Adrenergic Antagonists, Antihypertensive Agents, Cardiovascular Agents, Neurotransmitter Agents, Vasodilator Agents,	No	No
Antigen-Antibody Complex	0.13047	656	Immunologic Factors,	Yes	No
Antilymphocyte Serum	0.130876	109	Immunologic Factors, Immunosuppressive Agents,	Yes	No
Isoflurophate	0.130973	9	Cholinergic Agents, Cholinesterase Inhibitors, Enzyme Inhibitors, Protease Inhibitors, Neurotransmitter Agents,	Yes	No
Tibolone	0.131327	15	Anabolic Agents, Androgen Antagonists, Antihypertensive Agents, Antineoplastic Agents, Antineoplastic Agents, Hormonal, Cardiovascular Agents, Estrogen Receptor Modulators, Hormones, Hormone Substitutes, and Hormone Antagonists, Hormone Antagonists, Hormones,	No	No
Molsidomine	0.132756	12	Cardiovascular Agents, Nitric Oxide Donors, Vasodilator Agents,	No	No
Sodium Glutamate	0.136604	51	Food Additives,	No	No
Hexachlorophene	0.137289	3	Anti-Infective Agents, Anti-Infective Agents, Local,	No	No
Filipin	0.138525	38	Anti-Bacterial Agents, Anti-Infective Agents, Antifungal Agents, Antibiotics, Antifungal, Antiviral Agents,	No	No
Benzoflavones	0.141973	87	Enzyme Inhibitors,	Yes	No
Bacteriocins	0.142027	33	Anti-Bacterial Agents, Anti-Infective Agents,	No	No
Shiga Toxins	0.142027	15	Enzyme Inhibitors, Protein Synthesis Inhibitors,	No	No
Atropine	0.142502	826	Adjuvants, Anesthesia, Anti-Arrhythmia Agents, Anti-Asthmatic Agents, Autonomic Agents, Cardiovascular Agents, Bronchodilator Agents, Central Nervous System Agents, Cholinergic Agents, Cholinergic Antagonists, Muscarinic Antagonists, Parasympatholytics, Mydriatics, Peripheral Nervous System Agents, Neurotransmitter Agents, Respiratory System Agents,	Yes	No
Granisetron	0.14264	93	Antiemetics, Autonomic Agents, Central Nervous System Agents, Gastrointestinal Agents, Peripheral Nervous System Agents, Neurotransmitter Agents, Serotonin Agents, Serotonin Antagonists,	Yes	No
Myeloma Proteins	0.143403	46	Immunologic Factors,	Yes	No
Guanfacine	0.144263	18	Adrenergic Agonists, Adrenergic alpha-Agonists, Adrenergic Agents, Antihypertensive Agents, Cardiovascular Agents, Neurotransmitter Agents,	No	No
Cefditoren	0.145471	19	Anti-Bacterial Agents, Anti-Infective Agents,	No	No
Phosphothreonine	0.147343	218	Indicators and Reagents,	Yes	No
Sodium Hypochlorite	0.150305	33	Anti-Infective Agents, Disinfectants, Noxae, Oxidants,	No	No
Synephrine	0.151738	10	Adrenergic Agents, Adrenergic Agonists, Adrenergic alpha-Agonists, Autonomic Agents, Cardiovascular Agents, Nasal Decongestants, Peripheral Nervous System Agents, Neurotransmitter Agents, Sympathomimetics, Vasoconstrictor Agents, Respiratory System Agents,	No	No
Ivermectin	0.154191	59	Anti-Infective Agents, Antiparasitic Agents, Pesticides, Insecticides,	No	No
Caffeine	0.15732	1191	Central Nervous System Agents, Central Nervous System Stimulants, Enzyme Inhibitors, Phosphodiesterase Inhibitors,	Yes	No
Salicylamide	0.158351	11	Analgesics, Analgesics, Non-Narcotic, Anti-Inflammatory Agents, Non-Steroidal, Anti-Inflammatory Agents, Antirheumatic Agents, Peripheral Nervous System Agents, Sensory System Agents,	No	No
Hexamethonium	0.159009	33	Antihypertensive Agents, Autonomic Agents, Cardiovascular Agents, Cholinergic Agents, Cholinergic Antagonists, Ganglionic Blockers, Peripheral Nervous System Agents, Neurotransmitter Agents, Nicotinic Antagonists,	No	No
Megestrol	0.160433	57	Antineoplastic Agents, Hormonal, Antineoplastic Agents, Contraceptive Agents, Contraceptive Agents, Female, Contraceptives, Oral, Contraceptives, Oral, Synthetic, Reproductive Control Agents,	Yes	Yes
Gallopamil	0.161058	16	Cardiovascular Agents, Calcium Channel Blockers, Membrane Transport Modulators,	No	No
Mitotane	0.162018	6	Antineoplastic Agents, Hormonal, Antineoplastic Agents,	No	No
Povidone-Iodine	0.163779	15	Anti-Infective Agents, Anti-Infective Agents, Local,	No	No
Sunitinib	0.166253	31	Angiogenesis Inhibitors, Angiogenesis Modulating Agents, Antineoplastic Agents, Growth Substances, Growth Inhibitors,	No	No
Nalidixic Acid	0.166352	62	Anti-Infective Agents, Enzyme Inhibitors, Nucleic Acid Synthesis Inhibitors,	No	No
Bisacodyl	0.169871	4	Cathartics, Gastrointestinal Agents,	No	No
Piperacillin	0.172136	80	Anti-Infective Agents, Anti-Bacterial Agents,	No	No
Deflazacort	0.17483	8	Anti-Inflammatory Agents, Immunologic Factors, Immunosuppressive Agents,	No	No
Cyproheptadine	0.176627	50	Anti-Allergic Agents, Antipruritics, Dermatologic Agents, Gastrointestinal Agents, Neurotransmitter Agents, Histamine Agents, Histamine Antagonists, Histamine H1 Antagonists, Serotonin Agents, Serotonin Antagonists,	No	No
Tetracaine	0.178259	62	Anesthetics, Anesthetics, Local, Central Nervous System Depressants, Central Nervous System Agents, Peripheral Nervous System Agents, Sensory System Agents,	No	No
Hydrotalcite	0.178642	9	Antacids,	No	No
Coagulase	0.180918	29	Coagulants, Hematologic Agents,	No	No
Emtricitabine	0.18287	18	Anti-Infective Agents, Antiviral Agents,	No	No
Zopiclone	0.184371	7	Central Nervous System Agents, Central Nervous System Depressants, Hypnotics and Sedatives,	No	No
Lopinavir	0.186832	41	Anti-Infective Agents, Anti-HIV Agents, Anti-Retroviral Agents, Antiviral Agents, Enzyme Inhibitors, Protease Inhibitors, HIV Protease Inhibitors,	No	No
Budesonide	0.188907	104	Adrenal Cortex Hormones, Anti-Asthmatic Agents, Anti-Inflammatory Agents, Autonomic Agents, Bronchodilator Agents, Peripheral Nervous System Agents, Hormones, Hormones, Hormone Substitutes, and Hormone Antagonists, Glucocorticoids, Respiratory System Agents,	No	No
Methohexital	0.189293	7	Anesthetics, Anesthetics, General, Anesthetics, Intravenous, Central Nervous System Agents, Central Nervous System Depressants,	No	No
Esmolol	0.190077	9	Adrenergic Agents, Adrenergic Antagonists, Adrenergic beta-Antagonists, Neurotransmitter Agents,	No	No
Nitroarginine	0.192093	78	Enzyme Inhibitors,	No	No
Hepatitis Antibodies	0.192108	33	Immunologic Factors,	No	No
Sodium Phosphate	0.193982	104	Cathartics, Gastrointestinal Agents,	No	No
Epirubicin	0.196426	209	Antibiotics, Antineoplastic, Antineoplastic Agents,	Yes	Yes
Pyridostigmine Bromide	0.196426	72	Cholinergic Agents, Cholinesterase Inhibitors, Enzyme Inhibitors, Neurotransmitter Agents,	No	No
Bexarotene	0.198818	10	Anticarcinogenic Agents, Antineoplastic Agents, Protective Agents,	No	No
Pectins	0.203049	32	Food Additives,	Yes	No
Toremifene	0.208337	32	Antineoplastic Agents, Antineoplastic Agents, Hormonal, Bone Density Conservation Agents, Estrogen Receptor Modulators, Hormones, Hormone Substitutes, and Hormone Antagonists, Hormone Antagonists, Selective Estrogen Receptor Modulators,	Yes	Yes
Bismuth	0.21157	20	Antacids,	Yes	No
Quinpirole	0.214771	9	Dopamine Agents, Dopamine Agonists, Neurotransmitter Agents,	No	No
Picrotoxin	0.215367	34	Antidotes, Central Nervous System Stimulants, Central Nervous System Agents, Convulsants, GABA Agents, GABA Antagonists, Protective Agents, Neurotransmitter Agents,	No	No
Phenolsulfonphthalein	0.217957	9	Coloring Agents, Indicators and Reagents,	Yes	No
Fenbendazole	0.219365	7	Anthelmintics, Anti-Infective Agents, Antinematodal Agents, Antiparasitic Agents,	No	No
Alosetron	0.226801	29	Gastrointestinal Agents, Neurotransmitter Agents, Serotonin Antagonists, Serotonin Agents,	No	No
Kinetin	0.228725	99	Growth Substances, Plant Growth Regulators,	Yes	No
Pepstatins	0.229964	10	Enzyme Inhibitors, Protease Inhibitors,	Yes	No
Muromonab-Cd3	0.236204	44	Immunologic Factors, Immunosuppressive Agents,	No	No
Ethidium	0.236418	52	Anti-Infective Agents, Antiparasitic Agents, Antiprotozoal Agents, Cholinergic Agents, Cholinergic Antagonists, Coloring Agents, Enzyme Inhibitors, Fluorescent Dyes, Indicators and Reagents, Neurotransmitter Agents, Luminescent Agents, Nicotinic Antagonists, Trypanocidal Agents,	Yes	No
Rocuronium	0.239498	16	Neuromuscular Agents, Neuromuscular Blocking Agents, Neuromuscular Nondepolarizing Agents, Peripheral Nervous System Agents,	No	No
Aroclors	0.240452	21	Environmental Pollutants,	Yes	No
Ribosome Inactivating Proteins	0.241754	55	Enzyme Inhibitors, Protein Synthesis Inhibitors,	No	No
Cefodizime	0.243214	8	Anti-Bacterial Agents, Anti-Infective Agents,	No	No
Paraproteins	0.248317	7	Immunologic Factors,	No	No
Oxazolidinones	0.250783	8	Anti-Infective Agents, Enzyme Inhibitors, Protein Synthesis Inhibitors,	No	No
Fenclonine	0.250883	20	Enzyme Inhibitors, Neurotransmitter Agents, Serotonin Agents, Serotonin Antagonists,	No	No
Phenylpropanolamine	0.25715	27	Adrenergic Agents, Adrenergic Agonists, Adrenergic alpha-Agonists, Anti-Obesity Agents, Autonomic Agents, Appetite Depressants, Cardiovascular Agents, Central Nervous System Agents, Nasal Decongestants, Peripheral Nervous System Agents, Neurotransmitter Agents, Sympathomimetics, Vasoconstrictor Agents, Respiratory System Agents,	No	No
Hydroxycholecalciferols	0.25938	7	Bone Density Conservation Agents, Micronutrients, Growth Substances, Vitamins,	Yes	No
Raclopride	0.260554	10	Antipsychotic Agents, Central Nervous System Depressants, Central Nervous System Agents, Dopamine Agents, Dopamine Antagonists, Neurotransmitter Agents, Tranquilizing Agents, Psychotropic Drugs,	No	No
Spiperone	0.264534	14	Antipsychotic Agents, Central Nervous System Depressants, Central Nervous System Agents, Dopamine Agents, Dopamine Antagonists, Neurotransmitter Agents, Tranquilizing Agents, Psychotropic Drugs,	No	No
Proadifen	0.268124	7	Enzyme Inhibitors,	No	No
Mustard Gas	0.274567	59	Chemical Warfare Agents, Dermatologic Agents, Noxae, Poisons,	No	No
Mivacurium	0.27654	19	Neuromuscular Agents, Neuromuscular Blocking Agents, Neuromuscular Nondepolarizing Agents, Peripheral Nervous System Agents,	No	No
Dermatan Sulfate	0.282132	13	Anticoagulants, Hematologic Agents,	Yes	No
Clofarabine	0.284238	6	Antineoplastic Agents,	No	No
Sufentanil	0.28699	29	Adjuvants, Anesthesia, Analgesics, Analgesics, Opioid, Anesthetics, Anesthetics, General, Anesthetics, Intravenous, Central Nervous System Depressants, Central Nervous System Agents, Narcotics, Peripheral Nervous System Agents, Sensory System Agents,	No	No
Nitrous Oxide	0.289411	77	Analgesics, Analgesics, Non-Narcotic, Anesthetics, Anesthetics, General, Anesthetics, Inhalation, Central Nervous System Agents, Central Nervous System Depressants, Peripheral Nervous System Agents, Sensory System Agents,	Yes	No
Ritonavir	0.295489	105	Anti-HIV Agents, Anti-Infective Agents, Anti-Retroviral Agents, Antiviral Agents, Enzyme Inhibitors, Protease Inhibitors, HIV Protease Inhibitors,	No	No
Milbemycin Oxime	0.297895	3	Anthelmintics, Anti-Infective Agents, Antiparasitic Agents,	No	No
Phenothrin	0.297895	3	Pesticides, Insecticides,	No	No
Ceftazidime	0.299796	110	Anti-Bacterial Agents, Anti-Infective Agents,	No	No
Amiodarone	0.300813	91	Anti-Arrhythmia Agents, Cardiovascular Agents, Enzyme Inhibitors, Vasodilator Agents,	Yes	No
Orciprenaline	0.301055	4	Adrenergic Agents, Adrenergic Agonists, Adrenergic beta-Agonists, Anti-Asthmatic Agents, Autonomic Agents, Bronchodilator Agents, Peripheral Nervous System Agents, Neurotransmitter Agents, Sympathomimetics, Tocolytic Agents, Reproductive Control Agents, Respiratory System Agents,	No	No
Cyclin-Dependent Kinase Inhibitor P18	0.302559	372	Enzyme Inhibitors, Protein Kinase Inhibitors,	Yes	No
Melanocyte-Stimulating Hormones	0.306281	14	Hormones, Hormone Substitutes, and Hormone Antagonists, Hormones,	Yes	No
Ruthenium Red	0.312018	23	Coloring Agents, Indicators and Reagents,	Yes	No
Acetohexamide	0.315146	3	Hypoglycemic Agents,	No	No
Barium Sulfate	0.317662	34	Contrast Media,	Yes	No
Complement C1Q	0.317671	78	Immunologic Factors,	Yes	No
Agar	0.322702	59	Culture Media,	Yes	No
Medetomidine	0.32951	23	Adrenergic Agonists, Adrenergic alpha-Agonists, Adrenergic Agents, Analgesics, Analgesics, Non-Narcotic, Central Nervous System Agents, Central Nervous System Depressants, Hypnotics and Sedatives, Peripheral Nervous System Agents, Neurotransmitter Agents, Sensory System Agents,	No	No
Malathion	0.33036	44	Cholinergic Agents, Cholinesterase Inhibitors, Enzyme Inhibitors, Neurotransmitter Agents, Pesticides, Insecticides,	No	No
Sulfanilamide	0.331813	9	Anti-Bacterial Agents, Anti-Infective Agents,	No	No
Cefpirome	0.333248	20	Anti-Bacterial Agents, Anti-Infective Agents,	No	No
Spironolactone	0.338749	114	Aldosterone Antagonists, Diuretics, Hormones, Hormone Substitutes, and Hormone Antagonists, Natriuretic Agents, Hormone Antagonists,	Yes	No
Quinagolide	0.344058	4	Dopamine Agents, Dopamine Agonists, Neurotransmitter Agents,	No	No
Darunavir	0.352034	4	Anti-Infective Agents, Anti-HIV Agents, Anti-Retroviral Agents, Antiviral Agents, Enzyme Inhibitors, Protease Inhibitors, HIV Protease Inhibitors,	No	No
Alpha-Defensins	0.352573	11	Anti-Infective Agents,	No	No
Benzocaine	0.360461	6	Anesthetics, Anesthetics, Local, Central Nervous System Agents, Central Nervous System Depressants, Peripheral Nervous System Agents, Sensory System Agents,	No	No
Ceftibuten	0.360941	5	Anti-Bacterial Agents, Anti-Infective Agents,	No	No
Prochlorperazine	0.366054	5	Antiemetics, Autonomic Agents, Antipsychotic Agents, Central Nervous System Depressants, Central Nervous System Agents, Dopamine Agents, Dopamine Antagonists, Gastrointestinal Agents, Peripheral Nervous System Agents, Neurotransmitter Agents, Tranquilizing Agents, Psychotropic Drugs,	No	No
Sorafenib	0.367042	59	Antineoplastic Agents, Enzyme Inhibitors, Protein Kinase Inhibitors,	No	No
Protamines	0.367877	41	Coagulants, Hematologic Agents, Heparin Antagonists,	Yes	No
Chloromercuribenzoates	0.36884	7	Enzyme Inhibitors, Indicators and Reagents, Sulfhydryl Reagents,	No	No
Complement C3B	0.368969	98	Immunologic Factors,	No	No
Amoxicillin	0.370067	228	Anti-Bacterial Agents, Anti-Infective Agents,	Yes	No
Neuronal Apoptosis-Inhibitory Protein	0.37428	145	Enzyme Inhibitors,	No	No
Leukotriene Antagonists	0.375043	15	Anti-Asthmatic Agents, Respiratory System Agents,	No	No
Midodrine	0.375043	4	Adrenergic Agonists, Adrenergic alpha-Agonists, Adrenergic Agents, Autonomic Agents, Cardiovascular Agents, Peripheral Nervous System Agents, Neurotransmitter Agents, Sympathomimetics, Vasoconstrictor Agents,	No	No
Lentinan	0.375283	28	Adjuvants, Immunologic, Antineoplastic Agents, Immunologic Factors,	Yes	No
Travoprost	0.376455	7	Antihypertensive Agents, Cardiovascular Agents,	No	No
Hirudins	0.37701	13	Cardiovascular Agents, Enzyme Inhibitors, Fibrinolytic Agents, Fibrin Modulating Agents, Protease Inhibitors, Hematologic Agents,	Yes	No
Dansyl Compounds	0.378169	13	Indicators and Reagents,	Yes	No
Labetalol	0.378274	19	Adrenergic alpha-Antagonists, Adrenergic Agents, Adrenergic Antagonists, Adrenergic beta-Antagonists, Antihypertensive Agents, Autonomic Agents, Cardiovascular Agents, Peripheral Nervous System Agents, Neurotransmitter Agents, Sympatholytics,	No	No
Nitrendipine	0.378274	8	Antihypertensive Agents, Cardiovascular Agents, Calcium Channel Blockers, Membrane Transport Modulators, Vasodilator Agents,	No	No
Cefotetan	0.3826	8	Anti-Bacterial Agents, Anti-Infective Agents,	No	No
Paraldehyde	0.391029	4	Anticonvulsants, Central Nervous System Depressants, Central Nervous System Agents, Hypnotics and Sedatives,	No	No
Donepezil	0.392815	28	Central Nervous System Agents, Cholinergic Agents, Cholinesterase Inhibitors, Enzyme Inhibitors, Neurotransmitter Agents, Nootropic Agents,	No	No
Tosyllysine Chloromethyl Ketone	0.393293	9	Alkylating Agents, Enzyme Inhibitors, Protease Inhibitors, Noxae, Protein Synthesis Inhibitors, Serine Proteinase Inhibitors,	No	No
Dextropropoxyphene	0.396053	8	Analgesics, Analgesics, Opioid, Central Nervous System Agents, Central Nervous System Depressants, Narcotics, Peripheral Nervous System Agents, Sensory System Agents,	Yes	No
Norgestimate	0.396747	5	Contraceptive Agents, Contraceptive Agents, Female, Contraceptives, Oral, Contraceptives, Oral, Synthetic, Reproductive Control Agents,	No	No
Permethrin	0.397177	80	Enzyme Inhibitors, Pesticides, Insecticides,	No	No
Procetofen	0.399058	9	Antilipemic Agents, Antimetabolites,	No	No
Diethylstilbestrol	0.40032	319	Antineoplastic Agents, Antineoplastic Agents, Hormonal, Carcinogens, Estrogens, Estrogens, Non-Steroidal, Noxae, Hormones, Hormones, Hormone Substitutes, and Hormone Antagonists,	Yes	No
Pancuronium	0.405834	41	Cholinergic Agents, Cholinergic Antagonists, Neuromuscular Agents, Neuromuscular Blocking Agents, Neuromuscular Nondepolarizing Agents, Peripheral Nervous System Agents, Neurotransmitter Agents, Nicotinic Antagonists,	No	No
Clonazepam	0.409688	60	Anticonvulsants, Central Nervous System Agents, GABA Agents, GABA Modulators, Neurotransmitter Agents,	No	No
Complement Factor B	0.413309	20	Immunologic Factors,	No	No
Deoxyglucose	0.41408	507	Anti-Infective Agents, Antimetabolites, Antiviral Agents, Noxae,	Yes	No
Levorphanol	0.418664	8	Analgesics, Analgesics, Opioid, Central Nervous System Agents, Central Nervous System Depressants, Narcotics, Peripheral Nervous System Agents, Sensory System Agents,	No	No
Tissue Plasminogen Activator	0.421127	488	Cardiovascular Agents, Fibrinolytic Agents, Fibrin Modulating Agents, Hematologic Agents,	Yes	No
Clarithromycin	0.422134	205	Anti-Bacterial Agents, Anti-Infective Agents, Enzyme Inhibitors, Protein Synthesis Inhibitors,	No	No
Gamma-Aminobutyric Acid	0.433099	613	GABA Agents, Neurotransmitter Agents,	Yes	No
Papaverine	0.436598	69	Cardiovascular Agents, Enzyme Inhibitors, Phosphodiesterase Inhibitors, Vasodilator Agents,	No	No
Dibutyl Phthalate	0.441261	20	Plasticizers,	Yes	No
Ranolazine	0.444688	6	Enzyme Inhibitors,	No	No
Adefovir	0.447077	13	Anti-Infective Agents, Anti-Retroviral Agents, Antiviral Agents, Enzyme Inhibitors, Nucleic Acid Synthesis Inhibitors, Reverse Transcriptase Inhibitors,	No	No
Benzalkonium Compounds	0.448289	38	Anti-Infective Agents, Anti-Infective Agents, Local, Detergents, Pharmaceutic Aids, Preservatives, Pharmaceutical, Surface-Active Agents,	No	No
Cefmetazole	0.45477	7	Anti-Bacterial Agents, Anti-Infective Agents,	No	No
Vitamin K 3	0.45543	30	Antifibrinolytic Agents, Coagulants, Fibrin Modulating Agents, Micronutrients, Growth Substances, Hematologic Agents, Hemostatics, Vitamins,	Yes	No
Beta-Naphthoflavone	0.456315	87	Enzyme Inhibitors,	Yes	No
(4-(M-Chlorophenylcarbamoyloxy)-2-Butynyl)Trimethylammonium Chloride	0.45791	7	Autonomic Agents, Cholinergic Agents, Cholinergic Agonists, Ganglionic Stimulants, Muscarinic Agonists, Peripheral Nervous System Agents, Neurotransmitter Agents, Nicotinic Agonists,	No	No
Immunotoxins	0.458273	157	Immunologic Factors,	Yes	No
Thienamycins	0.458273	44	Anti-Bacterial Agents, Anti-Infective Agents,	No	No
Zonisamide	0.458273	28	Anticonvulsants, Antioxidants, Central Nervous System Agents, Protective Agents,	No	No
Vanadium	0.4615	20	Micronutrients, Growth Substances, Trace Elements,	No	No
Copper Sulfate	0.461794	21	Antidotes, Autonomic Agents, Central Nervous System Agents, Emetics, Gastrointestinal Agents, Protective Agents, Peripheral Nervous System Agents,	No	No
Proflavine	0.463626	7	Anti-Infective Agents, Anti-Infective Agents, Local,	No	No
Saccharin	0.463626	7	Flavoring Agents, Food Additives, Sweetening Agents,	No	No
Vinyl Chloride	0.463626	16	Carcinogens, Noxae,	No	No
Cyclin-Dependent Kinase Inhibitor P15	0.466982	936	Enzyme Inhibitors, Protein Kinase Inhibitors,	Yes	No
Trilostane	0.471007	13	Abortifacient Agents, Abortifacient Agents, Steroidal, Antineoplastic Agents, Enzyme Inhibitors, Reproductive Control Agents,	No	No
Alefacept	0.471739	10	Dermatologic Agents,	No	No
Darifenacin	0.472617	22	Cholinergic Agents, Cholinergic Antagonists, Muscarinic Antagonists, Neurotransmitter Agents,	No	No
Bicuculline	0.481432	103	Central Nervous System Agents, Central Nervous System Stimulants, Convulsants, GABA Agents, GABA Antagonists, Neurotransmitter Agents,	No	No
Carprofen	0.483742	4	Analgesics, Analgesics, Non-Narcotic, Anti-Inflammatory Agents, Anti-Inflammatory Agents, Non-Steroidal, Antirheumatic Agents, Dermatologic Agents, Peripheral Nervous System Agents, Photosensitizing Agents, Radiation-Sensitizing Agents, Sensory System Agents,	No	No
Pargyline	0.486147	20	Antihypertensive Agents, Cardiovascular Agents, Enzyme Inhibitors, Monoamine Oxidase Inhibitors,	Yes	No
Lanreotide	0.487928	56	Antineoplastic Agents,	No	No
Emetine	0.488255	7	Amebicides, Anthelmintics, Anti-Infective Agents, Antinematodal Agents, Antiparasitic Agents, Antiprotozoal Agents, Autonomic Agents, Cathartics, Central Nervous System Agents, Emetics, Enzyme Inhibitors, Gastrointestinal Agents, Protein Synthesis Inhibitors, Peripheral Nervous System Agents,	Yes	No
Misoprostol	0.492405	47	Abortifacient Agents, Abortifacient Agents, Nonsteroidal, Anti-Ulcer Agents, Gastrointestinal Agents, Oxytocics, Reproductive Control Agents,	No	No
Ubiquinone	0.495926	84	Micronutrients, Growth Substances,	Yes	No
Cloprostenol	0.497592	35	Contraceptive Agents, Contraceptive Agents, Female, Luteolytic Agents, Reproductive Control Agents,	No	No
Ozone	0.502237	127	Air Pollutants, Environmental Pollutants, Noxae, Oxidants, Oxidants, Photochemical,	Yes	No
Oxandrolone	0.503374	14	Anabolic Agents, Androgens, Hormones, Hormone Substitutes, and Hormone Antagonists, Hormones,	No	No
Coformycin	0.504158	13	Antibiotics, Antineoplastic, Antineoplastic Agents, Enzyme Inhibitors, Immunologic Factors, Immunosuppressive Agents,	No	No
Maprotiline	0.508964	15	Adrenergic Agents, Adrenergic Uptake Inhibitors, Antidepressive Agents, Antidepressive Agents, Second-Generation, Central Nervous System Agents, Neurotransmitter Agents, Neurotransmitter Uptake Inhibitors, Psychotropic Drugs,	No	No
Complement Factor H	0.510547	21	Complement Inactivating Agents, Immunologic Factors, Immunosuppressive Agents,	No	No
Monensin	0.513949	33	Anti-Infective Agents, Antifungal Agents, Antiparasitic Agents, Antiprotozoal Agents, Coccidiostats, Membrane Transport Modulators, Ionophores,	Yes	No
Amdinocillin	0.515953	23	Anti-Bacterial Agents, Anti-Infective Agents, Anti-Infective Agents, Urinary, Renal Agents,	No	No
Ergotamine	0.518166	22	Adrenergic Agonists, Adrenergic alpha-Agonists, Adrenergic Agents, Analgesics, Analgesics, Non-Narcotic, Cardiovascular Agents, Central Nervous System Agents, Peripheral Nervous System Agents, Neurotransmitter Agents, Vasoconstrictor Agents, Sensory System Agents,	No	No
Sodium Azide	0.522273	17	Cardiovascular Agents, Enzyme Inhibitors, Noxae, Mutagens, Indicators and Reagents, Vasodilator Agents,	Yes	No
Dicyclomine	0.523474	5	Autonomic Agents, Cholinergic Agents, Cholinergic Antagonists, Muscarinic Antagonists, Parasympatholytics, Peripheral Nervous System Agents, Neurotransmitter Agents,	No	No
Dipyrone	0.525152	22	Analgesics, Analgesics, Non-Narcotic, Anti-Inflammatory Agents, Anti-Inflammatory Agents, Non-Steroidal, Antirheumatic Agents, Peripheral Nervous System Agents, Sensory System Agents,	No	No
Loteprednol Etabonate	0.533788	4	Anti-Allergic Agents,	No	No
Glipizide	0.534762	12	Hypoglycemic Agents,	No	No
Thiourea	0.540393	42	Indicators and Reagents,	Yes	No
Xylazine	0.540393	9	Adrenergic Agents, Adrenergic Agonists, Adrenergic alpha-Agonists, Neurotransmitter Agents,	No	No
Anidulafungin	0.540681	7	Anti-Infective Agents, Antifungal Agents, Antibiotics, Antifungal,	No	No
Clobetasol	0.544355	8	Adrenal Cortex Hormones, Anti-Inflammatory Agents, Hormones, Hormones, Hormone Substitutes, and Hormone Antagonists, Glucocorticoids,	Yes	No
Nafenopin	0.545748	8	Antilipemic Agents, Antimetabolites, Carcinogens, Noxae, Peroxisome Proliferators,	No	No
Sulfamerazine	0.545748	5	Anti-Infective Agents,	No	No
Ceftriaxone	0.552546	97	Anti-Bacterial Agents, Anti-Infective Agents,	No	No
Flavin Mononucleotide	0.552735	30	Micronutrients, Growth Substances, Vitamin B Complex, Vitamins,	No	No
Nigericin	0.56155	15	Anti-Infective Agents, Anti-Bacterial Agents, Membrane Transport Modulators, Ionophores,	Yes	No
Moxonidine	0.566812	13	Antihypertensive Agents, Cardiovascular Agents,	No	No
Iodoacetamide	0.576983	15	Alkylating Agents, Enzyme Inhibitors, Noxae,	No	No
Aluminum Sulfate	0.578972	9	Adjuvants, Immunologic, Immunologic Factors,	No	No
Cefazolin	0.579019	36	Anti-Bacterial Agents, Anti-Infective Agents,	No	No
Cephaloridine	0.579675	9	Anti-Bacterial Agents, Anti-Infective Agents,	No	No
Diphenoxylate	0.580929	3	Analgesics, Analgesics, Opioid, Antidiarrheals, Central Nervous System Agents, Central Nervous System Depressants, Gastrointestinal Agents, Peripheral Nervous System Agents, Sensory System Agents,	No	No
Ritanserin	0.58215	16	Anti-Anxiety Agents, Antidepressive Agents, Antidepressive Agents, Second-Generation, Antipsychotic Agents, Central Nervous System Depressants, Central Nervous System Agents, Neurotransmitter Agents, Serotonin Agents, Serotonin Antagonists, Tranquilizing Agents, Psychotropic Drugs,	No	No
Disintegrins	0.586266	39	Hematologic Agents, Platelet Aggregation Inhibitors,	Yes	No
Methanol	0.586941	74	Solvents,	Yes	No
Cephradine	0.586941	6	Anti-Bacterial Agents, Anti-Infective Agents,	No	No
Flecainide	0.587348	35	Anti-Arrhythmia Agents, Cardiovascular Agents,	No	No
Aceclofenac	0.587469	5	Analgesics, Analgesics, Non-Narcotic, Anti-Inflammatory Agents, Anti-Inflammatory Agents, Non-Steroidal, Antirheumatic Agents, Peripheral Nervous System Agents, Sensory System Agents,	No	No
Aluminum Hydroxide	0.587469	51	Adjuvants, Immunologic, Antacids, Immunologic Factors,	No	No
Aequorin	0.588567	20	Indicators and Reagents, Luminescent Agents,	No	No
Loxapine	0.589607	3	Antipsychotic Agents, Central Nervous System Agents, Central Nervous System Depressants, Dopamine Agents, Dopamine Antagonists, Neurotransmitter Agents, Tranquilizing Agents, Psychotropic Drugs,	No	No
Serotonin	0.598814	1582	Neurotransmitter Agents, Serotonin Agents,	Yes	No
Phenylbutazone	0.598814	20	Analgesics, Analgesics, Non-Narcotic, Anti-Inflammatory Agents, Non-Steroidal, Anti-Inflammatory Agents, Antirheumatic Agents, Peripheral Nervous System Agents, Sensory System Agents,	No	No
Oseltamivir	0.605472	4	Anti-Infective Agents, Antiviral Agents, Enzyme Inhibitors,	No	No
Nabumetone	0.611239	11	Analgesics, Analgesics, Non-Narcotic, Anti-Inflammatory Agents, Non-Steroidal, Anti-Inflammatory Agents, Antirheumatic Agents, Peripheral Nervous System Agents, Sensory System Agents,	No	No
Cefaclor	0.613699	26	Anti-Bacterial Agents, Anti-Infective Agents,	No	No
Hepatitis C Antibodies	0.613699	71	Immunologic Factors,	No	No
Formazans	0.615413	7	Indicators and Reagents,	Yes	No
Ioversol	0.615413	3	Contrast Media,	No	No
Atazanavir	0.61563	17	Anti-Infective Agents, Anti-HIV Agents, Anti-Retroviral Agents, Antiviral Agents, Enzyme Inhibitors, Protease Inhibitors, HIV Protease Inhibitors,	No	No
Microcystins	0.617009	14	Carcinogens, Noxae,	Yes	No
Pirbuterol	0.619138	4	Adrenergic Agents, Adrenergic Agonists, Adrenergic beta-Agonists, Anti-Asthmatic Agents, Autonomic Agents, Cardiotonic Agents, Bronchodilator Agents, Cardiovascular Agents, Protective Agents, Peripheral Nervous System Agents, Neurotransmitter Agents, Respiratory System Agents,	No	No
Streptonigrin	0.623932	12	Antibiotics, Antineoplastic, Antineoplastic Agents,	No	No
Leflunomide	0.63217	74	Antirheumatic Agents, Enzyme Inhibitors, Immunologic Factors, Immunosuppressive Agents,	No	No
Opioid Peptides	0.637615	63	Neurotransmitter Agents,	No	No
Nitroblue Tetrazolium	0.638869	12	Indicators and Reagents,	Yes	No
Sulfathiazole	0.638869	5	Anti-Infective Agents,	No	No
Immunoglobulin Joining Region	0.647407	63	Immunologic Factors,	Yes	No
Immunoglobulin Allotypes	0.652483	85	Immunologic Factors,	No	No
Iodoacetates	0.652639	13	Alkylating Agents, Enzyme Inhibitors, Noxae,	Yes	No
Aztreonam	0.658406	53	Anti-Bacterial Agents, Anti-Infective Agents,	No	No
Atracurium	0.662401	42	Cholinergic Agents, Cholinergic Antagonists, Peripheral Nervous System Agents, Neuromuscular Agents, Neuromuscular Blocking Agents, Neuromuscular Nondepolarizing Agents, Neurotransmitter Agents, Nicotinic Antagonists,	No	No
Iron-Dextran Complex	0.664114	9	Hematinics, Hematologic Agents,	No	No
Levobunolol	0.664114	3	Adrenergic Agents, Adrenergic Antagonists, Adrenergic beta-Antagonists, Autonomic Agents, Peripheral Nervous System Agents, Neurotransmitter Agents, Sympatholytics,	No	No
Lithium Compounds	0.665635	15	Antidepressive Agents, Antimanic Agents, Central Nervous System Agents, Central Nervous System Depressants, Tranquilizing Agents, Psychotropic Drugs,	Yes	No
Protein S	0.678828	93	Anticoagulants, Hematologic Agents,	Yes	No
Etomidate	0.687448	36	Anesthetics, Anesthetics, General, Anesthetics, Intravenous, Central Nervous System Agents, Central Nervous System Depressants, Hypnotics and Sedatives,	No	No
Glycopyrrolate	0.687448	8	Adjuvants, Anesthesia, Central Nervous System Agents, Cholinergic Agents, Cholinergic Antagonists, Muscarinic Antagonists, Neurotransmitter Agents,	No	No
Colistin	0.695694	19	Anti-Bacterial Agents, Anti-Infective Agents,	No	No
Rhodamines	0.696949	127	Coloring Agents, Fluorescent Dyes, Luminescent Agents, Indicators and Reagents,	Yes	No
Cerulenin	0.696949	12	Anti-Infective Agents, Antifungal Agents, Antibiotics, Antifungal, Antilipemic Agents, Antimetabolites, Fatty Acid Synthesis Inhibitors,	Yes	No
Alamethicin	0.696949	9	Anti-Bacterial Agents, Anti-Infective Agents, Enzyme Inhibitors, Membrane Transport Modulators, Ionophores, Uncoupling Agents,	No	No
Asbestos	0.698301	36	Carcinogens, Noxae,	Yes	No
Guanethidine	0.699075	65	Adrenergic Agents, Antihypertensive Agents, Autonomic Agents, Cardiovascular Agents, Peripheral Nervous System Agents, Neurotransmitter Agents, Sympatholytics,	No	No
Oxymetholone	0.699084	7	Anabolic Agents, Androgens, Hormones, Hormone Substitutes, and Hormone Antagonists, Hormones,	Yes	No
Doxacurium	0.699084	4	Neuromuscular Agents, Neuromuscular Blocking Agents, Neuromuscular Nondepolarizing Agents, Peripheral Nervous System Agents,	No	No
Propafenone	0.705114	26	Anti-Arrhythmia Agents, Cardiovascular Agents,	No	No
Polysorbates	0.707267	7	Excipients, Pharmaceutic Aids, Surface-Active Agents, Vehicles,	No	No
Etretinate	0.709064	10	Dermatologic Agents, Keratolytic Agents,	No	No
Unithiol	0.718371	8	Antidotes, Chelating Agents, Protective Agents,	No	No
Vancomycin	0.720865	219	Anti-Bacterial Agents, Anti-Infective Agents,	Yes	No
Formycins	0.720865	7	Antibiotics, Antineoplastic, Antineoplastic Agents,	No	No
Tiron	0.724322	10	Indicators and Reagents,	No	No
Gentian Violet	0.727739	7	Anti-Infective Agents, Anti-Infective Agents, Local,	Yes	No
Denileukin Diftitox	0.733151	5	Antineoplastic Agents,	No	No
Trimeprazine	0.734632	8	Antipruritics, Dermatologic Agents,	No	No
Fosfomycin	0.738616	28	Anti-Bacterial Agents, Anti-Infective Agents,	No	No
Auranofin	0.740421	29	Antirheumatic Agents,	No	No
Ketanserin	0.741132	81	Antihypertensive Agents, Cardiovascular Agents, Hematologic Agents, Neurotransmitter Agents, Platelet Aggregation Inhibitors, Serotonin Agents, Serotonin Antagonists,	No	No
Technetium Tc 99M Exametazime	0.746236	100	Indicators and Reagents, Radiopharmaceuticals,	Yes	No
Diamide	0.746236	10	Indicators and Reagents, Sulfhydryl Reagents, Radiation-Sensitizing Agents,	No	No
Ellipticines	0.754475	15	Antineoplastic Agents, Antineoplastic Agents, Phytogenic, Immunologic Factors, Immunosuppressive Agents,	Yes	No
Anisomycin	0.759618	243	Anti-Bacterial Agents, Anti-Infective Agents, Antiparasitic Agents, Antiprotozoal Agents, Enzyme Inhibitors, Nucleic Acid Synthesis Inhibitors, Protein Synthesis Inhibitors,	Yes	No
Fura-2	0.763814	157	Chelating Agents, Coloring Agents, Fluorescent Dyes, Luminescent Agents, Indicators and Reagents,	Yes	No
Arsenic Trioxide	0.764455	290	Antineoplastic Agents,	No	No
Nitric Acid	0.767353	8	Explosive Agents,	No	No
Rimantadine	0.777807	5	Anti-Infective Agents, Antiviral Agents, Enzyme Inhibitors, Nucleic Acid Synthesis Inhibitors,	No	No
Nalbuphine	0.778015	4	Analgesics, Analgesics, Opioid, Central Nervous System Agents, Central Nervous System Depressants, Narcotic Antagonists, Narcotics, Peripheral Nervous System Agents, Sensory System Agents,	No	No
Ondansetron	0.77895	174	Anti-Anxiety Agents, Antiemetics, Autonomic Agents, Antipruritics, Antipsychotic Agents, Central Nervous System Agents, Central Nervous System Depressants, Dermatologic Agents, Gastrointestinal Agents, Peripheral Nervous System Agents, Neurotransmitter Agents, Serotonin Agents, Serotonin Antagonists, Tranquilizing Agents, Psychotropic Drugs,	Yes	No
Idarubicin	0.780048	70	Antibiotics, Antineoplastic, Antineoplastic Agents,	Yes	No
Amprenavir	0.781611	34	Anti-Bacterial Agents, Anti-Infective Agents, Anti-HIV Agents, Antibiotics, Antitubercular, Anti-Retroviral Agents, Antitubercular Agents, Antiviral Agents, Enzyme Inhibitors, HIV Protease Inhibitors, Protease Inhibitors,	No	No
4-Aminopyridine	0.782072	134	Cardiovascular Agents, Membrane Transport Modulators, Potassium Channel Blockers,	No	No
Mezlocillin	0.782401	11	Anti-Infective Agents, Anti-Bacterial Agents,	No	No
Virginiamycin	0.78923	29	Anti-Bacterial Agents, Anti-Infective Agents, Enzyme Inhibitors, Protein Synthesis Inhibitors,	No	No
Bisbenzimide	0.791994	15	Anthelmintics, Anti-Infective Agents, Antinematodal Agents, Antiparasitic Agents, Coloring Agents, Filaricides, Fluorescent Dyes, Indicators and Reagents, Luminescent Agents,	Yes	No
Trimipramine	0.791994	3	Adrenergic Agents, Adrenergic Uptake Inhibitors, Antidepressive Agents, Antidepressive Agents, Tricyclic, Central Nervous System Agents, Neurotransmitter Agents, Neurotransmitter Uptake Inhibitors, Psychotropic Drugs,	No	No
Carbonyl Cyanide M-Chlorophenyl Hydrazone	0.793258	50	Enzyme Inhibitors, Membrane Transport Modulators, Ionophores, Uncoupling Agents,	Yes	No
Cotinine	0.799217	29	Indicators and Reagents,	No	No
Tinidazole	0.799217	29	Alkylating Agents, Anti-Infective Agents, Antiparasitic Agents, Antiprotozoal Agents, Antitrichomonal Agents, Noxae,	No	No
Paromomycin	0.803867	17	Amebicides, Anti-Infective Agents, Anti-Bacterial Agents, Antiparasitic Agents, Antiprotozoal Agents,	No	No
Aphidicolin	0.807147	208	Anti-Infective Agents, Antiviral Agents, Enzyme Inhibitors,	Yes	No
Iproniazid	0.811942	6	Antidepressive Agents, Central Nervous System Agents, Enzyme Inhibitors, Monoamine Oxidase Inhibitors, Psychotropic Drugs,	No	No
Flunisolide	0.813193	8	Anti-Asthmatic Agents, Anti-Inflammatory Agents, Respiratory System Agents,	No	No
Phalloidine	0.813296	71	Noxae, Poisons,	No	No
Hetastarch	0.819757	21	Blood Substitutes, Hematologic Agents, Plasma Substitutes,	No	No
Tetrodotoxin	0.822957	214	Anesthetics, Anesthetics, Local, Cardiovascular Agents, Central Nervous System Depressants, Central Nervous System Agents, Membrane Transport Modulators, Noxae, Peripheral Nervous System Agents, Poisons, Sodium Channel Blockers, Sensory System Agents,	Yes	No
Cisatracurium	0.824756	5	Neuromuscular Agents, Peripheral Nervous System Agents, Neuromuscular Blocking Agents,	No	No
Hydrogen Sulfide	0.825548	14	Air Pollutants, Environmental Pollutants,	No	No
Tenoxicam	0.829782	4	Analgesics, Analgesics, Non-Narcotic, Anti-Inflammatory Agents, Anti-Inflammatory Agents, Non-Steroidal, Antirheumatic Agents, Cyclooxygenase Inhibitors, Enzyme Inhibitors, Peripheral Nervous System Agents, Sensory System Agents,	No	No
Vigabatrin	0.831995	25	Anticonvulsants, Central Nervous System Agents, Enzyme Inhibitors, GABA Agents, Neurotransmitter Agents,	No	No
Fibrin Tissue Adhesive	0.835946	11	Coagulants, Hemostatics, Hematologic Agents, Surgical Fixation Devices, Tissue Adhesives,	Yes	No
Modafinil	0.835946	3	Central Nervous System Agents, Central Nervous System Stimulants, Protective Agents, Neuroprotective Agents,	No	No
Diltiazem	0.83879	180	Antihypertensive Agents, Cardiovascular Agents, Calcium Channel Blockers, Membrane Transport Modulators, Vasodilator Agents,	Yes	No
3-Iodobenzylguanidine	0.840025	18	Antineoplastic Agents, Enzyme Inhibitors, Indicators and Reagents, Radiopharmaceuticals,	Yes	No
Nadolol	0.848897	26	Adrenergic Agents, Adrenergic Antagonists, Adrenergic beta-Antagonists, Anti-Arrhythmia Agents, Antihypertensive Agents, Autonomic Agents, Cardiovascular Agents, Peripheral Nervous System Agents, Neurotransmitter Agents, Sympatholytics,	No	No
Diphenyl	0.856566	376	Fungicides, Industrial, Pesticides,	No	No
Triethylenetetramine	0.85891	9	Chelating Agents,	No	No
Aroclor 1254	0.86208	16	Antithyroid Agents, Hormone Antagonists, Hormones, Hormone Substitutes, and Hormone Antagonists,	No	No
Piretanide	0.86208	4	Diuretics, Natriuretic Agents,	No	No
Eplerenone	0.862732	30	Aldosterone Antagonists, Hormone Antagonists, Hormones, Hormone Substitutes, and Hormone Antagonists,	No	No
Teicoplanin	0.862732	24	Anti-Bacterial Agents, Anti-Infective Agents,	No	No
Toluene	0.865785	44	Solvents,	Yes	No
Ceftizoxime	0.875494	17	Anti-Bacterial Agents, Anti-Infective Agents,	No	No
Temocillin	0.877335	5	Anti-Bacterial Agents, Anti-Infective Agents,	No	No
Bepridil	0.881893	28	Anti-Arrhythmia Agents, Antihypertensive Agents, Cardiovascular Agents, Calcium Channel Blockers, Membrane Transport Modulators, Vasodilator Agents,	No	No
Carbaryl	0.882385	15	Cholinergic Agents, Cholinesterase Inhibitors, Enzyme Inhibitors, Neurotransmitter Agents, Pesticides, Insecticides,	No	No
Fexofenadine	0.885556	15	Anti-Allergic Agents, Histamine Agents, Neurotransmitter Agents, Histamine Antagonists, Histamine H1 Antagonists, Histamine H1 Antagonists, Non-Sedating,	No	No
Immunoglobulin Isotypes	0.896106	123	Immunologic Factors,	Yes	No
Thiopental	0.914175	81	Anesthetics, Anesthetics, General, Anesthetics, Intravenous, Anticonvulsants, Central Nervous System Depressants, Central Nervous System Agents, GABA Agents, GABA Modulators, Hypnotics and Sedatives, Neurotransmitter Agents,	No	No
Distamycins	0.91503	23	Anti-Bacterial Agents, Anti-Infective Agents, Enzyme Inhibitors, Nucleic Acid Synthesis Inhibitors,	Yes	No
Methotrimeprazine	0.915626	3	Analgesics, Analgesics, Non-Narcotic, Antipsychotic Agents, Central Nervous System Agents, Central Nervous System Depressants, Dopamine Agents, Dopamine Antagonists, Peripheral Nervous System Agents, Neurotransmitter Agents, Tranquilizing Agents, Psychotropic Drugs, Sensory System Agents,	No	No
5-Hydroxytryptophan	0.921662	33	Antidepressive Agents, Antidepressive Agents, Second-Generation, Central Nervous System Agents, Psychotropic Drugs,	No	No
Trichloroethylene	0.922617	12	Anesthetics, Anesthetics, General, Anesthetics, Inhalation, Central Nervous System Depressants, Central Nervous System Agents, Solvents,	No	No
Flucytosine	0.933795	21	Anti-Infective Agents, Antifungal Agents, Antimetabolites, Noxae,	Yes	No
Dexmedetomidine	0.938257	26	Adrenergic Agonists, Adrenergic alpha-Agonists, Adrenergic Agents, Analgesics, Analgesics, Non-Narcotic, Central Nervous System Agents, Central Nervous System Depressants, Hypnotics and Sedatives, Peripheral Nervous System Agents, Neurotransmitter Agents, Sensory System Agents,	No	No
Ricin	0.944295	107	Chemical Warfare Agents, Noxae, Poisons,	Yes	No
Dichlororibofuranosylbenzimidazole	0.948905	10	Enzyme Inhibitors, Nucleic Acid Synthesis Inhibitors,	Yes	No
Cefpodoxime	0.952375	16	Anti-Bacterial Agents, Anti-Infective Agents,	No	No
Dicloxacillin	0.954044	4	Anti-Bacterial Agents, Anti-Infective Agents,	No	No
Mandelic Acids	0.955243	7	Anti-Infective Agents, Anti-Infective Agents, Urinary, Renal Agents,	No	No
Nilutamide	0.958123	8	Androgen Antagonists, Antineoplastic Agents, Hormones, Hormone Substitutes, and Hormone Antagonists, Hormone Antagonists,	No	No
Lidocaine	0.963382	200	Anesthetics, Anesthetics, Local, Anti-Arrhythmia Agents, Cardiovascular Agents, Central Nervous System Agents, Central Nervous System Depressants, Peripheral Nervous System Agents, Sensory System Agents,	Yes	No
Povidone	0.965311	33	Blood Substitutes, Hematologic Agents, Pharmaceutic Aids, Plasma Substitutes,	Yes	No
Carbonyl Cyanide P-Trifluoromethoxyphenylhydrazone	0.967776	39	Enzyme Inhibitors, Membrane Transport Modulators, Ionophores, Uncoupling Agents,	No	No
Pipecuronium	0.971446	3	Cholinergic Agents, Cholinergic Antagonists, Neuromuscular Agents, Neuromuscular Blocking Agents, Neuromuscular Nondepolarizing Agents, Peripheral Nervous System Agents, Neurotransmitter Agents, Nicotinic Antagonists,	No	No
Potassium Phosphate	0.971446	43	Buffers, Cariostatic Agents, Protective Agents,	No	No
Methyltestosterone	0.973432	18	Anabolic Agents, Antineoplastic Agents, Hormonal, Antineoplastic Agents, Hormones, Hormone Substitutes, and Hormone Antagonists, Hormones,	Yes	No
Phorbol Esters	0.980759	358	Carcinogens, Noxae,	Yes	No
Zolpidem	0.99301	14	Central Nervous System Agents, Central Nervous System Depressants, GABA Agents, GABA Agonists, Hypnotics and Sedatives, Neurotransmitter Agents,	No	No
Mupirocin	0.993549	17	Anti-Infective Agents, Anti-Bacterial Agents, Enzyme Inhibitors, Protein Synthesis Inhibitors,	No	No
Cephalexin	0.994563	33	Anti-Bacterial Agents, Anti-Infective Agents,	No	No

## Sheet: Pancreas
Drug	FDR	DF	Pharmacological Action	Found In GS	Found In DrugBank
3-Iodobenzylguanidine	<1.00E-16	6	Antineoplastic Agents, Enzyme Inhibitors, Indicators and Reagents, Radiopharmaceuticals,	Yes	No
Acetylcholine	<1.00E-16	548	Cardiovascular Agents, Cholinergic Agents, Neurotransmitter Agents, Vasodilator Agents,	Yes	No
Acetylcysteine	<1.00E-16	526	Anti-Infective Agents, Antioxidants, Antiviral Agents, Free Radical Scavengers, Expectorants, Respiratory System Agents,	Yes	No
Adenosine	<1.00E-16	1522	Analgesics, Anti-Arrhythmia Agents, Cardiovascular Agents, Central Nervous System Agents, Peripheral Nervous System Agents, Vasodilator Agents, Sensory System Agents,	Yes	No
Angiotensin Ii	<1.00E-16	412	Cardiovascular Agents, Vasoconstrictor Agents,	Yes	No
Benzoates	<1.00E-16	9	Anti-Infective Agents, Antifungal Agents,	Yes	No
Biotin	<1.00E-16	901	Micronutrients, Growth Substances, Vitamin B Complex, Vitamins,	Yes	No
Bisbenzimide	<1.00E-16	12	Anthelmintics, Anti-Infective Agents, Antinematodal Agents, Antiparasitic Agents, Coloring Agents, Filaricides, Fluorescent Dyes, Indicators and Reagents, Luminescent Agents,	Yes	No
Bismuth	<1.00E-16	6	Antacids,	Yes	No
Bleomycin	<1.00E-16	1139	Antibiotics, Antineoplastic, Antineoplastic Agents,	Yes	No
Buserelin	<1.00E-16	11	Fertility Agents, Fertility Agents, Female, Reproductive Control Agents,	Yes	No
Camptothecin	<1.00E-16	1025	Antineoplastic Agents, Antineoplastic Agents, Phytogenic, Enzyme Inhibitors,	Yes	No
Carotenoids	<1.00E-16	8	Antioxidants, Protective Agents,	Yes	No
Choline	<1.00E-16	266	Antilipemic Agents, Antimetabolites, Central Nervous System Agents, Gastrointestinal Agents, Lipotropic Agents, Nootropic Agents,	Yes	No
Ciprofloxacin	<1.00E-16	507	Anti-Infective Agents, Enzyme Inhibitors, Nucleic Acid Synthesis Inhibitors,	Yes	No
Copper	<1.00E-16	976	Micronutrients, Growth Substances, Trace Elements,	Yes	No
Cyclin-Dependent Kinase Inhibitor P21	<1.00E-16	6195	Enzyme Inhibitors, Protein Kinase Inhibitors,	Yes	No
Cyclin-Dependent Kinase Inhibitor P27	<1.00E-16	5181	Enzyme Inhibitors, Protein Kinase Inhibitors,	Yes	No
Dacarbazine	<1.00E-16	137	Alkylating Agents, Antineoplastic Agents, Antineoplastic Agents, Alkylating, Noxae,	Yes	No
Dexamethasone	<1.00E-16	1606	Adrenal Cortex Hormones, Anti-Inflammatory Agents, Antiemetics, Antineoplastic Agents, Antineoplastic Agents, Hormonal, Autonomic Agents, Central Nervous System Agents, Gastrointestinal Agents, Peripheral Nervous System Agents, Hormones, Hormones, Hormone Substitutes, and Hormone Antagonists, Glucocorticoids,	Yes	No
Dextrans	<1.00E-16	131	Anticoagulants, Blood Substitutes, Hematologic Agents, Plasma Substitutes,	Yes	No
Dopamine	<1.00E-16	864	Autonomic Agents, Cardiotonic Agents, Cardiovascular Agents, Dopamine Agents, Protective Agents, Peripheral Nervous System Agents, Neurotransmitter Agents, Sympathomimetics,	Yes	No
Estradiol	<1.00E-16	3167	Estrogens, Hormones, Hormones, Hormone Substitutes, and Hormone Antagonists,	Yes	No
Follicle Stimulating Hormone	<1.00E-16	294	Hormones, Hormones, Hormone Substitutes, and Hormone Antagonists,	Yes	No
Glucagon	<1.00E-16	276	Gastrointestinal Agents, Hormones, Hormones, Hormone Substitutes, and Hormone Antagonists,	Yes	No
Glucagon-Like Peptide 1	<1.00E-16	9	Incretins, Hormones, Hormones, Hormone Substitutes, and Hormone Antagonists,	Yes	No
Goserelin	<1.00E-16	4	Antineoplastic Agents, Antineoplastic Agents, Hormonal,	Yes	No
Heparin	<1.00E-16	733	Anticoagulants, Cardiovascular Agents, Fibrinolytic Agents, Fibrin Modulating Agents, Hematologic Agents,	Yes	No
Histamine	<1.00E-16	250	Histamine Agents, Neurotransmitter Agents, Histamine Agonists,	Yes	No
Iopamidol	<1.00E-16	2	Contrast Media,	Yes	No
Iron	<1.00E-16	1183	Micronutrients, Growth Substances, Trace Elements,	Yes	No
Isoproterenol	<1.00E-16	222	Adrenergic Agonists, Adrenergic Agents, Adrenergic beta-Agonists, Anti-Asthmatic Agents, Autonomic Agents, Cardiotonic Agents, Cardiovascular Agents, Bronchodilator Agents, Protective Agents, Peripheral Nervous System Agents, Neurotransmitter Agents, Sympathomimetics, Respiratory System Agents,	Yes	No
Marine Toxins	<1.00E-16	6	Noxae, Poisons,	Yes	No
Meperidine	<1.00E-16	4	Adjuvants, Anesthesia, Analgesics, Analgesics, Opioid, Central Nervous System Agents, Central Nervous System Depressants, Narcotics, Peripheral Nervous System Agents, Sensory System Agents,	Yes	No
Methotrexate	<1.00E-16	355	Abortifacient Agents, Abortifacient Agents, Nonsteroidal, Antimetabolites, Antimetabolites, Antineoplastic, Antineoplastic Agents, Antirheumatic Agents, Dermatologic Agents, Enzyme Inhibitors, Folic Acid Antagonists, Noxae, Nucleic Acid Synthesis Inhibitors, Immunologic Factors, Immunosuppressive Agents, Reproductive Control Agents,	Yes	No
Mitomycin	<1.00E-16	992	Alkylating Agents, Antibiotics, Antineoplastic, Antineoplastic Agents, Cross-Linking Reagents, Enzyme Inhibitors, Noxae, Nucleic Acid Synthesis Inhibitors, Indicators and Reagents,	Yes	No
Molsidomine	<1.00E-16	6	Cardiovascular Agents, Nitric Oxide Donors, Vasodilator Agents,	Yes	No
Morphine	<1.00E-16	177	Analgesics, Analgesics, Opioid, Central Nervous System Agents, Central Nervous System Depressants, Narcotics, Peripheral Nervous System Agents, Sensory System Agents,	Yes	No
Neostigmine	<1.00E-16	3	Autonomic Agents, Cholinergic Agents, Cholinesterase Inhibitors, Enzyme Inhibitors, Parasympathomimetics, Peripheral Nervous System Agents, Neurotransmitter Agents,	Yes	No
Nicotinic Acids	<1.00E-16	6	Micronutrients, Growth Substances, Vitamin B Complex, Vitamins,	Yes	No
Nitric Oxide	<1.00E-16	2067	Anti-Asthmatic Agents, Antioxidants, Autonomic Agents, Cardiovascular Agents, Bronchodilator Agents, Endothelium-Dependent Relaxing Factors, Free Radical Scavengers, Peripheral Nervous System Agents, Neurotransmitter Agents, Vasodilator Agents, Respiratory System Agents,	Yes	No
Nogalamycin	<1.00E-16	6	Antibiotics, Antineoplastic, Antineoplastic Agents, Enzyme Inhibitors, Nucleic Acid Synthesis Inhibitors, Indicators and Reagents, Intercalating Agents,	Yes	No
Norepinephrine	<1.00E-16	423	Adrenergic Agonists, Adrenergic alpha-Agonists, Adrenergic Agents, Autonomic Agents, Cardiovascular Agents, Peripheral Nervous System Agents, Neurotransmitter Agents, Sympathomimetics, Vasoconstrictor Agents,	Yes	No
Peroxides	<1.00E-16	180	Noxae, Oxidants,	Yes	No
Plasminogen Activator Inhibitor 2	<1.00E-16	8	Enzyme Inhibitors, Protease Inhibitors, Serine Proteinase Inhibitors,	Yes	No
Progesterone	<1.00E-16	3334	Hormones, Hormone Substitutes, and Hormone Antagonists, Hormones, Progestins,	Yes	No
S-Nitroso-N-Acetylpenicillamine	<1.00E-16	6	Cardiovascular Agents, Enzyme Inhibitors, Nitric Oxide Donors, Vasodilator Agents,	Yes	No
Selenium	<1.00E-16	232	Antioxidants, Micronutrients, Protective Agents, Growth Substances, Trace Elements,	Yes	No
Sorbitol	<1.00E-16	108	Cathartics, Flavoring Agents, Food Additives, Gastrointestinal Agents, Indicators and Reagents, Sweetening Agents,	Yes	No
Staurosporine	<1.00E-16	955	Enzyme Inhibitors,	Yes	No
Superoxide Dismutase	<1.00E-16	1855	Antioxidants, Free Radical Scavengers,	Yes	No
Tamoxifen	<1.00E-16	1157	Antineoplastic Agents, Hormonal, Antineoplastic Agents, Bone Density Conservation Agents, Estrogen Antagonists, Estrogen Receptor Modulators, Hormones, Hormone Substitutes, and Hormone Antagonists, Hormone Antagonists, Selective Estrogen Receptor Modulators,	Yes	No
Teriparatide	<1.00E-16	2	Bone Density Conservation Agents,	Yes	No
Triamcinolone	<1.00E-16	80	Adrenal Cortex Hormones, Anti-Inflammatory Agents, Hormones, Hormone Substitutes, and Hormone Antagonists, Hormones, Glucocorticoids,	Yes	No
Triptorelin	<1.00E-16	9	Antineoplastic Agents, Antineoplastic Agents, Hormonal, Contraceptive Agents, Contraceptive Agents, Female, Luteolytic Agents, Reproductive Control Agents,	Yes	No
Tryptophan	<1.00E-16	440	Antidepressive Agents, Antidepressive Agents, Second-Generation, Central Nervous System Agents, Psychotropic Drugs,	Yes	No
Vinblastine	<1.00E-16	318	Antimitotic Agents, Antineoplastic Agents, Antineoplastic Agents, Phytogenic, Mitosis Modulators, Tubulin Modulators,	Yes	No
Vitamin A	<1.00E-16	1328	Micronutrients, Growth Substances, Vitamins,	Yes	No
Vitamin D	<1.00E-16	1326	Bone Density Conservation Agents, Micronutrients, Growth Substances, Vitamins,	Yes	No
Zinc	<1.00E-16	3076	Micronutrients, Growth Substances, Trace Elements,	Yes	No
Opium	<1.00E-16	5	Analgesics, Analgesics, Opioid, Antidiarrheals, Antitussive Agents, Central Nervous System Agents, Central Nervous System Depressants, Gastrointestinal Agents, Narcotics, Peripheral Nervous System Agents, Respiratory System Agents, Sensory System Agents,	No	No
Copper Sulfate	<1.00E-16	4	Antidotes, Autonomic Agents, Central Nervous System Agents, Emetics, Gastrointestinal Agents, Protective Agents, Peripheral Nervous System Agents,	No	No
Acarbose	<1.00E-16	3	Enzyme Inhibitors, Hypoglycemic Agents,	No	No
Interferon Beta-1B	<1.00E-16	3	Adjuvants, Immunologic, Immunologic Factors,	No	No
Furazolidone	<1.00E-16	4	Anti-Infective Agents, Anti-Infective Agents, Local, Anti-Infective Agents, Urinary, Antiparasitic Agents, Antiprotozoal Agents, Antitrichomonal Agents, Enzyme Inhibitors, Monoamine Oxidase Inhibitors, Renal Agents,	No	No
Methazolamide	<1.00E-16	2	Carbonic Anhydrase Inhibitors, Diuretics, Enzyme Inhibitors, Natriuretic Agents,	No	No
Temozolomide	<1.00E-16	155	Alkylating Agents, Antineoplastic Agents, Alkylating, Antineoplastic Agents, Noxae,	No	No
Dapsone	<1.00E-16	4	Anti-Bacterial Agents, Anti-Infective Agents, Antimalarials, Antiparasitic Agents, Antiprotozoal Agents, Enzyme Inhibitors, Folic Acid Antagonists, Leprostatic Agents,	No	No
Troleandomycin	<1.00E-16	2	Anti-Bacterial Agents, Anti-Infective Agents,	No	No
Ammonium Molybdate	<1.00E-16	3	Coloring Agents,	No	No
Doramectin	<1.00E-16	2	Anthelmintics, Anti-Anxiety Agents, Anti-Infective Agents, Anticonvulsants, Antiparasitic Agents, Central Nervous System Agents, Central Nervous System Depressants, Pesticides, Insecticides, Tranquilizing Agents, Psychotropic Drugs,	No	No
Bupropion	<1.00E-16	3	Antidepressive Agents, Antidepressive Agents, Second-Generation, Central Nervous System Agents, Dopamine Agents, Dopamine Uptake Inhibitors, Neurotransmitter Agents, Neurotransmitter Uptake Inhibitors, Psychotropic Drugs,	No	No
Losartan	<1.00E-16	74	Angiotensin II Type 1 Receptor Blockers, Anti-Arrhythmia Agents, Antihypertensive Agents, Cardiovascular Agents,	No	No
Immunoglobulin Constant Regions	<1.00E-16	9	Immunologic Factors,	No	No
Pyrimethamine	<1.00E-16	6	Anti-Infective Agents, Antimalarials, Antiparasitic Agents, Antiprotozoal Agents, Enzyme Inhibitors, Folic Acid Antagonists,	No	No
Isocarboxazid	<1.00E-16	2	Antidepressive Agents, Central Nervous System Agents, Enzyme Inhibitors, Monoamine Oxidase Inhibitors, Psychotropic Drugs,	No	No
Bexarotene	<1.00E-16	4	Anticarcinogenic Agents, Antineoplastic Agents, Protective Agents,	No	No
Lomefloxacin	<1.00E-16	5	Anti-Infective Agents,	No	No
Granisetron	<1.00E-16	2	Antiemetics, Autonomic Agents, Central Nervous System Agents, Gastrointestinal Agents, Peripheral Nervous System Agents, Neurotransmitter Agents, Serotonin Agents, Serotonin Antagonists,	No	No
Tiotropium	<1.00E-16	2	Anti-Asthmatic Agents, Autonomic Agents, Bronchodilator Agents, Cholinergic Agents, Cholinergic Antagonists, Parasympatholytics, Peripheral Nervous System Agents, Neurotransmitter Agents, Respiratory System Agents,	No	No
Cefadroxil	<1.00E-16	2	Anti-Bacterial Agents, Anti-Infective Agents,	No	No
Mephobarbital	<1.00E-16	2	Anticonvulsants, Central Nervous System Agents, Central Nervous System Depressants, GABA Agents, GABA Modulators, Hypnotics and Sedatives, Neurotransmitter Agents,	No	No
Tizanidine	<1.00E-16	2	Adrenergic Agents, Adrenergic Agonists, Adrenergic alpha-Agonists, Analgesics, Anticonvulsants, Autonomic Agents, Central Nervous System Agents, Muscle Relaxants, Central, Parasympatholytics, Neuromuscular Agents, Peripheral Nervous System Agents, Neurotransmitter Agents, Sensory System Agents,	No	No
Charcoal	<1.00E-16	462	Antidotes, Protective Agents,	No	No
Hydroquinone	<1.00E-16	146	Antioxidants, Noxae, Protective Agents, Mutagens, Radiation-Protective Agents,	No	No
Inositol	<1.00E-16	623	Micronutrients, Growth Substances, Vitamin B Complex, Vitamins,	No	No
2-Amino-5-Phosphonovalerate	<1.00E-16	6	Excitatory Amino Acid Agents, Excitatory Amino Acid Antagonists, Neurotransmitter Agents,	No	No
Pimozide	<1.00E-16	4	Anti-Dyskinesia Agents, Antipsychotic Agents, Central Nervous System Depressants, Central Nervous System Agents, Dopamine Agents, Dopamine Antagonists, Neurotransmitter Agents, Tranquilizing Agents, Psychotropic Drugs,	No	No
Atracurium	<1.00E-16	6	Cholinergic Agents, Cholinergic Antagonists, Peripheral Nervous System Agents, Neuromuscular Agents, Neuromuscular Blocking Agents, Neuromuscular Nondepolarizing Agents, Neurotransmitter Agents, Nicotinic Antagonists,	No	No
Disintegrins	<1.00E-16	9	Hematologic Agents, Platelet Aggregation Inhibitors,	No	No
Fluvoxamine	<1.00E-16	5	Anti-Anxiety Agents, Antidepressive Agents, Antidepressive Agents, Second-Generation, Central Nervous System Agents, Central Nervous System Depressants, Neurotransmitter Agents, Neurotransmitter Uptake Inhibitors, Serotonin Agents, Serotonin Uptake Inhibitors, Tranquilizing Agents, Psychotropic Drugs,	No	No
Hydrotalcite	<1.00E-16	2	Antacids,	No	No
Secobarbital	<1.00E-16	6	Adjuvants, Anesthesia, Central Nervous System Depressants, Central Nervous System Agents, GABA Agents, GABA Modulators, Hypnotics and Sedatives, Neurotransmitter Agents,	No	No
Imiquimod	<1.00E-16	6	Adjuvants, Immunologic, Antineoplastic Agents, Immunologic Factors, Interferon Inducers,	No	No
Dalteparin	<1.00E-16	2	Anticoagulants, Cardiovascular Agents, Fibrinolytic Agents, Fibrin Modulating Agents, Hematologic Agents,	No	No
Fondaparinux	<1.00E-16	2	Anticoagulants, Hematologic Agents,	No	No
Procainamide	<1.00E-16	11	Anti-Arrhythmia Agents, Cardiovascular Agents,	No	No
Benzocaine	<1.00E-16	2	Anesthetics, Anesthetics, Local, Central Nervous System Agents, Central Nervous System Depressants, Peripheral Nervous System Agents, Sensory System Agents,	No	No
Dihydroergotamine	<1.00E-16	2	Analgesics, Analgesics, Non-Narcotic, Cardiovascular Agents, Central Nervous System Agents, Dopamine Agents, Dopamine Agonists, Peripheral Nervous System Agents, Neurotransmitter Agents, Vasoconstrictor Agents, Sensory System Agents,	No	No
Edrophonium	<1.00E-16	2	Antidotes, Cholinergic Agents, Cholinesterase Inhibitors, Enzyme Inhibitors, Protective Agents, Neurotransmitter Agents,	No	No
Olopatadine	<1.00E-16	2	Analgesics, Analgesics, Non-Narcotic, Anti-Allergic Agents, Anti-Inflammatory Agents, Non-Steroidal, Anti-Inflammatory Agents, Antirheumatic Agents, Peripheral Nervous System Agents, Histamine Agents, Histamine Antagonists, Neurotransmitter Agents, Histamine H1 Antagonists, Histamine H1 Antagonists, Non-Sedating, Sensory System Agents,	No	No
Nadolol	<1.00E-16	2	Adrenergic Agents, Adrenergic Antagonists, Adrenergic beta-Antagonists, Anti-Arrhythmia Agents, Antihypertensive Agents, Autonomic Agents, Cardiovascular Agents, Peripheral Nervous System Agents, Neurotransmitter Agents, Sympatholytics,	No	No
Potassium Phosphate	<1.00E-16	7	Buffers, Cariostatic Agents, Protective Agents,	No	No
Ciclopirox	<1.00E-16	3	Anti-Infective Agents, Antifungal Agents,	No	No
Lenalidomide	<1.00E-16	6	Antineoplastic Agents,	No	No
Tadalafil	<1.00E-16	3	Enzyme Inhibitors, Phosphodiesterase Inhibitors,	No	No
Montelukast	<1.00E-16	2	Anti-Asthmatic Agents, Hormones, Hormone Substitutes, and Hormone Antagonists, Hormone Antagonists, Leukotriene Antagonists, Respiratory System Agents,	No	No
Fosinopril	<1.00E-16	2	Angiotensin-Converting Enzyme Inhibitors, Antihypertensive Agents, Cardiovascular Agents, Enzyme Inhibitors, Protease Inhibitors,	No	No
Fenoprofen	<1.00E-16	2	Analgesics, Analgesics, Non-Narcotic, Anti-Inflammatory Agents, Anti-Inflammatory Agents, Non-Steroidal, Antirheumatic Agents, Cyclooxygenase Inhibitors, Enzyme Inhibitors, Peripheral Nervous System Agents, Sensory System Agents,	No	No
Fluphenazine	<1.00E-16	6	Antipsychotic Agents, Central Nervous System Agents, Central Nervous System Depressants, Dopamine Agents, Dopamine Antagonists, Neurotransmitter Agents, Tranquilizing Agents, Psychotropic Drugs,	No	No
Propafenone	<1.00E-16	7	Anti-Arrhythmia Agents, Cardiovascular Agents,	No	No
Pindolol	<1.00E-16	5	Adrenergic Agents, Adrenergic Antagonists, Adrenergic beta-Antagonists, Antihypertensive Agents, Cardiovascular Agents, Neurotransmitter Agents, Serotonin Agents, Serotonin Antagonists, Vasodilator Agents,	No	No
Freund's Adjuvant	<1.00E-16	8	Adjuvants, Immunologic, Immunologic Factors,	No	No
Bimatoprost	<1.00E-16	3	Antihypertensive Agents, Cardiovascular Agents,	No	No
Zinc Chloride	<1.00E-16	10	Cosmetics, Mouthwashes,	No	No
Flurazepam	<1.00E-16	2	Anti-Anxiety Agents, Central Nervous System Agents, Central Nervous System Depressants, GABA Agents, GABA Modulators, Hypnotics and Sedatives, Neurotransmitter Agents, Tranquilizing Agents, Psychotropic Drugs,	No	No
Ethambutol	<1.00E-16	2	Anti-Bacterial Agents, Anti-Infective Agents, Antitubercular Agents,	No	No
Micafungin	<1.00E-16	3	Anti-Infective Agents, Antifungal Agents,	No	No
Ethyl Methanesulfonate	<1.00E-16	6	Alkylating Agents, Antineoplastic Agents, Antineoplastic Agents, Alkylating, Noxae, Mutagens,	No	No
Celecoxib	<1.00E-16	301	Analgesics, Analgesics, Non-Narcotic, Anti-Inflammatory Agents, Anti-Inflammatory Agents, Non-Steroidal, Antirheumatic Agents, Cyclooxygenase Inhibitors, Enzyme Inhibitors, Peripheral Nervous System Agents, Sensory System Agents,	No	No
Anidulafungin	<1.00E-16	2	Anti-Infective Agents, Antifungal Agents, Antibiotics, Antifungal,	No	No
Boric Acid	<1.00E-16	2	Pesticides, Insecticides,	No	No
Methoxyflurane	<1.00E-16	3	Anesthetics, Anesthetics, General, Anesthetics, Inhalation, Central Nervous System Agents, Central Nervous System Depressants,	No	No
Fenfluramine	<1.00E-16	3	Neurotransmitter Agents, Neurotransmitter Uptake Inhibitors, Serotonin Agents, Serotonin Uptake Inhibitors,	No	No
Methyl Salicylate	<1.00E-16	5	Antirheumatic Agents, Fixatives,	No	No
Glipizide	<1.00E-16	2	Hypoglycemic Agents,	No	No
Aluminum Hydroxide	<1.00E-16	7	Adjuvants, Immunologic, Antacids, Immunologic Factors,	No	No
Aluminum Chloride	<1.00E-16	3	Astringents, Dermatologic Agents,	No	No
Trichlormethiazide	<1.00E-16	2	Antihypertensive Agents, Cardiovascular Agents, Diuretics, Membrane Transport Modulators, Natriuretic Agents, Sodium Chloride Symporter Inhibitors,	No	No
Gallium Nitrate	<1.00E-16	3	Antineoplastic Agents,	No	No
Pentazocine	<1.00E-16	6	Adjuvants, Anesthesia, Analgesics, Analgesics, Opioid, Central Nervous System Depressants, Central Nervous System Agents, Narcotic Antagonists, Narcotics, Peripheral Nervous System Agents, Sensory System Agents,	No	No
Emla	<1.00E-16	2	Anesthetics, Anesthetics, Combined, Anesthetics, Local, Central Nervous System Agents, Central Nervous System Depressants, Noxae, Oxidants, Peripheral Nervous System Agents, Sensory System Agents,	No	No
Allantoin	<1.00E-16	2	Dermatologic Agents,	No	No
Imatinib	<1.00E-16	610	Antineoplastic Agents, Enzyme Inhibitors, Protein Kinase Inhibitors,	No	No
Tricalcium Phosphate	<1.00E-16	7	Biocompatible Materials,	No	No
Lithium Carbonate	<1.00E-16	4	Antidepressive Agents, Antimanic Agents, Central Nervous System Agents, Central Nervous System Depressants, Enzyme Inhibitors, Tranquilizing Agents, Psychotropic Drugs,	No	No
Orlistat	<1.00E-16	5	Anti-Obesity Agents, Central Nervous System Agents, Enzyme Inhibitors,	No	No
Phytochelatins	<1.00E-16	20	Chelating Agents,	No	No
Naphazoline	<1.00E-16	3	Adrenergic Agonists, Adrenergic alpha-Agonists, Adrenergic Agents, Cardiovascular Agents, Nasal Decongestants, Neurotransmitter Agents, Vasoconstrictor Agents, Respiratory System Agents,	No	No
Menthol	<1.00E-16	4	Antipruritics, Dermatologic Agents,	No	No
Prilocaine	<1.00E-16	2	Anesthetics, Anesthetics, Local, Central Nervous System Depressants, Central Nervous System Agents, Peripheral Nervous System Agents, Sensory System Agents,	No	No
Alendronate	<1.00E-16	9	Bone Density Conservation Agents,	No	No
Hydroxychloroquine	<1.00E-16	11	Anti-Infective Agents, Antimalarials, Antiparasitic Agents, Antiprotozoal Agents, Antirheumatic Agents, Enzyme Inhibitors,	No	No
Permethrin	<1.00E-16	4	Enzyme Inhibitors, Pesticides, Insecticides,	No	No
Ferumoxides	<1.00E-16	2	Contrast Media,	No	No
Bromhexine	<1.00E-16	2	Expectorants, Respiratory System Agents,	No	No
Tipranavir	<1.00E-16	4	Anti-HIV Agents, Anti-Infective Agents, Anti-Retroviral Agents, Antiviral Agents,	No	No
Rofecoxib	<1.00E-16	200	Analgesics, Analgesics, Non-Narcotic, Anti-Inflammatory Agents, Non-Steroidal, Anti-Inflammatory Agents, Cyclooxygenase 2 Inhibitors, Cyclooxygenase Inhibitors, Enzyme Inhibitors, Peripheral Nervous System Agents, Sensory System Agents,	No	No
Ramipril	<1.00E-16	2	Angiotensin-Converting Enzyme Inhibitors, Antihypertensive Agents, Cardiovascular Agents, Enzyme Inhibitors, Protease Inhibitors,	No	No
Pseudoephedrine	<1.00E-16	2	Anti-Asthmatic Agents, Autonomic Agents, Bronchodilator Agents, Cardiovascular Agents, Nasal Decongestants, Peripheral Nervous System Agents, Vasoconstrictor Agents, Respiratory System Agents,	No	No
Econazole	<1.00E-16	7	Anti-Infective Agents, Antifungal Agents,	No	No
Malathion	<1.00E-16	4	Cholinergic Agents, Cholinesterase Inhibitors, Enzyme Inhibitors, Neurotransmitter Agents, Pesticides, Insecticides,	No	No
Benzoflavones	<1.00E-16	8	Enzyme Inhibitors,	No	No
Prochlorperazine	<1.00E-16	2	Antiemetics, Autonomic Agents, Antipsychotic Agents, Central Nervous System Depressants, Central Nervous System Agents, Dopamine Agents, Dopamine Antagonists, Gastrointestinal Agents, Peripheral Nervous System Agents, Neurotransmitter Agents, Tranquilizing Agents, Psychotropic Drugs,	No	No
Benazepril	<1.00E-16	3	Angiotensin-Converting Enzyme Inhibitors, Antihypertensive Agents, Cardiovascular Agents, Enzyme Inhibitors, Protease Inhibitors,	No	No
Nitrazepam	<1.00E-16	5	Anti-Anxiety Agents, Anticonvulsants, Central Nervous System Agents, Central Nervous System Depressants, GABA Agents, GABA Modulators, Hypnotics and Sedatives, Neurotransmitter Agents, Tranquilizing Agents, Psychotropic Drugs,	No	No
Dorzolamide	<1.00E-16	3	Antihypertensive Agents, Carbonic Anhydrase Inhibitors, Cardiovascular Agents, Enzyme Inhibitors,	No	No
Guaifenesin	<1.00E-16	3	Expectorants, Respiratory System Agents,	No	No
Oxandrolone	<1.00E-16	3	Anabolic Agents, Androgens, Hormones, Hormone Substitutes, and Hormone Antagonists, Hormones,	No	No
Entacapone	<1.00E-16	2	Anti-Dyskinesia Agents, Antiparkinson Agents, Central Nervous System Agents, Enzyme Inhibitors,	No	No
Podophyllin	<1.00E-16	8	Antineoplastic Agents, Phytogenic, Antineoplastic Agents, Caustics, Dermatologic Agents, Noxae, Keratolytic Agents,	No	No
Aprepitant	<1.00E-16	2	Antiemetics, Autonomic Agents, Central Nervous System Agents, Gastrointestinal Agents, Peripheral Nervous System Agents,	No	No
Lenograstim	<1.00E-16	3	Adjuvants, Immunologic, Immunologic Factors,	No	No
Mexiletine	<1.00E-16	4	Anti-Arrhythmia Agents, Cardiovascular Agents,	No	No
Cyclobenzaprine	<1.00E-16	2	Antidepressive Agents, Antidepressive Agents, Tricyclic, Central Nervous System Agents, Central Nervous System Depressants, Muscle Relaxants, Central, Neuromuscular Agents, Peripheral Nervous System Agents, Tranquilizing Agents, Psychotropic Drugs,	No	No
Sevelamer	<1.00E-16	2	Chelating Agents,	No	No
Anthralin	<1.00E-16	4	Dermatologic Agents,	No	No
Amodiaquine	<1.00E-16	3	Anti-Infective Agents, Antimalarials, Antiparasitic Agents, Antiprotozoal Agents,	No	No
Selegiline	<1.00E-16	7	Anti-Dyskinesia Agents, Antiparkinson Agents, Central Nervous System Agents, Enzyme Inhibitors, Monoamine Oxidase Inhibitors, Protective Agents, Neuroprotective Agents,	No	No
Cinnarizine	<1.00E-16	3	Cardiovascular Agents, Calcium Channel Blockers, Membrane Transport Modulators, Neurotransmitter Agents, Histamine Agents, Histamine Antagonists, Histamine H1 Antagonists,	No	No
Mefloquine	<1.00E-16	5	Anti-Infective Agents, Antimalarials, Antiparasitic Agents, Antiprotozoal Agents,	No	No
Abacavir	<1.00E-16	2	Anti-Infective Agents, Anti-HIV Agents, Anti-Retroviral Agents, Antiviral Agents, Enzyme Inhibitors, Nucleic Acid Synthesis Inhibitors, Reverse Transcriptase Inhibitors,	No	No
Debrisoquin	<1.00E-16	3	Adrenergic Agents, Antihypertensive Agents, Autonomic Agents, Cardiovascular Agents, Peripheral Nervous System Agents, Neurotransmitter Agents, Sympatholytics,	No	No
Topiramate	<1.00E-16	56	Anticonvulsants, Anti-Obesity Agents, Central Nervous System Agents, Protective Agents, Neuroprotective Agents,	No	No
Indapamide	<1.00E-16	5	Antihypertensive Agents, Cardiovascular Agents, Diuretics, Natriuretic Agents,	No	No
Aripiprazole	<1.00E-16	3	Antipsychotic Agents, Central Nervous System Agents, Central Nervous System Depressants, Tranquilizing Agents, Psychotropic Drugs,	No	No
Ambisome	<1.00E-16	2	Anti-Infective Agents, Antifungal Agents, Antibiotics, Antifungal, Antiparasitic Agents, Antiprotozoal Agents,	No	No
Sodium Thiosulfate	<1.00E-16	5	Anti-Bacterial Agents, Anti-Infective Agents, Antidotes, Antioxidants, Antitubercular Agents, Chelating Agents, Protective Agents,	No	No
Colistin	<1.00E-16	2	Anti-Bacterial Agents, Anti-Infective Agents,	No	No
Tirofiban	<1.00E-16	2	Cardiovascular Agents, Fibrinolytic Agents, Fibrin Modulating Agents, Hematologic Agents, Platelet Aggregation Inhibitors,	No	No
Deflazacort	<1.00E-16	2	Anti-Inflammatory Agents, Immunologic Factors, Immunosuppressive Agents,	No	No
Methohexital	<1.00E-16	2	Anesthetics, Anesthetics, General, Anesthetics, Intravenous, Central Nervous System Agents, Central Nervous System Depressants,	No	No
Salicylates	<1.00E-16	8	Analgesics, Analgesics, Non-Narcotic, Anti-Inflammatory Agents, Non-Steroidal, Anti-Inflammatory Agents, Antirheumatic Agents, Cyclooxygenase Inhibitors, Enzyme Inhibitors, Peripheral Nervous System Agents, Sensory System Agents,	No	No
Ephedrine	<1.00E-16	7	Adrenergic Agents, Autonomic Agents, Cardiovascular Agents, Central Nervous System Agents, Central Nervous System Stimulants, Peripheral Nervous System Agents, Neurotransmitter Agents, Sympathomimetics, Vasoconstrictor Agents,	No	No
Triamterene	<1.00E-16	2	Diuretics, Natriuretic Agents,	No	No
Mitotane	<1.00E-16	4	Antineoplastic Agents, Hormonal, Antineoplastic Agents,	No	No
Perphenazine	<1.00E-16	3	Antipsychotic Agents, Central Nervous System Depressants, Central Nervous System Agents, Dopamine Agents, Dopamine Antagonists, Neurotransmitter Agents, Tranquilizing Agents, Psychotropic Drugs,	No	No
Palivizumab	<1.00E-16	2	Anti-Infective Agents, Antiviral Agents,	No	No
Dydrogesterone	<1.00E-16	2	Hormones, Hormones, Hormone Substitutes, and Hormone Antagonists, Progestins,	No	No
Telmisartan	<1.00E-16	2	Angiotensin II Type 1 Receptor Blockers, Angiotensin-Converting Enzyme Inhibitors, Enzyme Inhibitors, Protease Inhibitors,	No	No
Domperidone	<1.00E-16	7	Antiemetics, Autonomic Agents, Central Nervous System Agents, Dopamine Agents, Dopamine Antagonists, Gastrointestinal Agents, Peripheral Nervous System Agents, Neurotransmitter Agents,	No	No
Memantine	<1.00E-16	4	Anti-Dyskinesia Agents, Antiparkinson Agents, Central Nervous System Agents, Dopamine Agents, Excitatory Amino Acid Agents, Excitatory Amino Acid Antagonists, Neurotransmitter Agents,	No	No
Pyrithione	<1.00E-16	5	Anti-Infective Agents, Antifungal Agents,	No	No
Pectins	<1.00E-16	6	Food Additives,	No	No
Peginterferon Alfa-2B	<1.00E-16	2	Anti-Infective Agents, Antiviral Agents,	No	No
Trimethadione	<1.00E-16	4	Anticonvulsants, Central Nervous System Agents,	No	No
Tropicamide	<1.00E-16	2	Autonomic Agents, Cholinergic Agents, Cholinergic Antagonists, Muscarinic Antagonists, Mydriatics, Peripheral Nervous System Agents, Neurotransmitter Agents,	No	No
Methyltestosterone	<1.00E-16	7	Anabolic Agents, Antineoplastic Agents, Hormonal, Antineoplastic Agents, Hormones, Hormone Substitutes, and Hormone Antagonists, Hormones,	No	No
Carbidopa	<1.00E-16	6	Anti-Dyskinesia Agents, Antiparkinson Agents, Central Nervous System Agents, Dopamine Agents, Enzyme Inhibitors, Neurotransmitter Agents,	No	No
Levocabastine	<1.00E-16	2	Histamine Agents, Histamine Antagonists, Neurotransmitter Agents, Histamine H1 Antagonists, Histamine H1 Antagonists, Non-Sedating,	No	No
Telithromycin	<1.00E-16	12	Anti-Bacterial Agents, Anti-Infective Agents,	No	No
Ketotifen	<1.00E-16	2	Anti-Allergic Agents, Antipruritics, Dermatologic Agents, Histamine Agents, Histamine Antagonists, Histamine H1 Antagonists, Neurotransmitter Agents,	No	No
Pokeweed Mitogens	<1.00E-16	9	Mitogens, Mitosis Modulators,	No	No
Pramlintide	<1.00E-16	2	Hypoglycemic Agents,	No	No
Metrizamide	<1.00E-16	5	Contrast Media,	No	No
Collodion	<1.00E-16	6	Explosive Agents, Surgical Fixation Devices, Tissue Adhesives,	No	No
Milrinone	<1.00E-16	3	Cardiotonic Agents, Cardiovascular Agents, Enzyme Inhibitors, Protective Agents, Hematologic Agents, Phosphodiesterase Inhibitors, Platelet Aggregation Inhibitors, Vasodilator Agents,	No	No
Trastuzumab	<1.00E-16	296	Antineoplastic Agents,	No	No
Sodium Citrate	<1.00E-16	11	Buffers,	No	No
Fludrocortisone	<1.00E-16	3	Anti-Inflammatory Agents,	No	No
Hexamethonium	<1.00E-16	9	Antihypertensive Agents, Autonomic Agents, Cardiovascular Agents, Cholinergic Agents, Cholinergic Antagonists, Ganglionic Blockers, Peripheral Nervous System Agents, Neurotransmitter Agents, Nicotinic Antagonists,	No	No
Sulfisoxazole	<1.00E-16	3	Anti-Infective Agents,	No	No
Loratadine	<1.00E-16	5	Anti-Allergic Agents, Antipruritics, Dermatologic Agents, Histamine Agents, Histamine Antagonists, Neurotransmitter Agents, Histamine H1 Antagonists, Histamine H1 Antagonists, Non-Sedating,	No	No
Triprolidine	<1.00E-16	2	Anti-Allergic Agents, Histamine Agents, Histamine Antagonists, Histamine H1 Antagonists, Neurotransmitter Agents,	No	No
Dexfenfluramine	<1.00E-16	3	Neurotransmitter Agents, Serotonin Agents, Serotonin Agonists,	No	No
Flurothyl	<1.00E-16	6	Central Nervous System Agents, Central Nervous System Stimulants, Convulsants,	No	No
Etretinate	<1.00E-16	3	Dermatologic Agents, Keratolytic Agents,	No	No
Dutasteride	<1.00E-16	5	Enzyme Inhibitors,	No	No
Carbetapentane	<1.00E-16	2	Antitussive Agents, Central Nervous System Agents, Respiratory System Agents,	No	No
Ciguatoxins	<1.00E-16	6	Noxae, Poisons,	No	No
Rizatriptan	<1.00E-16	3	Neurotransmitter Agents, Serotonin Agents, Serotonin Agonists,	No	No
Pimecrolimus	<1.00E-16	2	Analgesics, Analgesics, Non-Narcotic, Anti-Inflammatory Agents, Non-Steroidal, Anti-Inflammatory Agents, Antirheumatic Agents, Dermatologic Agents, Immunologic Factors, Immunosuppressive Agents, Peripheral Nervous System Agents, Sensory System Agents,	No	No
Piperonyl Butoxide	<1.00E-16	3	Pesticide Synergists, Pesticides,	No	No
Eprosartan	<1.00E-16	2	Angiotensin II Type 1 Receptor Blockers, Antihypertensive Agents, Cardiovascular Agents,	No	No
Voriconazole	<1.00E-16	3	Anti-Infective Agents, Antifungal Agents,	No	No
Sulfadoxine	<1.00E-16	2	Anti-Infective Agents, Anti-Infective Agents, Urinary, Antimalarials, Antiparasitic Agents, Antiprotozoal Agents, Renal Agents,	No	No
Trandolapril	<1.00E-16	2	Angiotensin-Converting Enzyme Inhibitors, Antihypertensive Agents, Cardiovascular Agents, Enzyme Inhibitors, Protease Inhibitors,	No	No
Mivacurium	<1.00E-16	3	Neuromuscular Agents, Neuromuscular Blocking Agents, Neuromuscular Nondepolarizing Agents, Peripheral Nervous System Agents,	No	No
Quinapril	<1.00E-16	3	Angiotensin-Converting Enzyme Inhibitors, Antihypertensive Agents, Cardiovascular Agents, Enzyme Inhibitors, Protease Inhibitors,	No	No
Guanabenz	<1.00E-16	2	Adrenergic Agonists, Adrenergic alpha-Agonists, Adrenergic Agents, Antihypertensive Agents, Cardiovascular Agents, Neurotransmitter Agents,	No	No
Alfuzosin	<1.00E-16	2	Adrenergic alpha-Antagonists, Adrenergic Antagonists, Adrenergic Agents, Antihypertensive Agents, Cardiovascular Agents, Neurotransmitter Agents,	No	No
Vardenafil	<1.00E-16	4	Enzyme Inhibitors, Phosphodiesterase Inhibitors,	No	No
Tropisetron	<1.00E-16	5	Antiemetics, Autonomic Agents, Central Nervous System Agents, Peripheral Nervous System Agents, Neurotransmitter Agents, Serotonin Agents, Serotonin Antagonists, Gastrointestinal Agents,	No	No
Zinc Oxide	<1.00E-16	5	Cosmetics, Dermatologic Agents, Protective Agents, Sunscreening Agents, Radiation-Protective Agents,	No	No
Oxazepam	<1.00E-16	5	Anti-Anxiety Agents, Central Nervous System Agents, Central Nervous System Depressants, GABA Agents, GABA Modulators, Hypnotics and Sedatives, Neurotransmitter Agents, Tranquilizing Agents, Psychotropic Drugs,	No	No
Lamotrigine	<1.00E-16	78	Anticonvulsants, Cardiovascular Agents, Calcium Channel Blockers, Central Nervous System Agents, Membrane Transport Modulators,	No	No
Rasagiline	<1.00E-16	4	Central Nervous System Agents, Enzyme Inhibitors, Monoamine Oxidase Inhibitors, Protective Agents, Neuroprotective Agents,	No	No
Mesalamine	<1.00E-16	2	Analgesics, Analgesics, Non-Narcotic, Anti-Inflammatory Agents, Non-Steroidal, Anti-Inflammatory Agents, Antirheumatic Agents, Peripheral Nervous System Agents, Sensory System Agents,	No	No
Pyrazinamide	<1.00E-16	4	Anti-Bacterial Agents, Anti-Infective Agents, Antitubercular Agents,	No	No
Clobetasol	<1.00E-16	2	Adrenal Cortex Hormones, Anti-Inflammatory Agents, Hormones, Hormones, Hormone Substitutes, and Hormone Antagonists, Glucocorticoids,	No	No
Praziquantel	<1.00E-16	2	Anthelmintics, Anti-Infective Agents, Antiparasitic Agents,	No	No
Amoxapine	<1.00E-16	2	Adrenergic Agents, Adrenergic Uptake Inhibitors, Antidepressive Agents, Antidepressive Agents, Second-Generation, Central Nervous System Agents, Dopamine Agents, Dopamine Antagonists, Neurotransmitter Agents, Neurotransmitter Uptake Inhibitors, Serotonin Agents, Serotonin Uptake Inhibitors, Psychotropic Drugs,	No	No
Digitoxin	<1.00E-16	6	Anti-Arrhythmia Agents, Cardiotonic Agents, Cardiovascular Agents, Enzyme Inhibitors, Protective Agents,	No	No
Zafirlukast	<1.00E-16	2	Anti-Asthmatic Agents, Hormones, Hormone Substitutes, and Hormone Antagonists, Hormone Antagonists, Leukotriene Antagonists, Respiratory System Agents,	No	No
Omalizumab	<1.00E-16	2	Anti-Allergic Agents, Anti-Asthmatic Agents, Respiratory System Agents,	No	No
Ritodrine	<1.00E-16	2	Adrenergic Agents, Adrenergic Agonists, Adrenergic beta-Agonists, Autonomic Agents, Peripheral Nervous System Agents, Neurotransmitter Agents, Sympathomimetics, Tocolytic Agents, Reproductive Control Agents,	No	No
Dimercaprol	<1.00E-16	2	Chelating Agents,	No	No
Olmesartan Medoxomil	<1.00E-16	2	Angiotensin II Type 1 Receptor Blockers, Antihypertensive Agents, Cardiovascular Agents,	No	No
Suprofen	<1.00E-16	3	Analgesics, Analgesics, Non-Narcotic, Anti-Inflammatory Agents, Non-Steroidal, Anti-Inflammatory Agents, Antirheumatic Agents, Cyclooxygenase Inhibitors, Enzyme Inhibitors, Peripheral Nervous System Agents, Sensory System Agents,	No	No
Trazodone	<1.00E-16	2	Anti-Anxiety Agents, Antidepressive Agents, Antidepressive Agents, Second-Generation, Central Nervous System Depressants, Central Nervous System Agents, Neurotransmitter Agents, Neurotransmitter Uptake Inhibitors, Serotonin Agents, Serotonin Uptake Inhibitors, Tranquilizing Agents, Psychotropic Drugs,	No	No
Gadodiamide	<1.00E-16	3	Contrast Media,	No	No
Methyldopa	<1.00E-16	2	Adrenergic Agonists, Adrenergic alpha-Agonists, Adrenergic Agents, Antihypertensive Agents, Autonomic Agents, Cardiovascular Agents, Peripheral Nervous System Agents, Neurotransmitter Agents, Sympatholytics,	No	No
Daptomycin	<1.00E-16	4	Anti-Bacterial Agents, Anti-Infective Agents,	No	No
Cetylpyridinium	<1.00E-16	3	Anti-Infective Agents, Anti-Infective Agents, Local, Detergents, Surface-Active Agents,	No	No
Adefovir	<1.00E-16	2	Anti-Infective Agents, Anti-Retroviral Agents, Antiviral Agents, Enzyme Inhibitors, Nucleic Acid Synthesis Inhibitors, Reverse Transcriptase Inhibitors,	No	No
Acetic Acid	<1.00E-16	341	Indicators and Reagents,	No	No
Naproxen	<1.00E-16	86	Analgesics, Analgesics, Non-Narcotic, Anti-Inflammatory Agents, Non-Steroidal, Anti-Inflammatory Agents, Antirheumatic Agents, Cyclooxygenase Inhibitors, Enzyme Inhibitors, Peripheral Nervous System Agents, Gout Suppressants, Sensory System Agents,	No	No
Thiabendazole	<1.00E-16	5	Anthelmintics, Anti-Infective Agents, Antiparasitic Agents,	No	No
Encainide	<1.00E-16	2	Anti-Arrhythmia Agents, Cardiovascular Agents, Membrane Transport Modulators, Sodium Channel Blockers,	No	No
Sertindole	<1.00E-16	2	Antipsychotic Agents, Central Nervous System Depressants, Central Nervous System Agents, Tranquilizing Agents, Psychotropic Drugs,	No	No
Gabapentin	<1.00E-16	230	Analgesics, Anti-Anxiety Agents, Anti-Dyskinesia Agents, Anticonvulsants, Antimanic Agents, Antiparkinson Agents, Cardiovascular Agents, Calcium Channel Blockers, Central Nervous System Agents, Central Nervous System Depressants, Excitatory Amino Acid Agents, Excitatory Amino Acid Antagonists, Membrane Transport Modulators, Peripheral Nervous System Agents, Neurotransmitter Agents, Tranquilizing …	No	No
Raltitrexed	<1.00E-16	5	Antimetabolites, Antimetabolites, Antineoplastic, Antineoplastic Agents, Enzyme Inhibitors, Folic Acid Antagonists, Noxae,	No	No
Ezetimibe	<1.00E-16	3	Anticholesteremic Agents, Antilipemic Agents, Antimetabolites,	No	No
Norgestrel	<1.00E-16	3	Contraceptive Agents, Contraceptive Agents, Female, Contraceptives, Oral, Contraceptives, Oral, Synthetic, Reproductive Control Agents,	No	No
Eletriptan	<1.00E-16	2	Neurotransmitter Agents, Serotonin Agents, Serotonin Agonists,	No	No
Norgestimate	<1.00E-16	2	Contraceptive Agents, Contraceptive Agents, Female, Contraceptives, Oral, Contraceptives, Oral, Synthetic, Reproductive Control Agents,	No	No
Famotidine	<1.00E-16	2	Anti-Ulcer Agents, Gastrointestinal Agents, Histamine Agents, Neurotransmitter Agents, Histamine Antagonists, Histamine H2 Antagonists,	No	No
Desloratadine	<1.00E-16	3	Cholinergic Agents, Cholinergic Antagonists, Neurotransmitter Agents, Histamine Agents, Histamine Antagonists, Histamine H1 Antagonists, Histamine H1 Antagonists, Non-Sedating,	No	No
Acebutolol	<1.00E-16	2	Adrenergic Antagonists, Adrenergic Agents, Adrenergic beta-Antagonists, Anti-Arrhythmia Agents, Antihypertensive Agents, Cardiovascular Agents, Neurotransmitter Agents,	No	No
Myeloma Proteins	<1.00E-16	9	Immunologic Factors,	No	No
Doxapram	<1.00E-16	2	Central Nervous System Agents, Central Nervous System Stimulants, Respiratory System Agents,	No	No
Griseofulvin	<1.00E-16	6	Anti-Infective Agents, Antifungal Agents, Antibiotics, Antifungal,	No	No
Treprostinil	<1.00E-16	2	Antihypertensive Agents, Cardiovascular Agents,	No	No
Naratriptan	<1.00E-16	6	Cardiovascular Agents, Neurotransmitter Agents, Serotonin Agents, Serotonin Agonists, Vasoconstrictor Agents,	No	No
Darbepoetin Alfa	<1.00E-16	4	Hematinics, Hematologic Agents,	No	No
Isosorbide Dinitrate	<1.00E-16	4	Cardiovascular Agents, Nitric Oxide Donors, Vasodilator Agents,	No	No
Repaglinide	<1.00E-16	2	Hypoglycemic Agents,	No	No
Colestipol	<1.00E-16	2	Anion Exchange Resins, Antilipemic Agents, Antimetabolites, Ion Exchange Resins,	No	No
Oxprenolol	<1.00E-16	2	Adrenergic Agents, Adrenergic Antagonists, Adrenergic beta-Antagonists, Anti-Anxiety Agents, Anti-Arrhythmia Agents, Antihypertensive Agents, Autonomic Agents, Cardiovascular Agents, Central Nervous System Agents, Central Nervous System Depressants, Peripheral Nervous System Agents, Neurotransmitter Agents, Sympatholytics, Tranquilizing Agents, Psychotropic Drugs, Vasodilator Agents,	No	No
Acetylmuramyl-Alanyl-Isoglutamine	<1.00E-16	6	Adjuvants, Immunologic, Immunologic Factors,	No	No
Penciclovir	<1.00E-16	5	Anti-Infective Agents, Antiviral Agents,	No	No
Formoterol	<1.00E-16	2	Adrenergic Agonists, Adrenergic Agents, Adrenergic beta-Agonists, Anti-Asthmatic Agents, Autonomic Agents, Bronchodilator Agents, Peripheral Nervous System Agents, Neurotransmitter Agents, Respiratory System Agents,	No	No
Fenoldopam	<1.00E-16	4	Antihypertensive Agents, Cardiovascular Agents, Dopamine Agents, Dopamine Agonists, Neurotransmitter Agents, Vasodilator Agents,	No	No
Buprenorphine	<1.00E-16	6	Analgesics, Analgesics, Opioid, Central Nervous System Agents, Central Nervous System Depressants, Narcotic Antagonists, Narcotics, Peripheral Nervous System Agents, Sensory System Agents,	No	No
Stanozolol	<1.00E-16	2	Anabolic Agents, Androgens, Hormones, Hormone Substitutes, and Hormone Antagonists, Hormones,	No	No
Posaconazole	<1.00E-16	2	Anti-Infective Agents, Antifungal Agents, Antibiotics, Antifungal, Antiparasitic Agents, Antiprotozoal Agents, Trypanocidal Agents,	No	No
Cimetidine	<1.00E-16	48	Anti-Ulcer Agents, Enzyme Inhibitors, Gastrointestinal Agents, Neurotransmitter Agents, Histamine Agents, Histamine Antagonists, Histamine H2 Antagonists,	Yes	No
Glycerol	<1.00E-16	472	Cryoprotective Agents, Protective Agents, Solvents,	Yes	No
Naloxone	<1.00E-16	100	Central Nervous System Agents, Narcotic Antagonists, Peripheral Nervous System Agents, Sensory System Agents,	Yes	No
Thiamine	<1.00E-16	36	Micronutrients, Growth Substances, Vitamin B Complex, Vitamins,	No	No
Lovastatin	<1.00E-16	143	Anticholesteremic Agents, Antilipemic Agents, Antimetabolites, Enzyme Inhibitors, Hydroxymethylglutaryl-CoA Reductase Inhibitors,	Yes	No
Chlorpromazine	<1.00E-16	55	Antiemetics, Antipsychotic Agents, Autonomic Agents, Central Nervous System Agents, Central Nervous System Depressants, Dopamine Agents, Dopamine Antagonists, Gastrointestinal Agents, Peripheral Nervous System Agents, Neurotransmitter Agents, Tranquilizing Agents, Psychotropic Drugs,	Yes	No
Oxytocin	<1.00E-16	124	Oxytocics, Reproductive Control Agents,	Yes	No
Gemcitabine	<1.00E-16	192	Anti-Infective Agents, Antineoplastic Agents, Antimetabolites, Antimetabolites, Antineoplastic, Antiviral Agents, Enzyme Inhibitors, Noxae, Immunologic Factors, Immunosuppressive Agents, Radiation-Sensitizing Agents,	No	No
Verapamil	<1.00E-16	334	Anti-Arrhythmia Agents, Calcium Channel Blockers, Cardiovascular Agents, Membrane Transport Modulators, Vasodilator Agents,	Yes	No
Serotonin	<1.00E-16	261	Neurotransmitter Agents, Serotonin Agents,	Yes	No
Benzoic Acid	<1.00E-16	55	Food Additives, Food Preservatives,	No	No
Carmustine	<1.00E-16	135	Alkylating Agents, Antineoplastic Agents, Antineoplastic Agents, Alkylating, Noxae,	Yes	No
Chromium	<1.00E-16	166	Micronutrients, Growth Substances, Trace Elements,	Yes	No
Capsaicin	<1.00E-16	85	Antipruritics, Dermatologic Agents, Peripheral Nervous System Agents, Sensory System Agents,	No	No
Annexin A5	<1.00E-16	263	Enzyme Inhibitors,	Yes	No
Pyridoxal	<1.00E-16	74	Micronutrients, Growth Substances, Vitamin B Complex, Vitamins,	No	No
Ganciclovir	<1.00E-16	82	Anti-Infective Agents, Antiviral Agents,	Yes	No
Simvastatin	<1.00E-16	59	Anticholesteremic Agents, Antilipemic Agents, Antimetabolites, Enzyme Inhibitors, Hydroxymethylglutaryl-CoA Reductase Inhibitors,	No	No
Cyclosporine	<1.00E-16	454	Anti-Infective Agents, Antifungal Agents, Antirheumatic Agents, Dermatologic Agents, Enzyme Inhibitors, Immunologic Factors, Immunosuppressive Agents,	Yes	No
Chorionic Gonadotropin	<1.00E-16	168	Reproductive Control Agents,	Yes	No
Novobiocin	<1.00E-16	68	Anti-Infective Agents, Anti-Bacterial Agents, Enzyme Inhibitors, Nucleic Acid Synthesis Inhibitors,	No	No
Epinephrine	<1.00E-16	167	Adrenergic Agonists, Adrenergic alpha-Agonists, Adrenergic Agents, Adrenergic beta-Agonists, Anti-Asthmatic Agents, Autonomic Agents, Cardiovascular Agents, Bronchodilator Agents, Mydriatics, Peripheral Nervous System Agents, Neurotransmitter Agents, Sympathomimetics, Vasoconstrictor Agents, Respiratory System Agents,	Yes	No
Thyrotropin-Releasing Hormone	<1.00E-16	57	Hormones, Hormone Substitutes, and Hormone Antagonists, Hormones,	Yes	No
Fluorouracil	<1.00E-16	844	Antineoplastic Agents, Antimetabolites, Antimetabolites, Antineoplastic, Noxae, Immunologic Factors, Immunosuppressive Agents,	Yes	No
Nicotine	<1.00E-16	172	Autonomic Agents, Cholinergic Agents, Cholinergic Agonists, Ganglionic Stimulants, Peripheral Nervous System Agents, Neurotransmitter Agents, Nicotinic Agonists,	Yes	No
Plasmin	<1.00E-16	123	Cardiovascular Agents, Fibrinolytic Agents, Fibrin Modulating Agents, Hematologic Agents,	Yes	No
Ibuprofen	<1.00E-16	110	Analgesics, Analgesics, Non-Narcotic, Anti-Inflammatory Agents, Non-Steroidal, Anti-Inflammatory Agents, Antirheumatic Agents, Central Nervous System Agents, Cyclooxygenase Inhibitors, Enzyme Inhibitors, Peripheral Nervous System Agents, Sensory System Agents,	No	No
Pioglitazone	<1.00E-16	52	Hypoglycemic Agents,	No	No
Raloxifene	<1.00E-16	135	Bone Density Conservation Agents, Estrogen Antagonists, Estrogen Receptor Modulators, Hormones, Hormone Substitutes, and Hormone Antagonists, Hormone Antagonists, Selective Estrogen Receptor Modulators,	No	No
Calcitriol	<1.00E-16	248	Cardiovascular Agents, Bone Density Conservation Agents, Calcium Channel Agonists, Membrane Transport Modulators, Micronutrients, Growth Substances, Vasoconstrictor Agents, Vitamins,	Yes	No
Caseins	<1.00E-16	214	Chelating Agents,	Yes	No
Fluoroquinolones	<1.00E-16	421	Anti-Bacterial Agents, Anti-Infective Agents, Enzyme Inhibitors, Nucleic Acid Synthesis Inhibitors,	No	No
Interferon Type Ii	<1.00E-16	1303	Anti-Infective Agents, Antiviral Agents,	Yes	No
Tetradecanoylphorbol Acetate	<1.00E-16	2169	Carcinogens, Noxae,	Yes	No
Acyclovir	<1.00E-16	31	Anti-Infective Agents, Antiviral Agents,	No	No
Cytarabine	<1.00E-16	331	Anti-Infective Agents, Antimetabolites, Antimetabolites, Antineoplastic, Antineoplastic Agents, Antiviral Agents, Noxae, Immunologic Factors, Immunosuppressive Agents,	Yes	No
Digoxin	<1.00E-16	108	Anti-Arrhythmia Agents, Cardiotonic Agents, Cardiovascular Agents, Enzyme Inhibitors, Protective Agents,	No	No
Troglitazone	<1.00E-16	91	Hypoglycemic Agents,	No	No
Penicillin G	<1.00E-16	158	Anti-Infective Agents, Anti-Bacterial Agents,	No	No
Tolbutamide	<1.00E-16	20	Hypoglycemic Agents,	Yes	No
Teniposide	<1.00E-16	73	Antineoplastic Agents, Enzyme Inhibitors, Nucleic Acid Synthesis Inhibitors,	No	No
Moxifloxacin	<1.00E-16	113	Anti-Infective Agents,	No	No
Nifedipine	<1.00E-16	153	Cardiovascular Agents, Calcium Channel Blockers, Membrane Transport Modulators, Tocolytic Agents, Vasodilator Agents, Reproductive Control Agents,	Yes	No
Dasatinib	<1.00E-16	45	Enzyme Inhibitors, Protein Kinase Inhibitors,	No	No
Citric Acid	<1.00E-16	36	Anticoagulants, Chelating Agents, Hematologic Agents,	Yes	No
Niacinamide	<1.00E-16	83	Micronutrients, Growth Substances, Vitamin B Complex, Vitamins,	Yes	No
Interleukin-4	<1.00E-16	380	Adjuvants, Immunologic, Antineoplastic Agents, Antirheumatic Agents, Immunologic Factors,	Yes	No
Testosterone	<1.00E-16	670	Androgens, Hormones, Hormone Substitutes, and Hormone Antagonists, Hormones,	Yes	No
Immunoglobulins	<1.00E-16	356	Immunologic Factors,	Yes	No
Glucose	<1.00E-16	3366	Flavoring Agents, Food Additives, Sweetening Agents,	Yes	No
Tuberculin	<1.00E-16	32	Indicators and Reagents,	No	No
Cisplatin	<1.00E-16	2011	Antineoplastic Agents, Cross-Linking Reagents, Indicators and Reagents, Radiation-Sensitizing Agents,	Yes	No
Interleukin-2	<1.00E-16	873	Analgesics, Analgesics, Non-Narcotic, Antineoplastic Agents, Central Nervous System Agents, Peripheral Nervous System Agents, Sensory System Agents,	Yes	No
Vitamin E	<1.00E-16	288	Antioxidants, Micronutrients, Protective Agents, Growth Substances, Vitamins,	Yes	No
Rosiglitazone	<1.00E-16	102	Hypoglycemic Agents,	No	No
Rose Bengal	<1.00E-16	64	Coloring Agents, Fluorescent Dyes, Luminescent Agents, Indicators and Reagents,	Yes	No
Rituximab	<1.00E-16	51	Antineoplastic Agents, Antirheumatic Agents, Immunologic Factors,	No	No
Fructose	<1.00E-16	171	Flavoring Agents, Food Additives, Sweetening Agents,	Yes	No
Haloperidol	<1.00E-16	74	Anti-Dyskinesia Agents, Antiemetics, Autonomic Agents, Antipsychotic Agents, Central Nervous System Agents, Central Nervous System Depressants, Dopamine Agents, Dopamine Antagonists, Gastrointestinal Agents, Peripheral Nervous System Agents, Neurotransmitter Agents, Tranquilizing Agents, Psychotropic Drugs,	No	No
Tetrahydrocannabinol	<1.00E-16	21	Analgesics, Analgesics, Non-Narcotic, Central Nervous System Agents, Hallucinogens, Peripheral Nervous System Agents, Psychotropic Drugs, Sensory System Agents,	No	No
Trifluoperazine	<1.00E-16	61	Antiemetics, Autonomic Agents, Antipsychotic Agents, Central Nervous System Depressants, Central Nervous System Agents, Dopamine Agents, Dopamine Antagonists, Peripheral Nervous System Agents, Neurotransmitter Agents, Gastrointestinal Agents, Tranquilizing Agents, Psychotropic Drugs,	Yes	No
Dobutamine	<1.00E-16	28	Adrenergic Agonists, Adrenergic Agents, Adrenergic beta-Agonists, Autonomic Agents, Cardiotonic Agents, Cardiovascular Agents, Protective Agents, Peripheral Nervous System Agents, Neurotransmitter Agents, Sympathomimetics,	No	No
Indoleacetic Acids	<1.00E-16	104	Growth Substances, Plant Growth Regulators,	No	No
Autoantibodies	<1.00E-16	418	Immunologic Factors,	Yes	No
Carboplatin	<1.00E-16	174	Antineoplastic Agents, Cross-Linking Reagents, Indicators and Reagents,	Yes	No
Factor Viii	<1.00E-16	126	Coagulants, Hematologic Agents,	Yes	No
Pravastatin	<1.00E-16	37	Anticholesteremic Agents, Antilipemic Agents, Antimetabolites, Enzyme Inhibitors, Hydroxymethylglutaryl-CoA Reductase Inhibitors,	No	No
Pepsin A	<1.00E-16	52	Gastrointestinal Agents,	Yes	No
Prednisone	<1.00E-16	215	Adrenal Cortex Hormones, Anti-Inflammatory Agents, Antineoplastic Agents, Hormonal, Antineoplastic Agents, Hormones, Hormone Substitutes, and Hormone Antagonists, Hormones, Glucocorticoids,	Yes	No
Propranolol	<1.00E-16	206	Adrenergic Agents, Adrenergic Antagonists, Adrenergic beta-Antagonists, Anti-Arrhythmia Agents, Antihypertensive Agents, Cardiovascular Agents, Neurotransmitter Agents, Vasodilator Agents,	Yes	No
Amsacrine	<1.00E-16	93	Antineoplastic Agents, Indicators and Reagents, Intercalating Agents,	Yes	No
Betaine	<1.00E-16	30	Antilipemic Agents, Antimetabolites, Gastrointestinal Agents, Lipotropic Agents,	No	No
Acetazolamide	<1.00E-16	123	Anticonvulsants, Carbonic Anhydrase Inhibitors, Central Nervous System Agents, Diuretics, Enzyme Inhibitors, Natriuretic Agents,	Yes	No
Clozapine	<1.00E-16	33	Antipsychotic Agents, Central Nervous System Agents, Central Nervous System Depressants, GABA Agents, GABA Antagonists, Neurotransmitter Agents, Serotonin Agents, Serotonin Antagonists, Tranquilizing Agents, Psychotropic Drugs,	No	No
Metformin	<1.00E-16	117	Hypoglycemic Agents,	No	No
Enalapril	<1.00E-16	33	Angiotensin-Converting Enzyme Inhibitors, Antihypertensive Agents, Cardiovascular Agents, Enzyme Inhibitors, Protease Inhibitors,	No	No
Amiloride	<1.00E-16	124	Cardiovascular Agents, Diuretics, Membrane Transport Modulators, Natriuretic Agents, Sodium Channel Blockers,	Yes	No
Immunoglobulin G	<1.00E-16	810	Immunologic Factors,	Yes	No
Amphetamine	<1.00E-16	90	Adrenergic Agents, Adrenergic Uptake Inhibitors, Autonomic Agents, Central Nervous System Agents, Central Nervous System Stimulants, Dopamine Agents, Dopamine Uptake Inhibitors, Peripheral Nervous System Agents, Neurotransmitter Agents, Neurotransmitter Uptake Inhibitors, Sympathomimetics,	No	No
Pentobarbital	<1.00E-16	158	Adjuvants, Anesthesia, Central Nervous System Depressants, Central Nervous System Agents, GABA Agents, GABA Modulators, Hypnotics and Sedatives, Neurotransmitter Agents,	No	No
Aminolevulinic Acid	<1.00E-16	30	Dermatologic Agents, Photosensitizing Agents, Radiation-Sensitizing Agents,	Yes	No
Ofloxacin	<1.00E-16	152	Anti-Infective Agents, Anti-Bacterial Agents, Anti-Infective Agents, Urinary, Enzyme Inhibitors, Nucleic Acid Synthesis Inhibitors, Renal Agents,	No	No
Hydroxyurea	<1.00E-16	554	Antineoplastic Agents, Antisickling Agents, Enzyme Inhibitors, Nucleic Acid Synthesis Inhibitors, Hematologic Agents,	Yes	No
Cladribine	<1.00E-16	26	Antineoplastic Agents, Immunologic Factors, Immunosuppressive Agents,	No	No
Chloramphenicol	<1.00E-16	877	Anti-Bacterial Agents, Anti-Infective Agents, Enzyme Inhibitors, Protein Synthesis Inhibitors,	No	No
Prazosin	<1.00E-16	75	Adrenergic Agents, Adrenergic alpha-Antagonists, Adrenergic Antagonists, Antihypertensive Agents, Cardiovascular Agents, Neurotransmitter Agents,	No	No
Mycophenolate Mofetil	<1.00E-16	24	Immunologic Factors, Immunosuppressive Agents,	No	No
Oxcarbazepine	<1.00E-16	25	Anticonvulsants, Central Nervous System Agents,	No	No
Atenolol	<1.00E-16	29	Adrenergic Agents, Adrenergic Antagonists, Adrenergic beta-Antagonists, Anti-Arrhythmia Agents, Antihypertensive Agents, Autonomic Agents, Cardiovascular Agents, Peripheral Nervous System Agents, Neurotransmitter Agents, Sympatholytics,	No	No
Salicylic Acid	<1.00E-16	68	Anti-Infective Agents, Antifungal Agents, Dermatologic Agents, Keratolytic Agents,	No	No
Aprotinin	<1.00E-16	37	Coagulants, Enzyme Inhibitors, Protease Inhibitors, Hematologic Agents, Hemostatics, Serine Proteinase Inhibitors, Trypsin Inhibitors,	Yes	No
Pyrilamine	<1.00E-16	14	Anti-Allergic Agents, Histamine Agents, Histamine Antagonists, Histamine H1 Antagonists, Neurotransmitter Agents,	No	No
Ketoconazole	<1.00E-16	38	Anti-Infective Agents, Antifungal Agents,	Yes	No
Infliximab	<1.00E-16	24	Anti-Inflammatory Agents, Antirheumatic Agents, Dermatologic Agents, Gastrointestinal Agents,	No	No
Ampicillin	<1.00E-16	211	Anti-Bacterial Agents, Anti-Infective Agents,	No	No
Amifostine	<1.00E-16	25	Protective Agents, Radiation-Protective Agents,	Yes	No
Adrenocorticotropic Hormone	<1.00E-16	171	Hormones, Hormones, Hormone Substitutes, and Hormone Antagonists,	Yes	No
Melphalan	<1.00E-16	167	Alkylating Agents, Antineoplastic Agents, Alkylating, Antineoplastic Agents, Noxae, Myeloablative Agonists, Immunologic Factors, Immunosuppressive Agents,	Yes	No
Immunoglobulin E	<1.00E-16	96	Immunologic Factors,	Yes	No
Thioguanine	<1.00E-16	99	Antimetabolites, Antimetabolites, Antineoplastic, Antineoplastic Agents, Noxae,	Yes	No
Substance P	<1.00E-16	80	Neurotransmitter Agents,	Yes	No
Clonidine	1.66e-16	56	Adrenergic Agonists, Adrenergic alpha-Agonists, Adrenergic Agents, Analgesics, Antihypertensive Agents, Autonomic Agents, Cardiovascular Agents, Central Nervous System Agents, Peripheral Nervous System Agents, Neurotransmitter Agents, Sympatholytics, Sensory System Agents,	Yes	No
Leucovorin	1.71e-16	53	Micronutrients, Growth Substances, Vitamin B Complex, Vitamins,	Yes	No
Cyproterone	1.81e-16	32	Androgen Antagonists, Hormone Antagonists, Hormones, Hormone Substitutes, and Hormone Antagonists,	Yes	No
Zidovudine	2.56e-16	66	Anti-HIV Agents, Anti-Infective Agents, Anti-Retroviral Agents, Antimetabolites, Antiviral Agents, Enzyme Inhibitors, Noxae, Nucleic Acid Synthesis Inhibitors, Reverse Transcriptase Inhibitors,	Yes	No
Gramicidin	3.88e-16	49	Anti-Bacterial Agents, Anti-Infective Agents, Anti-Infective Agents, Local,	No	No
Tacrolimus	4.35e-16	137	Immunologic Factors, Immunosuppressive Agents,	No	No
Antigen-Antibody Complex	4.65e-16	107	Immunologic Factors,	Yes	No
Mycophenolic Acid	5.06e-16	23	Antibiotics, Antineoplastic, Antineoplastic Agents, Enzyme Inhibitors,	Yes	No
Cobalt	5.61e-16	169	Micronutrients, Growth Substances, Trace Elements,	Yes	No
Bradykinin	5.67e-16	92	Cardiovascular Agents, Vasodilator Agents,	Yes	No
Atorvastatin	6.22e-16	37	Anticholesteremic Agents, Antilipemic Agents, Antimetabolites, Enzyme Inhibitors, Hydroxymethylglutaryl-CoA Reductase Inhibitors,	No	No
Bromocriptine	6.89e-16	33	Anti-Dyskinesia Agents, Antiparkinson Agents, Central Nervous System Agents, Dopamine Agents, Dopamine Agonists, Neurotransmitter Agents, Hormone Antagonists, Hormones, Hormone Substitutes, and Hormone Antagonists,	Yes	No
Fluoxetine	8.54e-16	34	Antidepressive Agents, Antidepressive Agents, Second-Generation, Central Nervous System Agents, Neurotransmitter Agents, Neurotransmitter Uptake Inhibitors, Serotonin Agents, Serotonin Uptake Inhibitors, Psychotropic Drugs,	No	No
Luciferases	1.17e-15	2329	Luminescent Agents, Indicators and Reagents,	Yes	No
Penicillamine	1.24e-15	74	Antidotes, Antirheumatic Agents, Chelating Agents, Protective Agents,	Yes	No
Interferons	1.28e-15	365	Anti-Infective Agents, Antineoplastic Agents, Antiviral Agents,	Yes	No
Polymyxin B	1.33e-15	34	Anti-Infective Agents, Anti-Bacterial Agents,	No	No
Allopurinol	1.35e-15	29	Antimetabolites, Antioxidants, Antirheumatic Agents, Enzyme Inhibitors, Free Radical Scavengers, Noxae, Gout Suppressants,	Yes	No
Ethanol	1.37e-15	892	Anti-Infective Agents, Anti-Infective Agents, Local, Central Nervous System Agents, Central Nervous System Depressants, Solvents,	Yes	No
Immunoglobulin M	1.62e-15	439	Immunologic Factors,	Yes	No
Vasoactive Intestinal Peptide	2.28e-15	40	Cardiovascular Agents, Central Nervous System Agents, Protective Agents, Neuroprotective Agents, Gastrointestinal Agents, Vasodilator Agents,	Yes	No
Metoprolol	3.32e-15	23	Adrenergic Agents, Adrenergic Antagonists, Adrenergic beta-Antagonists, Anti-Arrhythmia Agents, Antihypertensive Agents, Autonomic Agents, Cardiovascular Agents, Peripheral Nervous System Agents, Neurotransmitter Agents, Sympatholytics,	No	No
Omeprazole	4.17e-15	59	Anti-Ulcer Agents, Enzyme Inhibitors, Gastrointestinal Agents,	Yes	No
Captopril	4.23e-15	69	Angiotensin-Converting Enzyme Inhibitors, Antihypertensive Agents, Cardiovascular Agents, Enzyme Inhibitors, Protease Inhibitors,	Yes	No
Hydrochlorothiazide	5.07e-15	22	Antihypertensive Agents, Cardiovascular Agents, Diuretics, Membrane Transport Modulators, Natriuretic Agents, Sodium Chloride Symporter Inhibitors,	No	No
Ascorbic Acid	6.71e-15	259	Antioxidants, Protective Agents, Micronutrients, Growth Substances, Vitamins,	Yes	No
Hyaluronic Acid	1.47e-14	42	Adjuvants, Immunologic, Immunologic Factors,	Yes	No
Bosentan	1.56e-14	13	Antihypertensive Agents, Cardiovascular Agents,	No	No
Phytohemagglutinins	1.99e-14	112	Mitogens, Mitosis Modulators,	Yes	No
Apomorphine	2.8e-14	42	Anti-Dyskinesia Agents, Antiparkinson Agents, Central Nervous System Agents, Dopamine Agents, Dopamine Agonists, Neurotransmitter Agents,	No	No
Methylene Blue	2.98e-14	50	Enzyme Inhibitors,	Yes	No
Butylated Hydroxyanisole	4.66e-14	80	Antioxidants, Carcinogens, Noxae, Protective Agents,	Yes	No
Fludarabine	5.5e-14	104	Antineoplastic Agents,	No	No
Etodolac	6.1e-14	23	Analgesics, Analgesics, Non-Narcotic, Anti-Inflammatory Agents, Anti-Inflammatory Agents, Non-Steroidal, Antirheumatic Agents, Cyclooxygenase Inhibitors, Enzyme Inhibitors, Peripheral Nervous System Agents, Sensory System Agents,	No	No
Candesartan	7.32e-14	14	Angiotensin II Type 1 Receptor Blockers, Antihypertensive Agents, Cardiovascular Agents,	No	No
Dicumarol	7.73e-14	147	Anticoagulants, Enzyme Inhibitors, Hematologic Agents, Uncoupling Agents,	Yes	No
Immunoglobulin A	7.73e-14	128	Immunologic Factors,	Yes	No
Folic Acid	8.37e-14	79	Micronutrients, Growth Substances, Hematinics, Hematologic Agents, Vitamin B Complex, Vitamins,	Yes	No
Terbutaline	8.88e-14	18	Adrenergic Agents, Adrenergic Agonists, Adrenergic beta-Agonists, Anti-Asthmatic Agents, Autonomic Agents, Bronchodilator Agents, Peripheral Nervous System Agents, Neurotransmitter Agents, Sympathomimetics, Tocolytic Agents, Reproductive Control Agents, Respiratory System Agents,	No	No
6-Mercaptopurine	9.05e-14	23	Antimetabolites, Antimetabolites, Antineoplastic, Antineoplastic Agents, Enzyme Inhibitors, Noxae, Nucleic Acid Synthesis Inhibitors, Immunologic Factors, Immunosuppressive Agents,	No	No
Erythromycin	1.14e-13	122	Anti-Bacterial Agents, Anti-Infective Agents, Enzyme Inhibitors, Gastrointestinal Agents, Protein Synthesis Inhibitors,	No	No
Streptokinase	1.16e-13	24	Cardiovascular Agents, Fibrinolytic Agents, Fibrin Modulating Agents, Hematologic Agents,	No	No
Plasminogen Activator Inhibitor 1	1.34e-13	239	Enzyme Inhibitors, Protease Inhibitors, Serine Proteinase Inhibitors,	Yes	No
Gatifloxacin	1.35e-13	79	Anti-Infective Agents,	No	No
Sulfamethoxazole	1.45e-13	46	Anti-Infective Agents,	No	No
Meloxicam	1.7e-13	52	Analgesics, Analgesics, Non-Narcotic, Anti-Inflammatory Agents, Non-Steroidal, Anti-Inflammatory Agents, Antirheumatic Agents, Cyclooxygenase Inhibitors, Enzyme Inhibitors, Peripheral Nervous System Agents, Sensory System Agents,	No	No
Trimethoprim	1.92e-13	63	Anti-Infective Agents, Anti-Infective Agents, Urinary, Antimalarials, Antiparasitic Agents, Antiprotozoal Agents, Enzyme Inhibitors, Folic Acid Antagonists, Renal Agents,	No	No
Sparfloxacin	2.17e-13	72	Anti-Bacterial Agents, Anti-Infective Agents, Antitubercular Agents,	No	No
Thapsigargin	3e-13	95	Enzyme Inhibitors,	Yes	No
Methamphetamine	3.44e-13	79	Adrenergic Agents, Adrenergic Uptake Inhibitors, Autonomic Agents, Central Nervous System Agents, Central Nervous System Stimulants, Dopamine Agents, Dopamine Uptake Inhibitors, Peripheral Nervous System Agents, Neurotransmitter Agents, Neurotransmitter Uptake Inhibitors, Sympathomimetics,	No	No
Thrombin	3.89e-13	615	Coagulants, Hematologic Agents, Hemostatics,	Yes	No
Cidofovir	3.89e-13	36	Anti-Infective Agents, Anti-HIV Agents, Anti-Retroviral Agents, Antineoplastic Agents, Antiviral Agents, Radiation-Sensitizing Agents,	No	No
Beta Carotene	4.07e-13	67	Micronutrients, Growth Substances, Vitamins,	Yes	No
Fluvastatin	4.81e-13	18	Anticholesteremic Agents, Antilipemic Agents, Antimetabolites, Enzyme Inhibitors, Hydroxymethylglutaryl-CoA Reductase Inhibitors,	No	No
Amino Acid Chloromethyl Ketones	4.94e-13	468	Alkylating Agents, Enzyme Inhibitors, Noxae, Protein Synthesis Inhibitors, Protease Inhibitors, Serine Proteinase Inhibitors,	Yes	No
Calcitonin	5.35e-13	28	Bone Density Conservation Agents,	Yes	No
Diphenhydramine	5.58e-13	12	Anesthetics, Anesthetics, Local, Anti-Allergic Agents, Antiemetics, Autonomic Agents, Central Nervous System Agents, Central Nervous System Depressants, Gastrointestinal Agents, Hypnotics and Sedatives, Peripheral Nervous System Agents, Histamine Agents, Neurotransmitter Agents, Histamine Antagonists, Histamine H1 Antagonists, Sensory System Agents,	No	No
Deferoxamine	6.25e-13	189	Chelating Agents, Iron Chelating Agents, Siderophores,	Yes	No
Lamivudine	6.68e-13	23	Anti-Infective Agents, Anti-HIV Agents, Anti-Retroviral Agents, Antiviral Agents, Enzyme Inhibitors, Nucleic Acid Synthesis Inhibitors, Reverse Transcriptase Inhibitors,	No	No
Topotecan	7.96e-13	202	Antineoplastic Agents, Enzyme Inhibitors,	Yes	No
Procaine	9.95e-13	19	Anesthetics, Anesthetics, Local, Central Nervous System Depressants, Central Nervous System Agents, Peripheral Nervous System Agents, Sensory System Agents,	No	No
Vinorelbine	1.38e-12	41	Antineoplastic Agents, Antineoplastic Agents, Phytogenic,	No	No
Gefitinib	2.11e-12	101	Antineoplastic Agents, Enzyme Inhibitors, Protein Kinase Inhibitors,	No	No
Streptozocin	2.25e-12	37	Antibiotics, Antineoplastic, Antineoplastic Agents,	Yes	No
Letrozole	2.29e-12	18	Antineoplastic Agents, Aromatase Inhibitors, Enzyme Inhibitors,	No	No
Rifampin	4.14e-12	59	Anti-Bacterial Agents, Anti-Infective Agents, Antibiotics, Antitubercular, Antitubercular Agents, Enzyme Inhibitors, Nucleic Acid Synthesis Inhibitors, Leprostatic Agents,	No	No
Valdecoxib	4.34e-12	32	Analgesics, Analgesics, Non-Narcotic, Anti-Inflammatory Agents, Anti-Inflammatory Agents, Non-Steroidal, Antirheumatic Agents, Cyclooxygenase Inhibitors, Enzyme Inhibitors, Peripheral Nervous System Agents, Sensory System Agents,	No	No
Sildenafil	5.1e-12	20	Cardiovascular Agents, Enzyme Inhibitors, Phosphodiesterase Inhibitors, Vasodilator Agents,	No	No
1-Methyl-4-Phenylpyridinium	5.37e-12	19	Herbicides, Pesticides,	No	No
Diltiazem	5.43e-12	41	Antihypertensive Agents, Cardiovascular Agents, Calcium Channel Blockers, Membrane Transport Modulators, Vasodilator Agents,	Yes	No
N-Methylaspartate	5.75e-12	94	Excitatory Amino Acid Agents, Excitatory Amino Acid Agonists, Neurotransmitter Agents,	No	No
Dextromethorphan	6.34e-12	11	Antitussive Agents, Central Nervous System Agents, Excitatory Amino Acid Agents, Excitatory Amino Acid Antagonists, Neurotransmitter Agents, Respiratory System Agents,	No	No
Sulpiride	6.52e-12	13	Antidepressive Agents, Antidepressive Agents, Second-Generation, Antipsychotic Agents, Central Nervous System Depressants, Central Nervous System Agents, Dopamine Agents, Dopamine Antagonists, Neurotransmitter Agents, Tranquilizing Agents, Psychotropic Drugs,	No	No
Cefotaxime	7.48e-12	129	Anti-Bacterial Agents, Anti-Infective Agents,	No	No
Ranitidine	8.53e-12	12	Anti-Ulcer Agents, Gastrointestinal Agents, Histamine Agents, Histamine Antagonists, Histamine H2 Antagonists, Neurotransmitter Agents,	Yes	No
Baclofen	1.16e-11	33	Central Nervous System Agents, GABA Agents, GABA Agonists, Muscle Relaxants, Central, Peripheral Nervous System Agents, Neuromuscular Agents, Neurotransmitter Agents,	No	No
Amphotericin B	1.2e-11	31	Amebicides, Anti-Bacterial Agents, Anti-Infective Agents, Antifungal Agents, Antiparasitic Agents, Antiprotozoal Agents,	No	No
Calcimycin	1.25e-11	70	Anti-Bacterial Agents, Anti-Infective Agents, Membrane Transport Modulators, Ionophores,	Yes	No
Metoclopramide	1.32e-11	13	Antiemetics, Autonomic Agents, Central Nervous System Agents, Dopamine Agents, Dopamine Antagonists, Gastrointestinal Agents, Peripheral Nervous System Agents, Neurotransmitter Agents,	Yes	No
Manganese	1.86e-11	112	Micronutrients, Growth Substances, Trace Elements,	Yes	No
Sulfasalazine	3.16e-11	30	Analgesics, Analgesics, Non-Narcotic, Anti-Inflammatory Agents, Non-Steroidal, Anti-Infective Agents, Anti-Inflammatory Agents, Antirheumatic Agents, Peripheral Nervous System Agents, Gastrointestinal Agents, Sensory System Agents,	Yes	No
Fluorodeoxyglucose F18	4.87e-11	24	Indicators and Reagents, Radiopharmaceuticals,	Yes	No
Butylated Hydroxytoluene	5.24e-11	64	Antioxidants, Protective Agents,	No	No
Norfloxacin	5.61e-11	80	Anti-Infective Agents, Anti-Bacterial Agents, Enzyme Inhibitors, Nucleic Acid Synthesis Inhibitors,	No	No
Dipyridamole	6.8e-11	39	Cardiovascular Agents, Enzyme Inhibitors, Hematologic Agents, Phosphodiesterase Inhibitors, Platelet Aggregation Inhibitors, Vasodilator Agents,	Yes	No
Mitoxantrone	8.7e-11	136	Analgesics, Antineoplastic Agents, Central Nervous System Agents, Peripheral Nervous System Agents, Sensory System Agents,	Yes	No
Oxaliplatin	1.01e-10	82	Antineoplastic Agents,	No	No
Ifosfamide	1.1e-10	38	Alkylating Agents, Antineoplastic Agents, Antineoplastic Agents, Alkylating, Noxae,	Yes	No
Levodopa	1.11e-10	40	Anti-Dyskinesia Agents, Antiparkinson Agents, Central Nervous System Agents, Dopamine Agents, Neurotransmitter Agents,	Yes	No
Didanosine	1.29e-10	11	Anti-Infective Agents, Anti-HIV Agents, Anti-Retroviral Agents, Antimetabolites, Antiviral Agents, Enzyme Inhibitors, Noxae, Nucleic Acid Synthesis Inhibitors, Reverse Transcriptase Inhibitors,	No	No
Arginine Vasopressin	1.31e-10	49	Antidiuretic Agents, Cardiovascular Agents, Coagulants, Natriuretic Agents, Hematologic Agents, Hemostatics, Vasoconstrictor Agents,	Yes	No
Paclitaxel	1.58e-10	892	Antimitotic Agents, Antineoplastic Agents, Phytogenic, Antineoplastic Agents, Mitosis Modulators, Tubulin Modulators,	Yes	No
Insulin	1.62e-10	4567	Hypoglycemic Agents,	Yes	No
Diazoxide	1.91e-10	27	Antihypertensive Agents, Cardiovascular Agents, Vasodilator Agents,	Yes	No
Immunoglobulin Fab Fragments	2.27e-10	49	Immunologic Factors,	Yes	No
Olanzapine	2.99e-10	24	Antiemetics, Autonomic Agents, Antipsychotic Agents, Central Nervous System Agents, Central Nervous System Depressants, Gastrointestinal Agents, Peripheral Nervous System Agents, Neurotransmitter Agents, Neurotransmitter Uptake Inhibitors, Serotonin Agents, Serotonin Uptake Inhibitors, Tranquilizing Agents, Psychotropic Drugs,	No	No
Lisinopril	3.03e-10	12	Angiotensin-Converting Enzyme Inhibitors, Antihypertensive Agents, Cardiotonic Agents, Cardiovascular Agents, Enzyme Inhibitors, Protease Inhibitors, Protective Agents,	No	No
Alpha 1-Antitrypsin	3.14e-10	103	Enzyme Inhibitors, Protease Inhibitors, Serine Proteinase Inhibitors, Trypsin Inhibitors,	Yes	No
Tetrachlorodibenzodioxin	3.33e-10	65	Environmental Pollutants, Noxae, Teratogens,	No	No
Endothelial Growth Factors	3.89e-10	432	Growth Substances,	Yes	No
Codeine	4.23e-10	13	Analgesics, Analgesics, Opioid, Antitussive Agents, Central Nervous System Agents, Central Nervous System Depressants, Narcotics, Peripheral Nervous System Agents, Respiratory System Agents, Sensory System Agents,	No	No
Interferon-Beta	4.58e-10	174	Anti-Infective Agents, Antineoplastic Agents, Antiviral Agents, Immunologic Factors,	Yes	No
Daunorubicin	5.25e-10	244	Antibiotics, Antineoplastic, Antineoplastic Agents,	Yes	No
Azathioprine	6.95e-10	35	Antimetabolites, Antimetabolites, Antineoplastic, Antineoplastic Agents, Antirheumatic Agents, Noxae, Immunologic Factors, Immunosuppressive Agents,	Yes	No
Neomycin	6.95e-10	177	Anti-Infective Agents, Anti-Bacterial Agents, Enzyme Inhibitors, Protein Synthesis Inhibitors,	Yes	No
Immune Sera	7.11e-10	290	Immunologic Factors,	Yes	No
Glycine	7.53e-10	195	Neurotransmitter Agents, Glycine Agents,	Yes	No
Phenytoin	8.59e-10	102	Anticonvulsants, Central Nervous System Agents,	Yes	No
Cetuximab	1.18e-09	24	Antineoplastic Agents,	No	No
Melatonin	1.25e-09	51	Antioxidants, Central Nervous System Agents, Central Nervous System Depressants, Protective Agents,	Yes	No
Dinoprost	1.25e-09	54	Abortifacient Agents, Abortifacient Agents, Nonsteroidal, Oxytocics, Reproductive Control Agents,	No	No
Pentoxifylline	1.25e-09	37	Antioxidants, Cardiovascular Agents, Enzyme Inhibitors, Free Radical Scavengers, Protective Agents, Hematologic Agents, Phosphodiesterase Inhibitors, Platelet Aggregation Inhibitors, Radiation-Protective Agents, Vasodilator Agents,	No	No
Thiotepa	1.34e-09	23	Alkylating Agents, Antineoplastic Agents, Antineoplastic Agents, Alkylating, Noxae, Myeloablative Agonists, Immunologic Factors, Immunosuppressive Agents,	Yes	No
Aclarubicin	1.38e-09	17	Antibiotics, Antineoplastic, Antineoplastic Agents,	Yes	No
Tissue Plasminogen Activator	1.55e-09	58	Cardiovascular Agents, Fibrinolytic Agents, Fibrin Modulating Agents, Hematologic Agents,	Yes	No
Ondansetron	1.74e-09	12	Anti-Anxiety Agents, Antiemetics, Autonomic Agents, Antipruritics, Antipsychotic Agents, Central Nervous System Agents, Central Nervous System Depressants, Dermatologic Agents, Gastrointestinal Agents, Peripheral Nervous System Agents, Neurotransmitter Agents, Serotonin Agents, Serotonin Antagonists, Tranquilizing Agents, Psychotropic Drugs,	Yes	No
Lapatinib	1.76e-09	14	Antineoplastic Agents, Enzyme Inhibitors, Protein Kinase Inhibitors,	No	No
Bupivacaine	2.16e-09	32	Anesthetics, Anesthetics, Local, Central Nervous System Agents, Central Nervous System Depressants, Peripheral Nervous System Agents, Sensory System Agents,	Yes	No
Bromodeoxyuridine	2.23e-09	506	Anti-Infective Agents, Antimetabolites, Antimetabolites, Antineoplastic, Antineoplastic Agents, Antiviral Agents, Noxae, Radiation-Sensitizing Agents,	Yes	No
Piperazine	2.24e-09	57	Anthelmintics, Anti-Infective Agents, Antinematodal Agents, Antiparasitic Agents,	No	No
Fluticasone	2.3e-09	22	Anti-Allergic Agents, Anti-Asthmatic Agents, Anti-Inflammatory Agents, Autonomic Agents, Bronchodilator Agents, Dermatologic Agents, Peripheral Nervous System Agents, Respiratory System Agents,	No	No
Secretin	2.37e-09	66	Gastrointestinal Agents, Hormones, Hormone Substitutes, and Hormone Antagonists, Hormones,	Yes	No
Warfarin	2.39e-09	58	Anticoagulants, Hematologic Agents, Pesticides, Rodenticides,	Yes	No
Citalopram	2.48e-09	18	Antidepressive Agents, Antidepressive Agents, Second-Generation, Central Nervous System Agents, Neurotransmitter Agents, Neurotransmitter Uptake Inhibitors, Serotonin Agents, Serotonin Uptake Inhibitors, Psychotropic Drugs,	No	No
Beclomethasone	2.52e-09	10	Adrenal Cortex Hormones, Anti-Asthmatic Agents, Anti-Inflammatory Agents, Hormones, Hormones, Hormone Substitutes, and Hormone Antagonists, Glucocorticoids, Respiratory System Agents,	No	No
Tiagabine	2.83e-09	32	Anticonvulsants, Central Nervous System Agents, GABA Agents, GABA Agonists, Neurotransmitter Agents, Neurotransmitter Uptake Inhibitors,	No	No
Nickel	2.85e-09	74	Micronutrients, Growth Substances, Trace Elements,	Yes	No
Chlordiazepoxide	2.95e-09	9	Adjuvants, Anesthesia, Anti-Anxiety Agents, Central Nervous System Agents, Central Nervous System Depressants, GABA Agents, GABA Modulators, Hypnotics and Sedatives, Neurotransmitter Agents, Tranquilizing Agents, Psychotropic Drugs,	No	No
Risperidone	3.03e-09	15	Antipsychotic Agents, Central Nervous System Depressants, Central Nervous System Agents, Dopamine Agents, Dopamine Antagonists, Neurotransmitter Agents, Serotonin Agents, Serotonin Antagonists, Tranquilizing Agents, Psychotropic Drugs,	No	No
Cholecystokinin	3.9e-09	61	Cholagogues and Choleretics, Gastrointestinal Agents,	Yes	No
Immunoconjugates	4.38e-09	26	Immunologic Factors,	Yes	No
Mannitol	4.89e-09	157	Diuretics, Diuretics, Osmotic, Flavoring Agents, Food Additives, Natriuretic Agents, Sweetening Agents,	Yes	No
Plasminogen	5.28e-09	26	Cardiovascular Agents, Fibrinolytic Agents, Fibrin Modulating Agents, Hematologic Agents,	Yes	No
Paroxetine	5.77e-09	13	Antidepressive Agents, Antidepressive Agents, Second-Generation, Central Nervous System Agents, Neurotransmitter Agents, Neurotransmitter Uptake Inhibitors, Serotonin Agents, Serotonin Uptake Inhibitors, Psychotropic Drugs,	No	No
Dizocilpine Maleate	6.07e-09	74	Central Nervous System Agents, Excitatory Amino Acid Agents, Excitatory Amino Acid Antagonists, Protective Agents, Neuroprotective Agents, Neurotransmitter Agents,	No	No
Polyethylene Glycols	6.46e-09	155	Drug Carriers, Solvents, Surface-Active Agents,	Yes	No
Irbesartan	6.97e-09	18	Angiotensin II Type 1 Receptor Blockers, Antihypertensive Agents, Cardiovascular Agents,	No	No
Antithrombin Iii	7.73e-09	127	Anticoagulants, Enzyme Inhibitors, Protease Inhibitors, Hematologic Agents, Serine Proteinase Inhibitors,	Yes	No
Ionomycin	1e-08	116	Membrane Transport Modulators, Ionophores,	Yes	No
Theophylline	1.02e-08	94	Anti-Asthmatic Agents, Autonomic Agents, Bronchodilator Agents, Cardiovascular Agents, Enzyme Inhibitors, Peripheral Nervous System Agents, Phosphodiesterase Inhibitors, Vasodilator Agents, Respiratory System Agents,	Yes	No
Edetic Acid	1.17e-08	77	Anticoagulants, Chelating Agents, Food Additives, Hematologic Agents,	Yes	No
Cyclin-Dependent Kinase Inhibitor P57	1.38e-08	166	Enzyme Inhibitors, Protein Kinase Inhibitors,	Yes	No
Sirolimus	1.52e-08	423	Anti-Bacterial Agents, Anti-Infective Agents, Antibiotics, Antineoplastic, Antifungal Agents, Antineoplastic Agents, Immunologic Factors, Immunosuppressive Agents,	Yes	No
Propidium	1.6e-08	45	Coloring Agents, Indicators and Reagents, Intercalating Agents,	Yes	No
Thromboplastin	1.65e-08	104	Coagulants, Hematologic Agents, Hemostatics,	Yes	No
Epirubicin	1.84e-08	109	Antibiotics, Antineoplastic, Antineoplastic Agents,	Yes	No
Superoxides	2.45e-08	261	Noxae, Oxidants,	Yes	No
Kainic Acid	2.64e-08	96	Anthelmintics, Anti-Infective Agents, Antinematodal Agents, Antiparasitic Agents, Excitatory Amino Acid Agents, Excitatory Amino Acid Agonists, Neurotransmitter Agents,	No	No
Etoposide	2.8e-08	1402	Antineoplastic Agents, Antineoplastic Agents, Phytogenic,	Yes	No
Oxacillin	2.87e-08	54	Anti-Infective Agents, Anti-Bacterial Agents,	No	No
Oxytetracycline	3e-08	9	Anti-Infective Agents, Anti-Bacterial Agents,	No	No
Propylene Glycol	3.18e-08	19	Pharmaceutic Aids, Solvents, Vehicles,	No	No
Anastrozole	3.49e-08	14	Antineoplastic Agents, Antineoplastic Agents, Hormonal, Aromatase Inhibitors, Enzyme Inhibitors,	No	No
Nitroprusside	4.14e-08	218	Antihypertensive Agents, Cardiovascular Agents, Indicators and Reagents, Nitric Oxide Donors, Vasodilator Agents,	Yes	No
Clomiphene	4.19e-08	15	Estrogen Receptor Modulators, Estrogen Antagonists, Fertility Agents, Fertility Agents, Female, Hormone Antagonists, Hormones, Hormone Substitutes, and Hormone Antagonists, Reproductive Control Agents, Selective Estrogen Receptor Modulators,	No	No
Durapatite	4.36e-08	52	Biocompatible Materials,	No	No
Terodiline	4.5e-08	6	Autonomic Agents, Calcium Channel Blockers, Cardiovascular Agents, Membrane Transport Modulators, Parasympatholytics, Peripheral Nervous System Agents,	No	No
Riboflavin	4.58e-08	56	Dermatologic Agents, Micronutrients, Growth Substances, Photosensitizing Agents, Radiation-Sensitizing Agents, Vitamin B Complex, Vitamins,	No	No
Rabeprazole	4.64e-08	9	Anti-Ulcer Agents, Enzyme Inhibitors, Gastrointestinal Agents,	No	No
Stavudine	5.09e-08	13	Anti-HIV Agents, Anti-Infective Agents, Anti-Retroviral Agents, Antimetabolites, Antiviral Agents, Enzyme Inhibitors, Noxae, Nucleic Acid Synthesis Inhibitors, Reverse Transcriptase Inhibitors,	No	No
Propylthiouracil	5.42e-08	24	Antimetabolites, Antithyroid Agents, Hormones, Hormone Substitutes, and Hormone Antagonists, Noxae, Hormone Antagonists,	No	No
Bombesin	5.82e-08	56	Neurotransmitter Agents,	Yes	No
Mechlorethamine	5.82e-08	33	Alkylating Agents, Antineoplastic Agents, Alkylating, Antineoplastic Agents, Chemical Warfare Agents, Noxae, Irritants, Poisons, Riot Control Agents, Chemical,	Yes	No
Dibucaine	6.04e-08	13	Anesthetics, Anesthetics, Local, Central Nervous System Agents, Central Nervous System Depressants, Peripheral Nervous System Agents, Sensory System Agents,	No	No
Chlorambucil	6.09e-08	74	Alkylating Agents, Antineoplastic Agents, Antineoplastic Agents, Alkylating, Noxae,	No	No
Amikacin	7.4e-08	22	Anti-Bacterial Agents, Anti-Infective Agents,	No	No
Salmeterol	8.27e-08	10	Adrenergic Agents, Adrenergic Agonists, Adrenergic beta-Agonists, Anti-Asthmatic Agents, Autonomic Agents, Bronchodilator Agents, Peripheral Nervous System Agents, Neurotransmitter Agents, Respiratory System Agents,	No	No
Cycloheximide	8.79e-08	936	Anti-Infective Agents, Antifungal Agents, Antibiotics, Antifungal, Enzyme Inhibitors, Protein Synthesis Inhibitors,	Yes	No
Valproic Acid	8.82e-08	115	Anticonvulsants, Antimanic Agents, Central Nervous System Depressants, Central Nervous System Agents, Enzyme Inhibitors, GABA Agents, Neurotransmitter Agents, Tranquilizing Agents, Psychotropic Drugs,	Yes	No
Tetrabenazine	1.21e-07	7	Adrenergic Agents, Adrenergic Uptake Inhibitors, Neurotransmitter Agents, Neurotransmitter Uptake Inhibitors,	No	No
Furosemide	1.28e-07	59	Diuretics, Membrane Transport Modulators, Natriuretic Agents, Sodium Potassium Chloride Symporter Inhibitors,	No	No
Cholera Toxin	1.32e-07	39	Adjuvants, Immunologic, Noxae, Immunologic Factors, Poisons,	Yes	No
Vidarabine	1.34e-07	32	Anti-Infective Agents, Antimetabolites, Antiviral Agents, Noxae,	No	No
Isoniazid	1.36e-07	24	Anti-Bacterial Agents, Anti-Infective Agents, Antilipemic Agents, Antimetabolites, Antitubercular Agents, Fatty Acid Synthesis Inhibitors,	No	No
Concanavalin A	1.47e-07	87	Mitogens, Mitosis Modulators,	Yes	No
Pamidronate	1.47e-07	15	Bone Density Conservation Agents,	No	No
Hydrogen Peroxide	1.55e-07	1429	Anti-Infective Agents, Anti-Infective Agents, Local, Noxae, Oxidants,	Yes	No
Interferon Alfa-2B	1.61e-07	34	Angiogenesis Inhibitors, Angiogenesis Modulating Agents, Anti-Infective Agents, Antineoplastic Agents, Antiviral Agents, Growth Substances, Growth Inhibitors,	Yes	No
Mecamylamine	1.62e-07	20	Antihypertensive Agents, Autonomic Agents, Cardiovascular Agents, Cholinergic Agents, Cholinergic Antagonists, Ganglionic Blockers, Peripheral Nervous System Agents, Neurotransmitter Agents, Nicotinic Antagonists,	No	No
Genistein	1.73e-07	258	Anticarcinogenic Agents, Antineoplastic Agents, Estrogens, Estrogens, Non-Steroidal, Enzyme Inhibitors, Protective Agents, Protein Kinase Inhibitors, Hormones, Phytoestrogens, Hormones, Hormone Substitutes, and Hormone Antagonists,	Yes	No
Diclofenac	2.23e-07	113	Analgesics, Analgesics, Non-Narcotic, Anti-Inflammatory Agents, Anti-Inflammatory Agents, Non-Steroidal, Antirheumatic Agents, Cyclooxygenase Inhibitors, Enzyme Inhibitors, Peripheral Nervous System Agents, Sensory System Agents,	No	No
Kaolin	2.34e-07	12	Antidiarrheals, Gastrointestinal Agents,	No	No
Verteporfin	2.46e-07	10	Dermatologic Agents, Photosensitizing Agents, Radiation-Sensitizing Agents,	No	No
Cortisone	2.5e-07	49	Anti-Inflammatory Agents,	Yes	No
Molybdenum	2.52e-07	90	Micronutrients, Growth Substances, Trace Elements,	No	No
Cyclophosphamide	2.57e-07	683	Alkylating Agents, Antineoplastic Agents, Antineoplastic Agents, Alkylating, Antirheumatic Agents, Noxae, Immunologic Factors, Mutagens, Myeloablative Agonists, Immunosuppressive Agents,	Yes	No
Polychlorinated Biphenyls	2.65e-07	45	Environmental Pollutants,	Yes	No
Cholecalciferol	3.13e-07	50	Bone Density Conservation Agents, Micronutrients, Growth Substances, Vitamins,	No	No
Antipyrine	3.15e-07	61	Analgesics, Analgesics, Non-Narcotic, Anti-Inflammatory Agents, Anti-Inflammatory Agents, Non-Steroidal, Antirheumatic Agents, Peripheral Nervous System Agents, Sensory System Agents,	Yes	No
Iohexol	3.15e-07	12	Contrast Media,	Yes	No
Finasteride	3.22e-07	18	Enzyme Inhibitors,	No	No
Isosorbide	3.67e-07	12	Diuretics, Diuretics, Osmotic, Natriuretic Agents,	No	No
Cefoxitin	3.98e-07	39	Anti-Bacterial Agents, Anti-Infective Agents,	No	No
Triamcinolone Acetonide	4.17e-07	54	Adrenal Cortex Hormones, Anti-Inflammatory Agents, Hormones, Hormone Substitutes, and Hormone Antagonists, Immunologic Factors, Immunosuppressive Agents, Hormones, Glucocorticoids,	No	No
Fluorides	4.23e-07	48	Cariostatic Agents, Protective Agents,	Yes	No
Imipenem	4.37e-07	104	Anti-Bacterial Agents, Anti-Infective Agents,	No	No
Imipramine	4.71e-07	40	Adrenergic Agents, Adrenergic Uptake Inhibitors, Antidepressive Agents, Antidepressive Agents, Tricyclic, Central Nervous System Agents, Neurotransmitter Agents, Neurotransmitter Uptake Inhibitors, Psychotropic Drugs,	No	No
Quinidine	4.75e-07	56	Adrenergic Agents, Adrenergic alpha-Antagonists, Adrenergic Antagonists, Anti-Arrhythmia Agents, Anti-Infective Agents, Antimalarials, Antiparasitic Agents, Antiprotozoal Agents, Cardiovascular Agents, Cholinergic Agents, Cholinergic Antagonists, Enzyme Inhibitors, Muscarinic Antagonists, Neurotransmitter Agents,	No	No
Muramidase	5.18e-07	48	Anti-Infective Agents,	Yes	No
Diphenyl	5.22e-07	175	Fungicides, Industrial, Pesticides,	No	No
Salmon Calcitonin	5.58e-07	7	Bone Density Conservation Agents,	No	No
Colchicine	5.98e-07	80	Antimitotic Agents, Antirheumatic Agents, Mitosis Modulators, Gout Suppressants, Tubulin Modulators,	Yes	No
Calcium Carbonate	6.38e-07	20	Antacids,	Yes	No
Deoxyglucose	6.4e-07	86	Anti-Infective Agents, Antimetabolites, Antiviral Agents, Noxae,	Yes	No
Enkephalins	6.62e-07	49	Neurotransmitter Agents,	Yes	No
Fluorescein-5-Isothiocyanate	6.96e-07	81	Coloring Agents, Fluorescent Dyes, Luminescent Agents, Indicators and Reagents,	Yes	No
Chlorpheniramine	7.12e-07	7	Anti-Allergic Agents, Antipruritics, Dermatologic Agents, Neurotransmitter Agents, Histamine Agents, Histamine Antagonists, Histamine H1 Antagonists,	No	No
Gemtuzumab	7.21e-07	9	Antineoplastic Agents,	No	No
Plicamycin	7.27e-07	70	Antibiotics, Antineoplastic, Antineoplastic Agents, Coloring Agents, Enzyme Inhibitors, Fluorescent Dyes, Luminescent Agents, Nucleic Acid Synthesis Inhibitors, Protein Synthesis Inhibitors, Indicators and Reagents,	Yes	No
Oxidopamine	7.96e-07	62	Adrenergic Agents, Autonomic Agents, Peripheral Nervous System Agents, Neurotransmitter Agents, Sympatholytics,	No	No
Carbon Monoxide	8.24e-07	25	Antimetabolites, Noxae,	No	No
Clofibrate	9.03e-07	44	Anticholesteremic Agents, Antilipemic Agents, Antimetabolites,	Yes	No
2-Acetylaminofluorene	9.16e-07	122	Carcinogens, Noxae,	No	No
Rotenone	9.78e-07	48	Enzyme Inhibitors, Pesticides, Insecticides, Uncoupling Agents,	Yes	No
Itraconazole	9.83e-07	11	Anti-Infective Agents, Antifungal Agents, Antiparasitic Agents, Antiprotozoal Agents,	No	No
Perindopril	1.01e-06	14	Angiotensin-Converting Enzyme Inhibitors, Antihypertensive Agents, Cardiovascular Agents, Enzyme Inhibitors, Protease Inhibitors,	No	No
Fentanyl	1.1e-06	81	Adjuvants, Anesthesia, Analgesics, Analgesics, Opioid, Anesthetics, Anesthetics, General, Anesthetics, Intravenous, Central Nervous System Agents, Central Nervous System Depressants, Narcotics, Peripheral Nervous System Agents, Sensory System Agents,	Yes	No
Dimethyl Sulfoxide	1.16e-06	238	Antioxidants, Cryoprotective Agents, Free Radical Scavengers, Protective Agents, Solvents,	Yes	No
Prednisolone	1.23e-06	144	Adrenal Cortex Hormones, Anti-Inflammatory Agents, Antineoplastic Agents, Hormonal, Antineoplastic Agents, Hormones, Hormone Substitutes, and Hormone Antagonists, Hormones, Glucocorticoids,	Yes	No
Immunoglobulin Heavy Chains	1.36e-06	294	Immunologic Factors,	Yes	No
Chlorzoxazone	1.36e-06	6	Central Nervous System Agents, Muscle Relaxants, Central, Neuromuscular Agents, Peripheral Nervous System Agents,	No	No
Succinylcholine	1.37e-06	12	Neuromuscular Agents, Neuromuscular Blocking Agents, Neuromuscular Depolarizing Agents, Peripheral Nervous System Agents,	No	No
Methimazole	1.37e-06	17	Antithyroid Agents, Hormones, Hormone Substitutes, and Hormone Antagonists, Hormone Antagonists,	No	No
Oncostatin M	1.61e-06	31	Antineoplastic Agents, Growth Substances, Growth Inhibitors,	No	No
Carvedilol	1.63e-06	11	Adrenergic alpha-Antagonists, Adrenergic Agents, Adrenergic Antagonists, Adrenergic beta-Antagonists, Antihypertensive Agents, Cardiovascular Agents, Neurotransmitter Agents, Vasodilator Agents,	No	No
Naltrexone	1.76e-06	15	Central Nervous System Agents, Narcotic Antagonists, Peripheral Nervous System Agents, Sensory System Agents,	Yes	No
Pituitary Adenylate Cyclase-Activating Polypeptide	1.78e-06	15	Cardiovascular Agents, Growth Substances, Neurotransmitter Agents, Vasodilator Agents,	Yes	No
Medroxyprogesterone	1.86e-06	120	Contraceptive Agents, Contraceptive Agents, Female, Contraceptives, Oral, Contraceptives, Oral, Synthetic, Reproductive Control Agents,	No	No
Felbamate	2.12e-06	20	Anticonvulsants, Central Nervous System Agents,	No	No
Cisapride	2.32e-06	9	Anti-Ulcer Agents, Gastrointestinal Agents, Neurotransmitter Agents, Serotonin Agonists, Serotonin Agents,	No	No
Hydrocortisone	2.5e-06	272	Anti-Inflammatory Agents,	Yes	No
Vasopressins	2.57e-06	42	Antidiuretic Agents, Cardiovascular Agents, Coagulants, Natriuretic Agents, Hematologic Agents, Hemostatics, Vasoconstrictor Agents,	Yes	No
Disopyramide	2.74e-06	11	Anti-Arrhythmia Agents, Cardiovascular Agents,	No	No
Calcitonin Gene-Related Peptide	2.82e-06	26	Cardiovascular Agents, Vasodilator Agents,	Yes	No
Tranexamic Acid	2.95e-06	11	Antifibrinolytic Agents, Coagulants, Fibrin Modulating Agents, Hematologic Agents, Hemostatics,	No	No
Pentamidine	3.81e-06	16	Anti-Infective Agents, Antifungal Agents, Antiparasitic Agents, Antiprotozoal Agents, Trypanocidal Agents,	No	No
Methysergide	3.81e-06	9	Cardiovascular Agents, Neurotransmitter Agents, Serotonin Agents, Serotonin Antagonists, Vasoconstrictor Agents,	No	No
Cephalothin	3.88e-06	28	Anti-Bacterial Agents, Anti-Infective Agents,	No	No
Methylprednisolone	3.99e-06	89	Adrenal Cortex Hormones, Anti-Inflammatory Agents, Antiemetics, Autonomic Agents, Central Nervous System Agents, Gastrointestinal Agents, Hormones, Hormone Substitutes, and Hormone Antagonists, Protective Agents, Neuroprotective Agents, Peripheral Nervous System Agents, Hormones, Glucocorticoids,	No	No
Interferon Type I	4.01e-06	80	Anti-Infective Agents, Antineoplastic Agents, Antiviral Agents,	Yes	No
Gastrins	4.43e-06	83	Hormones, Hormones, Hormone Substitutes, and Hormone Antagonists,	Yes	No
Estrone	4.51e-06	90	Estrogens, Hormones, Hormones, Hormone Substitutes, and Hormone Antagonists,	Yes	No
Alprazolam	4.7e-06	11	Anti-Anxiety Agents, Central Nervous System Agents, Central Nervous System Depressants, GABA Agents, GABA Modulators, Hypnotics and Sedatives, Neurotransmitter Agents, Tranquilizing Agents, Psychotropic Drugs,	No	No
Cephalosporins	4.74e-06	133	Anti-Bacterial Agents, Anti-Infective Agents,	No	No
Amlodipine	4.81e-06	16	Antihypertensive Agents, Cardiovascular Agents, Calcium Channel Blockers, Membrane Transport Modulators, Vasodilator Agents,	No	No
Riluzole	4.95e-06	23	Anticonvulsants, Central Nervous System Agents, Excitatory Amino Acid Agents, Excitatory Amino Acid Antagonists, Protective Agents, Neuroprotective Agents, Neurotransmitter Agents,	No	No
Immunoglobulin Light Chains	5.1e-06	71	Immunologic Factors,	Yes	No
Indinavir	5.36e-06	21	Anti-Infective Agents, Anti-HIV Agents, Anti-Retroviral Agents, Antiviral Agents, Enzyme Inhibitors, Protease Inhibitors, HIV Protease Inhibitors,	No	No
Egtazic Acid	5.44e-06	133	Antidotes, Chelating Agents, Protective Agents,	Yes	No
Xenon	5.45e-06	71	Anesthetics, Anesthetics, General, Anesthetics, Inhalation, Central Nervous System Depressants, Central Nervous System Agents,	Yes	No
Disulfiram	5.45e-06	27	Alcohol Deterrents, Central Nervous System Agents, Enzyme Inhibitors,	No	No
Phosphoric Acid	5.7e-06	15	Dental Materials,	No	No
Erlotinib	6.22e-06	28	Enzyme Inhibitors, Protein Kinase Inhibitors,	Yes	Yes
Bile Acids And Salts	6.27e-06	72	Gastrointestinal Agents,	Yes	No
Immunoglobulin Fragments	6.34e-06	35	Immunologic Factors,	Yes	No
Lansoprazole	6.77e-06	10	Anti-Infective Agents, Anti-Ulcer Agents, Enzyme Inhibitors, Gastrointestinal Agents,	No	No
Enalaprilat	7.28e-06	7	Angiotensin-Converting Enzyme Inhibitors, Antihypertensive Agents, Cardiovascular Agents, Enzyme Inhibitors, Protease Inhibitors,	No	No
Phenylhydrazine	7.33e-06	15	Noxae, Oxidants,	No	No
4-Butyrolactone	7.4e-06	56	Solvents,	Yes	No
Scopolamine	7.53e-06	37	Adjuvants, Anesthesia, Autonomic Agents, Cholinergic Agents, Central Nervous System Agents, Cholinergic Antagonists, Muscarinic Antagonists, Mydriatics, Peripheral Nervous System Agents, Neurotransmitter Agents,	Yes	No
Capecitabine	8.21e-06	15	Antimetabolites, Antimetabolites, Antineoplastic, Antineoplastic Agents, Noxae,	No	No
Coal Tar	8.54e-06	5	Dermatologic Agents, Keratolytic Agents,	No	No
Cantharidin	1.01e-05	30	Enzyme Inhibitors, Noxae, Irritants, Riot Control Agents, Chemical,	No	No
Phorbol Esters	1.02e-05	144	Carcinogens, Noxae,	Yes	No
Norethindrone	1.03e-05	10	Contraceptive Agents, Contraceptive Agents, Female, Contraceptives, Oral, Contraceptives, Oral, Synthetic, Reproductive Control Agents,	No	No
Caffeine	1.04e-05	525	Central Nervous System Agents, Central Nervous System Stimulants, Enzyme Inhibitors, Phosphodiesterase Inhibitors,	Yes	No
Fenretinide	1.12e-05	21	Anticarcinogenic Agents, Antineoplastic Agents, Protective Agents,	No	No
Brefeldin A	1.14e-05	56	Anti-Bacterial Agents, Anti-Infective Agents, Antifungal Agents, Antiviral Agents, Enzyme Inhibitors, Protein Synthesis Inhibitors,	Yes	No
Immunoglobulin J-Chains	1.16e-05	26	Immunologic Factors,	No	No
Sodium Phosphate	1.17e-05	27	Cathartics, Gastrointestinal Agents,	No	No
Chloroquine	1.18e-05	120	Amebicides, Anti-Infective Agents, Antimalarials, Antiparasitic Agents, Antiprotozoal Agents, Antirheumatic Agents,	Yes	No
Carbachol	1.19e-05	226	Analgesics, Analgesics, Non-Narcotic, Autonomic Agents, Cardiotonic Agents, Cardiovascular Agents, Central Nervous System Agents, Cholinergic Agents, Cholinergic Agonists, Miotics, Protective Agents, Peripheral Nervous System Agents, Neurotransmitter Agents, Sensory System Agents,	Yes	No
Buthionine Sulfoximine	1.37e-05	32	Antimetabolites, Antimetabolites, Antineoplastic, Antineoplastic Agents, Enzyme Inhibitors, Noxae, Protective Agents, Radiation-Protective Agents, Radiation-Sensitizing Agents,	No	No
Bicarbonates	1.44e-05	61	Buffers,	Yes	No
Vincristine	1.48e-05	545	Antimitotic Agents, Antineoplastic Agents, Antineoplastic Agents, Phytogenic, Mitosis Modulators, Tubulin Modulators,	Yes	No
Azacitidine	1.49e-05	200	Antimetabolites, Antimetabolites, Antineoplastic, Antineoplastic Agents, Enzyme Inhibitors, Noxae,	Yes	No
Diethylstilbestrol	1.57e-05	170	Antineoplastic Agents, Antineoplastic Agents, Hormonal, Carcinogens, Estrogens, Estrogens, Non-Steroidal, Noxae, Hormones, Hormones, Hormone Substitutes, and Hormone Antagonists,	Yes	No
Nimustine	1.65e-05	44	Antineoplastic Agents,	No	No
Somatostatin	1.78e-05	143	Hormones, Hormone Substitutes, and Hormone Antagonists, Hormones,	Yes	No
Minocycline	2.05e-05	39	Anti-Infective Agents, Anti-Bacterial Agents,	No	No
Lindane	2.49e-05	25	Pesticides, Insecticides,	No	No
Nevirapine	2.52e-05	8	Anti-Infective Agents, Anti-HIV Agents, Anti-Retroviral Agents, Antiviral Agents, Enzyme Inhibitors, Nucleic Acid Synthesis Inhibitors, Reverse Transcriptase Inhibitors,	No	No
Heroin	2.62e-05	29	Analgesics, Analgesics, Opioid, Central Nervous System Agents, Central Nervous System Depressants, Narcotics, Peripheral Nervous System Agents, Sensory System Agents,	No	No
Lithium	2.71e-05	201	Antimanic Agents, Antipsychotic Agents, Central Nervous System Agents, Central Nervous System Depressants, Tranquilizing Agents, Psychotropic Drugs,	Yes	No
Phenoxybenzamine	2.82e-05	14	Adrenergic Agents, Adrenergic alpha-Antagonists, Adrenergic Antagonists, Antihypertensive Agents, Cardiovascular Agents, Neurotransmitter Agents, Vasodilator Agents,	No	No
Meropenem	2.84e-05	41	Anti-Infective Agents, Anti-Bacterial Agents,	No	No
Pantoprazole	2.86e-05	7	Anti-Ulcer Agents, Gastrointestinal Agents,	No	No
Indocyanine Green	2.96e-05	36	Coloring Agents,	Yes	No
Bilirubin	3.13e-05	24	Antioxidants, Protective Agents,	Yes	No
Leuprolide	3.18e-05	19	Antineoplastic Agents, Hormonal, Antineoplastic Agents, Fertility Agents, Fertility Agents, Female, Reproductive Control Agents,	No	No
Arsenic Trioxide	3.33e-05	180	Antineoplastic Agents,	No	No
Dantrolene	3.36e-05	25	Central Nervous System Agents, Muscle Relaxants, Central, Neuromuscular Agents, Peripheral Nervous System Agents,	No	No
Alemtuzumab	3.51e-05	7	Antineoplastic Agents,	No	No
Propofol	3.72e-05	71	Anesthetics, Anesthetics, General, Anesthetics, Intravenous, Central Nervous System Depressants, Central Nervous System Agents, Hypnotics and Sedatives,	Yes	No
Physostigmine	3.84e-05	16	Autonomic Agents, Cholinergic Agents, Cholinesterase Inhibitors, Enzyme Inhibitors, Miotics, Peripheral Nervous System Agents, Neurotransmitter Agents,	No	No
Immunoglobulin Isotypes	3.94e-05	49	Immunologic Factors,	No	No
Gamma-Globulins	4.09e-05	24	Immunologic Factors,	Yes	No
Estramustine	4.16e-05	24	Alkylating Agents, Antineoplastic Agents, Antineoplastic Agents, Alkylating, Antineoplastic Agents, Hormonal, Noxae,	Yes	No
Clomipramine	4.78e-05	13	Antidepressive Agents, Antidepressive Agents, Tricyclic, Central Nervous System Agents, Neurotransmitter Agents, Neurotransmitter Uptake Inhibitors, Serotonin Agents, Serotonin Uptake Inhibitors, Psychotropic Drugs,	No	No
Lidocaine	4.91e-05	73	Anesthetics, Anesthetics, Local, Anti-Arrhythmia Agents, Cardiovascular Agents, Central Nervous System Agents, Central Nervous System Depressants, Peripheral Nervous System Agents, Sensory System Agents,	Yes	No
Aminoglutethimide	5.21e-05	7	Adrenergic Agents, Antineoplastic Agents, Antineoplastic Agents, Hormonal, Aromatase Inhibitors, Enzyme Inhibitors, Neurotransmitter Agents,	Yes	No
Mephenytoin	5.93e-05	6	Anticonvulsants, Central Nervous System Agents,	No	No
Interferon-Alpha	6.18e-05	434	Anti-Infective Agents, Antiviral Agents, Immunologic Factors,	Yes	No
Clindamycin	6.23e-05	28	Anti-Bacterial Agents, Anti-Infective Agents, Enzyme Inhibitors, Protein Synthesis Inhibitors,	No	No
Rosuvastatin	6.69e-05	8	Anticholesteremic Agents, Antilipemic Agents, Antimetabolites, Enzyme Inhibitors, Hydroxymethylglutaryl-CoA Reductase Inhibitors,	No	No
Saquinavir	6.71e-05	17	Anti-HIV Agents, Anti-Infective Agents, Anti-Retroviral Agents, Antiviral Agents, Enzyme Inhibitors, Protease Inhibitors, HIV Protease Inhibitors,	No	No
Ethylmaleimide	7.06e-05	45	Enzyme Inhibitors, Indicators and Reagents, Sulfhydryl Reagents,	No	No
Flunitrazepam	7.14e-05	27	Anti-Anxiety Agents, Central Nervous System Agents, Central Nervous System Depressants, GABA Agents, GABA Modulators, Neurotransmitter Agents, Tranquilizing Agents, Psychotropic Drugs,	No	No
Okadaic Acid	7.62e-05	363	Carcinogens, Enzyme Inhibitors, Membrane Transport Modulators, Noxae, Ionophores,	Yes	No
Complement C5A	7.96e-05	13	Immunologic Factors,	No	No
Vancomycin	8.62e-05	119	Anti-Bacterial Agents, Anti-Infective Agents,	Yes	No
Piroxicam	8.77e-05	34	Analgesics, Analgesics, Non-Narcotic, Anti-Inflammatory Agents, Non-Steroidal, Anti-Inflammatory Agents, Antirheumatic Agents, Cyclooxygenase Inhibitors, Enzyme Inhibitors, Peripheral Nervous System Agents, Sensory System Agents,	No	No
Sodium Dodecyl Sulfate	9.8e-05	38	Surface-Active Agents,	Yes	No
Methadone	0.000100008	17	Analgesics, Analgesics, Opioid, Antitussive Agents, Central Nervous System Agents, Central Nervous System Depressants, Narcotics, Peripheral Nervous System Agents, Respiratory System Agents, Sensory System Agents,	No	No
Albuterol	0.000103588	12	Adrenergic Agonists, Adrenergic Agents, Adrenergic beta-Agonists, Anti-Asthmatic Agents, Autonomic Agents, Bronchodilator Agents, Peripheral Nervous System Agents, Neurotransmitter Agents, Tocolytic Agents, Reproductive Control Agents, Respiratory System Agents,	No	No
Probenecid	0.000108343	21	Adjuvants, Pharmaceutic, Antirheumatic Agents, Pharmaceutic Aids, Gout Suppressants, Uricosuric Agents, Renal Agents,	No	No
Ozone	0.00013368	24	Air Pollutants, Environmental Pollutants, Noxae, Oxidants, Oxidants, Photochemical,	No	No
Asparaginase	0.000138491	29	Antineoplastic Agents,	Yes	No
Cysteamine	0.000148998	31	Protective Agents, Radiation-Protective Agents,	No	No
Kallikreins	0.0001529	11	Coagulants, Fertility Agents, Fertility Agents, Male, Hematologic Agents, Reproductive Control Agents,	Yes	No
Exemestane	0.000153265	8	Antineoplastic Agents, Aromatase Inhibitors, Enzyme Inhibitors,	No	No
Methylphenidate	0.000165707	21	Central Nervous System Agents, Central Nervous System Stimulants, Dopamine Agents, Dopamine Uptake Inhibitors, Neurotransmitter Agents, Neurotransmitter Uptake Inhibitors,	No	No
Sulfamethazine	0.000174286	9	Anti-Infective Agents,	No	No
4-Nitroquinoline-1-Oxide	0.000174392	56	Carcinogens, Noxae, Mutagens,	No	No
Hydralazine	0.000177293	27	Antihypertensive Agents, Cardiovascular Agents, Vasodilator Agents,	No	No
Ditiocarb	0.00017894	15	Adjuvants, Immunologic, Anti-Infective Agents, Antiviral Agents, Chelating Agents, Immunologic Factors,	No	No
1-(5-Isoquinolinesulfonyl)-2-Methylpiperazine	0.000180925	58	Enzyme Inhibitors,	No	No
Pectin	0.000185399	33	Antidiarrheals, Gastrointestinal Agents,	No	No
Levamisole	0.000185399	24	Adjuvants, Immunologic, Anthelmintics, Anti-Infective Agents, Antinematodal Agents, Antiparasitic Agents, Antirheumatic Agents, Immunologic Factors,	No	No
Clopidogrel	0.000188169	17	Hematologic Agents, Platelet Aggregation Inhibitors,	No	No
Methoxsalen	0.000197443	14	Dermatologic Agents, Cross-Linking Reagents, Indicators and Reagents, Photosensitizing Agents, Radiation-Sensitizing Agents,	No	No
Puromycin	0.000203225	31	Anti-Infective Agents, Antimetabolites, Antimetabolites, Antineoplastic, Antiparasitic Agents, Antineoplastic Agents, Antiprotozoal Agents, Enzyme Inhibitors, Noxae, Protein Synthesis Inhibitors, Trypanocidal Agents,	No	No
Tobramycin	0.000215793	29	Anti-Bacterial Agents, Anti-Infective Agents,	No	No
Tamsulosin	0.000225543	6	Adrenergic Agents, Adrenergic alpha-Antagonists, Adrenergic Antagonists, Antineoplastic Agents, Neurotransmitter Agents,	No	No
Protein C	0.0002326	377	Anticoagulants, Cardiovascular Agents, Fibrinolytic Agents, Fibrin Modulating Agents, Hematologic Agents,	Yes	No
Triazolam	0.000232744	7	Adjuvants, Anesthesia, Anti-Anxiety Agents, Central Nervous System Depressants, Central Nervous System Agents, GABA Agents, GABA Modulators, Neurotransmitter Agents, Tranquilizing Agents, Psychotropic Drugs,	No	No
Immunoglobulin Variable Region	0.000234751	168	Immunologic Factors,	Yes	No
Tolfenamic Acid	0.000251996	8	Analgesics, Analgesics, Non-Narcotic, Anti-Inflammatory Agents, Anti-Inflammatory Agents, Non-Steroidal, Antirheumatic Agents, Calcium Channel Blockers, Cardiovascular Agents, Central Nervous System Agents, Hormones, Hormone Substitutes, and Hormone Antagonists, Membrane Transport Modulators, Peripheral Nervous System Agents, Hormone Antagonists, Neurotransmitter Agents, Prostaglandin Antagonists…	No	No
Hexobarbital	0.000252746	6	Central Nervous System Agents, Central Nervous System Depressants, GABA Agents, GABA Modulators, Hypnotics and Sedatives, Neurotransmitter Agents,	No	No
Docetaxel	0.000266236	158	Antineoplastic Agents,	No	No
Phentolamine	0.000266313	65	Adrenergic Agents, Adrenergic alpha-Antagonists, Adrenergic Antagonists, Antihypertensive Agents, Cardiovascular Agents, Neurotransmitter Agents,	Yes	No
Pilocarpine	0.000270123	31	Autonomic Agents, Cholinergic Agents, Cholinergic Agonists, Miotics, Muscarinic Agonists, Peripheral Nervous System Agents, Neurotransmitter Agents,	No	No
Cefsulodin	0.000272333	19	Anti-Bacterial Agents, Anti-Infective Agents,	No	No
Desflurane	0.000291319	15	Anesthetics, Anesthetics, General, Anesthetics, Inhalation, Central Nervous System Agents, Central Nervous System Depressants,	No	No
Azithromycin	0.000302404	22	Anti-Bacterial Agents, Anti-Infective Agents,	No	No
Tazobactam	0.000322156	10	Enzyme Inhibitors,	No	No
Methyl Methanesulfonate	0.000326504	237	Alkylating Agents, Antineoplastic Agents, Alkylating, Antineoplastic Agents, Noxae, Mutagens,	No	No
Pregabalin	0.000335754	14	Analgesics, Anticonvulsants, Central Nervous System Agents, Peripheral Nervous System Agents, Sensory System Agents,	No	No
Ropivacaine	0.000344135	8	Anesthetics, Anesthetics, Local, Central Nervous System Depressants, Central Nervous System Agents, Peripheral Nervous System Agents, Sensory System Agents,	No	No
Promethazine	0.000351621	12	Anti-Allergic Agents, Antipruritics, Dermatologic Agents, Histamine Agents, Histamine Antagonists, Histamine H1 Antagonists, Neurotransmitter Agents,	No	No
Midazolam	0.000360036	55	Adjuvants, Anesthesia, Anesthetics, Anesthetics, General, Anesthetics, Intravenous, Anti-Anxiety Agents, Central Nervous System Agents, Central Nervous System Depressants, GABA Agents, GABA Modulators, Hypnotics and Sedatives, Neurotransmitter Agents, Tranquilizing Agents, Psychotropic Drugs,	No	No
Fluconazole	0.000361076	35	Anti-Infective Agents, Antifungal Agents,	No	No
Alpha-Tocopherol	0.000396659	17	Antioxidants, Protective Agents, Micronutrients, Growth Substances, Vitamins,	Yes	No
Lomustine	0.000415959	23	Alkylating Agents, Antineoplastic Agents, Alkylating, Antineoplastic Agents, Noxae,	Yes	Yes
Titanium Dioxide	0.000419215	18	Biocompatible Materials, Cosmetics, Coloring Agents, Dermatologic Agents, Protective Agents, Photosensitizing Agents, Sunscreening Agents, Radiation-Protective Agents, Radiation-Sensitizing Agents,	No	No
Leflunomide	0.000430296	12	Antirheumatic Agents, Enzyme Inhibitors, Immunologic Factors, Immunosuppressive Agents,	No	No
Diphtheria Toxin	0.000449731	171	Noxae, Poisons,	Yes	No
Hydroxyl Radical	0.000494939	57	Noxae, Oxidants,	No	No
Chlortetracycline	0.000510996	7	Anti-Bacterial Agents, Anti-Infective Agents, Antiparasitic Agents, Antiprotozoal Agents, Enzyme Inhibitors, Protein Synthesis Inhibitors,	No	No
Primidone	0.000535672	12	Anticonvulsants, Central Nervous System Agents,	No	No
Thiopental	0.000563627	28	Anesthetics, Anesthetics, General, Anesthetics, Intravenous, Anticonvulsants, Central Nervous System Depressants, Central Nervous System Agents, GABA Agents, GABA Modulators, Hypnotics and Sedatives, Neurotransmitter Agents,	No	No
Cholestyramine	0.000573979	7	Anion Exchange Resins, Anticholesteremic Agents, Antilipemic Agents, Antimetabolites, Ion Exchange Resins,	Yes	No
Miconazole	0.000573979	8	Anti-Infective Agents, Antifungal Agents,	No	No
Tuftsin	0.000575642	15	Immunologic Factors,	No	No
Sertraline	0.000611528	7	Antidepressive Agents, Central Nervous System Agents, Neurotransmitter Agents, Neurotransmitter Uptake Inhibitors, Serotonin Agents, Serotonin Uptake Inhibitors, Psychotropic Drugs,	No	No
Antimicrobial Cationic Peptides	0.000644345	30	Anti-Infective Agents,	No	No
Terbinafine	0.000649479	7	Anti-Infective Agents, Antifungal Agents, Enzyme Inhibitors,	No	No
Linezolid	0.000710726	9	Anti-Infective Agents, Enzyme Inhibitors, Protein Synthesis Inhibitors,	No	No
Pirenzepine	0.000771253	25	Anti-Ulcer Agents, Cholinergic Agents, Cholinergic Antagonists, Gastrointestinal Agents, Muscarinic Antagonists, Neurotransmitter Agents,	No	No
Felodipine	0.000785651	12	Anti-Arrhythmia Agents, Antihypertensive Agents, Cardiovascular Agents, Calcium Channel Blockers, Membrane Transport Modulators, Vasodilator Agents,	No	No
Cefoperazone	0.000824842	16	Anti-Bacterial Agents, Anti-Infective Agents,	No	No
Venlafaxine	0.000839269	5	Antidepressive Agents, Antidepressive Agents, Second-Generation, Central Nervous System Agents, Neurotransmitter Agents, Neurotransmitter Uptake Inhibitors, Serotonin Agents, Serotonin Uptake Inhibitors, Psychotropic Drugs,	No	No
Azelastine	0.000839269	7	Anti-Allergic Agents, Anti-Asthmatic Agents, Autonomic Agents, Bronchodilator Agents, Enzyme Inhibitors, Peripheral Nervous System Agents, Neurotransmitter Agents, Histamine Agents, Histamine Antagonists, Histamine H1 Antagonists, Histamine H1 Antagonists, Non-Sedating, Lipoxygenase Inhibitors, Respiratory System Agents,	No	No
Phenylephrine	0.000977255	230	Adrenergic Agents, Adrenergic Agonists, Adrenergic alpha-Agonists, Autonomic Agents, Cardiotonic Agents, Cardiovascular Agents, Protective Agents, Mydriatics, Nasal Decongestants, Peripheral Nervous System Agents, Neurotransmitter Agents, Sympathomimetics, Vasoconstrictor Agents, Respiratory System Agents,	No	No
Beta-Lactams	0.000990082	125	Anti-Bacterial Agents, Anti-Infective Agents,	No	No
Danazol	0.00112249	9	Estrogen Receptor Modulators, Estrogen Antagonists, Hormone Antagonists, Hormones, Hormone Substitutes, and Hormone Antagonists,	No	No
Zolmitriptan	0.00113229	6	Neurotransmitter Agents, Serotonin Agents, Serotonin Agonists,	No	No
Doxazosin	0.00117755	17	Adrenergic alpha-Antagonists, Adrenergic Agents, Adrenergic Antagonists, Antihypertensive Agents, Cardiovascular Agents, Neurotransmitter Agents,	No	No
Azoxymethane	0.00119146	22	Carcinogens, Noxae,	No	No
Tunicamycin	0.00122843	28	Anti-Bacterial Agents, Anti-Infective Agents, Antiviral Agents,	Yes	No
Ursodeoxycholic Acid	0.00134183	21	Cholagogues and Choleretics, Gastrointestinal Agents,	Yes	No
Lincomycin	0.00136771	8	Anti-Infective Agents, Anti-Bacterial Agents, Enzyme Inhibitors, Protein Synthesis Inhibitors,	No	No
Tretinoin	0.00139398	1008	Antineoplastic Agents, Dermatologic Agents, Keratolytic Agents,	Yes	No
Muscimol	0.00139398	24	GABA Agents, GABA Agonists, Neurotransmitter Agents,	No	No
Kanamycin	0.00141308	91	Anti-Bacterial Agents, Anti-Infective Agents, Enzyme Inhibitors, Protein Synthesis Inhibitors,	No	No
Podophyllotoxin	0.00141695	34	Antimitotic Agents, Antineoplastic Agents, Phytogenic, Antineoplastic Agents, Dermatologic Agents, Mitosis Modulators, Keratolytic Agents, Tubulin Modulators,	No	No
Suramin	0.00148599	39	Anthelmintics, Anti-Infective Agents, Antinematodal Agents, Antiparasitic Agents, Antineoplastic Agents, Antiprotozoal Agents, Trypanocidal Agents,	No	No
Immunoglobulin Kappa-Chains	0.00148666	69	Immunologic Factors,	Yes	No
Quetiapine	0.00148666	6	Antipsychotic Agents, Central Nervous System Depressants, Central Nervous System Agents, Tranquilizing Agents, Psychotropic Drugs,	No	No
Antimycin A	0.00149786	21	Anti-Bacterial Agents, Anti-Infective Agents, Antifungal Agents,	Yes	No
Octreotide	0.00156294	90	Antineoplastic Agents, Hormonal, Antineoplastic Agents, Gastrointestinal Agents,	Yes	No
Phenol	0.0015665	242	Anti-Infective Agents, Anti-Infective Agents, Local, Cardiovascular Agents, Disinfectants, Pharmaceutical Solutions, Sclerosing Solutions,	No	No
Carbonyl Cyanide M-Chlorophenyl Hydrazone	0.0015665	13	Enzyme Inhibitors, Membrane Transport Modulators, Ionophores, Uncoupling Agents,	No	No
Thioridazine	0.00160189	7	Antipsychotic Agents, Central Nervous System Depressants, Central Nervous System Agents, Dopamine Agents, Dopamine Antagonists, Neurotransmitter Agents, Tranquilizing Agents, Psychotropic Drugs,	No	No
Atropine	0.00170083	206	Adjuvants, Anesthesia, Anti-Arrhythmia Agents, Anti-Asthmatic Agents, Autonomic Agents, Cardiovascular Agents, Bronchodilator Agents, Central Nervous System Agents, Cholinergic Agents, Cholinergic Antagonists, Muscarinic Antagonists, Parasympatholytics, Mydriatics, Peripheral Nervous System Agents, Neurotransmitter Agents, Respiratory System Agents,	Yes	No
Eptifibatide	0.00170083	5	Hematologic Agents, Platelet Aggregation Inhibitors,	No	No
Asbestos	0.00171351	13	Carcinogens, Noxae,	Yes	No
Gemfibrozil	0.00178047	20	Antilipemic Agents, Antimetabolites,	No	No
Isoantibodies	0.00178445	17	Immunologic Factors,	Yes	No
Hemolysin Proteins	0.00187673	11	Cytotoxins, Noxae, Hemolytic Agents,	No	No
Valsartan	0.00188318	7	Antihypertensive Agents, Cardiovascular Agents,	No	No
Niacin	0.00194472	22	Antilipemic Agents, Antimetabolites, Cardiovascular Agents, Micronutrients, Growth Substances, Vasodilator Agents, Vitamin B Complex, Vitamins,	No	No
Doxorubicin	0.00225731	1885	Antibiotics, Antineoplastic, Antineoplastic Agents,	Yes	No
Phenolphthalein	0.00231454	9	Indicators and Reagents,	No	No
Growth Hormone-Releasing Hormone	0.002345	19	Hormones, Hormones, Hormone Substitutes, and Hormone Antagonists,	Yes	No
Cabergoline	0.00242515	6	Anti-Dyskinesia Agents, Antineoplastic Agents, Antiparkinson Agents, Central Nervous System Agents, Dopamine Agents, Dopamine Agonists, Neurotransmitter Agents,	No	No
Ketorolac	0.00256144	26	Analgesics, Analgesics, Non-Narcotic, Anti-Inflammatory Agents, Non-Steroidal, Anti-Inflammatory Agents, Antirheumatic Agents, Cyclooxygenase Inhibitors, Enzyme Inhibitors, Peripheral Nervous System Agents, Sensory System Agents,	No	No
Methylnitrosourea	0.0026598	73	Alkylating Agents, Noxae,	Yes	No
Mineral Oil	0.00276398	15	Dermatologic Agents, Emollients,	Yes	No
Taurocholic Acid	0.00284328	17	Cholagogues and Choleretics, Detergents, Surface-Active Agents, Gastrointestinal Agents,	No	No
8-Hydroxy-2-(Di-N-Propylamino)Tetralin	0.00286996	13	Neurotransmitter Agents, Serotonin Agonists, Serotonin Agents,	No	No
Misonidazole	0.00295427	13	Anti-Infective Agents, Antiparasitic Agents, Antiprotozoal Agents, Antineoplastic Agents, Radiation-Sensitizing Agents,	Yes	No
Trovafloxacin	0.00296227	45	Anti-Infective Agents,	No	No
Terfenadine	0.00297103	14	Histamine Agents, Histamine Antagonists, Histamine H1 Antagonists, Histamine H1 Antagonists, Non-Sedating, Neurotransmitter Agents,	No	No
Pyridoxal Phosphate	0.00298977	16	Micronutrients, Growth Substances, Vitamin B Complex, Vitamins,	Yes	No
Ouabain	0.00312553	194	Cardiotonic Agents, Cardiovascular Agents, Enzyme Inhibitors, Protective Agents,	No	No
Nitrofurantoin	0.00324314	15	Anti-Infective Agents, Anti-Infective Agents, Urinary, Renal Agents,	No	No
Vindesine	0.00336846	23	Antimitotic Agents, Antineoplastic Agents, Antineoplastic Agents, Phytogenic, Mitosis Modulators, Tubulin Modulators,	No	No
Tranylcypromine	0.00344595	5	Anti-Anxiety Agents, Antidepressive Agents, Central Nervous System Depressants, Central Nervous System Agents, Enzyme Inhibitors, Monoamine Oxidase Inhibitors, Tranquilizing Agents, Psychotropic Drugs,	No	No
Adrenomedullin	0.00349213	43	Anti-Asthmatic Agents, Antihypertensive Agents, Autonomic Agents, Cardiotonic Agents, Cardiovascular Agents, Bronchodilator Agents, Protective Agents, Peripheral Nervous System Agents, Vasodilator Agents, Respiratory System Agents,	Yes	No
Thalidomide	0.00350217	56	Angiogenesis Inhibitors, Angiogenesis Modulating Agents, Anti-Bacterial Agents, Anti-Infective Agents, Antineoplastic Agents, Noxae, Growth Substances, Immunologic Factors, Immunosuppressive Agents, Leprostatic Agents, Teratogens, Growth Inhibitors,	Yes	No
Gentamicins	0.00354787	18	Anti-Bacterial Agents, Anti-Infective Agents, Enzyme Inhibitors, Protein Synthesis Inhibitors,	No	No
Octoxynol	0.00366125	28	Antifoaming Agents, Antispermatogenic Agents, Contraceptive Agents, Contraceptive Agents, Female, Detergents, Excipients, Noxae, Pharmaceutic Aids, Spermatocidal Agents, Surface-Active Agents, Vehicles, Reproductive Control Agents,	Yes	No
Buspirone	0.00402518	29	Anti-Anxiety Agents, Central Nervous System Agents, Central Nervous System Depressants, Neurotransmitter Agents, Serotonin Agonists, Serotonin Agents, Tranquilizing Agents, Psychotropic Drugs,	No	No
Methoxamine	0.00416476	22	Adrenergic Agonists, Adrenergic alpha-Agonists, Adrenergic Agents, Autonomic Agents, Cardiovascular Agents, Peripheral Nervous System Agents, Neurotransmitter Agents, Sympathomimetics, Vasoconstrictor Agents,	No	No
Beta 2-Glycoprotein I	0.00426773	30	Anticoagulants, Hematologic Agents,	No	No
Abscisic Acid	0.00434235	11	Plant Growth Regulators, Growth Substances,	No	No
Sucralfate	0.00439565	6	Anti-Ulcer Agents, Gastrointestinal Agents,	No	No
Ketamine	0.00448997	63	Analgesics, Anesthetics, Anesthetics, Dissociative, Anesthetics, General, Anesthetics, Intravenous, Central Nervous System Agents, Central Nervous System Depressants, Excitatory Amino Acid Agents, Excitatory Amino Acid Antagonists, Peripheral Nervous System Agents, Neurotransmitter Agents, Sensory System Agents,	No	No
Lorazepam	0.00456771	11	Anti-Anxiety Agents, Anticonvulsants, Antiemetics, Autonomic Agents, Central Nervous System Agents, Central Nervous System Depressants, GABA Agents, GABA Modulators, Gastrointestinal Agents, Hypnotics and Sedatives, Peripheral Nervous System Agents, Neurotransmitter Agents, Tranquilizing Agents, Psychotropic Drugs,	No	No
Medroxyprogesterone 17-Acetate	0.00471086	48	Antineoplastic Agents, Hormonal, Antineoplastic Agents, Contraceptive Agents, Contraceptive Agents, Female, Contraceptive Agents, Male, Reproductive Control Agents,	Yes	No
Diphosphonates	0.00473755	22	Bone Density Conservation Agents,	Yes	No
Sucrose	0.00499111	55	Flavoring Agents, Food Additives, Sweetening Agents,	No	No
Fibrin Fibrinogen Degradation Products	0.00500971	18	Anticoagulants, Hematologic Agents,	Yes	No
Magnesium Sulfate	0.00536513	14	Analgesics, Anesthetics, Anti-Arrhythmia Agents, Anticonvulsants, Cardiovascular Agents, Calcium Channel Blockers, Central Nervous System Agents, Central Nervous System Depressants, Membrane Transport Modulators, Peripheral Nervous System Agents, Tocolytic Agents, Reproductive Control Agents, Sensory System Agents,	No	No
Methacholine Chloride	0.00546705	11	Autonomic Agents, Bronchoconstrictor Agents, Cholinergic Agents, Cholinergic Agonists, Miotics, Muscarinic Agonists, Parasympathomimetics, Peripheral Nervous System Agents, Neurotransmitter Agents, Respiratory System Agents,	No	No
Quinupristin	0.00584916	7	Anti-Bacterial Agents, Anti-Infective Agents,	No	No
Dalfopristin	0.00592948	7	Anti-Bacterial Agents, Anti-Infective Agents,	No	No
Lactams	0.00601156	68	Anti-Bacterial Agents, Anti-Infective Agents,	Yes	No
Caspofungin	0.00605963	7	Anti-Infective Agents, Antifungal Agents,	No	No
Nelfinavir	0.00665755	13	Anti-Infective Agents, Anti-HIV Agents, Anti-Retroviral Agents, Antiviral Agents, Enzyme Inhibitors, Protease Inhibitors, HIV Protease Inhibitors,	No	No
Exenatide	0.00665755	5	Hypoglycemic Agents,	No	No
Penicillin V	0.00668777	12	Anti-Infective Agents, Anti-Bacterial Agents,	No	No
Diazepam	0.00675519	111	Adjuvants, Anesthesia, Anesthetics, Anesthetics, General, Anesthetics, Intravenous, Anti-Anxiety Agents, Anticonvulsants, Antiemetics, Autonomic Agents, Central Nervous System Agents, Central Nervous System Depressants, GABA Agents, GABA Modulators, Gastrointestinal Agents, Hypnotics and Sedatives, Muscle Relaxants, Central, Neuromuscular Agents, Peripheral Nervous System Agents, Neurotransmitter…	Yes	No
Nicardipine	0.00702643	31	Antihypertensive Agents, Cardiovascular Agents, Calcium Channel Blockers, Membrane Transport Modulators, Vasodilator Agents,	No	No
Probucol	0.00705892	12	Anticholesteremic Agents, Antilipemic Agents, Antimetabolites, Antioxidants, Protective Agents,	No	No
Iodine	0.00722644	199	Anti-Infective Agents, Anti-Infective Agents, Local, Micronutrients, Growth Substances, Trace Elements,	Yes	No
Nafcillin	0.00722644	10	Anti-Infective Agents, Anti-Bacterial Agents,	No	No
Sulfadiazine	0.00746652	5	Anti-Infective Agents, Antiparasitic Agents, Antiprotozoal Agents, Coccidiostats,	No	No
Auranofin	0.00754198	10	Antirheumatic Agents,	No	No
Amiodarone	0.00759205	29	Anti-Arrhythmia Agents, Cardiovascular Agents, Enzyme Inhibitors, Vasodilator Agents,	No	No
Zileuton	0.00759205	4	Analgesics, Analgesics, Non-Narcotic, Anti-Inflammatory Agents, Anti-Inflammatory Agents, Non-Steroidal, Antirheumatic Agents, Enzyme Inhibitors, Hormones, Hormone Substitutes, and Hormone Antagonists, Peripheral Nervous System Agents, Hormone Antagonists, Leukotriene Antagonists, Lipoxygenase Inhibitors, Sensory System Agents,	No	No
Camphor	0.00762756	6	Anti-Infective Agents, Anti-Infective Agents, Local,	No	No
Minoxidil	0.00762756	8	Antihypertensive Agents, Cardiovascular Agents, Vasodilator Agents,	No	No
Vehicle Emissions	0.00768578	15	Air Pollutants, Environmental Pollutants,	No	No
Remifentanil	0.00774731	8	Analgesics, Analgesics, Opioid, Anesthetics, Anesthetics, General, Anesthetics, Intravenous, Central Nervous System Depressants, Central Nervous System Agents, Hypnotics and Sedatives, Peripheral Nervous System Agents, Sensory System Agents,	No	No
Cefamandole	0.00777404	10	Anti-Bacterial Agents, Anti-Infective Agents,	No	No
Iloprost	0.00786298	17	Cardiovascular Agents, Hematologic Agents, Platelet Aggregation Inhibitors, Vasodilator Agents,	No	No
Phenobarbital	0.00801045	320	Anticonvulsants, Central Nervous System Depressants, Central Nervous System Agents, GABA Agents, GABA Modulators, Excitatory Amino Acid Agents, Excitatory Amino Acid Antagonists, Hypnotics and Sedatives, Neurotransmitter Agents,	Yes	No
Nystatin	0.00820704	29	Anti-Infective Agents, Anti-Bacterial Agents, Antifungal Agents, Membrane Transport Modulators, Ionophores,	No	No
Rifabutin	0.00821752	49	Anti-Bacterial Agents, Anti-Infective Agents, Antibiotics, Antitubercular, Antitubercular Agents,	No	No
Efavirenz	0.00836432	8	Anti-Infective Agents, Anti-HIV Agents, Anti-Retroviral Agents, Antiviral Agents, Enzyme Inhibitors, Nucleic Acid Synthesis Inhibitors, Reverse Transcriptase Inhibitors,	No	No
Ketanserin	0.00870196	13	Antihypertensive Agents, Cardiovascular Agents, Hematologic Agents, Neurotransmitter Agents, Platelet Aggregation Inhibitors, Serotonin Agents, Serotonin Antagonists,	No	No
Ritonavir	0.00883214	17	Anti-HIV Agents, Anti-Infective Agents, Anti-Retroviral Agents, Antiviral Agents, Enzyme Inhibitors, Protease Inhibitors, HIV Protease Inhibitors,	No	No
Galantamine	0.00892485	7	Autonomic Agents, Central Nervous System Agents, Cholinergic Agents, Cholinesterase Inhibitors, Enzyme Inhibitors, Parasympathomimetics, Peripheral Nervous System Agents, Neurotransmitter Agents, Nootropic Agents,	No	No
Desipramine	0.00970657	35	Adrenergic Agents, Adrenergic Uptake Inhibitors, Antidepressive Agents, Antidepressive Agents, Tricyclic, Central Nervous System Agents, Enzyme Inhibitors, Neurotransmitter Agents, Neurotransmitter Uptake Inhibitors, Psychotropic Drugs,	No	No
Oxaprozin	0.00977072	3	Analgesics, Analgesics, Non-Narcotic, Anti-Inflammatory Agents, Non-Steroidal, Anti-Inflammatory Agents, Antirheumatic Agents, Peripheral Nervous System Agents, Sensory System Agents,	No	No
Glyburide	0.00981553	28	Hypoglycemic Agents,	Yes	No
Bisoprolol	0.0103618	4	Adrenergic Agents, Adrenergic Antagonists, Adrenergic beta-Antagonists, Antihypertensive Agents, Autonomic Agents, Cardiovascular Agents, Peripheral Nervous System Agents, Neurotransmitter Agents, Sympatholytics,	No	No
Papaverine	0.0103767	34	Cardiovascular Agents, Enzyme Inhibitors, Phosphodiesterase Inhibitors, Vasodilator Agents,	No	No
Dihydrouracil Dehydrogenase (Nadp)	0.0105438	7	Antineoplastic Agents,	Yes	No
Paraquat	0.0105477	39	Herbicides, Pesticides,	No	No
Tosylphenylalanyl Chloromethyl Ketone	0.0108177	24	Alkylating Agents, Enzyme Inhibitors, Protease Inhibitors, Noxae, Protein Synthesis Inhibitors, Serine Proteinase Inhibitors,	No	No
Sunitinib	0.0108274	13	Angiogenesis Inhibitors, Angiogenesis Modulating Agents, Antineoplastic Agents, Growth Substances, Growth Inhibitors,	No	No
Phenelzine	0.0108591	6	Antidepressive Agents, Central Nervous System Agents, Enzyme Inhibitors, Monoamine Oxidase Inhibitors, Psychotropic Drugs,	No	No
Ceftriaxone	0.0110954	63	Anti-Bacterial Agents, Anti-Infective Agents,	No	No
Trichothecenes	0.0117603	16	Noxae, Poisons,	No	No
Budesonide	0.0119243	29	Adrenal Cortex Hormones, Anti-Asthmatic Agents, Anti-Inflammatory Agents, Autonomic Agents, Bronchodilator Agents, Peripheral Nervous System Agents, Hormones, Hormones, Hormone Substitutes, and Hormone Antagonists, Glucocorticoids, Respiratory System Agents,	No	No
Fura-2	0.0119297	30	Chelating Agents, Coloring Agents, Fluorescent Dyes, Luminescent Agents, Indicators and Reagents,	Yes	No
Lupus Coagulation Inhibitor	0.012009	22	Immunologic Factors,	No	No
Immunoglobulin D	0.0125314	24	Immunologic Factors,	No	No
Aztreonam	0.0128614	33	Anti-Bacterial Agents, Anti-Infective Agents,	No	No
Zonisamide	0.0129162	16	Anticonvulsants, Antioxidants, Central Nervous System Agents, Protective Agents,	No	No
Streptomycin	0.0129366	10	Anti-Bacterial Agents, Anti-Infective Agents, Enzyme Inhibitors, Protein Synthesis Inhibitors,	No	No
Deoxycholic Acid	0.0130862	10	Cholagogues and Choleretics, Gastrointestinal Agents,	No	No
Sevoflurane	0.0130974	42	Anesthetics, Anesthetics, General, Anesthetics, Inhalation, Central Nervous System Depressants, Central Nervous System Agents, Hematologic Agents, Platelet Aggregation Inhibitors,	No	No
Dihydrotestosterone	0.0139629	107	Androgens, Hormones, Hormones, Hormone Substitutes, and Hormone Antagonists,	Yes	No
Sodium Salicylate	0.0144017	15	Analgesics, Analgesics, Non-Narcotic, Anti-Inflammatory Agents, Non-Steroidal, Anti-Inflammatory Agents, Antirheumatic Agents, Cyclooxygenase Inhibitors, Enzyme Inhibitors, Peripheral Nervous System Agents, Sensory System Agents,	No	No
Castor Oil	0.0145357	6	Cathartics, Gastrointestinal Agents,	No	No
Anisomycin	0.014538	92	Anti-Bacterial Agents, Anti-Infective Agents, Antiparasitic Agents, Antiprotozoal Agents, Enzyme Inhibitors, Nucleic Acid Synthesis Inhibitors, Protein Synthesis Inhibitors,	No	No
Gamma-Aminobutyric Acid	0.0145627	351	GABA Agents, Neurotransmitter Agents,	Yes	No
Fluoresceins	0.0147783	86	Coloring Agents, Fluorescent Dyes, Luminescent Agents, Indicators and Reagents,	Yes	No
Indomethacin	0.0147783	413	Analgesics, Analgesics, Non-Narcotic, Anti-Inflammatory Agents, Non-Steroidal, Anti-Inflammatory Agents, Antirheumatic Agents, Cardiovascular Agents, Cyclooxygenase Inhibitors, Enzyme Inhibitors, Peripheral Nervous System Agents, Tocolytic Agents, Gout Suppressants, Reproductive Control Agents, Sensory System Agents,	Yes	No
Parabens	0.0150472	17	Food Additives, Food Preservatives, Pharmaceutic Aids, Preservatives, Pharmaceutical,	No	No
Carbenoxolone	0.0150551	8	Anti-Ulcer Agents, Gastrointestinal Agents,	No	No
Ethinyl Estradiol	0.0152564	44	Estrogens, Hormones, Hormones, Hormone Substitutes, and Hormone Antagonists,	No	No
Decitabine	0.0153762	22	Antimetabolites, Antimetabolites, Antineoplastic, Antineoplastic Agents, Enzyme Inhibitors, Noxae, Teratogens,	No	No
Serpins	0.0155337	218	Enzyme Inhibitors, Protease Inhibitors, Serine Proteinase Inhibitors,	Yes	No
Ribavirin	0.0158246	43	Anti-Infective Agents, Antimetabolites, Antiviral Agents, Noxae,	Yes	No
Foscarnet	0.0160438	5	Anti-Infective Agents, Anti-Retroviral Agents, Antiviral Agents, Enzyme Inhibitors, Nucleic Acid Synthesis Inhibitors, Reverse Transcriptase Inhibitors,	No	No
Zinc Sulfate	0.0160532	11	Astringents, Dermatologic Agents,	No	No
Ferric Compounds	0.0160743	64	Hematinics, Hematologic Agents,	Yes	No
Azlocillin	0.0162489	9	Anti-Bacterial Agents, Anti-Infective Agents,	No	No
Acetaminophen	0.0164404	112	Analgesics, Analgesics, Non-Narcotic, Central Nervous System Agents, Peripheral Nervous System Agents, Sensory System Agents,	Yes	No
Amanitins	0.0166383	13	Enzyme Inhibitors, Noxae, Nucleic Acid Synthesis Inhibitors, Poisons,	No	No
Immunoglobulin Lambda-Chains	0.016646	43	Immunologic Factors,	No	No
Mycotoxins	0.0168474	12	Noxae, Poisons,	No	No
Sumatriptan	0.0178086	53	Cardiovascular Agents, Neurotransmitter Agents, Serotonin Agents, Serotonin Agonists, Vasoconstrictor Agents,	No	No
Dactinomycin	0.0184585	432	Anti-Bacterial Agents, Anti-Infective Agents, Antibiotics, Antineoplastic, Antineoplastic Agents, Enzyme Inhibitors, Nucleic Acid Synthesis Inhibitors, Protein Synthesis Inhibitors,	Yes	No
Pancuronium	0.0190576	12	Cholinergic Agents, Cholinergic Antagonists, Neuromuscular Agents, Neuromuscular Blocking Agents, Neuromuscular Nondepolarizing Agents, Peripheral Nervous System Agents, Neurotransmitter Agents, Nicotinic Antagonists,	No	No
Betahistine	0.0192262	4	Cardiovascular Agents, Neurotransmitter Agents, Histamine Agents, Histamine Agonists, Vasodilator Agents,	No	No
1-Methyl-3-Isobutylxanthine	0.0192732	19	Enzyme Inhibitors, Phosphodiesterase Inhibitors,	Yes	No
Vitamin B 12	0.0193696	123	Micronutrients, Growth Substances, Vitamin B Complex, Vitamins,	Yes	No
Silymarin	0.0203058	31	Antioxidants, Protective Agents,	No	No
Cocaine	0.0203593	67	Anesthetics, Anesthetics, Local, Cardiovascular Agents, Central Nervous System Agents, Central Nervous System Depressants, Dopamine Agents, Dopamine Uptake Inhibitors, Peripheral Nervous System Agents, Neurotransmitter Agents, Neurotransmitter Uptake Inhibitors, Vasoconstrictor Agents, Sensory System Agents,	No	No
Nisoldipine	0.0204661	9	Antihypertensive Agents, Cardiovascular Agents, Calcium Channel Blockers, Membrane Transport Modulators, Vasodilator Agents,	No	No
Toremifene	0.0205074	19	Antineoplastic Agents, Antineoplastic Agents, Hormonal, Bone Density Conservation Agents, Estrogen Receptor Modulators, Hormones, Hormone Substitutes, and Hormone Antagonists, Hormone Antagonists, Selective Estrogen Receptor Modulators,	No	No
Betaxolol	0.0205845	4	Adrenergic Agents, Adrenergic Antagonists, Adrenergic beta-Antagonists, Antihypertensive Agents, Autonomic Agents, Cardiovascular Agents, Peripheral Nervous System Agents, Neurotransmitter Agents, Sympatholytics,	No	No
Leupeptins	0.0210208	275	Enzyme Inhibitors, Protease Inhibitors,	Yes	No
Clarithromycin	0.0215471	70	Anti-Bacterial Agents, Anti-Infective Agents, Enzyme Inhibitors, Protein Synthesis Inhibitors,	No	No
Daclizumab	0.0217332	5	Immunologic Factors, Immunosuppressive Agents,	No	No
Paromomycin	0.022708	7	Amebicides, Anti-Infective Agents, Anti-Bacterial Agents, Antiparasitic Agents, Antiprotozoal Agents,	No	No
Spironolactone	0.0228825	43	Aldosterone Antagonists, Diuretics, Hormones, Hormone Substitutes, and Hormone Antagonists, Natriuretic Agents, Hormone Antagonists,	Yes	No
Butyric Acid	0.0230457	34	Neurotransmitter Agents, Histamine Agents, Histamine Antagonists,	Yes	No
Amantadine	0.0237176	15	Analgesics, Analgesics, Non-Narcotic, Anti-Infective Agents, Anti-Dyskinesia Agents, Antiparkinson Agents, Antiviral Agents, Central Nervous System Agents, Dopamine Agents, Peripheral Nervous System Agents, Neurotransmitter Agents, Sensory System Agents,	No	No
Cetrorelix	0.0240142	8	Hormone Antagonists, Hormones, Hormone Substitutes, and Hormone Antagonists,	No	No
Tetrodotoxin	0.024628	71	Anesthetics, Anesthetics, Local, Cardiovascular Agents, Central Nervous System Depressants, Central Nervous System Agents, Membrane Transport Modulators, Noxae, Peripheral Nervous System Agents, Poisons, Sodium Channel Blockers, Sensory System Agents,	No	No
Phenylbutazone	0.0247616	11	Analgesics, Analgesics, Non-Narcotic, Anti-Inflammatory Agents, Non-Steroidal, Anti-Inflammatory Agents, Antirheumatic Agents, Peripheral Nervous System Agents, Sensory System Agents,	No	No
Turpentine	0.0250831	14	Noxae, Irritants, Solvents, Riot Control Agents, Chemical,	No	No
Almotriptan	0.0256671	4	Neurotransmitter Agents, Serotonin Agonists, Serotonin Agents,	No	No
Metaraminol	0.0262042	5	Adrenergic Agonists, Adrenergic alpha-Agonists, Adrenergic Agents, Autonomic Agents, Cardiovascular Agents, Peripheral Nervous System Agents, Neurotransmitter Agents, Sympathomimetics, Vasoconstrictor Agents,	No	No
Netilmicin	0.0262205	5	Anti-Infective Agents, Anti-Bacterial Agents, Enzyme Inhibitors, Protein Synthesis Inhibitors,	No	No
Enoxaparin	0.0263874	5	Anticoagulants, Cardiovascular Agents, Fibrinolytic Agents, Fibrin Modulating Agents, Hematologic Agents,	No	No
Coumarins	0.026423	115	Anticoagulants, Antineoplastic Agents, Hematologic Agents, Indicators and Reagents,	No	No
Bacitracin	0.0266031	21	Anti-Bacterial Agents, Anti-Infective Agents, Anti-Infective Agents, Local,	No	No
Arsenicals	0.0272526	138	Indicators and Reagents, Sulfhydryl Reagents,	Yes	No
Antilymphocyte Serum	0.0272984	20	Immunologic Factors, Immunosuppressive Agents,	No	No
Amobarbital	0.0272984	6	Central Nervous System Agents, Central Nervous System Depressants, GABA Agents, GABA Modulators, Hypnotics and Sedatives, Neurotransmitter Agents,	No	No
Antiplasmin	0.0275198	40	Antifibrinolytic Agents, Coagulants, Enzyme Inhibitors, Fibrin Modulating Agents, Protease Inhibitors, Hematologic Agents, Hemostatics, Serine Proteinase Inhibitors,	No	No
Isotretinoin	0.0284761	7	Dermatologic Agents, Noxae, Teratogens,	Yes	No
Cetirizine	0.0286419	5	Anti-Allergic Agents, Neurotransmitter Agents, Histamine Agents, Histamine Antagonists, Histamine H1 Antagonists, Histamine H1 Antagonists, Non-Sedating,	No	No
Saxitoxin	0.0286419	7	Noxae, Poisons,	No	No
Bumetanide	0.0291471	34	Diuretics, Membrane Transport Modulators, Natriuretic Agents, Sodium Potassium Chloride Symporter Inhibitors,	No	No
Lactulose	0.0293959	22	Gastrointestinal Agents,	No	No
Spectinomycin	0.0294291	26	Anti-Bacterial Agents, Anti-Infective Agents,	No	No
Ipratropium	0.0295952	10	Anti-Asthmatic Agents, Autonomic Agents, Bronchodilator Agents, Cholinergic Agents, Cholinergic Antagonists, Peripheral Nervous System Agents, Neurotransmitter Agents, Respiratory System Agents,	No	No
Grepafloxacin	0.0300313	17	Anti-Bacterial Agents, Anti-Infective Agents,	No	No
Hydroxyzine	0.0303443	5	Antipruritics, Dermatologic Agents, Histamine Agents, Histamine Antagonists, Histamine H1 Antagonists, Neurotransmitter Agents,	No	No
Complement System Proteins	0.0304207	114	Immunologic Factors,	Yes	No
Tacrine	0.0305959	8	Autonomic Agents, Cholinergic Agents, Central Nervous System Agents, Cholinesterase Inhibitors, Enzyme Inhibitors, Parasympathomimetics, Peripheral Nervous System Agents, Neurotransmitter Agents, Nootropic Agents,	No	No
Nordihydroguaiaretic Acid	0.0308494	12	Analgesics, Analgesics, Non-Narcotic, Anti-Inflammatory Agents, Non-Steroidal, Anti-Inflammatory Agents, Antioxidants, Cyclooxygenase Inhibitors, Enzyme Inhibitors, Protective Agents, Peripheral Nervous System Agents, Lipoxygenase Inhibitors, Sensory System Agents,	No	No
Sodium Sulfate	0.0325525	20	Cathartics, Gastrointestinal Agents,	No	No
Carnitine	0.0326181	20	Micronutrients, Growth Substances, Vitamin B Complex, Vitamins,	No	No
Chlormethiazole	0.0328972	5	Anticonvulsants, Central Nervous System Agents, Central Nervous System Depressants, GABA Agents, GABA Modulators, Hypnotics and Sedatives, Protective Agents, Neuroprotective Agents, Neurotransmitter Agents,	No	No
Sorafenib	0.0332715	26	Antineoplastic Agents, Enzyme Inhibitors, Protein Kinase Inhibitors,	No	No
Complement Membrane Attack Complex	0.0334422	7	Immunologic Factors,	No	No
Complement Inactivator Proteins	0.0339109	17	Complement Inactivating Agents, Immunologic Factors, Immunosuppressive Agents,	No	No
Acetone	0.0343256	10	Solvents,	No	No
Monensin	0.0345355	13	Anti-Infective Agents, Antifungal Agents, Antiparasitic Agents, Antiprotozoal Agents, Coccidiostats, Membrane Transport Modulators, Ionophores,	Yes	No
Tyrphostins	0.0351912	126	Antineoplastic Agents, Enzyme Inhibitors,	Yes	No
Cilastatin	0.035219	4	Enzyme Inhibitors, Protease Inhibitors,	No	No
Hepatitis B Antibodies	0.0356062	34	Immunologic Factors,	No	No
Gadolinium Dtpa	0.0360876	35	Contrast Media,	Yes	No
Carbogen	0.0362723	8	Radiation-Sensitizing Agents,	No	No
Quinine	0.0363286	53	Analgesics, Analgesics, Non-Narcotic, Anti-Infective Agents, Antimalarials, Antiparasitic Agents, Antiprotozoal Agents, Central Nervous System Agents, Muscle Relaxants, Central, Neuromuscular Agents, Peripheral Nervous System Agents, Sensory System Agents,	Yes	No
Nandrolone	0.0364743	11	Anabolic Agents, Androgens, Hormones, Hormone Substitutes, and Hormone Antagonists, Hormones,	No	No
Agar	0.0391486	18	Culture Media,	Yes	No
Formaldehyde	0.039228	220	Anti-Infective Agents, Disinfectants, Fixatives,	Yes	No
Trimethaphan	0.0392616	14	Adjuvants, Anesthesia, Antihypertensive Agents, Autonomic Agents, Cardiovascular Agents, Cholinergic Agents, Central Nervous System Agents, Cholinergic Antagonists, Ganglionic Blockers, Peripheral Nervous System Agents, Neurotransmitter Agents, Nicotinic Antagonists,	No	No
Silicon	0.0393401	26	Micronutrients, Growth Substances, Trace Elements,	Yes	No
Immunoglobulin Allotypes	0.0396838	12	Immunologic Factors,	No	No
Mirtazapine	0.0397221	6	Adrenergic alpha-Antagonists, Adrenergic Agents, Adrenergic Antagonists, Antidepressive Agents, Antidepressive Agents, Tricyclic, Central Nervous System Agents, Histamine Agents, Histamine Antagonists, Neurotransmitter Agents, Histamine H1 Antagonists, Psychotropic Drugs,	No	No
Zinostatin	0.0417882	20	Antibiotics, Antineoplastic, Antineoplastic Agents, Cytotoxins, Enzyme Inhibitors, Noxae, Nucleic Acid Synthesis Inhibitors,	Yes	No
Flumazenil	0.0421204	18	Antidotes, GABA Agents, GABA Modulators, Protective Agents, Neurotransmitter Agents,	No	No
Trimetrexate	0.0431791	11	Anti-Infective Agents, Antifungal Agents, Antimetabolites, Antimetabolites, Antineoplastic, Antineoplastic Agents, Enzyme Inhibitors, Folic Acid Antagonists, Noxae,	Yes	No
Cefaclor	0.0431791	17	Anti-Bacterial Agents, Anti-Infective Agents,	No	No
Eplerenone	0.0431791	7	Aldosterone Antagonists, Hormone Antagonists, Hormones, Hormone Substitutes, and Hormone Antagonists,	No	No
Eflornithine	0.0442197	22	Anti-Infective Agents, Antineoplastic Agents, Antiparasitic Agents, Antiprotozoal Agents, Enzyme Inhibitors, Trypanocidal Agents,	Yes	No
Dehydroepiandrosterone	0.0453053	12	Adjuvants, Immunologic, Immunologic Factors,	Yes	No
Cyclin-Dependent Kinase Inhibitor P19	0.0455138	202	Enzyme Inhibitors, Protein Kinase Inhibitors,	No	No
Diethylnitrosamine	0.0470649	56	Alkylating Agents, Noxae,	Yes	No
Metronidazole	0.0488709	47	Anti-Infective Agents, Antiparasitic Agents, Antiprotozoal Agents, Radiation-Sensitizing Agents,	Yes	No
Lactose	0.0488709	39	Flavoring Agents, Food Additives, Sweetening Agents,	No	No
Protamines	0.0498894	52	Coagulants, Hematologic Agents, Heparin Antagonists,	Yes	No
Nitroglycerin	0.0498894	67	Cardiovascular Agents, Explosive Agents, Vasodilator Agents,	No	No
Cyclin-Dependent Kinase Inhibitor Proteins	0.0498894	55	Enzyme Inhibitors, Protein Kinase Inhibitors,	No	No
Cefditoren	0.050566	16	Anti-Bacterial Agents, Anti-Infective Agents,	No	No
Endorphins	0.0513834	8	Neurotransmitter Agents,	Yes	No
Immunotoxins	0.0516674	38	Immunologic Factors,	Yes	No
Coagulase	0.0516674	19	Coagulants, Hematologic Agents,	No	No
Clonazepam	0.0525023	18	Anticonvulsants, Central Nervous System Agents, GABA Agents, GABA Modulators, Neurotransmitter Agents,	No	No
Bongkrekic Acid	0.052721	20	Anti-Bacterial Agents, Anti-Infective Agents,	No	No
Tetrazolium Salts	0.0534974	169	Indicators and Reagents,	Yes	No
Rhodamines	0.0537704	71	Coloring Agents, Fluorescent Dyes, Luminescent Agents, Indicators and Reagents,	Yes	No
Razoxane	0.0542496	10	Antineoplastic Agents, Cardiovascular Agents, Chelating Agents,	Yes	No
Sufentanil	0.054735	10	Adjuvants, Anesthesia, Analgesics, Analgesics, Opioid, Anesthetics, Anesthetics, General, Anesthetics, Intravenous, Central Nervous System Depressants, Central Nervous System Agents, Narcotics, Peripheral Nervous System Agents, Sensory System Agents,	No	No
Tachykinins	0.054735	8	Neurotransmitter Agents,	No	No
Pergolide	0.054735	5	Dopamine Agents, Dopamine Agonists, Neurotransmitter Agents,	No	No
Fumonisins	0.0549826	7	Noxae, Poisons,	No	No
Floxuridine	0.0557752	7	Antineoplastic Agents, Antimetabolites, Antimetabolites, Antineoplastic, Noxae,	Yes	No
Desogestrel	0.0595167	6	Contraceptive Agents, Contraceptive Agents, Female, Contraceptives, Oral, Contraceptives, Oral, Synthetic, Hormones, Hormones, Hormone Substitutes, and Hormone Antagonists, Progestins, Reproductive Control Agents,	No	No
Donepezil	0.0598274	10	Central Nervous System Agents, Cholinergic Agents, Cholinesterase Inhibitors, Enzyme Inhibitors, Neurotransmitter Agents, Nootropic Agents,	No	No
Chlorhexidine	0.0605379	25	Anti-Infective Agents, Anti-Infective Agents, Local, Cosmetics, Disinfectants, Mouthwashes,	No	No
Botulinum Toxin Type A	0.061313	11	Noxae, Neuromuscular Agents, Peripheral Nervous System Agents, Neurotoxins,	No	No
Motilin	0.0621282	14	Gastrointestinal Agents,	Yes	No
Benzphetamine	0.0621774	10	Adrenergic Agents, Adrenergic Uptake Inhibitors, Autonomic Agents, Central Nervous System Agents, Central Nervous System Stimulants, Dopamine Agents, Dopamine Uptake Inhibitors, Peripheral Nervous System Agents, Neurotransmitter Agents, Neurotransmitter Uptake Inhibitors, Sympathomimetics,	No	No
Mesna	0.0623648	5	Protective Agents,	Yes	No
Phosphothreonine	0.0649418	115	Indicators and Reagents,	No	No
Fulvestrant	0.0663564	18	Antineoplastic Agents, Antineoplastic Agents, Hormonal, Estrogen Receptor Modulators, Estrogen Antagonists, Hormone Antagonists, Hormones, Hormone Substitutes, and Hormone Antagonists,	No	No
Albendazole	0.067125	4	Anthelmintics, Anti-Infective Agents, Anticestodal Agents, Antimitotic Agents, Antiparasitic Agents, Antiplatyhelmintic Agents, Antiprotozoal Agents, Mitosis Modulators, Tubulin Modulators,	No	No
Curcumin	0.0684944	135	Analgesics, Analgesics, Non-Narcotic, Anti-Inflammatory Agents, Anti-Inflammatory Agents, Non-Steroidal, Antineoplastic Agents, Antirheumatic Agents, Coloring Agents, Enzyme Inhibitors, Peripheral Nervous System Agents, Sensory System Agents,	Yes	No
Pemetrexed	0.0685578	5	Antimetabolites, Antimetabolites, Antineoplastic, Antineoplastic Agents, Enzyme Inhibitors, Folic Acid Antagonists, Noxae,	No	No
Mitomycins	0.0687124	79	Antibiotics, Antineoplastic, Antineoplastic Agents,	Yes	No
P-Dimethylaminoazobenzene	0.073541	19	Carcinogens, Coloring Agents, Noxae,	No	No
Abciximab	0.075468	6	Anticoagulants, Hematologic Agents, Platelet Aggregation Inhibitors,	No	No
Ras Gtpase-Activating Proteins	0.0764744	169	Enzyme Activators, GTP Phosphohydrolase Activators,	No	No
Pentetic Acid	0.0767278	24	Antidotes, Chelating Agents, Protective Agents, Iron Chelating Agents,	Yes	No
Guanethidine	0.0770271	31	Adrenergic Agents, Antihypertensive Agents, Autonomic Agents, Cardiovascular Agents, Peripheral Nervous System Agents, Neurotransmitter Agents, Sympatholytics,	No	No
Triclosan	0.0772227	5	Anti-Infective Agents, Anti-Infective Agents, Local, Antilipemic Agents, Antimetabolites, Fatty Acid Synthesis Inhibitors,	No	No
Nocodazole	0.0780644	264	Antimitotic Agents, Antineoplastic Agents, Mitosis Modulators, Tubulin Modulators,	No	No
Rheumatoid Factor	0.0791982	19	Immunologic Factors,	No	No
Trypan Blue	0.081051	265	Coloring Agents,	No	No
Dynorphins	0.081051	15	Neurotransmitter Agents,	No	No
Flecainide	0.0815485	9	Anti-Arrhythmia Agents, Cardiovascular Agents,	No	No
Cefazolin	0.0817648	21	Anti-Bacterial Agents, Anti-Infective Agents,	No	No
Adalimumab	0.0829572	4	Anti-Inflammatory Agents, Antirheumatic Agents,	No	No
Uric Acid	0.0844962	11	Antioxidants, Protective Agents,	Yes	No
Picrotoxin	0.0849106	22	Antidotes, Central Nervous System Stimulants, Central Nervous System Agents, Convulsants, GABA Agents, GABA Antagonists, Protective Agents, Neurotransmitter Agents,	No	No
Glycyrrhizic Acid	0.085059	20	Anti-Inflammatory Agents,	No	No
Clavulanic Acid	0.0873065	33	Anti-Bacterial Agents, Anti-Infective Agents, Enzyme Inhibitors,	No	No
Charybdotoxin	0.0877854	11	Noxae, Neurotoxins,	No	No
Ertapenem	0.0882312	5	Anti-Bacterial Agents, Anti-Infective Agents,	No	No
Kinetin	0.0912757	72	Growth Substances, Plant Growth Regulators,	Yes	No
Nimodipine	0.0924129	51	Antihypertensive Agents, Cardiovascular Agents, Calcium Channel Blockers, Membrane Transport Modulators, Vasodilator Agents,	No	No
Lopinavir	0.0924949	7	Anti-Infective Agents, Anti-HIV Agents, Anti-Retroviral Agents, Antiviral Agents, Enzyme Inhibitors, Protease Inhibitors, HIV Protease Inhibitors,	No	No
Platelet Factor 4	0.0944244	12	Coagulants, Hematologic Agents,	No	No
Flurbiprofen	0.095172	18	Analgesics, Analgesics, Non-Narcotic, Anti-Inflammatory Agents, Anti-Inflammatory Agents, Non-Steroidal, Antirheumatic Agents, Central Nervous System Agents, Cyclooxygenase Inhibitors, Enzyme Inhibitors, Peripheral Nervous System Agents, Sensory System Agents,	No	No
Cloprostenol	0.0972176	5	Contraceptive Agents, Contraceptive Agents, Female, Luteolytic Agents, Reproductive Control Agents,	No	No
Aflatoxins	0.100495	19	Noxae, Poisons,	No	No
Amprenavir	0.10089	5	Anti-Bacterial Agents, Anti-Infective Agents, Anti-HIV Agents, Antibiotics, Antitubercular, Anti-Retroviral Agents, Antitubercular Agents, Antiviral Agents, Enzyme Inhibitors, HIV Protease Inhibitors, Protease Inhibitors,	No	No
Fluorescein	0.102458	491	Contrast Media, Coloring Agents, Fluorescent Dyes, Luminescent Agents, Indicators and Reagents,	No	No
Clotrimazole	0.103056	29	Anti-Infective Agents, Anti-Infective Agents, Local, Antifungal Agents,	No	No
Palmitic Acid	0.10568	34	Enzyme Inhibitors,	Yes	No
Chlorine	0.105736	19	Chemical Warfare Agents, Noxae, Poisons,	Yes	No
Enflurane	0.105765	18	Anesthetics, Anesthetics, General, Anesthetics, Inhalation, Central Nervous System Agents, Central Nervous System Depressants,	Yes	No
Metyrapone	0.106542	29	Antimetabolites, Enzyme Inhibitors, Noxae,	Yes	No
Hepatitis C Antibodies	0.107017	47	Immunologic Factors,	No	No
Povidone	0.107958	11	Blood Substitutes, Hematologic Agents, Pharmaceutic Aids, Plasma Substitutes,	Yes	No
Dextroamphetamine	0.108011	14	Central Nervous System Agents, Central Nervous System Stimulants, Dopamine Agents, Dopamine Uptake Inhibitors, Neurotransmitter Agents, Neurotransmitter Uptake Inhibitors,	No	No
Dansyl Compounds	0.108996	11	Indicators and Reagents,	No	No
Phenylpropanolamine	0.109124	12	Adrenergic Agents, Adrenergic Agonists, Adrenergic alpha-Agonists, Anti-Obesity Agents, Autonomic Agents, Appetite Depressants, Cardiovascular Agents, Central Nervous System Agents, Nasal Decongestants, Peripheral Nervous System Agents, Neurotransmitter Agents, Sympathomimetics, Vasoconstrictor Agents, Respiratory System Agents,	No	No
Etomidate	0.112501	21	Anesthetics, Anesthetics, General, Anesthetics, Intravenous, Central Nervous System Agents, Central Nervous System Depressants, Hypnotics and Sedatives,	No	No
Pentylenetetrazole	0.113898	27	Central Nervous System Stimulants, Central Nervous System Agents, Convulsants, GABA Agents, GABA Antagonists, Neurotransmitter Agents,	No	No
Cephalexin	0.115213	21	Anti-Bacterial Agents, Anti-Infective Agents,	No	No
Meglumine	0.116544	13	Contrast Media,	Yes	No
Immunoglobulin Idiotypes	0.117562	35	Immunologic Factors,	No	No
Lanreotide	0.117624	16	Antineoplastic Agents,	No	No
Duloxetine	0.121573	6	Adrenergic Agents, Adrenergic Uptake Inhibitors, Antidepressive Agents, Central Nervous System Agents, Dopamine Agents, Dopamine Uptake Inhibitors, Neurotransmitter Agents, Neurotransmitter Uptake Inhibitors, Serotonin Agents, Serotonin Uptake Inhibitors, Psychotropic Drugs,	No	No
Teicoplanin	0.121573	17	Anti-Bacterial Agents, Anti-Infective Agents,	No	No
Opsonin Proteins	0.123703	14	Immunologic Factors,	No	No
Flunarizine	0.125094	16	Anticonvulsants, Cardiovascular Agents, Calcium Channel Blockers, Central Nervous System Agents, Membrane Transport Modulators, Histamine Agents, Neurotransmitter Agents, Histamine Antagonists, Histamine H1 Antagonists, Vasodilator Agents,	No	No
Thimerosal	0.125781	13	Pharmaceutic Aids, Preservatives, Pharmaceutical,	No	No
Ticlopidine	0.126084	15	Cardiovascular Agents, Fibrinolytic Agents, Fibrin Modulating Agents, Hematologic Agents, Platelet Aggregation Inhibitors,	No	No
Alprostadil	0.13128	37	Cardiovascular Agents, Fibrinolytic Agents, Fibrin Modulating Agents, Hematologic Agents, Platelet Aggregation Inhibitors, Vasodilator Agents,	Yes	No
Atazanavir	0.131457	5	Anti-Infective Agents, Anti-HIV Agents, Anti-Retroviral Agents, Antiviral Agents, Enzyme Inhibitors, Protease Inhibitors, HIV Protease Inhibitors,	No	No
Piperacillin	0.132451	47	Anti-Infective Agents, Anti-Bacterial Agents,	No	No
Botulinum Toxins	0.13389	51	Anti-Dyskinesia Agents, Central Nervous System Agents, Noxae, Poisons,	Yes	No
Idarubicin	0.141115	44	Antibiotics, Antineoplastic, Antineoplastic Agents,	No	No
Phalloidine	0.142047	15	Noxae, Poisons,	No	No
Bicuculline	0.147261	41	Central Nervous System Agents, Central Nervous System Stimulants, Convulsants, GABA Agents, GABA Antagonists, Neurotransmitter Agents,	No	No
Alpha-Msh	0.147853	10	Hormones, Hormones, Hormone Substitutes, and Hormone Antagonists,	No	No
Timolol	0.159459	22	Adrenergic Agents, Adrenergic Antagonists, Adrenergic beta-Antagonists, Anti-Arrhythmia Agents, Antihypertensive Agents, Cardiovascular Agents, Neurotransmitter Agents,	No	No
Proflavine	0.163011	4	Anti-Infective Agents, Anti-Infective Agents, Local,	No	No
Complement C1Q	0.163979	9	Immunologic Factors,	No	No
Nalidixic Acid	0.164853	62	Anti-Infective Agents, Enzyme Inhibitors, Nucleic Acid Synthesis Inhibitors,	No	No
Synephrine	0.166099	3	Adrenergic Agents, Adrenergic Agonists, Adrenergic alpha-Agonists, Autonomic Agents, Cardiovascular Agents, Nasal Decongestants, Peripheral Nervous System Agents, Neurotransmitter Agents, Sympathomimetics, Vasoconstrictor Agents, Respiratory System Agents,	No	No
Bcg Vaccine	0.169863	28	Adjuvants, Immunologic, Immunologic Factors,	Yes	No
Corticotropin-Releasing Hormone	0.172489	265	Hormones, Hormones, Hormone Substitutes, and Hormone Antagonists,	Yes	No
Nabumetone	0.173629	6	Analgesics, Analgesics, Non-Narcotic, Anti-Inflammatory Agents, Non-Steroidal, Anti-Inflammatory Agents, Antirheumatic Agents, Peripheral Nervous System Agents, Sensory System Agents,	No	No
Valinomycin	0.178751	11	Anti-Bacterial Agents, Anti-Infective Agents, Membrane Transport Modulators, Ionophores,	No	No
Zalcitabine	0.181054	5	Anti-HIV Agents, Anti-Infective Agents, Anti-Retroviral Agents, Antimetabolites, Antiviral Agents, Enzyme Inhibitors, Noxae, Nucleic Acid Synthesis Inhibitors, Reverse Transcriptase Inhibitors,	No	No
Methanol	0.182787	26	Solvents,	No	No
Technetium Tc 99M Sestamibi	0.183315	19	Indicators and Reagents, Radiopharmaceuticals,	Yes	No
Mezlocillin	0.184395	7	Anti-Infective Agents, Anti-Bacterial Agents,	No	No
Mibefradil	0.188477	4	Antihypertensive Agents, Cardiovascular Agents, Calcium Channel Blockers, Membrane Transport Modulators, Vasodilator Agents,	No	No
Sodium Hypochlorite	0.18895	12	Anti-Infective Agents, Disinfectants, Noxae, Oxidants,	No	No
Cefonicid	0.193481	3	Anti-Bacterial Agents, Anti-Infective Agents,	No	No
Ethosuximide	0.203424	14	Anticonvulsants, Central Nervous System Agents,	No	No
Aphidicolin	0.205944	138	Anti-Infective Agents, Antiviral Agents, Enzyme Inhibitors,	No	No
Streptavidin	0.216264	7	Indicators and Reagents,	Yes	No
Phenolsulfonphthalein	0.216614	9	Coloring Agents, Indicators and Reagents,	No	No
Cyclosporins	0.220187	37	Enzyme Inhibitors, Immunologic Factors, Immunosuppressive Agents,	Yes	No
Levonorgestrel	0.226376	22	Contraceptive Agents, Contraceptive Agents, Female, Contraceptives, Oral, Contraceptives, Oral, Synthetic, Reproductive Control Agents,	No	No
Cefpodoxime	0.226504	9	Anti-Bacterial Agents, Anti-Infective Agents,	No	No
Astemizole	0.228954	3	Anti-Allergic Agents, Neurotransmitter Agents, Histamine Agents, Histamine Antagonists, Histamine H1 Antagonists, Histamine H1 Antagonists, Non-Sedating,	No	No
Technetium Tc 99M Sulfur Colloid	0.230175	10	Indicators and Reagents, Radiopharmaceuticals,	Yes	No
Vitamin K 1	0.230175	7	Antifibrinolytic Agents, Coagulants, Fibrin Modulating Agents, Micronutrients, Growth Substances, Hematologic Agents, Hemostatics, Vitamins,	No	No
Iofetamine	0.231345	40	Indicators and Reagents, Radiopharmaceuticals,	No	No
Ng-Nitroarginine Methyl Ester	0.231662	106	Enzyme Inhibitors,	Yes	No
Cyclin-Dependent Kinase Inhibitor P15	0.233859	915	Enzyme Inhibitors, Protein Kinase Inhibitors,	Yes	No
Aluminum Sulfate	0.233987	3	Adjuvants, Immunologic, Immunologic Factors,	No	No
Ceftazidime	0.237567	47	Anti-Bacterial Agents, Anti-Infective Agents,	No	No
Atomoxetine	0.237702	4	Adrenergic Agents, Adrenergic Uptake Inhibitors, Neurotransmitter Agents, Neurotransmitter Uptake Inhibitors,	No	No
Nitrogen Mustard Compounds	0.244017	14	Alkylating Agents, Antineoplastic Agents, Alkylating, Antineoplastic Agents, Noxae,	Yes	No
Cefixime	0.244154	17	Anti-Bacterial Agents, Anti-Infective Agents,	No	No
S-Nitrosoglutathione	0.247171	15	Anti-Asthmatic Agents, Anti-Infective Agents, Autonomic Agents, Bronchodilator Agents, Cardiovascular Agents, Central Nervous System Agents, Protective Agents, Neuroprotective Agents, Hematologic Agents, Peripheral Nervous System Agents, Platelet Aggregation Inhibitors, Nitric Oxide Donors, Vasodilator Agents, Respiratory System Agents,	No	No
Fexofenadine	0.24757	9	Anti-Allergic Agents, Histamine Agents, Neurotransmitter Agents, Histamine Antagonists, Histamine H1 Antagonists, Histamine H1 Antagonists, Non-Sedating,	No	No
Oxycodone	0.248662	5	Analgesics, Analgesics, Opioid, Central Nervous System Agents, Central Nervous System Depressants, Narcotics, Peripheral Nervous System Agents, Sensory System Agents,	No	No
Zolpidem	0.248664	8	Central Nervous System Agents, Central Nervous System Depressants, GABA Agents, GABA Agonists, Hypnotics and Sedatives, Neurotransmitter Agents,	No	No
Dienestrol	0.248713	4	Estrogens, Estrogens, Non-Steroidal, Hormones, Hormones, Hormone Substitutes, and Hormone Antagonists,	No	No
Tibolone	0.24914	8	Anabolic Agents, Androgen Antagonists, Antihypertensive Agents, Antineoplastic Agents, Antineoplastic Agents, Hormonal, Cardiovascular Agents, Estrogen Receptor Modulators, Hormones, Hormone Substitutes, and Hormone Antagonists, Hormone Antagonists, Hormones,	No	No
Beta-Naphthoflavone	0.251562	23	Enzyme Inhibitors,	No	No
Barium Sulfate	0.251695	21	Contrast Media,	Yes	No
Mazindol	0.262071	3	Adrenergic Agents, Adrenergic Uptake Inhibitors, Central Nervous System Agents, Central Nervous System Stimulants, Dopamine Agents, Dopamine Uptake Inhibitors, Neurotransmitter Agents, Neurotransmitter Uptake Inhibitors,	No	No
Sodium Pertechnetate Tc 99M	0.266926	13	Indicators and Reagents, Radiopharmaceuticals,	No	No
Tolterodine	0.287305	7	Cholinergic Agents, Cholinergic Antagonists, Muscarinic Antagonists, Neurotransmitter Agents,	No	No
Megestrol	0.288925	12	Antineoplastic Agents, Hormonal, Antineoplastic Agents, Contraceptive Agents, Contraceptive Agents, Female, Contraceptives, Oral, Contraceptives, Oral, Synthetic, Reproductive Control Agents,	No	No
Procarbazine	0.291655	28	Antineoplastic Agents,	No	No
Gtpase-Activating Proteins	0.294865	293	Enzyme Activators, GTP Phosphohydrolase Activators,	Yes	No
Complement C3	0.297281	152	Immunologic Factors,	Yes	No
Interleukin-12	0.297643	499	Adjuvants, Immunologic, Angiogenesis Inhibitors, Angiogenesis Modulating Agents, Antineoplastic Agents, Immunologic Factors, Growth Substances, Growth Inhibitors,	Yes	No
Cyclin-Dependent Kinase Inhibitor P18	0.298692	372	Enzyme Inhibitors, Protein Kinase Inhibitors,	No	No
Cyproheptadine	0.301657	3	Anti-Allergic Agents, Antipruritics, Dermatologic Agents, Gastrointestinal Agents, Neurotransmitter Agents, Histamine Agents, Histamine Antagonists, Histamine H1 Antagonists, Serotonin Agents, Serotonin Antagonists,	No	No
Defensins	0.302399	17	Anti-Infective Agents,	No	No
Sulbactam	0.307926	19	Anti-Bacterial Agents, Anti-Infective Agents, Enzyme Inhibitors,	No	No
Chlorthalidone	0.313121	5	Antihypertensive Agents, Cardiovascular Agents, Diuretics, Membrane Transport Modulators, Natriuretic Agents, Sodium Chloride Symporter Inhibitors,	No	No
Ticarcillin	0.318157	5	Anti-Bacterial Agents, Anti-Infective Agents,	No	No
Mifepristone	0.319151	273	Abortifacient Agents, Abortifacient Agents, Steroidal, Contraceptive Agents, Contraceptive Agents, Female, Contraceptives, Oral, Contraceptives, Oral, Synthetic, Contraceptives, Postcoital, Contraceptives, Postcoital, Synthetic, Luteolytic Agents, Hormones, Hormone Substitutes, and Hormone Antagonists, Menstruation-Inducing Agents, Hormone Antagonists, Reproductive Control Agents,	Yes	No
Talc	0.319975	4	Antiperspirants, Cosmetics,	No	No
Thioctic Acid	0.32058	9	Antioxidants, Micronutrients, Protective Agents, Growth Substances, Vitamin B Complex, Vitamins,	No	No
Acetoxyacetylaminofluorene	0.321795	18	Alkylating Agents, Noxae,	No	No
Nonoxynol	0.321795	4	Antispermatogenic Agents, Contraceptive Agents, Contraceptive Agents, Female, Noxae, Spermatocidal Agents, Surface-Active Agents, Reproductive Control Agents,	No	No
Darifenacin	0.324132	3	Cholinergic Agents, Cholinergic Antagonists, Muscarinic Antagonists, Neurotransmitter Agents,	No	No
Misoprostol	0.328992	31	Abortifacient Agents, Abortifacient Agents, Nonsteroidal, Anti-Ulcer Agents, Gastrointestinal Agents, Oxytocics, Reproductive Control Agents,	No	No
Irinotecan	0.329717	176	Antineoplastic Agents, Antineoplastic Agents, Phytogenic, Enzyme Inhibitors,	No	No
Amoxicillin	0.336541	103	Anti-Bacterial Agents, Anti-Infective Agents,	No	No
Chenodeoxycholic Acid	0.336901	9	Cathartics, Gastrointestinal Agents,	Yes	No
Gossypol	0.338241	13	Contraceptive Agents, Contraceptive Agents, Male, Reproductive Control Agents,	Yes	No
Carbenicillin	0.343676	12	Anti-Bacterial Agents, Anti-Infective Agents,	No	No
Alpha-Defensins	0.345825	11	Anti-Infective Agents,	No	No
Phosphatidylethanolamine Binding Protein	0.355392	20	Enzyme Inhibitors, Protein Kinase Inhibitors,	No	No
Aceclofenac	0.356115	4	Analgesics, Analgesics, Non-Narcotic, Anti-Inflammatory Agents, Anti-Inflammatory Agents, Non-Steroidal, Antirheumatic Agents, Peripheral Nervous System Agents, Sensory System Agents,	No	No
4-Aminopyridine	0.360243	111	Cardiovascular Agents, Membrane Transport Modulators, Potassium Channel Blockers,	No	No
Immunoglobulin Mu-Chains	0.362055	48	Immunologic Factors,	No	No
Flavin Mononucleotide	0.363282	17	Micronutrients, Growth Substances, Vitamin B Complex, Vitamins,	No	No
Toluene	0.372623	30	Solvents,	No	No
Carbocyanines	0.373008	11	Coloring Agents,	Yes	No
Brimonidine	0.375407	7	Adrenergic Agonists, Adrenergic alpha-Agonists, Adrenergic Agents, Antihypertensive Agents, Cardiovascular Agents, Neurotransmitter Agents,	No	No
Taurochenodeoxycholic Acid	0.375407	11	Cholagogues and Choleretics, Detergents, Surface-Active Agents, Gastrointestinal Agents,	No	No
Dichlororibofuranosylbenzimidazole	0.37765	25	Enzyme Inhibitors, Nucleic Acid Synthesis Inhibitors,	No	No
Cycloserine	0.387369	10	Anti-Bacterial Agents, Anti-Infective Agents, Anti-Infective Agents, Urinary, Antibiotics, Antitubercular, Antimetabolites, Antitubercular Agents, Noxae, Renal Agents,	No	No
Tosyllysine Chloromethyl Ketone	0.387369	9	Alkylating Agents, Enzyme Inhibitors, Protease Inhibitors, Noxae, Protein Synthesis Inhibitors, Serine Proteinase Inhibitors,	No	No
Ethylnitrosourea	0.394125	38	Alkylating Agents, Noxae,	No	No
Aspirin	0.399314	442	Analgesics, Analgesics, Non-Narcotic, Anti-Inflammatory Agents, Anti-Inflammatory Agents, Non-Steroidal, Antirheumatic Agents, Cardiovascular Agents, Enzyme Inhibitors, Cyclooxygenase Inhibitors, Fibrinolytic Agents, Fibrin Modulating Agents, Peripheral Nervous System Agents, Hematologic Agents, Platelet Aggregation Inhibitors, Sensory System Agents,	Yes	No
Tetraethylammonium	0.400182	29	Cardiovascular Agents, Membrane Transport Modulators, Potassium Channel Blockers,	Yes	No
Labetalol	0.400182	7	Adrenergic alpha-Antagonists, Adrenergic Agents, Adrenergic Antagonists, Adrenergic beta-Antagonists, Antihypertensive Agents, Autonomic Agents, Cardiovascular Agents, Peripheral Nervous System Agents, Neurotransmitter Agents, Sympatholytics,	No	No
Glutaral	0.403345	7	Anti-Infective Agents, Disinfectants, Cross-Linking Reagents, Fixatives, Indicators and Reagents,	No	No
Desoxycorticosterone	0.40632	14	Mineralocorticoids, Hormones, Hormones, Hormone Substitutes, and Hormone Antagonists,	No	No
Ibutilide	0.40632	7	Anti-Arrhythmia Agents, Cardiovascular Agents,	No	No
Gemifloxacin	0.412961	57	Anti-Bacterial Agents, Anti-Infective Agents,	No	No
Bicalutamide	0.421723	33	Androgen Antagonists, Antineoplastic Agents, Hormone Antagonists, Hormones, Hormone Substitutes, and Hormone Antagonists,	No	No
Doxycycline	0.423597	226	Anti-Bacterial Agents, Anti-Infective Agents, Antimalarials, Antiparasitic Agents, Antiprotozoal Agents,	Yes	No
Benzalkonium Compounds	0.442425	38	Anti-Infective Agents, Anti-Infective Agents, Local, Detergents, Pharmaceutic Aids, Preservatives, Pharmaceutical, Surface-Active Agents,	No	No
2-Aminopurine	0.444323	36	Antimetabolites, Noxae,	No	No
Hypochlorous Acid	0.445013	14	Noxae, Oxidants,	No	No
Vitamin K 3	0.448901	30	Antifibrinolytic Agents, Coagulants, Fibrin Modulating Agents, Micronutrients, Growth Substances, Hematologic Agents, Hemostatics, Vitamins,	Yes	No
Tetracycline	0.449136	742	Anti-Bacterial Agents, Anti-Infective Agents, Enzyme Inhibitors, Protein Synthesis Inhibitors,	Yes	No
Amitriptyline	0.453866	30	Adrenergic Agents, Analgesics, Analgesics, Non-Narcotic, Adrenergic Uptake Inhibitors, Antidepressive Agents, Antidepressive Agents, Tricyclic, Central Nervous System Agents, Peripheral Nervous System Agents, Neurotransmitter Agents, Neurotransmitter Uptake Inhibitors, Psychotropic Drugs, Sensory System Agents,	No	No
Quercetin	0.458715	193	Antioxidants, Protective Agents,	Yes	No
Rivastigmine	0.470993	6	Cholinergic Agents, Central Nervous System Agents, Cholinesterase Inhibitors, Enzyme Inhibitors, Protective Agents, Neuroprotective Agents, Neurotransmitter Agents,	No	No
Iopromide	0.471935	4	Contrast Media,	No	No
Ceftizoxime	0.478707	15	Anti-Bacterial Agents, Anti-Infective Agents,	No	No
Mianserin	0.48521	5	Adrenergic alpha-Antagonists, Adrenergic Agents, Adrenergic Antagonists, Antidepressive Agents, Antidepressive Agents, Second-Generation, Central Nervous System Agents, Histamine Agents, Histamine Antagonists, Neurotransmitter Agents, Histamine H1 Antagonists, Serotonin Agents, Serotonin Antagonists, Psychotropic Drugs,	No	No
Maprotiline	0.495306	4	Adrenergic Agents, Adrenergic Uptake Inhibitors, Antidepressive Agents, Antidepressive Agents, Second-Generation, Central Nervous System Agents, Neurotransmitter Agents, Neurotransmitter Uptake Inhibitors, Psychotropic Drugs,	No	No
Methenamine	0.495306	3	Anti-Infective Agents, Anti-Infective Agents, Urinary, Renal Agents,	No	No
Dideoxynucleosides	0.495306	12	Anti-Infective Agents, Anti-Retroviral Agents, Antimetabolites, Antiviral Agents, Enzyme Inhibitors, Noxae, Nucleic Acid Synthesis Inhibitors, Reverse Transcriptase Inhibitors,	No	No
Bevacizumab	0.497981	21	Angiogenesis Inhibitors, Angiogenesis Modulating Agents, Antineoplastic Agents, Growth Substances, Growth Inhibitors,	No	No
Aflatoxin B1	0.499358	18	Noxae, Poisons,	No	No
Triethylenetetramine	0.508371	6	Chelating Agents,	No	No
Iproniazid	0.51255	5	Antidepressive Agents, Central Nervous System Agents, Enzyme Inhibitors, Monoamine Oxidase Inhibitors, Psychotropic Drugs,	No	No
Omega-N-Methylarginine	0.514425	24	Enzyme Inhibitors,	Yes	No
Complement C3B	0.515686	67	Immunologic Factors,	No	No
Trichloroethylene	0.518238	14	Anesthetics, Anesthetics, General, Anesthetics, Inhalation, Central Nervous System Depressants, Central Nervous System Agents, Solvents,	No	No
Dipyrone	0.520873	22	Analgesics, Analgesics, Non-Narcotic, Anti-Inflammatory Agents, Anti-Inflammatory Agents, Non-Steroidal, Antirheumatic Agents, Peripheral Nervous System Agents, Sensory System Agents,	No	No
Alefacept	0.529916	3	Dermatologic Agents,	No	No
Aminophylline	0.534842	20	Anti-Asthmatic Agents, Autonomic Agents, Cardiotonic Agents, Cardiovascular Agents, Bronchodilator Agents, Enzyme Inhibitors, Protective Agents, Peripheral Nervous System Agents, Phosphodiesterase Inhibitors, Respiratory System Agents,	No	No
Diethylhexyl Phthalate	0.535631	24	Plasticizers,	Yes	No
Nafenopin	0.54181	8	Antilipemic Agents, Antimetabolites, Carcinogens, Noxae, Peroxisome Proliferators,	Yes	No
Sulfamerazine	0.54181	5	Anti-Infective Agents,	No	No
Oligomycins	0.54615	18	Anti-Infective Agents, Anti-Bacterial Agents, Enzyme Inhibitors, Uncoupling Agents,	Yes	No
Fosfomycin	0.550548	10	Anti-Bacterial Agents, Anti-Infective Agents,	No	No
Complementarity Determining Regions	0.551724	10	Immunologic Factors,	No	No
Oxybutynin	0.551804	9	Autonomic Agents, Cholinergic Agents, Cholinergic Antagonists, Muscarinic Antagonists, Parasympatholytics, Peripheral Nervous System Agents, Neurotransmitter Agents,	No	No
Nitrous Oxide	0.55636	42	Analgesics, Analgesics, Non-Narcotic, Anesthetics, Anesthetics, General, Anesthetics, Inhalation, Central Nervous System Agents, Central Nervous System Depressants, Peripheral Nervous System Agents, Sensory System Agents,	Yes	No
Betamethasone	0.560756	32	Adrenal Cortex Hormones, Anti-Asthmatic Agents, Anti-Inflammatory Agents, Hormones, Hormones, Hormone Substitutes, and Hormone Antagonists, Glucocorticoids, Respiratory System Agents,	No	No
Neuronal Apoptosis-Inhibitory Protein	0.565381	94	Enzyme Inhibitors,	No	No
Aurothioglucose	0.568801	5	Antirheumatic Agents,	No	No
Dofetilide	0.569289	12	Anti-Arrhythmia Agents, Cardiovascular Agents, Membrane Transport Modulators, Potassium Channel Blockers,	No	No
Lisuride	0.570609	4	Anti-Dyskinesia Agents, Antiparkinson Agents, Central Nervous System Agents, Dopamine Agents, Dopamine Agonists, Neurotransmitter Agents, Serotonin Agents, Serotonin Agonists,	No	No
Trilostane	0.573938	7	Abortifacient Agents, Abortifacient Agents, Steroidal, Antineoplastic Agents, Enzyme Inhibitors, Reproductive Control Agents,	No	No
Protein S	0.5861	77	Anticoagulants, Hematologic Agents,	Yes	No
Sodium Azide	0.590243	8	Cardiovascular Agents, Enzyme Inhibitors, Noxae, Mutagens, Indicators and Reagents, Vasodilator Agents,	No	No
Gold Sodium Thiomalate	0.606756	9	Antirheumatic Agents,	No	No
Dicloxacillin	0.613269	3	Anti-Bacterial Agents, Anti-Infective Agents,	No	No
Microcystins	0.615309	14	Carcinogens, Noxae,	No	No
Pirbuterol	0.617307	4	Adrenergic Agents, Adrenergic Agonists, Adrenergic beta-Agonists, Anti-Asthmatic Agents, Autonomic Agents, Cardiotonic Agents, Bronchodilator Agents, Cardiovascular Agents, Protective Agents, Peripheral Nervous System Agents, Neurotransmitter Agents, Respiratory System Agents,	No	No
Ubiquinone	0.618212	76	Micronutrients, Growth Substances,	No	No
Streptonigrin	0.621441	12	Antibiotics, Antineoplastic, Antineoplastic Agents,	No	No
Isoflurane	0.624383	134	Anesthetics, Anesthetics, General, Anesthetics, Inhalation, Central Nervous System Agents, Central Nervous System Depressants,	Yes	No
Phenformin	0.627474	11	Hypoglycemic Agents,	No	No
Ivermectin	0.639376	19	Anti-Infective Agents, Antiparasitic Agents, Pesticides, Insecticides,	No	No
Ricin	0.641611	40	Chemical Warfare Agents, Noxae, Poisons,	No	No
Polymethyl Methacrylate	0.656169	15	Antimutagenic Agents, Bone Cements, Cardiovascular Agents, Protective Agents, Vasodilator Agents, Resins, Synthetic,	No	No
Bacteriocins	0.660863	18	Anti-Bacterial Agents, Anti-Infective Agents,	No	No
Nitrofurazone	0.663985	4	Anti-Infective Agents,	No	No
Iron-Dextran Complex	0.67034	5	Hematinics, Hematologic Agents,	No	No
Esmolol	0.67271	5	Adrenergic Agents, Adrenergic Antagonists, Adrenergic beta-Antagonists, Neurotransmitter Agents,	No	No
Sulindac	0.68301	120	Analgesics, Analgesics, Non-Narcotic, Anti-Inflammatory Agents, Non-Steroidal, Anti-Inflammatory Agents, Antineoplastic Agents, Antirheumatic Agents, Cyclooxygenase Inhibitors, Enzyme Inhibitors, Peripheral Nervous System Agents, Sensory System Agents,	Yes	No
Sulfathiazole	0.687928	3	Anti-Infective Agents,	No	No
Chitosan	0.689593	24	Anticholesteremic Agents, Antilipemic Agents, Antimetabolites, Biocompatible Materials, Chelating Agents, Coagulants, Hematologic Agents, Hemostatics,	No	No
Ergotamine	0.692794	8	Adrenergic Agonists, Adrenergic alpha-Agonists, Adrenergic Agents, Analgesics, Analgesics, Non-Narcotic, Cardiovascular Agents, Central Nervous System Agents, Peripheral Nervous System Agents, Neurotransmitter Agents, Vasoconstrictor Agents, Sensory System Agents,	No	No
Cerulenin	0.694215	12	Anti-Infective Agents, Antifungal Agents, Antibiotics, Antifungal, Antilipemic Agents, Antimetabolites, Fatty Acid Synthesis Inhibitors,	No	No
Busulfan	0.694906	46	Alkylating Agents, Antineoplastic Agents, Antineoplastic Agents, Alkylating, Noxae, Immunologic Factors, Myeloablative Agonists, Immunosuppressive Agents,	No	No
Latanoprost	0.694907	10	Antihypertensive Agents, Cardiovascular Agents,	No	No
Ficusin	0.70216	10	Anthelmintics, Anti-Infective Agents, Antiparasitic Agents, Cross-Linking Reagents, Dermatologic Agents, Indicators and Reagents, Photosensitizing Agents, Radiation-Sensitizing Agents,	No	No
Travoprost	0.704446	4	Antihypertensive Agents, Cardiovascular Agents,	No	No
Polysorbates	0.704446	7	Excipients, Pharmaceutic Aids, Surface-Active Agents, Vehicles,	No	No
Tramadol	0.707654	12	Analgesics, Analgesics, Opioid, Central Nervous System Depressants, Central Nervous System Agents, Narcotics, Peripheral Nervous System Agents, Sensory System Agents,	No	No
Cilazapril	0.715901	3	Angiotensin-Converting Enzyme Inhibitors, Antihypertensive Agents, Cardiovascular Agents, Enzyme Inhibitors, Protease Inhibitors,	No	No
Dexmedetomidine	0.71608	10	Adrenergic Agonists, Adrenergic alpha-Agonists, Adrenergic Agents, Analgesics, Analgesics, Non-Narcotic, Central Nervous System Agents, Central Nervous System Depressants, Hypnotics and Sedatives, Peripheral Nervous System Agents, Neurotransmitter Agents, Sensory System Agents,	No	No
Cytochalasin D	0.740735	58	Enzyme Inhibitors, Nucleic Acid Synthesis Inhibitors,	Yes	No
Ketoprofen	0.746045	19	Analgesics, Analgesics, Non-Narcotic, Anti-Inflammatory Agents, Non-Steroidal, Anti-Inflammatory Agents, Antirheumatic Agents, Cyclooxygenase Inhibitors, Enzyme Inhibitors, Peripheral Nervous System Agents, Sensory System Agents,	No	No
Catalase	0.747555	277	Antioxidants, Protective Agents,	Yes	No
Carbamazepine	0.749627	107	Analgesics, Analgesics, Non-Narcotic, Anticonvulsants, Antimanic Agents, Central Nervous System Agents, Central Nervous System Depressants, Peripheral Nervous System Agents, Tranquilizing Agents, Psychotropic Drugs, Sensory System Agents,	No	No
Immunoglobulin Fc Fragments	0.750792	11	Immunologic Factors,	Yes	No
Hiv Antibodies	0.755254	156	Immunologic Factors,	No	No
Bortezomib	0.755978	101	Antineoplastic Agents, Enzyme Inhibitors, Protease Inhibitors,	No	No
Flutamide	0.773536	71	Androgen Antagonists, Antineoplastic Agents, Antineoplastic Agents, Hormonal, Hormone Antagonists, Hormones, Hormone Substitutes, and Hormone Antagonists,	Yes	No
Rimantadine	0.776248	5	Anti-Infective Agents, Antiviral Agents, Enzyme Inhibitors, Nucleic Acid Synthesis Inhibitors,	No	No
Atipamezole	0.781701	7	Adrenergic alpha-Antagonists, Adrenergic Agents, Adrenergic Antagonists, Neurotransmitter Agents,	No	No
Tinidazole	0.782825	11	Alkylating Agents, Anti-Infective Agents, Antiparasitic Agents, Antiprotozoal Agents, Antitrichomonal Agents, Noxae,	No	No
Halothane	0.783195	26	Anesthetics, Anesthetics, General, Anesthetics, Inhalation, Central Nervous System Agents, Central Nervous System Depressants,	Yes	No
Loperamide	0.800308	15	Antidiarrheals, Gastrointestinal Agents,	No	No
Reserpine	0.802717	98	Adrenergic Agents, Adrenergic Uptake Inhibitors, Antihypertensive Agents, Antipsychotic Agents, Cardiovascular Agents, Central Nervous System Depressants, Central Nervous System Agents, Neurotransmitter Agents, Neurotransmitter Uptake Inhibitors, Tranquilizing Agents, Psychotropic Drugs,	No	No
Ethidium	0.81912	36	Anti-Infective Agents, Antiparasitic Agents, Antiprotozoal Agents, Cholinergic Agents, Cholinergic Antagonists, Coloring Agents, Enzyme Inhibitors, Fluorescent Dyes, Indicators and Reagents, Neurotransmitter Agents, Luminescent Agents, Nicotinic Antagonists, Trypanocidal Agents,	No	No
Midodrine	0.820035	3	Adrenergic Agonists, Adrenergic alpha-Agonists, Adrenergic Agents, Autonomic Agents, Cardiovascular Agents, Peripheral Nervous System Agents, Neurotransmitter Agents, Sympathomimetics, Vasoconstrictor Agents,	No	No
Peginterferon Alfa-2A	0.820876	5	Anti-Infective Agents, Antiviral Agents,	No	No
Clofarabine	0.820926	4	Antineoplastic Agents,	No	No
Hetastarch	0.82783	14	Blood Substitutes, Hematologic Agents, Plasma Substitutes,	No	No
Tenoxicam	0.831929	4	Analgesics, Analgesics, Non-Narcotic, Anti-Inflammatory Agents, Anti-Inflammatory Agents, Non-Steroidal, Antirheumatic Agents, Cyclooxygenase Inhibitors, Enzyme Inhibitors, Peripheral Nervous System Agents, Sensory System Agents,	No	No
Modafinil	0.838966	3	Central Nervous System Agents, Central Nervous System Stimulants, Protective Agents, Neuroprotective Agents,	No	No
[truncated: 34 more rows]

## Sheet: Leukemia
Drug	FDR	DF	Pharmacological Action	Found In GS	Found In DrugBank
[truncated: 1,793 more rows]

## Sheet: Lung
Drug	FDR	DF	Pharmacological Action	Found In GS	Found In DrugBank
[truncated: 1,340 more rows]

[truncated: 2 more sheets: Ovary, Prostate]
